# Supplementary material for: Synthesis of 3‐Amino‐1‐benzothiophene‐1,1‐diones by Alkyne Directed Hydroarylation and 1/N→3/C‐Sulfonyl Migration
Source: PubMed Central journal article supplement (PMC6220774; doi:10.1002/ejoc.201801062), 2018-10-10
Supplement: EJOC-2018-5435-s001.pdf [file EJOC-2018-5435-s001.pdf]

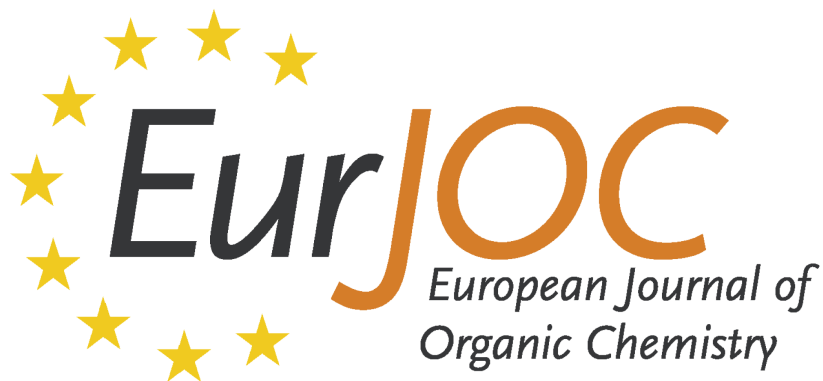

## Supporting Information

### **Synthesis of 3-Amino-1-benzothiophene-1,1-diones by Alkyne Directed Hydroarylation and 1/N→3/C-Sulfonyl Migration**

Ivan Bernar, Daniel Blanco-Ania, Sophie J. Stok, Lia Sotorríos, Enrique Gómez-Bengoa,\* and Floris P. J. T. Rutjes\*

[ejoc201801062-sup-0001-SupMat.pdf](#)

## Content

|                                                                                            |    |
|--------------------------------------------------------------------------------------------|----|
| Experimental Section .....                                                                 | 2  |
| Synthesis of Sulfonamides <b>3</b> and <b>S1–S5</b> .....                                  | 3  |
| Synthesis of 1,2-Dichlorovinyl Sulfonamides <b>S6–S11</b> .....                            | 4  |
| Synthesis of Sulfonyl Ynamines <b>1a–k</b> .....                                           | 6  |
| Optimization Studies for Intramolecular Hydroarylation of Sulfonyl Ynamine <b>1a</b> ..... | 11 |
| Intramolecular Hydroarylation of Sulfonyl Ynamine <b>1a–c</b> and <b>1g–k</b> .....        | 14 |
| Intramolecular Hydroarylation of <b>1d</b> , <b>1e</b> and <b>1f</b> .....                 | 18 |
| Intramolecular Hydroarylation of Ethyl Acrylate <b>5</b> .....                             | 18 |
| Study of Equilibration between <i>E</i> - and <i>Z</i> -isomers of <b>2a</b> .....         | 18 |
| Photochemical Rearrangement of 1,2-Benzothiazole-1,1-diones .....                          | 20 |
| X-Ray Crystallography of ( <i>E</i> )- <b>2a</b> , <b>12a</b> and <b>12d</b> .....         | 22 |
| References and Notes .....                                                                 | 24 |

## Experimental Section

Reagents were obtained from commercial suppliers and were used without purification. Standard syringe techniques were applied for the transfer of dry solvents and air- or moisture-sensitive reagents. All inert reactions were carried out under a nitrogen atmosphere using flame-dried flasks. If stated, reactions were performed in Biotage Initiator+ Microwave Synthesizer under a nitrogen atmosphere.  $^1\text{H}$  and  $^{13}\text{C}$  NMR spectra were recorded at 298 K on a Varian Inova 400 MHz or Bruker 500 MHz spectrometer in the solvent indicated. Chemical shifts are given in parts per million (ppm) with respect to tetramethylsilane (0.00 ppm) as internal standard for  $^1\text{H}$  NMR; and  $\text{CDCl}_3$  (77.16 ppm) as internal standard for  $^{13}\text{C}$  NMR. Coupling constants are reported as  $J$  values in hertz (Hz).  $^1\text{H}$  NMR data are reported as follows: chemical shift (ppm), multiplicity (s = singlet, d = doublet, quint = quintet, t = triplet and combination of them), coupling constants (Hz) and integration. All NMR signals were assigned on the basis of  $^1\text{H}$  NMR,  $^{13}\text{C}$  NMR, gCOSY, gHSQC, gHMBS and NOESY experiments. Mass spectra were recorded on a JEOL AccuTOF CS JMST100CS (ESI) mass spectrometer. Automatic flash column chromatography was performed using Biotage Isolera Spektra One, using SNAP cartridges (Biotage, 30–100  $\mu\text{m}$ , 60  $\text{\AA}$ ), 10–50 g. Analysis by TLC was conducted on Silica gel F254 (Merck KGaA) plates with detection by UV absorption (254 nm) where applicable, and by dipping into a solution of aqueous  $\text{KMnO}_4/\text{Na}_2\text{CO}_3/\text{NaOH}$  solution followed by charring at ca. 150  $^\circ\text{C}$ . IR spectra were recorded on a Bruker Tensor 27 FTIR spectrometer.

## Synthesis of Sulfonamides 3 and S1–S5

**General procedure:**<sup>1</sup> The sulfonyl chloride (11 mmol, 1.1 equiv) was added to a solution of the amine (10 mmol, 1 equiv) and pyridine (950 mg, 12 mmol, 1.2 equiv) in CH<sub>2</sub>Cl<sub>2</sub> (30 mL) portion-wise with stirring. The reaction mixture was then stirred at 23 °C for 12 h before evaporation of CH<sub>2</sub>Cl<sub>2</sub> and quenching with an aqueous NaOH solution (2 N, 100 mL). The aqueous solution was rinsed with diethyl ether (2 × 50 mL) then acidified with concentrated HCl and extracted with CH<sub>2</sub>Cl<sub>2</sub> (3 × 50 mL). The combined organic washings were dried over sodium sulfate and concentrated in vacuo. The obtained crude product was used directly in the next step without further purification.

### *N*-Phenylbenzenesulfonamide S1.

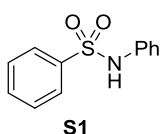

Sulfonamide **S1** was prepared from aniline (0.9 g, 10 mmol) and benzenesulfonyl chloride (1.9 g, 11 mmol) according to the general procedure and obtained in 90% yield as a white solid. <sup>1</sup>H NMR [400 MHz, δ (ppm), CDCl<sub>3</sub>]: 6.58 (br s, 1 H), 7.02–7.09 (m, 2 H), 7.09–7.18 (m, 1 H), 7.20–7.29 (m, 2 H), 7.40–7.48 (m, 2 H), 7.50–7.58 (m, 1 H), 7.72–7.79 (m, 2 H). <sup>13</sup>C NMR [101 MHz, δ (ppm), CDCl<sub>3</sub>]: 121.6, 125.4, 127.3, 129.3, 129.7, 133.0, 136.5, 139.0. These data were in accordance to those reported in the literature.<sup>2</sup>

### 4-Methyl-*N*-phenylbenzenesulfonamide 3.

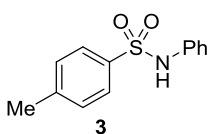

Sulfonamide **3** was prepared from aniline (0.9 g, 10 mmol) and 4-methylbenzenesulfonyl chloride (2.1 g, 11 mmol) according to the general procedure and obtained in 92% yield as a white solid. <sup>1</sup>H NMR [400 MHz, δ (ppm), CDCl<sub>3</sub>]: 2.35 (s, 3 H), 6.61 (br s, 1 H), 7.02–7.10 (m, 2 H), 7.12–7.25 (m, 5 H), 7.62–7.68 (m, 2 H). <sup>13</sup>C NMR [101 MHz, δ (ppm), CDCl<sub>3</sub>]: 21.6, 121.5, 125.1, 127.5, 129.2, 129.6, 136.0, 136.4, 143.9. These data were in accordance to those reported in the literature.<sup>2</sup>

### 4-Methoxy-*N*-phenylbenzenesulfonamide S2.

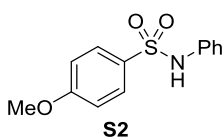

Sulfonamide **S2** was prepared from aniline (0.9 g, 10 mmol) and 4-methoxybenzenesulfonyl chloride (2.3 g, 11 mmol) according to the general procedure and obtained in 81% yield as a white solid. <sup>1</sup>H NMR [400 MHz, δ (ppm), CDCl<sub>3</sub>]: 3.82 (s, 3 H), 6.70 (br s, 1 H), 6.81–6.96 (m, 2 H), 7.03–7.15 (m, 3 H), 7.18–7.31 (m, 2 H), 7.59–7.78 (m, 2 H). <sup>13</sup>C NMR [101 MHz, δ (ppm), CDCl<sub>3</sub>]: 55.7, 114.3, 121.6, 125.2, 129.4, 129.5, 130.7, 136.9, 163.2. These data were in accordance to those reported in the literature.<sup>2</sup>

### 4-Nitro-*N*-phenylbenzenesulfonamide S3.

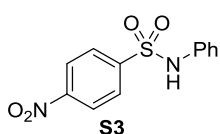

Sulfonamide **S3** was prepared from aniline (0.9 g, 10 mmol) and 4-nitrobenzenesulfonyl chloride (2.4 g, 11 mmol) according to the general procedure and obtained in 94% yield as a light yellow solid. <sup>1</sup>H NMR [400 MHz, δ (ppm),

CDCl<sub>3</sub>]: 6.02 (br s, 1 H), 7.07–7.32 (m, 5 H), 7.89–7.93 (m, 2 H), 8.22–8.30 (m, 2 H). <sup>13</sup>C NMR [101 MHz, δ (ppm), CDCl<sub>3</sub>]: 122.4, 124.3, 126.6, 128.7, 129.9, 135.2, 144.5, 150.3. These data were in accordance to those reported in the literature.<sup>3</sup>

#### ***N*-Benzyl-4-methylbenzenesulfonamide S4.**

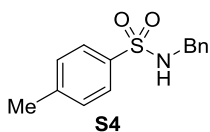

Sulfonamide **S4** was prepared from benzylamine (1.07 g, 10 mmol) and 4-methylbenzenesulfonyl chloride (2.1 g, 11 mmol) according to the general procedure and obtained in 91% yield as a white solid. <sup>1</sup>H NMR [400 MHz, δ (ppm), CDCl<sub>3</sub>]: 2.32 (s, 3 H), 4.02 (d, *J* = 6.5 Hz, 2 H), 6.74 (br t, *J* = 6.5 Hz, 1 H), 7.05–7.21 (m, 5 H), 7.27–7.31 (m, 2 H), 7.64–7.71 (m, 2 H). <sup>13</sup>C NMR [101 MHz, δ (ppm), CDCl<sub>3</sub>]: 21.7, 48.3, 128.3, 128.4, 129.1, 129.5, 130.9, 139.1, 139.2, 144.3. These data were in accordance to those reported in the literature.<sup>4</sup>

#### ***N*,4-Dimethylbenzenesulfonamide S5.**

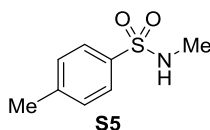

Sulfonamide **S5** was prepared from methylamine hydrochloride (0.68 g, 10 mmol) and 4-methylbenzenesulfonyl chloride (2.1 g, 11 mmol) according to the general procedure and obtained in 89% yield as brown oil. <sup>1</sup>H NMR [400 MHz, δ (ppm), CDCl<sub>3</sub>]: 2.42 (s, 3 H), 2.62 (d, *J* = 5.5 Hz, 3 H), 4.45 (br s, 1 H), 7.29–7.33 (m, 2 H), 7.70–7.76 (m, 2 H). <sup>13</sup>C NMR [101 MHz, δ (ppm), CDCl<sub>3</sub>]: 21.2, 29.5, 127.3, 129.8, 135.7, 143.3. These data were in accordance to those reported in the literature.<sup>5</sup>

### **Synthesis of 1,2-Dichlorovinyl Sulfonamides S6–S11**

**General procedure:** The sulfonamide (8 mmol, 1.0 equiv) was added dropwise at 0 °C to a suspension of sodium hydride (670 mg, 60% dispersion in mineral oil, 16.8 mmol, 2.1 equiv) in DMF (30 mL) and the reaction mixture was allowed to warm to 23 °C in 2 h. Trichloroethene (800 μL, 8.8 mmol, 1.1 equiv) was slowly added to this solution, which was after stirred at 50 °C for 16 h. After cooling to 23 °C, the reaction mixture was quenched with water (300 mL) and extracted with AcOEt (3 × 50 mL). The combined organic washings were dried over sodium sulfate, concentrated in vacuo and the crude residue was purified by column chromatography as indicated. The *E*-configuration of the obtained products including the new compounds was assigned based on the <sup>1</sup>H NMR spectra and X-ray crystallography data known from the literature.<sup>6</sup>

#### ***N*-[(*E*)-1,2-Dichlorovinyl]-*N*-phenylbenzenesulfonamide S6.**

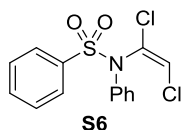

Column chromatography (heptane/ AcOEt 40:1 → 10:1) afforded product **S6** as a yellow oil (72%). *R*<sub>F</sub> (silica gel, heptane/AcOEt 10:1): 0.34 (UV, KMnO<sub>4</sub> solution). <sup>1</sup>H NMR [400 MHz, δ (ppm), CDCl<sub>3</sub>]: 6.46 (s, 1 H), 7.30–7.39 (m, 5 H), 7.43–7.50 (m, 2 H), 7.58–7.63 (m, 1 H), 7.75–7.80 (m, 2 H). <sup>13</sup>C NMR [101 MHz, δ (ppm), CDCl<sub>3</sub>]:

120.7, 128.6, 128.78, 128.79, 129.2, 129.4, 130.6, 133.6, 137.6, 138.5. **FTIR** [ $\bar{\nu}$  ( $\text{cm}^{-1}$ )]: 811, 1089, 1169, 1363, 1489, 2934, 3086. **HRMS** ( $\text{ESI}^+$ ) calcd. for  $[\text{C}_{14}\text{H}_{12}\text{Cl}_2\text{NO}_2\text{S} + \text{H}]^+$  327.9966, found 327.9954.

***N*-[(*E*)-1,2-Dichlorovinyl]-4-methyl-*N*-phenylbenzenesulfonamide **S7**.**

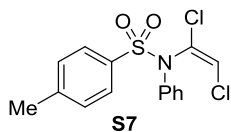

Column chromatography (heptane/AcOEt 40:1  $\rightarrow$  10:1) afforded the product **S7** as a white solid (91%).  $R_F$  (silica gel, heptane/AcOEt 1:1): 0.70 (UV,  $\text{KMnO}_4$  solution).  $^1\text{H NMR}$  [400 MHz,  $\delta$  (ppm),  $\text{CDCl}_3$ ]: 2.41 (s, 3 H), 6.46 (s, 1 H), 7.19–7.27 (m, 2 H), 7.30–7.39 (m, 5 H), 7.61–7.69 (m, 2 H).  $^{13}\text{C NMR}$  [101 MHz,  $\delta$  (ppm),  $\text{CDCl}_3$ ]: 21.7, 120.5, 128.6, 128.8, 129.1, 129.3, 129.4, 130.7, 135.6, 137.7, 144.6. These data were in accordance to those reported in the literature.<sup>7</sup>

***N*-[(*E*)-1,2-Dichlorovinyl]-4-methoxy-*N*-phenylbenzenesulfonamide **S8**.**

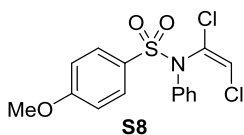

Column chromatography (heptane/AcOEt 40:1  $\rightarrow$  10:1) afforded the product **S8** as a yellow oil (87%).  $R_F$  (silica gel, heptane/AcOEt 7:1): 0.23 (UV,  $\text{KMnO}_4$  solution).  $^1\text{H NMR}$  [400 MHz,  $\delta$  (ppm),  $\text{CDCl}_3$ ]: 3.86 (s, 3 H), 6.45 (s, 1 H), 6.86–6.98 (m, 2 H), 7.29–7.41 (m, 5 H), 7.65–7.73 (m, 2 H).  $^{13}\text{C NMR}$  [101 MHz,  $\delta$  (ppm),  $\text{CDCl}_3$ ]: 55.6, 113.9, 120.4, 128.7, 129.0, 129.3, 130.0, 130.7, 130.9, 137.8, 163.6. **FTIR** [ $\bar{\nu}$  ( $\text{cm}^{-1}$ )]: 809, 1089, 1160, 1261, 1361, 1489, 1594, 2945, 3085. **HRMS** ( $\text{ESI}^+$ ) calcd. for  $[\text{C}_{15}\text{H}_{14}\text{Cl}_2\text{NO}_3\text{S} + \text{H}]^+$  358.0071, found 358.0092.

***N*-[(*E*)-1,2-Dichlorovinyl]-4-nitro-*N*-phenylbenzenesulfonamide **S9**.**

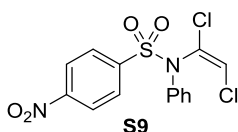

Column chromatography (heptane/AcOEt 20:1  $\rightarrow$  2:1) afforded the product **S9** as a white solid (82%).  $R_F$  (silica gel, heptane/AcOEt 10:1): 0.11 (UV,  $\text{KMnO}_4$  solution).  $^1\text{H NMR}$  [400 MHz,  $\delta$  (ppm),  $\text{CDCl}_3$ ]: 6.51 (s, 1 H), 7.31–7.49 (m, 5 H), 7.81–7.99 (m, 2 H), 8.21–8.40 (m, 2 H).  $^{13}\text{C NMR}$  [101 MHz,  $\delta$  (ppm),  $\text{CDCl}_3$ ]: 121.3, 124.0, 128.7, 129.72, 129.77, 129.83, 129.84, 137.0, 144.1, 150.6. **FTIR** [ $\bar{\nu}$  ( $\text{cm}^{-1}$ )]: 685, 738, 1094, 1171, 1348, 1530, 3082, 3102. **HRMS** ( $\text{ESI}^+$ ) calcd. for  $[\text{C}_{14}\text{H}_{11}\text{Cl}_2\text{N}_2\text{O}_4\text{S} + \text{H}]^+$  372.9817, found 372.9834.

***N*-Benzyl-*N*-[(*E*)-1,2-dichlorovinyl]-4-methylbenzenesulfonamide **S10**.**

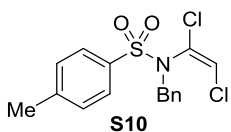

Column chromatography (heptane/AcOEt 40:1  $\rightarrow$  4:1) afforded the product **S10** as a white solid (73%).  $R_F$  (silica gel, heptane/AcOEt 10:1): 0.23 (UV,  $\text{KMnO}_4$  solution).  $^1\text{H NMR}$  [400 MHz,  $\delta$  (ppm),  $\text{CDCl}_3$ ]: 2.47 (s, 3 H), 3.72–4.81 (br s, 2 H), 6.27 (s, 1 H), 7.28–7.34 (m, 5 H), 7.32–7.37 (m, 2 H), 7.80–7.86 (m, 2 H).  $^{13}\text{C NMR}$  [101 MHz,  $\delta$  (ppm),  $\text{CDCl}_3$ ]: 21.7, 52.0, 121.7, 128.23, 128.28, 129.3, 129.4, 129.8, 133.5, 135.3, 144.7. These data were in accordance to those reported in the literature.<sup>6</sup>

### *N*-[(*E*)-1,2-Dichlorovinyl]-*N*,4-dimethylbenzenesulfonamide **S11**.

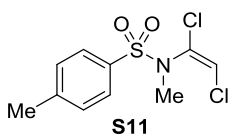

Column chromatography (heptane/ AcOEt 40:1 → 10:1) afforded the product **S11** as brown oil (64%).  $R_F$  (silica gel, heptane/AcOEt 10:1): 0.13 (UV,  $\text{KMnO}_4$  solution).  $^1\text{H NMR}$  [400 MHz,  $\delta$  (ppm),  $\text{CDCl}_3$ ]: 2.45 (s, 3 H), 2.94 (s, 3 H), 6.39 (s, 1 H), 7.31–7.37 (m, 2 H), 7.79–7.85 (m, 2 H).  $^{13}\text{C NMR}$  [101 MHz,  $\delta$  (ppm),  $\text{CDCl}_3$ ]: 21.7, 37.9, 121.4, 127.8, 129.2, 129.5, 132.4, 143.2. **FTIR** [ $\bar{\nu}$  ( $\text{cm}^{-1}$ )]: 693, 722, 1084, 1160, 1333, 1498, 2986, 3012. **HRMS** ( $\text{ESI}^+$ ) calcd. for  $[\text{C}_{10}\text{H}_{12}\text{Cl}_2\text{NO}_2\text{S} + \text{H}]^+$  279.9966, found 279.9983.

### Synthesis of Sulfonyl Ynamines **1a–k**

**Scheme 1.** Sulfonyl Ynamines **1a–k** Used in the Study

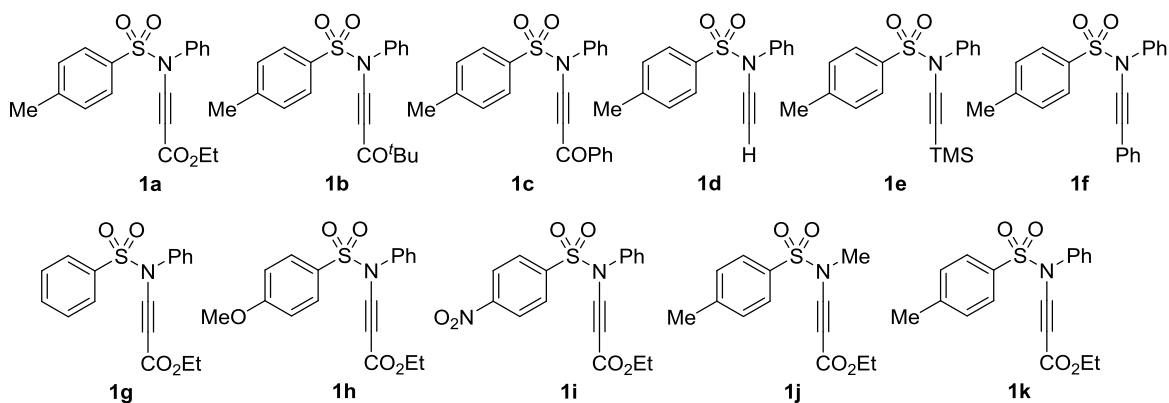

Sulfonyl ynamines **1a**, **1d**, **1e**, **1g**, **1h**, **1i**, **1j** and **1k** were prepared according to the general procedure A, **1b** and **1c** were prepared from **1d** according to the general procedure B, and **1f** was prepared from **1d** according to the general procedure C.

**General procedure A:**<sup>8</sup> *n*-Butyllithium (3.8 mL, 1.6 M in THF, 6 mmol, 2.1 equiv) was slowly added to a stirred solution of 1,2-dichlorovinyl sulfonamide (5 mmol, 1.0 equiv) in THF (30 mL) under an argon atmosphere at  $-78\text{ }^\circ\text{C}$ . After stirring for 1 h, the lithium acetylide was treated with the corresponding electrophile and stirred for 1 h at  $-78\text{ }^\circ\text{C}$ . The mixture was allowed to warm to  $23\text{ }^\circ\text{C}$  and stirred for 2–3 h. The reaction mixture was quenched with brine (100 mL) and extracted with  $\text{Et}_2\text{O}$  ( $2 \times 50\text{ mL}$ ). The combined organic washings were dried over sodium sulfate, concentrated in vacuo and the crude residue was purified by column chromatography as indicated.

**General procedure B:**<sup>9</sup> Sulfonyl ynamine **1d** (1.0 g, 3.7 mmol, 1.0 equiv), CuI (70 mg, 0.37 mmol, 0.1 equiv) and *N,N*-diisopropylethylamine (1.5 mL, 7.4 mmol, 2.0 equiv) were dissolved in chloroform (20 mL) under a nitrogen atmosphere. After 30 min, the acyl chloride (5.6 mmol, 1.5 equiv) was added, and the mixture was stirred until completion as determined by TLC. Solvent was removed in vacuo and the crude residue was purified by column chromatography as indicated.

**General procedure C:**<sup>10</sup> Sulfonyl ynamine **1d** (1.0 g, 3.7 mmol, 1.0 equiv), iodobenzene (830 mg, 4.1 mmol, 1.1 equiv) and Pd(PPh<sub>3</sub>)<sub>4</sub> (214 mg, 0.185 mmol, 0.05 equiv) were dissolved in Et<sub>3</sub>N/toluene mixture (2:1, 36 mL) under a nitrogen atmosphere. The solution was stirred at 23 °C for 10 min, and CuI (11 mg, 0.06 mmol, 0.015 equiv) was then added. After heating the reaction mixture at 60 °C for 12 h, the mixture was diluted with AcOEt, filtered through a diatomaceous earth pad, and concentrated in vacuo. The resulting crude residue was purified by silica gel flash column chromatography as indicated.

**Ethyl 3-(4-methyl-*N*-phenylbenzenesulfonamido]propanoate 1a.**

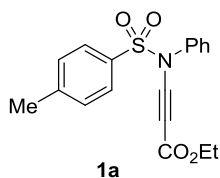

Sulfonyl ynamine **1a** was prepared according to general procedure A using 1,2-dichlorovinyl sulfonamide **S7** (1.7 g, 5.0 mmol). The lithium acetylide was treated with freshly distilled ethyl chloroformate (714 μL, 7.5 mmol) at -78 °C for 15 min and at 23 °C for 2 h. Column chromatography (heptane/AcOEt 40:1 → 10:1; silica gel was washed with 1% Et<sub>3</sub>N in heptane before being used for column chromatography) afforded the product **1a** as a white solid (82%). *R<sub>F</sub>* (silica gel, heptane/AcOEt 10:1): 0.11 (UV, KMnO<sub>4</sub> solution). <sup>1</sup>H NMR [400 MHz, δ (ppm), CDCl<sub>3</sub>]: 1.31 (t, *J* = 7.1 Hz, 3 H), 2.46 (s, 3 H), 4.24 (q, *J* = 7.1 Hz, 2 H), 7.16–7.23 (m, 2 H), 7.29–7.34 (m, 2 H), 7.34–7.38 (m, 3 H), 7.58–7.67 (m, 2 H). <sup>13</sup>C NMR [101 MHz, δ (ppm), CDCl<sub>3</sub>]: 14.2, 21.8, 61.7, 66.6, 82.2, 126.5, 128.4, 129.3, 129.6, 130.0, 133.1, 137.5, 145.9, 154.8. These data were in accordance to those reported in the literature.<sup>8</sup>

***N*-(4,4-Dimethyl-3-oxopent-1-yn-1-yl)-4-methyl-*N*-phenylbenzenesulfonamide 1b.**

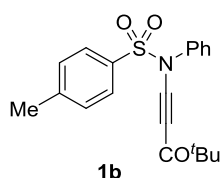

Sulfonyl ynamine **1b** was prepared according to general procedure B. The reaction with pivaloyl chloride (690 μL, 6.6 mmol) was performed at 30 °C for 18 h. Column chromatography (toluene; silica gel was washed with 1% Et<sub>3</sub>N in heptane before being used for column chromatography) afforded the product **1b** as a light yellow oil (79%). *R<sub>F</sub>* (silica gel, toluene): 0.32 (UV, KMnO<sub>4</sub> solution). <sup>1</sup>H NMR [400 MHz, δ (ppm), CDCl<sub>3</sub>]: 1.20 (s, 9 H), 2.40 (s, 3 H), 7.16–7.20 (m, 2 H), 7.24–7.28 (m, 2 H), 7.30–7.34 (m, 3 H), 7.53–7.59 (m, 2 H). <sup>13</sup>C NMR [101 MHz, δ (ppm), CDCl<sub>3</sub>]: 21.6, 26.3, 44.5, 73.6, 89.1, 126.3, 128.3, 129.1, 129.3, 129.7, 133.2, 127.4, 145.6, 193.2. These data were in accordance to those reported in the literature.<sup>9</sup>

**4-Methyl-*N*-(3-oxo-3-phenylprop-1-yn-1-yl)-*N*-phenylbenzenesulfonamide 1c.**

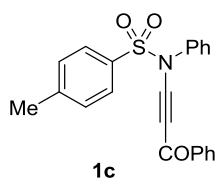

Sulfonyl ynamine **1c** was prepared according to general procedure B. The reaction with benzoyl chloride (767 μL, 6.6 mmol) was performed at 30 °C for 24 h. Column chromatography (heptane/AcOEt 20:1 → 10:1; silica gel was washed with 1% Et<sub>3</sub>N in heptane before being used for column chromatography) afforded the product **1c** as a light yellow oil (86%). *R<sub>F</sub>* (silica gel, heptane/AcOEt 10:1): 0.33 (UV, KMnO<sub>4</sub> solution). <sup>1</sup>H NMR [400 MHz, δ (ppm), CDCl<sub>3</sub>]: 2.42 (s, 3 H), 7.25–7.29 (m, 4 H), 7.36–7.41



(m, 3 H), 7.47–7.55 (m, 2 H), 7.60–7.65 (m, 3 H), 8.14–8.26 (m, 2 H).  $^{13}\text{C}$  NMR [101 MHz,  $\delta$  (ppm),  $\text{CDCl}_3$ ]: 21.7, 74.9, 90.2, 126.4, 128.2, 128.7, 129.2, 129.2, 129.5, 129.9, 132.9, 133.5, 136.9, 137.1, 145.9, 176.8. These data were in accordance to those reported in the literature.<sup>9</sup>

#### *N*-Ethyneyl-4-methyl-*N*-phenylbenzenesulfonamide **1d**.

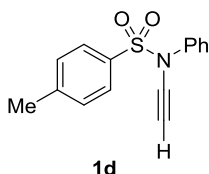

Sulfonyl ynamine **1d** was prepared according to general procedure A using 1,2-dichlorovinyl sulfonamide **S7** (1.7 g, 5.0 mmol). The lithium acetylide was treated with water (10 mL) and the resulting mixture was stirred at 23 °C for 2 h. Column chromatography (heptane/AcOEt 20:1 → 10:1; silica gel was washed with 1%  $\text{Et}_3\text{N}$  in heptane before being used for column chromatography) afforded the product **1d** as a light yellow oil (81%).  $R_F$  (silica gel, heptane/AcOEt 10:1): 0.18 (UV,  $\text{KMnO}_4$  solution).  $^1\text{H}$  NMR [400 MHz,  $\delta$  (ppm),  $\text{CDCl}_3$ ]: 2.44 (s, 3 H), 2.83 (s, 1 H), 7.23–7.34 (m, 7 H), 7.56–7.61 (m, 2 H).  $^{13}\text{C}$  NMR [101 MHz,  $\delta$  (ppm),  $\text{CDCl}_3$ ]: 21.7, 59.1, 75.8, 126.2, 128.2, 128.3, 129.0, 129.4, 132.7, 138.4, 145.0. These data were in accordance to those reported in the literature.<sup>11</sup>

#### 4-Methyl-*N*-phenyl-*N*-[(trimethylsilyl)ethynyl]benzenesulfonamide **1e**.

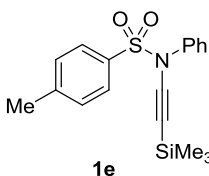

Sulfonyl ynamine **1e** was prepared according to general procedure A using 1,2-dichlorovinyl sulfonamide **S7** (1.7 g, 5.0 mmol). The lithium acetylide was treated with trimethylsilyl chloride (952  $\mu\text{L}$ , 7.5 mmol) at  $-78$  °C for 15 min and at 23 °C for 2 h. Column chromatography (heptane/AcOEt 20:1; silica gel was washed with 1%  $\text{Et}_3\text{N}$  in heptane before being used for column chromatography) afforded the product **1e** as a white solid (52%).  $R_F$  (silica gel, heptane/AcOEt 10:1): 0.27 (UV,  $\text{KMnO}_4$  solution).  $^1\text{H}$  NMR [400 MHz,  $\delta$  (ppm),  $\text{CDCl}_3$ ]: 0.17 (s, 9 H), 2.45 (s, 3 H), 7.21–7.25 (m, 2 H), 7.26–7.30 (m, 2 H), 7.30–7.36 (m, 3 H), 7.54–7.60 (m, 2 H).  $^{13}\text{C}$  NMR [101 MHz,  $\delta$  (ppm),  $\text{CDCl}_3$ ]: 0.16, 21.9, 73.4, 93.2, 126.3, 128.3, 128.6, 129.2, 129.5, 133.0, 138.7, 145.1. FTIR [ $\bar{\nu}$  ( $\text{cm}^{-1}$ )]: 752, 834, 902, 1056, 1168, 1372, 1476, 1592, 2137, 2161, 2887, 3034. HRMS (ESI<sup>+</sup>) calcd. for [ $\text{C}_{18}\text{H}_{22}\text{NO}_2\text{SSi} + \text{H}$ ]<sup>+</sup> 344.1141, found 344.1134.

#### 4-Methyl-*N*-phenyl-*N*-(phenylethynyl)benzenesulfonamide **1f**.

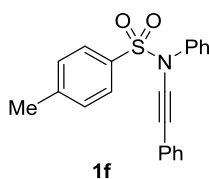

Sulfonyl ynamine **1f** was prepared according to general procedure C. Column chromatography (heptane/AcOEt 20:1 → 10:1; silica gel was washed with 1%  $\text{Et}_3\text{N}$  in heptane before being used for column chromatography) afforded the product **1f** as a light yellow solid (80%).  $R_F$  (silica gel, heptane/AcOEt 10:1): 0.27 (UV,  $\text{KMnO}_4$  solution).  $^1\text{H}$  NMR [400 MHz,  $\delta$  (ppm),  $\text{CDCl}_3$ ]: 2.45 (s, 3 H), 7.27–7.36 (m, 9 H), 7.36–7.42 (m, 3 H), 7.61–7.65 (m, 2 H).  $^{13}\text{C}$  NMR [101 MHz,  $\delta$  (ppm),  $\text{CDCl}_3$ ]: 21.7, 70.6, 83.2, 122.7, 126.5, 126.3, 128.1, 128.32, 128.34, 129.0, 129.5, 131.4, 132.9, 139.0, 145.1. These data were in accordance to those reported in the literature.<sup>12</sup>

### Ethyl 3-(*N*-phenylbenzenesulfonamido)propanoate **1g**.

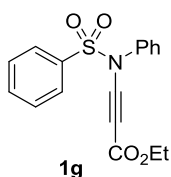

Sulfonyl ynamine **1g** was prepared according to general procedure A using 1,2-dichlorovinyl sulfonamide **S6** (1.6 g, 5.0 mmol). The lithium acetylide was treated with freshly distilled ethyl chloroformate (714  $\mu\text{L}$ , 7.5 mmol) at  $-78\text{ }^\circ\text{C}$  for 15 min and at  $23\text{ }^\circ\text{C}$  for 2 h. Column chromatography (toluene; silica gel was washed with 1%  $\text{Et}_3\text{N}$  in heptane before being used for column chromatography) afforded the product **1g** as a white solid (74%).  $R_f$  (silica gel, toluene): 0.35 (UV,  $\text{KMnO}_4$  solution).  $^1\text{H NMR}$  [400 MHz,  $\delta$  (ppm),  $\text{CDCl}_3$ ]: 1.31 (t,  $J = 7.1$  Hz, 3 H), 4.24 (q,  $J = 7.1$  Hz, 2 H), 7.14–7.22 (m, 2 H), 7.30–7.41 (m, 3 H), 7.49–7.58 (m, 2 H), 7.64–7.73 (m, 1 H), 7.74–7.80 (m, 2 H).  $^{13}\text{C NMR}$  [101 MHz,  $\delta$  (ppm),  $\text{CDCl}_3$ ]: 14.2, 61.8, 66.5, 81.9, 126.6, 128.3, 129.27, 129.29, 129.5, 134.6, 135.8, 137.0, 154.0. **FTIR** [ $\bar{\nu}$  ( $\text{cm}^{-1}$ )]: 685, 726, 1088, 1123, 1204, 1372, 1702, 2218, 2982. **HRMS** ( $\text{ESI}^+$ ) calcd. for  $\text{C}_{17}\text{H}_{16}\text{NO}_4\text{S}$  [ $\text{M} + \text{H}$ ] $^+$  330.0800, found 330.0812.

### Ethyl 3-(4-methoxy-*N*-phenylbenzenesulfonamido)propanoate **1h**.

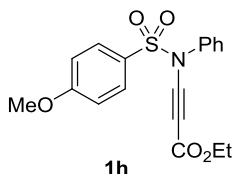

Sulfonyl ynamine **1h** was prepared according to general procedure A using 1,2-dichlorovinyl sulfonamide **S8** (1.8 g, 5.0 mmol). The lithium acetylide was treated with freshly distilled ethyl chloroformate (714  $\mu\text{L}$ , 7.5 mmol) at  $-78\text{ }^\circ\text{C}$  for 15 min and at  $23\text{ }^\circ\text{C}$  for 2 h. Column chromatography (toluene; silica gel was washed with 1%  $\text{Et}_3\text{N}$  in heptane before being used for column chromatography) afforded the product **1h** as colorless oil (84%).  $R_f$  (silica gel, toluene): 0.25 (UV,  $\text{KMnO}_4$  solution).  $^1\text{H NMR}$  [400 MHz,  $\delta$  (ppm),  $\text{CDCl}_3$ ]: 1.30 (t,  $J = 7.1$  Hz, 3 H), 3.88 (s, 3 H), 4.23 (q,  $J = 7.1$  Hz, 2 H), 6.91–7.03 (m, 2 H), 7.15–7.24 (m, 2 H), 7.3–7.40 (m, 3 H), 7.64–7.73 (m, 2 H).  $^{13}\text{C NMR}$  [101 MHz,  $\delta$  (ppm),  $\text{CDCl}_3$ ]: 14.2, 55.8, 61.7, 66.6, 82.5, 114.4, 126.4, 127.2, 129.2, 129.5, 130.6, 137.2, 154.1, 164.4. **FTIR** [ $\bar{\nu}$  ( $\text{cm}^{-1}$ )]: 689, 1087, 1123, 1371, 1496, 1593, 1702, 2216, 2981. **HRMS** ( $\text{ESI}^+$ ) calcd. for  $[\text{C}_{18}\text{H}_{18}\text{NO}_5\text{S} + \text{H}]^+$  360.0906, found 360.0922.

### Ethyl 3-(4-nitro-*N*-phenylbenzenesulfonamido)propanoate **1i** and ethyl 3,3-bis(4-nitro-*N*-phenylbenzenesulfonamido)acrylate **15**.

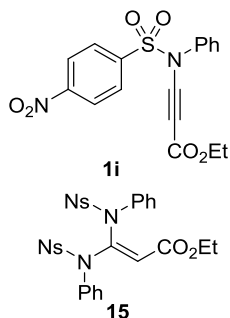

Sulfonyl ynamine **1i** and compound **15** were prepared according to general procedure A using 1,2-dichlorovinyl sulfonamide **S9** (1.9 g, 5.0 mmol). The lithium acetylide was treated with freshly distilled ethyl chloroformate (714  $\mu\text{L}$ , 7.5 mmol) at  $-78\text{ }^\circ\text{C}$  for 15 min and at  $23\text{ }^\circ\text{C}$  for 3 h. Column chromatography (toluene; silica gel was washed with 1%  $\text{Et}_3\text{N}$  in heptane before being used for column chromatography) afforded the product **1i** (42%) and product **15** (41%) as white solids. Product **15** was a common side product during the course of the reaction.  $^{13}\text{C}$  Compound **1i**:  $R_f$  (silica gel, toluene): 0.33 (UV,  $\text{KMnO}_4$  solution).  $^1\text{H NMR}$  [400 MHz,  $\delta$

(ppm), CDCl<sub>3</sub>): 1.32 (t, *J* = 7.1 Hz, 3 H), 4.25 (q, *J* = 7.1 Hz, 2 H), 7.17–7.23 (m, 2 H), 7.36–7.46 (m, 3 H), 7.92–8.00 (m, 2 H), 8.33–8.42 (m, 2 H). <sup>13</sup>C NMR [101 MHz, δ (ppm), CDCl<sub>3</sub>): 14.1, 62.0, 66.7, 80.4, 124.5, 126.5, 129.7, 129.81, 129.84, 136.5, 140.9, 150.7, 153.6. FTIR [ $\bar{\nu}$  (cm<sup>-1</sup>): 690, 740, 854, 1086, 1126, 1184, 1206, 1348, 1533, 1593, 1706, 2223, 2925, 3107. HRMS (ESI<sup>+</sup>) calcd. for [C<sub>17</sub>H<sub>15</sub>N<sub>2</sub>O<sub>6</sub>S + H]<sup>+</sup> 375.0651, found 375.0659. Compound **15**: *R<sub>F</sub>* (silica gel, toluene): 0.07 (UV, KMnO<sub>4</sub> solution). <sup>1</sup>H NMR [400 MHz, δ (ppm), CDCl<sub>3</sub>): 1.41 (t, *J* = 7.1 Hz, 3 H), 4.33 (q, *J* = 7.1 Hz, 2 H), 6.14 (s, 1 H), 7.11–7.16 (m, 2 H), 7.20–7.23 (m, 2 H), 7.24–7.27 (m, 2 H), 7.33–7.38 (m, 2 H), 7.40–7.45 (m, 2 H), 7.45–7.50 (m, 3 H), 7.52–7.57 (m, 1 H), 7.93–8.00 (m, 2 H), 8.09–8.18 (m, 2 H). <sup>13</sup>C NMR [101 MHz, δ (ppm), CDCl<sub>3</sub>): 14.1, 61.6, 110.0, 117.5, 123.4, 124.1, 129.4, 129.6, 129.7, 129.93, 129.97, 129.99, 130.0, 136.0, 136.3, 139.9, 143.4, 144.2, 149.9, 150.4, 163.9. FTIR [ $\bar{\nu}$  (cm<sup>-1</sup>): 694, 740, 855, 1086, 1139, 1172, 1202, 1350, 1531, 1720, 3106. HRMS (ESI<sup>+</sup>) calcd. for [C<sub>29</sub>H<sub>25</sub>N<sub>4</sub>O<sub>10</sub>S<sub>2</sub> + H]<sup>+</sup> 653.1012, found 653.1034.

### Ethyl 3-(*N*,4-dimethylbenzenesulfonamido)propanoate **1j**.

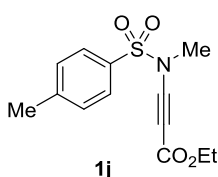

Sulfonyl ynamine **1j** was prepared according to general procedure A using 1,2-dichlorovinyl sulfonamide **S11** (1.4 g, 5.0 mmol). The lithium acetylide was treated with freshly distilled ethyl chloroformate (714 μL, 7.5 mmol) at -78 °C for 15 min and at 23 °C for 2 h. Column chromatography (heptane/AcOEt 20:1 → 10:1; silica gel was washed with 1% Et<sub>3</sub>N in heptane before being used for column chromatography) afforded the product **1j** as a white solid (71%). *R<sub>F</sub>* (silica gel, heptane/AcOEt 1:1): 0.6 (UV, KMnO<sub>4</sub> solution). <sup>1</sup>H NMR [400 MHz, δ (ppm), CDCl<sub>3</sub>): 1.31 (t, *J* = 7.1 Hz, 3 H), 2.47 (s, 3 H), 3.17 (s, 3 H), 4.23 (q, *J* = 7.1 Hz, 2 H), 7.35–7.44 (m, 2 H), 7.78–7.92 (m, 2 H). <sup>13</sup>C NMR [101 MHz, δ (ppm), CDCl<sub>3</sub>): 14.2, 21.8, 38.5, 61.6, 66.0, 83.5, 128.0, 130.2, 133.0, 145.8, 154.1. These data were in accordance to those reported in the literature.<sup>14</sup>

### Ethyl 3-(*N*-benzyl-4-methylbenzenesulfonamido)propanoate **1k**.

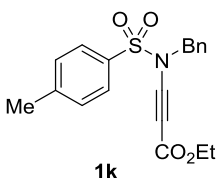

Sulfonyl ynamine **1k** was prepared according to general procedure A using 1,2-dichlorovinyl sulfonamide **S10** (1.8 g, 5.0 mmol). The lithium acetylide was treated with freshly distilled ethyl chloroformate (714 μL, 7.5 mmol) at -78 °C for 15 min and at 23 °C for 2 h. Column chromatography (heptane/AcOEt 40:1 → 10:1; silica gel was washed with 1% Et<sub>3</sub>N in heptane before being used for column chromatography) afforded the product **1k** as a white solid (87%). *R<sub>F</sub>* (silica gel, heptane/AcOEt 10:1): 0.17 (UV, KMnO<sub>4</sub> solution). <sup>1</sup>H NMR [400 MHz, δ (ppm), CDCl<sub>3</sub>): 1.28 (t, *J* = 7.1 Hz, 3 H), 2.44 (s, 3 H), 4.18 (q, *J* = 7.1 Hz, 2 H), 4.62 (s, 2 H), 7.24–7.33 (m, 7 H), 7.68–7.75 (m, 2 H). <sup>13</sup>C NMR [101 MHz, δ (ppm), CDCl<sub>3</sub>): 14.2, 21.6, 55.3, 61.4, 68.1, 82.5, 127.6, 128.5, 128.6, 129.3, 129.7, 133.5, 134.1, 145.4, 153.9. These data were in accordance to those reported in the literature.<sup>7</sup>

## Optimization Studies for Intramolecular Hydroarylation of Sulfonyl Ynamine **1a**

**Table 1.** Screening of the Reaction Conditions

| Entry                | Temperature (°C) | Additive           | Ratio of products (%) <sup>a</sup> |           |          |          |          | <i>E/Z</i> -Ratio <sup>a</sup> | Yield ( <i>E</i> )- <b>2a</b> (%) <sup>b</sup> |
|----------------------|------------------|--------------------|------------------------------------|-----------|----------|----------|----------|--------------------------------|------------------------------------------------|
|                      |                  |                    | <b>1a</b>                          | <b>2a</b> | <b>3</b> | <b>4</b> | <b>5</b> |                                |                                                |
| <b>1</b>             | 100              | –                  | 27                                 | 35        | 33       | 3        | 2        | 82:18                          | 21                                             |
| <b>2<sup>c</sup></b> | 100              | –                  | 8                                  | 42        | 46       | 2        | 2        | 83:17                          | 23                                             |
| <b>3</b>             | 80               | –                  | 62                                 | 12        | 26       | 0        | 0        | n.d.                           | <5                                             |
| <b>4</b>             | 120              | –                  | 6                                  | 20        | 63       | 11       | 0        | 82:18                          | 9                                              |
| <b>5</b>             | 150              | –                  | 6                                  | 18        | 59       | 17       | 0        | n.d.                           | <5                                             |
| <b>6</b>             | 100              | NaOAc <sup>d</sup> | 28                                 | 14        | 58       | 0        | 0        | 85:15                          | 8                                              |
| <b>7</b>             | 100              | AcOH               | 21                                 | 22        | 54       | 0        | 3        | 63:37                          | 11                                             |
| <b>8</b>             | 100              | Tf <sub>2</sub> NH | 3                                  | 9         | 88       | 0        | 0        | n.d.                           | <5                                             |
| <b>9</b>             | 100              | Zn                 | 23                                 | 37        | 38       | 2        | 0        | 85:15                          | 20                                             |

**Conditions:** **1a** (1.0 mmol), Pd(OAc)<sub>2</sub> (5 mol %), additive (10 mol %), PhMe (10.0 mL), 18 h. <sup>a</sup>Based on the <sup>1</sup>H NMR spectrum of the crude. <sup>b</sup>Isolated yield. <sup>c</sup>10 mol % of Pd(OAc)<sub>2</sub> was used. <sup>d</sup>NaOAc (2.0 equiv).

**Table 2.** Screening of the Ligand

| Entry | Ligand                         | Additive | Ratio of products (%) <sup>a</sup> |           |          |          |          | <i>E/Z</i> -Ratio <sup>a</sup> | Yield ( <i>E</i> )- <b>2a</b> (%) <sup>b</sup> |
|-------|--------------------------------|----------|------------------------------------|-----------|----------|----------|----------|--------------------------------|------------------------------------------------|
|       |                                |          | <b>1a</b>                          | <b>2a</b> | <b>3</b> | <b>4</b> | <b>5</b> |                                |                                                |
| 1     | PPh <sub>3</sub>               | Zn       | 15                                 | 38        | 38       | 9        | 0        | 92:8                           | 20                                             |
| 2     | PPh <sub>3</sub>               | AcOH     | 34                                 | 23        | 39       | 0        | 4        | 74:26                          | 13                                             |
| 3     | dppp                           | Zn       | 12                                 | 30        | 53       | 3        | 2        | 86:14                          | 16                                             |
| 4     | PCy <sub>3</sub>               | –        | 13                                 | 48        | 36       | 0        | 3        | 90:10                          | 27                                             |
| 5     | PCy <sub>3</sub>               | –        | 9                                  | 34        | 52       | 0        | 5        | 90:10                          | 22                                             |
| 6     | PCy <sub>3</sub>               | Zn       | 16                                 | 48        | 36       | 0        | 0        | 89:11                          | 23                                             |
| 7     | P( <i>p</i> -tol) <sub>3</sub> | –        | 10                                 | 51        | 35       | 0        | 4        | 98:2                           | 37                                             |
| 8     | P( <i>p</i> -tol) <sub>3</sub> | Zn       | 15                                 | 53        | 31       | 0        | 1        | 95:5                           | 34                                             |
| 9     | P( <i>o</i> -tol) <sub>3</sub> | –        | 12                                 | 48        | 35       | 0        | 5        | 90:10                          | 32                                             |
| 10    | P( <i>o</i> -tol) <sub>3</sub> | Zn       | 16                                 | 43        | 41       | 0        | 0        | 90:10                          | 26                                             |

**Conditions:** **1a** (1.0 mmol), Pd(OAc)<sub>2</sub> (5 mol %), ligand (10 mol %), additive (10 mol %), PhMe (10.0 mL), 18 h.  
<sup>a</sup>Based on the <sup>1</sup>H NMR spectrum of the crude. <sup>b</sup>Isolated yield.

**Table 3.** Screening of the Catalyst

| Entry          | Catalyst                           | Temperature (°C) | ratio of products (%) <sup>a</sup> |           |          |          |          | <i>E/Z</i> -Ratio <sup>a</sup> | Yield ( <i>E</i> )- <b>2a</b> (%) <sup>b</sup> |
|----------------|------------------------------------|------------------|------------------------------------|-----------|----------|----------|----------|--------------------------------|------------------------------------------------|
|                |                                    |                  | <b>1a</b>                          | <b>2a</b> | <b>3</b> | <b>4</b> | <b>5</b> |                                |                                                |
| 1              | –                                  | 100              | 100                                | –         | –        | –        | –        | n.d.                           | n.d.                                           |
| 2              | Pd(PPh <sub>3</sub> ) <sub>4</sub> | 100              | 30                                 | 10        | 58       | 2        | 0        | 90:10                          | 7                                              |
| 3 <sup>c</sup> | Pd(PPh <sub>3</sub> ) <sub>4</sub> | 100              | 43                                 | 23        | 17       | 3        | 14       | 92:8                           | 14                                             |
| 4              | AgOTf                              | 23               | 10                                 | 0         | 0        | 48       | 0        | n.d.                           | n.d.                                           |
| 5              | Tf <sub>2</sub> NH                 | 23               | 100                                | 0         | 0        | 0        | 0        | n.d.                           | n.d.                                           |
| 6              | ClAu(PPh <sub>3</sub> )            | 100              | unidentified products              |           |          |          |          | n.d.                           | n.d.                                           |

**Conditions:** **1a** (1.0 mmol), Pd(OAc)<sub>2</sub> (5 mol %), ligand (10 mol %), additive (10 mol %), PhMe (10.0 mL), 18 h.  
<sup>a</sup>Based on the <sup>1</sup>H NMR spectrum of the crude. <sup>b</sup>Isolated yield. <sup>c</sup>AcOH (10 mol %) was used.

**Ethyl (*E*)-2-(5-methyl-1,1-dioxo-2-phenyl-1,2-benzothiazol-3(*2H*)-ylidene)acetate (*E*)-2a.**

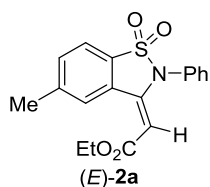

$R_F$  (silica gel, toluene): 0.33 (UV,  $\text{KMnO}_4$  solution).  $^1\text{H NMR}$  [400 MHz,  $\delta$  (ppm),  $\text{CDCl}_3$ ]: 1.26 (t,  $J = 7.1$  Hz, 3 H), 2.57 (s, 3 H), 4.18 (q,  $J = 7.1$  Hz, 2 H), 5.11 (s, 1 H), 7.47–7.51 (m, 2 H), 7.54–7.62 (m, 4 H), 7.82 (d,  $J = 7.9$  Hz, 1 H), 9.23 (quint,  $J = 0.8$  Hz, 1 H).  $^{13}\text{C NMR}$  [101 MHz,  $\delta$  (ppm),  $\text{CDCl}_3$ ]: 14.2, 22.2, 60.5, 97.0, 120.9, 127.4, 129.8, 130.36, 130.39, 130.43, 130.5, 131.0, 133.1, 144.8, 146.2, 166.1. **FTIR** [ $\bar{\nu}$  ( $\text{cm}^{-1}$ )]: 714, 902, 1089, 1174, 1302, 1512, 1635, 1737, 2992. **HRMS** ( $\text{ESI}^+$ ) calcd. for  $[\text{C}_{18}\text{H}_{18}\text{NO}_4\text{S} + \text{H}]^+$  344.0957, found 344.0966.

**Ethyl (*Z*)-2-(5-methyl-1,1-dioxo-2-phenyl-1,2-benzothiazol-3(*2H*)-ylidene)acetate (*Z*)-2a.**

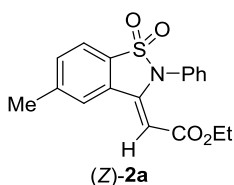

$R_F$  (silica gel, toluene): 0.28 (UV,  $\text{KMnO}_4$  solution).  $^1\text{H NMR}$  [400 MHz,  $\delta$  (ppm),  $\text{CDCl}_3$ ]: 1.01 (t,  $J = 7.1$  Hz, 3 H), 2.54 (s, 3 H), 3.66 (q,  $J = 7.1$  Hz, 2 H), 5.83 (s, 1 H), 7.36–7.49 (m, 5 H), 7.55 (m,  $J = 8.0, 1.2, 0.6$  Hz, 1 H), 7.62 (quint,  $J = 0.6$  Hz, 1 H), 7.79 (d,  $J = 8.0$  Hz, 1 H).  $^{13}\text{C NMR}$  [101 MHz,  $\delta$  (ppm),  $\text{CDCl}_3$ ]: 13.9, 22.0, 60.4, 93.0, 121.5, 122.0, 126.9, 128.6, 128.9, 129.5, 130.2, 133.1, 134.9, 140.2, 144.9, 164.0. **FTIR** [ $\bar{\nu}$  ( $\text{cm}^{-1}$ )]: 693, 907, 1082, 1145, 1266, 1327, 1494, 1635, 1708, 3029. **HRMS** ( $\text{ESI}^+$ ) calcd. for  $[\text{C}_{18}\text{H}_{18}\text{NO}_4\text{S} + \text{H}]^+$  344.0957, found 344.0943.

**4-Methyl-*N*-phenylbenzenesulfonamide 3.** The spectroscopic data were identical to those reported above.

**Ethyl 3,3-bis(4-methyl-*N*-phenylbenzenesulfonamido)acrylate 4.**

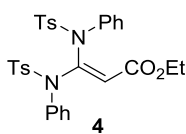

$R_F$  (silica gel, toluene): 0.06 (UV,  $\text{KMnO}_4$  solution).  $^1\text{H NMR}$  [400 MHz,  $\delta$  (ppm),  $\text{CDCl}_3$ ]: 1.39 (t,  $J = 7.1$  Hz, 3 H), 2.30 (s, 3 H), 2.38 (s, 3 H), 4.33 (q,  $J = 7.1$  Hz, 2 H), 6.09 (s, 1 H), 6.86–6.94 (m, 4 H), 7.06–7.12 (m, 2 H), 7.12–7.19 (m, 6 H), 7.26–7.33 (m, 2 H), 7.33–7.40 (m, 3 H), 7.42–7.48 (m, 1 H).  $^{13}\text{C NMR}$  [101 MHz,  $\delta$  (ppm),  $\text{CDCl}_3$ ]: 14.1, 21.5, 21.6, 61.1, 115.5, 127.3, 128.18, 128.23, 128.93, 128.97, 129.0, 129.4, 129.5, 130.0, 130.2, 135.1, 136.0, 136.8, 137.1, 140.6, 143.5, 144.3, 164.7. **FTIR** [ $\bar{\nu}$  ( $\text{cm}^{-1}$ )]: 695, 814, 1087, 1139, 1167, 1362, 1489, 1531, 1719, 2981. **HRMS** ( $\text{ESI}^+$ ) calcd. for  $[\text{C}_{31}\text{H}_{31}\text{N}_2\text{O}_6\text{S}_2 + \text{H}]^+$  591.1624, found 591.1638.

**Ethyl (*E*)-3-(4-methyl-*N*-phenylbenzenesulfonamido)acrylate 5.**

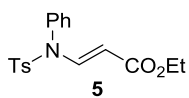

$R_F$  (silica gel, toluene): 0.12 (UV,  $\text{KMnO}_4$  solution).  $^1\text{H NMR}$  [400 MHz,  $\delta$  (ppm),  $\text{CDCl}_3$ ]: 1.24 (t,  $J = 7.1$  Hz, 3 H), 2.44 (s, 3 H), 4.14 (q,  $J = 7.1$  Hz, 2 H), 4.62 (d,  $J = 13.8$  Hz, 1 H), 6.88–6.97 (m, 2 H), 7.27–7.32 (m, 2 H), 7.35–7.45 (m, 3 H), 7.53–7.60 (m, 2 H), 8.37 (d,  $J = 13.7$  Hz, 1 H).  $^{13}\text{C NMR}$  [101 MHz,  $\delta$  (ppm),  $\text{CDCl}_3$ ]: 14.3, 21.7, 60.1, 100.0, 121.7, 127.8, 129.7, 129.86, 129.89, 134.8, 135.1, 143.9, 144.9, 167.1. **FTIR** [ $\bar{\nu}$

( $\text{cm}^{-1}$ ): 727, 906, 1089, 1170, 1368, 1624, 1737, 2245, 2981. HRMS (ESI<sup>+</sup>) calcd. for [ $\text{C}_{18}\text{H}_{20}\text{NO}_4\text{S} + \text{H}$ ]<sup>+</sup> 346.1113, found 346.1131.

### Intramolecular Hydroarylation of Sulfonyl Ynamine **1a–c** and **1g–k**

**Scheme 2.** Scope of Sulfonyl Ynamines **1a–k** and **1g–k** for Intramolecular Hydroarylation

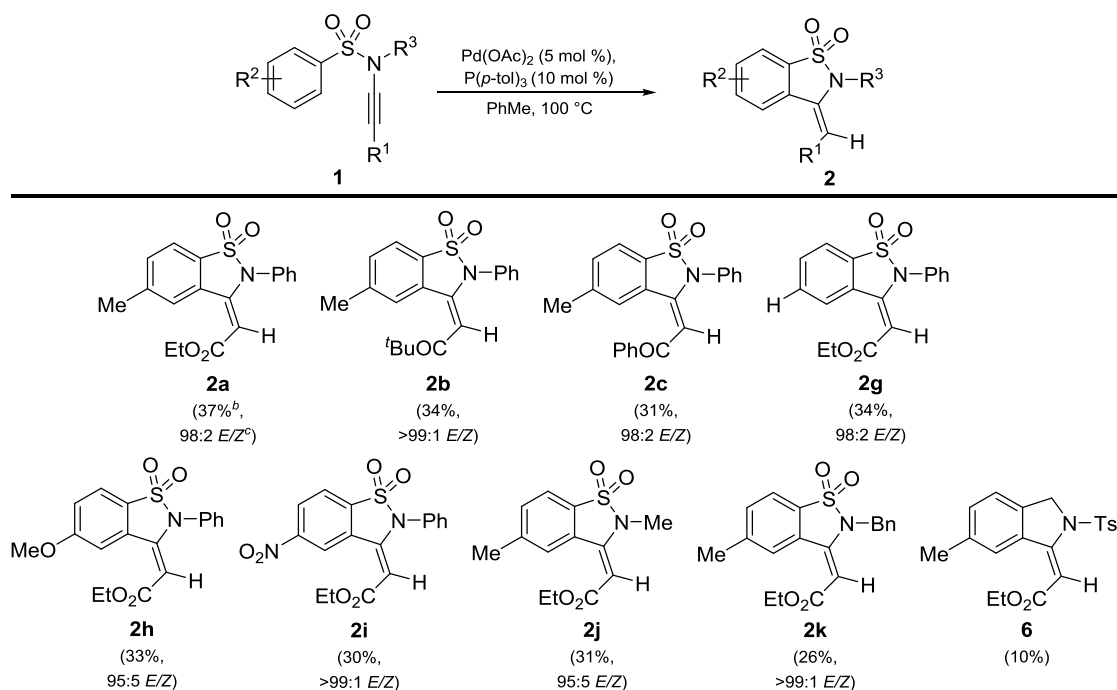

**General procedure:** Sulfonyl ynamine **1** (1.0 mmol, 1.0 equiv) was dissolved in toluene (10 mL) under a nitrogen atmosphere in a Biotage microwave vial (10.0–20.0 mL) equipped with a magnetic stirring bar.  $\text{Pd}(\text{OAc})_2$  (11 mg, 0.05 mmol, 0.05 equiv) and tri(*p*-tolyl)phosphine (30 mg, 0.1 mmol, 0.1 equiv) were added at  $23\text{ }^\circ\text{C}$ . The vial was covered with a Teflon septum and secured via a crimped aluminum cap. The reaction was irradiated in a Biotage Initiator microwave at  $100\text{ }^\circ\text{C}$  for 18 h (30 second pre-stir, Fixed Hold Time On, Low absorbance level). The reaction mixture was quenched with brine (50 mL) and extracted with  $\text{AcOEt}$  ( $2 \times 20\text{ mL}$ ). The resulting organic washings were dried over sodium sulfate, concentrated in vacuo and the crude residue was purified by column chromatography as indicated.

#### Ethyl (*E*)-2-(5-methyl-1,1-dioxo-2-phenyl-1,2-benzothiazol-3(2*H*)-ylidene)acetate (*E*)-**2a**.

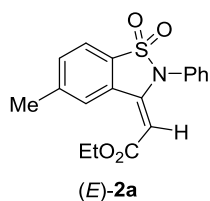

(*E*)-1,2-Benzothiazolodione **2a** was prepared according to general procedure using sulfonyl ynamine **1a** (343 mg, 1.0 mmol). Ratio *E/Z* = 98:2 was determined by <sup>1</sup>H NMR spectroscopy. Column chromatography (toluene; silica gel was washed with 1%  $\text{Et}_3\text{N}$  in heptane before being used for column chromatography) afforded product (*E*)-**2a** as a white solid (127 mg, 37%). The spectroscopic data

were identical to those reported above (see Section "Optimization Studies for Intramolecular Hydroarylation of Sulfonyl Ynamine **1a**").

**(E)-3,3-Dimethyl-1-(5-methyl-1,1-dioxo-2-phenyl-1,2-benzothiazol-3(2H)-ylidene)butan-2-one (E)-2b.**

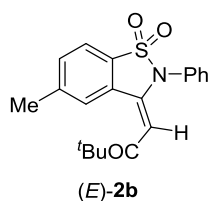

(*E*)-1,2-Benzothiazol-3(2H)-ylidene **2b** was prepared according to general procedure using sulfonyl ynamine **1b** (355 mg, 1.0 mmol). Ratio *E/Z* > 99:1 was determined by <sup>1</sup>H NMR spectroscopy. Column chromatography (toluene; silica gel was washed with 1% Et<sub>3</sub>N in heptane before being used for column chromatography) afforded the product (*E*)-**2b** as a white solid (121 mg, 34%). *R<sub>F</sub>* (silica gel, toluene): 0.28 (UV, KMnO<sub>4</sub> solution). <sup>1</sup>H NMR [400 MHz, δ (ppm), CDCl<sub>3</sub>]: 1.05 (s, 9 H), 2.57 (s, 3 H), 5.71 (s, 1 H), 7.48–7.53 (m, 2 H), 7.54–7.65 (m, 4 H), 7.82 (d, *J* = 7.9 Hz, 1 H), 9.10 (quint, *J* = 0.6 Hz, 1 H). <sup>13</sup>C NMR [101 MHz, δ (ppm), CDCl<sub>3</sub>]: 22.3, 26.8, 44.7, 101.5, 121.0, 127.8, 129.4, 130.4, 130.5, 130.6, 130.8, 130.9, 133.4, 145.1, 145.6, 204.3. FTIR [ $\bar{\nu}$  (cm<sup>-1</sup>)]: 695, 966, 1078, 1183, 1322, 1566, 1673, 2965. HRMS (ESI<sup>+</sup>) calcd. for [C<sub>20</sub>H<sub>22</sub>NO<sub>3</sub>S + H]<sup>+</sup> 356.1320, found 356.1343.

**(E)-2-(5-methyl-1,1-dioxo-2-phenyl-1,2-benzothiazol-3(2H)-ylidene)-1-phenylethan-1-one (E)-2c.**

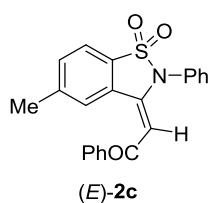

(*E*)-1,2-Benzothiazol-3(2H)-ylidene **2c** was prepared according to general procedure using sulfonyl ynamine **1c** (375 mg, 1.0 mmol). Ratio *E/Z* = 98:2 was determined by <sup>1</sup>H NMR spectroscopy. Column chromatography (toluene; silica gel was washed with 1% Et<sub>3</sub>N in heptane before being used for column chromatography) afforded the product (*E*)-**2c** as a white solid (116 mg, 31%). *R<sub>F</sub>* (silica gel, toluene): 0.31 (UV, KMnO<sub>4</sub> solution). <sup>1</sup>H NMR [400 MHz, δ (ppm), CDCl<sub>3</sub>]: 2.57 (s, 3 H), 6.09 (s, 1 H), 7.37–7.45 (m, 2 H), 7.48–7.55 (m, 1 H), 7.56–7.66 (m, 6 H), 7.72–7.79 (m, 2 H), 7.85 (d, *J* = 8.0 Hz, 1 H), 9.00 (quint, *J* = 0.5 Hz, 1 H). <sup>13</sup>C NMR [101 MHz, δ (ppm), CDCl<sub>3</sub>]: 22.2, 102.4, 121.1, 127.4, 127.7, 128.2, 128.6, 129.1, 130.5, 130.6, 130.7, 130.9, 132.8, 133.6, 139.4, 145.1, 146.4, 189.7. FTIR [ $\bar{\nu}$  (cm<sup>-1</sup>)]: 696, 959, 1185, 1323, 1565, 1653, 1724, 2922, 3064. HRMS (ESI<sup>+</sup>) calcd. for [C<sub>22</sub>H<sub>18</sub>NO<sub>3</sub>S + H]<sup>+</sup> 376.1007, found 376.1015.

**Ethyl (E)-2-(1,1-dioxo-2-phenyl-1,2-benzothiazol-3(2H)-ylidene)acetate (E)-2g.**

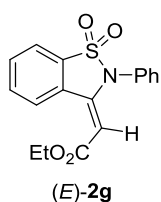

(*E*)-1,2-Benzothiazol-3(2H)-ylidene **2g** was prepared according to general procedure using sulfonyl ynamine **1g** (330 mg, 1.0 mmol). Ratio *E/Z* = 98:2 was determined by <sup>1</sup>H NMR spectroscopy. Column chromatography (toluene; silica gel was washed with 1% Et<sub>3</sub>N in heptane before being used for column chromatography) afforded the product (*E*)-**2g** as a white solid (112 mg, 34%). *R<sub>F</sub>* (silica gel, toluene): 0.31 (UV, KMnO<sub>4</sub> solution). <sup>1</sup>H NMR [400 MHz, δ (ppm), CDCl<sub>3</sub>]: 1.28 (t, *J* = 7.1 Hz, 3 H), 4.20 (q, *J* = 7.1 Hz, 2 H), 5.16 (s, 1 H), 7.46–7.56 (m, 2 H), 7.57–7.67 (m, 3 H), 7.76–7.85 (m, 2 H), 7.92–8.02 (m, 1 H), 9.44 (m, 1 H). <sup>13</sup>C NMR [101 MHz, δ (ppm), CDCl<sub>3</sub>]: 14.4, 60.7, 97.6, 121.3, 127.4,



129.9, 130.5, 130.6, 130.7, 131.2, 132.5, 133.3, 133.9, 146.2, 166.3. **FTIR** [ $\bar{\nu}$  ( $\text{cm}^{-1}$ ): 692, 910, 1045, 1099, 1157, 1186, 1324, 1619, 1708, 2925. **HRMS** ( $\text{ESI}^+$ ) calcd. for  $[\text{C}_{17}\text{H}_{16}\text{NO}_4\text{S} + \text{H}]^+$  330.0800, found 330.0827.

**Ethyl (*E*)-2-(5-methoxy-1,1-dioxo-2-phenyl-1,2-benzothiazol-3(2*H*)-ylidene)acetate (*E*)-2h.**

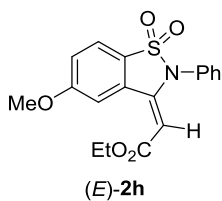

(*E*)-1,2-Benzothiazole-dione **2h** was prepared according to general procedure using sulfonyl ynamine **1h** (360 mg, 1.0 mmol). Ratio *E/Z* = 95:5 was determined by  $^1\text{H}$  NMR spectroscopy. Column chromatography (toluene; silica gel was washed with 1%  $\text{Et}_3\text{N}$  in heptane before being used for column chromatography) afforded the product (*E*)-**2h** as a white solid (119 mg, 33%).  $R_f$  (silica gel, toluene): 0.17 (UV,  $\text{KMnO}_4$  solution).  $^1\text{H}$  NMR [400 MHz,  $\delta$  (ppm),  $\text{CDCl}_3$ ]: 1.25 (t,  $J = 7.1$  Hz, 3 H), 3.98 (s, 3 H), 4.16 (q,  $J = 7.1$  Hz, 2 H), 5.12 (s, 1 H), 7.25 (dd,  $J = 8.7, 2.2$  Hz, 1 H), 7.47–7.52 (m, 2 H), 7.53–7.64 (m, 3 H), 7.83 (d,  $J = 8.6$  Hz, 1 H), 9.14 (d,  $J = 2.3$  Hz, 1 H).  $^{13}\text{C}$  NMR [101 MHz,  $\delta$  (ppm),  $\text{CDCl}_3$ ]: 14.3, 56.1, 60.5, 97.2, 113.4, 119.7, 122.4, 125.1, 129.6, 130.43, 130.49, 130.53, 131.0, 146.3, 164.0, 166.2. **FTIR** [ $\bar{\nu}$  ( $\text{cm}^{-1}$ ): 1103, 1183, 1252, 1307, 1473, 1583, 1621, 1707, 2988, 3118. **HRMS** ( $\text{ESI}^+$ ) calcd. for  $[\text{C}_{18}\text{H}_{18}\text{NO}_5\text{S} + \text{H}]^+$  360.0906, found 360.0919.

**Ethyl (*E*)-2-(5-nitro-1,1-dioxo-2-phenyl-1,2-benzothiazol-3(2*H*)-ylidene)acetate (*E*)-2i.**

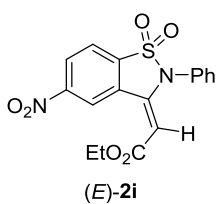

(*E*)-1,2-Benzothiazole-dione **2i** was prepared according to general procedure using sulfonyl ynamine **1i** (375 mg, 1.0 mmol). Ratio *E/Z* > 99:1 was determined by  $^1\text{H}$  NMR spectroscopy. Column chromatography (toluene; silica gel was washed with 1%  $\text{Et}_3\text{N}$  in heptane before being used for column chromatography) afforded the product (*E*)-**2i** as a white solid (113 mg, 30%).  $R_f$  (silica gel, toluene): 0.28 (UV,  $\text{KMnO}_4$  solution).  $^1\text{H}$  NMR [400 MHz,  $\delta$  (ppm),  $\text{CDCl}_3$ ]: 1.28 (t,  $J = 7.1$  Hz, 3 H), 4.24 (q,  $J = 7.1$  Hz, 2 H), 5.27 (s, 1 H), 7.46–7.56 (m, 2 H), 7.58–7.69 (m, 3 H), 8.12 (d,  $J = 8.5$  Hz, 1 H), 8.61 (dd,  $J = 8.5, 1.9$  Hz, 1 H), 10.43 (d,  $J = 1.9$  Hz, 1 H).  $^{13}\text{C}$  NMR [101 MHz,  $\delta$  (ppm),  $\text{CDCl}_3$ ]: 14.2, 61.2, 99.9, 122.5, 125.6, 127.3, 129.1, 129.6, 130.7, 130.9, 131.1, 137.6, 143.8, 151.2, 165.6. **FTIR** [ $\bar{\nu}$  ( $\text{cm}^{-1}$ ): 694, 740, 1095, 1113, 1186, 1341, 1537, 1706, 2926, 3111. **HRMS** ( $\text{ESI}^+$ ) calcd. for  $[\text{C}_{17}\text{H}_{15}\text{N}_2\text{O}_6\text{S} + \text{H}]^+$  375.0651, found 375.0667.

**Ethyl (*E*)-2-(2,5-dimethyl-1,1-dioxo-1,2-benzothiazol-3(2*H*)-ylidene)acetate (*E*)-2j.**

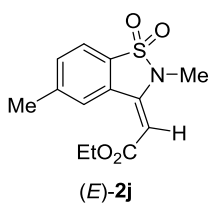

(*E*)-1,2-Benzothiazole-dione **2j** was prepared according to general procedure using sulfonyl ynamine **1j** (281 mg, 1.0 mmol). Ratio *E/Z* = 95:5 was determined by  $^1\text{H}$  NMR spectroscopy. Column chromatography (toluene; silica gel was washed with 1%  $\text{Et}_3\text{N}$  in heptane before being used for column chromatography) afforded the product (*E*)-**2j** as colorless oil (87 mg, 31%).  $R_f$  (silica gel, toluene): 0.23 (UV,  $\text{KMnO}_4$  solution).  $^1\text{H}$  NMR [400 MHz,  $\delta$  (ppm),  $\text{CDCl}_3$ ]: 1.35 (t,  $J = 7.1$  Hz, 3 H), 2.54 (s, 3

H), 3.15 (s, 3 H), 4.25 (q,  $J = 7.1$  Hz, 2 H), 5.33 (s, 1 H), 7.50 (d,  $J = 7.9$  Hz, 1 H), 7.76 (d,  $J = 7.9$  Hz, 1 H), 9.17 (s, 1 H).  $^{13}\text{C}$  NMR [101 MHz,  $\delta$  (ppm),  $\text{CDCl}_3$ ]: 14.3, 22.2, 26.5, 60.5, 95.0, 120.8, 127.9, 129.8, 130.5, 132.7, 144.8, 144.9, 166.0. FTIR [ $\bar{\nu}$  ( $\text{cm}^{-1}$ )]: 701, 823, 1039, 1137, 1159, 1315, 1619, 1708, 2982. HRMS ( $\text{ESI}^+$ ) calcd. for  $[\text{C}_{13}\text{H}_{16}\text{NO}_4\text{S} + \text{H}]^+$  282.0800, found 282.0819.

**Ethyl (*E*)-2-(2-benzyl-5-methyl-1,1-dioxo-1,2-benzothiazol-3(2*H*)-ylidene)acetate (*E*)-2k and ethyl (*E*)-2-[2-(4-methylbenzenesulfonyl)isoindolin-1-ylidene]acetate 6.**

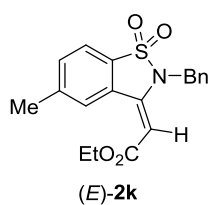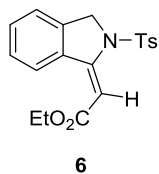

(*E*)-1,2-Benzothiazole-dione **2k** and compound **6** were prepared according to general procedure using sulfonyl ynamine **1k** (357 mg, 1.0 mmol). Ratio *E/Z* > 99:1 was determined by  $^1\text{H}$  NMR spectroscopy. Column chromatography (toluene; silica gel was washed with 1%  $\text{Et}_3\text{N}$  in heptane before being used for column chromatography) afforded the product (*E*)-**2k** as a white solid (93 mg, 26%) and product **6** as a colorless oil (36 mg, 10%). Compound (*E*)-**2k**:  $R_F$  (silica gel, toluene): 0.30 (UV,  $\text{KMnO}_4$  solution).  $^1\text{H}$  NMR [400 MHz,  $\delta$  (ppm),  $\text{CDCl}_3$ ]: 1.26 (t,  $J = 7.1$  Hz, 3 H), 2.53 (s, 3 H), 4.15 (q,  $J = 7.1$  Hz, 2 H), 4.84 (s, 2 H), 5.28 (s, 1 H), 7.27–7.33 (m, 1 H), 7.34–7.40 (m, 2 H), 7.40–7.44 (m, 2 H), 7.52 (dd,  $J = 7.9, 0.6$  Hz, 1 H), 7.81 (d,  $J = 7.9$  Hz, 1 H), 9.13 (quint,  $J = 0.6$  Hz, 1 H).  $^{13}\text{C}$  NMR [101 MHz,  $\delta$  (ppm),  $\text{CDCl}_3$ ]: 14.4, 22.4, 44.5, 60.6, 96.5, 121.0, 127.2, 127.8, 128.1, 129.1, 130.1, 130.4, 132.9, 134.1, 143.7, 145.1, 166.0. FTIR [ $\bar{\nu}$  ( $\text{cm}^{-1}$ )]: 670, 732, 831, 1136, 1168, 1311, 1626, 1706, 2986, 3098. HRMS ( $\text{ESI}^+$ ) calcd. for  $[\text{C}_{19}\text{H}_{20}\text{NO}_4\text{S} + \text{H}]^+$  358.1113, found 358.1118. Compound **6**:  $R_F$  (silica gel, toluene): 0.21 (UV,  $\text{KMnO}_4$  solution).  $^1\text{H}$  NMR [400 MHz,  $\delta$  (ppm),  $\text{CDCl}_3$ ]: 1.32 (t,  $J = 7.1$  Hz, 3 H), 2.40 (s, 3 H), 4.19 (q,  $J = 7.1$  Hz, 2 H), 5.02 (s, 2 H), 6.43 (s, 1 H), 7.28–7.39 (m, 4 H), 7.41–7.47 (m, 1 H), 7.76–7.83 (m, 2 H), 9.13 (d,  $J = 8.1$  Hz, 1 H).  $^{13}\text{C}$  NMR [101 MHz,  $\delta$  (ppm),  $\text{CDCl}_3$ ]: 14.6, 21.8, 55.4, 60.1, 96.7, 121.9, 127.7, 128.4, 128.9, 130.1, 131.3, 133.0, 134.6, 138.1, 145.1, 152.0, 167.0. FTIR [ $\bar{\nu}$  ( $\text{cm}^{-1}$ )]: 667, 800, 1089, 1165, 1344, 1620, 1705, 2922. HRMS ( $\text{ESI}^+$ ) calcd. for  $[\text{C}_{19}\text{H}_{20}\text{NO}_4\text{S} + \text{H}]^+$  358.1113, found 358.1132.

### Intramolecular Hydroarylation of **1d**, **1e** and **1f**

**Scheme 3.** Intramolecular Hydroarylation of **1d**, **1e** and **1f**

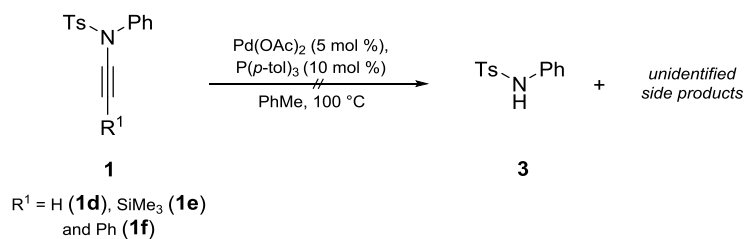

Sulfonamide ynamines **1d**, **1e** or **1f** were submitted to the reaction conditions according to general procedure.  $^1\text{H}$  NMR spectroscopy of the crude product indicated partial degradation of the starting material to 4-methyl-*N*-phenylbenzenesulfonamide **3** and additional unidentified products. The formation of products **2d**, **2e** or **2f** was not observed.

### Intramolecular Hydroarylation of Ethyl Acrylate **5**

**Scheme 4.** Intramolecular Hydroarylation of Ethyl Acrylate **5**

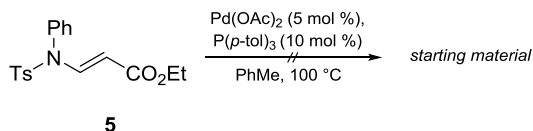

Ethyl Acrylate **5** was submitted to the reaction conditions according to general procedure.  $^1\text{H}$  NMR spectroscopy of the crude product indicated no reaction of the substrate. Ethyl acrylate **5** was recovered in 94% yield after purification on the column chromatography (toluene; silica gel was washed with 1%  $\text{Et}_3\text{N}$  in heptane before being used for column chromatography).

### Study of Equilibration between *E*- and *Z*-isomers of **2a**

**General procedure:** (*E*)-1,2-Benzothiazole-1,1-dione **2a** or (*Z*)-1,2-Benzothiazole-1,1-dione **2a** (69 mg, 0.2 mmol, 1.0 equiv) were independently dissolved in toluene (2 mL) under a nitrogen atmosphere in a Biotage microwave vial (2.0–5.0 mL) equipped with a magnetic stirring bar.  $\text{Pd}(\text{OAc})_2$  (2.2 mg, 0.01 mmol, 0.05 equiv) and tri(*p*-tolyl)phosphine (6.1 mg, 0.02 mmol, 0.1 equiv) were added at 23 °C. The vial was covered with a Teflon septum and secured via a crimped aluminum cap. The reaction was irradiated in a Biotage Initiator microwave at 100 °C for 18 h (30 second pre-stir, Fixed Hold Time On, Low absorbance level). The reaction mixture was quenched with brine (50 mL) and extracted with  $\text{AcOEt}$  (2 × 20 mL). The combined organic washings were dried over sodium sulfate, filtered off and concentrated in vacuo.  $^1\text{H}$  NMR spectroscopy of the crude product indicated a mixture of isomers with ratio *E/Z* = 85:15 (Scheme 5). Additionally, partial decomposition of the starting material was observed.

These results indicate the possible isomerization of (*E*)- and (*Z*)-isomers of **2a** under the reaction conditions used for the intramolecular hydroarylation of the ynamines.

**Scheme 5.** Equilibration of (*E*)- to (*Z*)-Isomer of 1,2-Benzothiazole-1,1-dione **2a**

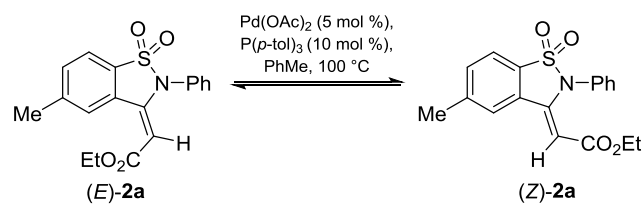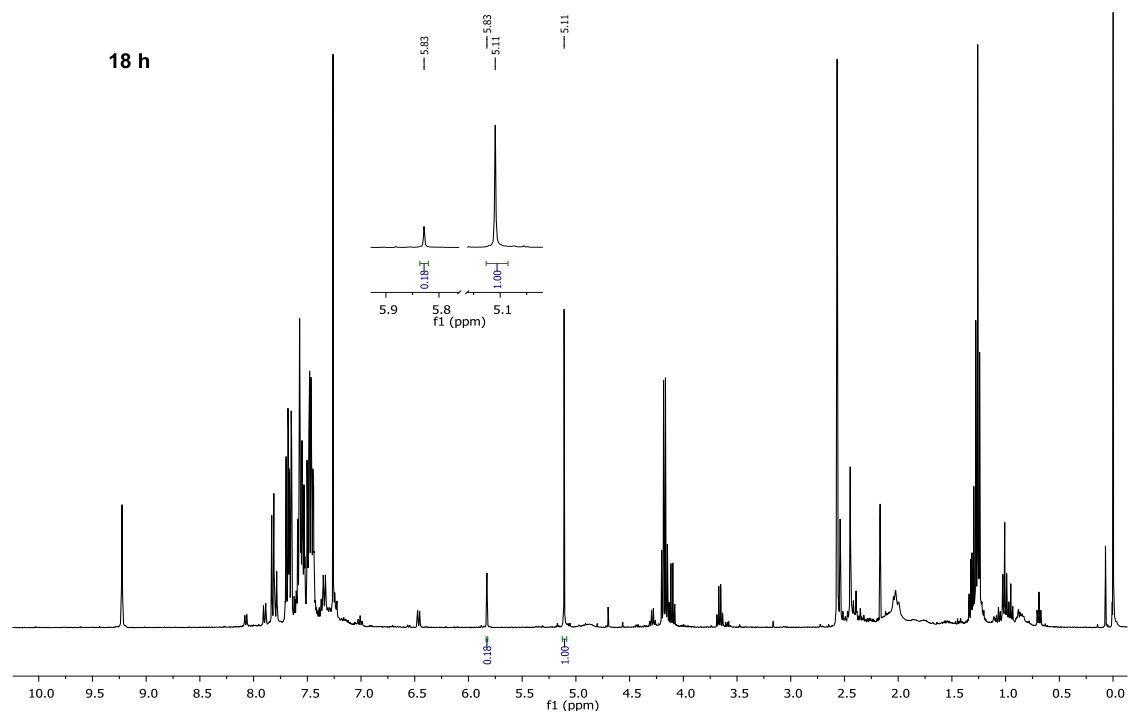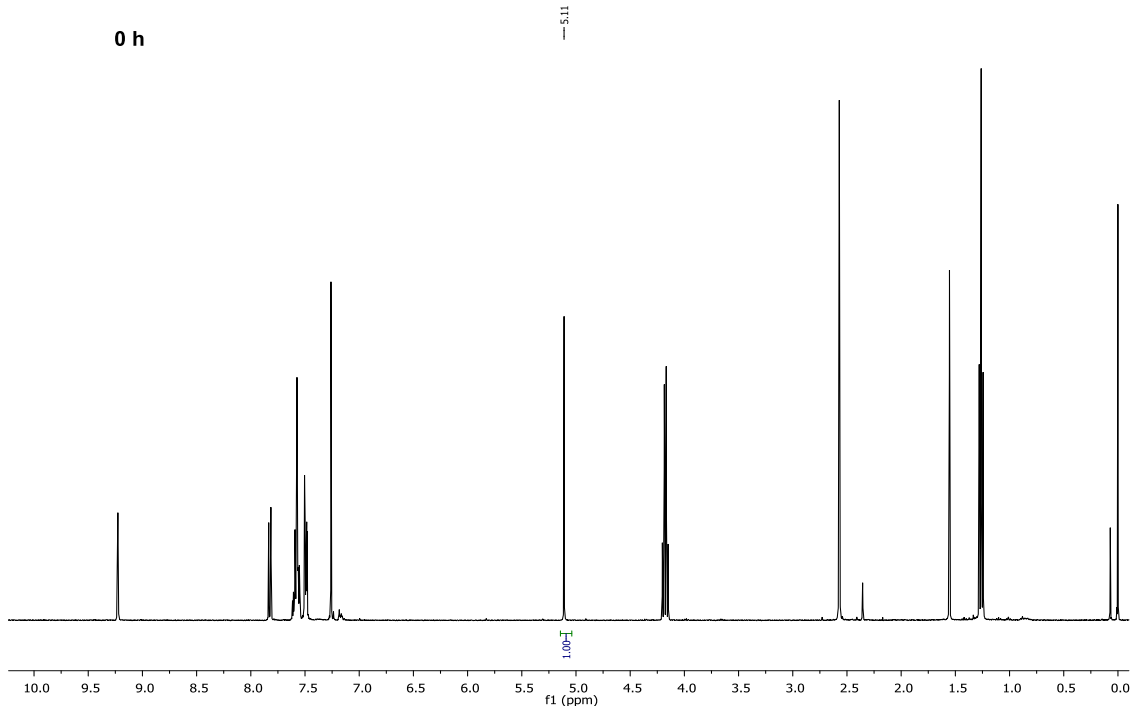

## Photochemical Rearrangement of 1,2-Benzothiazole-1,1-diones

**Scheme 6.** Scope of the Photochemical Rearrangement of 1,2-Benzothiazole-1,1-diones

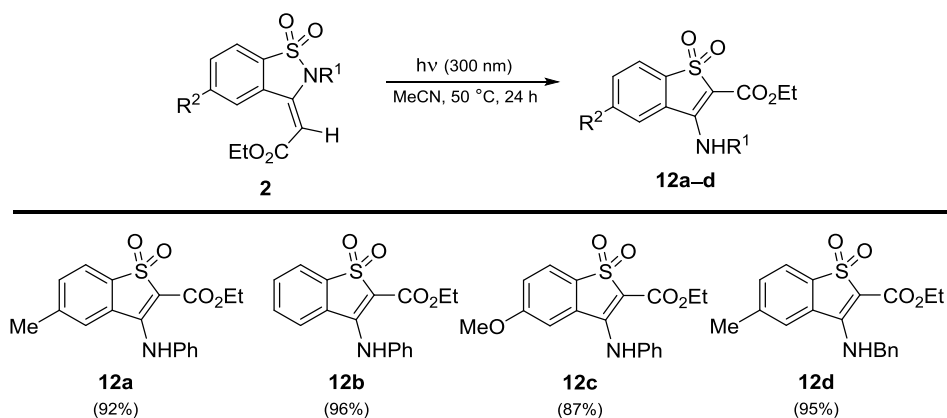

**General procedure:** To 25 mL quartz flask was added 1,2-benzothiazole-1,1-dione **2a**, **2g**, **2h** or **2k** (0.1–1.0 mmol, 1.0 equiv) in 10 mL of deoxygenated MeCN with stirring. This flask was irradiated in a Rayonet RMR-600 photochemical reactor, using eight lamps of 300 nm of wavelength for 24 h with internal temperature of 50 °C (Figure 1). After cooling to 23 °C, the solvent was removed in vacuo and the crude residue was purified by column chromatography as indicated.

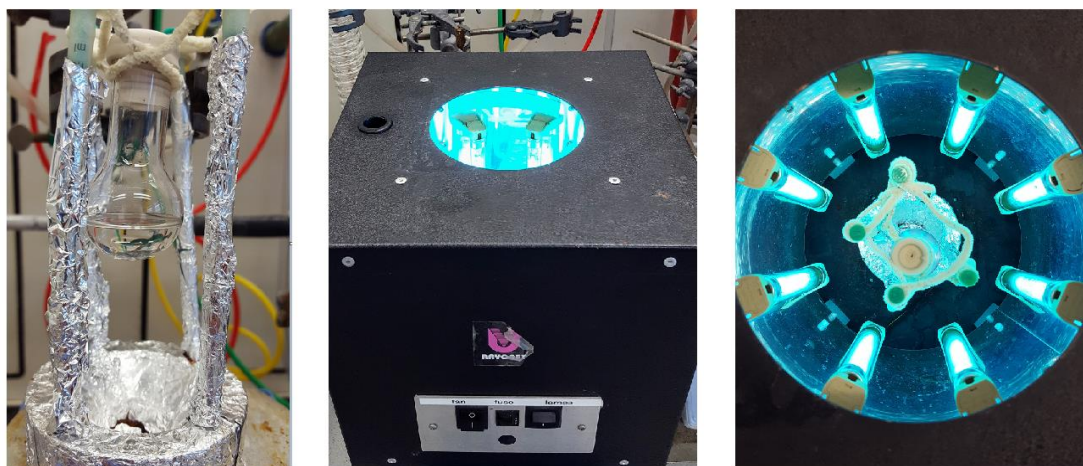

**Figure 1.** Reaction setup for the Photochemical Rearrangement

### Ethyl 5-methyl-1,1-dioxo-3-(phenylamino)-1-benzothiophene-2-carboxylate **12a**.

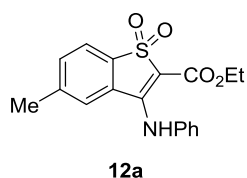

3-Amino-1-benzothiophene-1,1-dione **12a** was prepared according to general procedure using 1,2-benzothiazole-1,1-dione **2a** (343 mg, 1.0 mmol). Column chromatography (toluene; silica gel was washed with 1% Et<sub>3</sub>N in heptane before being used for column chromatography) afforded the product **12a** as a white solid (316 mg, 92%). *R<sub>F</sub>* (silica gel, toluene): 0.22 (UV, KMnO<sub>4</sub> solution). <sup>1</sup>H NMR [400 MHz, δ (ppm), CDCl<sub>3</sub>]: 1.45 (t, *J* = 7.1 Hz, 3 H), 2.12 (s, 3 H), 4.43 (q, *J* = 7.1 Hz, 2 H), 6.40 (quint, *J* = 0.5 Hz,

1 H), 7.30–7.34 (m, 2 H), 7.39 (ddd,  $J = 7.8, 1.3, 0.7$  Hz, 1 H), 7.44–7.54 (m, 3 H), 7.71 (d,  $J = 7.8$  Hz, 1 H), 10.43 (bs, 1 H).  $^{13}\text{C NMR}$  [101 MHz,  $\delta$  (ppm),  $\text{CDCl}_3$ ]: 14.4, 21.7, 61.1, 100.1, 121.2, 125.9, 126.5, 127.0, 128.6, 129.8, 133.6, 137.4, 138.2, 142.8, 155.0, 164.5. **FTIR** [ $\bar{\nu}$  ( $\text{cm}^{-1}$ )]: 704, 730, 1027, 1122, 1160, 1247, 1285, 1569, 1657, 2854, 2925. **HRMS** ( $\text{ESI}^+$ ) calcd. for  $[\text{C}_{18}\text{H}_{18}\text{NO}_4\text{S} + \text{H}]^+$  344.0957, found 344.0963.

#### Ethyl 1,1-dioxo-3-(phenylamino)-1-benzothiophene-2-carboxylate **12b**.

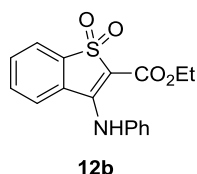

3-Amino-1-benzothiophene-1,1-dione **12b** was prepared according to general procedure using 1,2-benzothiazolidione **2g** (33 mg, 0.1 mmol). Column chromatography (toluene; silica gel was washed with 1%  $\text{Et}_3\text{N}$  in heptane before being used for column chromatography) afforded the product **12b** as a white solid (31 mg, 96%).  $R_f$  (silica gel, toluene): 0.24 (UV,  $\text{KMnO}_4$  solution).  $^1\text{H NMR}$  [400 MHz,  $\delta$  (ppm),  $\text{CDCl}_3$ ]: 1.45 (t,  $J = 7.1$  Hz, 3 H), 4.44 (q,  $J = 7.1$  Hz, 2 H), 6.66 (d,  $J = 8.0$  Hz, 1 H), 7.23–7.28 (m, 1 H), 7.29–7.36 (m, 2 H), 7.43–7.54 (m, 3 H), 7.58–7.62 (m, 1 H), 7.83 (d,  $J = 7.6$  Hz, 1 H), 10.44 (bs, 1 H).  $^{13}\text{C NMR}$  [101 MHz,  $\delta$  (ppm),  $\text{CDCl}_3$ ]: 14.4, 61.3, 99.9, 121.6, 125.7, 125.9, 126.9, 128.7, 130.0, 132.1, 133.2, 137.4, 141.0, 154.8, 164.6. **FTIR** [ $\bar{\nu}$  ( $\text{cm}^{-1}$ )]: 702, 763, 1161, 1246, 1284, 1434, 1561, 1610, 1657, 2854, 2925. **HRMS** ( $\text{ESI}^+$ ) calcd. for  $[\text{C}_{17}\text{H}_{16}\text{NO}_4\text{S} + \text{H}]^+$  330.0800, found 330.0813.

#### Ethyl 5-methoxy-1,1-dioxo-3-(phenylamino)-1-benzothiophenecarboxylate **12c**.

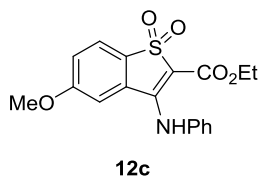

3-Amino-1-benzothiophene-1,1-dione **12c** was prepared according to general procedure using 1,2-benzothiazole-1,1-dione **2h** (36 mg, 0.1 mmol). Column chromatography (toluene; silica gel was washed with 1%  $\text{Et}_3\text{N}$  in heptane before being used for column chromatography) afforded the product **12c** as a white solid (31 mg, 87%).  $R_f$  (silica gel, toluene): 0.20 (UV,  $\text{KMnO}_4$  solution).  $^1\text{H NMR}$  [400 MHz,  $\delta$  (ppm),  $\text{CDCl}_3$ ]: 1.45 (t,  $J = 7.1$  Hz, 3 H), 3.48 (s, 3 H), 4.43 (q,  $J = 7.1$  Hz, 2 H), 6.13 (d,  $J = 2.2$  Hz, 2 H), 7.04 (dd,  $J = 8.5, 2.2$  Hz, 1 H), 7.32–7.38 (m, 2 H), 7.44–7.53 (m, 3 H), 7.72 (d,  $J = 8.5$  Hz, 1 H), 10.41 (bs, 1 H).  $^{13}\text{C NMR}$  [101 MHz,  $\delta$  (ppm),  $\text{CDCl}_3$ ]: 14.4, 55.4, 61.2, 100.7, 111.6, 118.3, 122.8, 127.2, 127.8, 128.8, 130.0, 132.7, 137.4, 154.4, 162.3, 164.5. **FTIR** [ $\bar{\nu}$  ( $\text{cm}^{-1}$ )]: 703, 729, 910, 1021, 1162, 1245, 1567, 1655, 2926. **HRMS** ( $\text{ESI}^+$ ) calcd. for  $[\text{C}_{18}\text{H}_{18}\text{NO}_5\text{S} + \text{H}]^+$  360.0906, found 330.0927.

#### Ethyl 3-(benzylamino)-5-methyl-1,1-dioxo-1-benzothiophene-2-carboxylate **12d**.

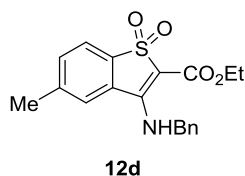

3-Amino-1-benzothiophene-1,1-dione **12d** was prepared according to general procedure using 1,2-benzothiazole-1,1-dione **2k** (36 mg, 0.1 mmol). Column chromatography (toluene; silica gel was washed with 1%  $\text{Et}_3\text{N}$  in heptane before being used for column chromatography) afforded the product **12d** as a white solid (34 mg, 95%).  $R_f$  (silica gel, toluene): 0.25 (UV,  $\text{KMnO}_4$  solution).  $^1\text{H NMR}$  [400 MHz,  $\delta$  (ppm),  $\text{CDCl}_3$ ]: 1.40 (t,  $J = 7.1$  Hz, 3 H), 2.40 (s, 3 H), 4.36 (q,  $J = 7.1$  Hz, 2 H), 5.02 (d,  $J = 5.9$  Hz, 2

H), 7.33–7.40 (m, 3 H), 7.40–7.46 (m, 2 H), 7.49 (d,  $J = 7.8$  Hz, 1 H), 7.59 (s, 1 H), 7.77 (d,  $J = 7.8$  Hz, 1 H), 9.44 (bs, 1 H).  $^{13}\text{C}$  NMR [101 MHz,  $\delta$  (ppm),  $\text{CDCl}_3$ ]: 14.5, 22.2, 50.0, 61.0, 100.1, 121.2, 125.9, 126.5, 127.0, 128.6, 129.8, 133.6, 137.4, 138.2, 142.8, 154.9, 164.5. FTIR [ $\bar{\nu}$  ( $\text{cm}^{-1}$ )]: 735, 786, 1141, 1216, 1268, 1577, 1659, 1738, 2925, 3254. HRMS (ESI $^+$ ) calcd. for  $[\text{C}_{19}\text{H}_{20}\text{NO}_4\text{S} + \text{H}]^+$  358.1113, found 358.1133.

### X-Ray Crystallography of (*E*)-2a, 12a and 12d

**General procedure on example of (*E*)-2a:** High quality single crystal of (*E*)-2a was obtained by slow solvent evaporation. A saturated solution of (*E*)-2a in toluene was prepared and filtered over an Acrodisc HPLC syringe filter to ensure the absence of crystallites. The resulting filtrate was transferred to a scintillation flask that was sealed and equipped with a hollow needle to allow slow evaporation of the solvent. The acquired single crystal was subjected to single X-ray diffraction. Mercury software (Version 3.9; Cambridge Crystallographic Data Centre) was used to visualize the structure (Schemes 7–9).

**Scheme 7.** Crystal structure of (*E*)-2a

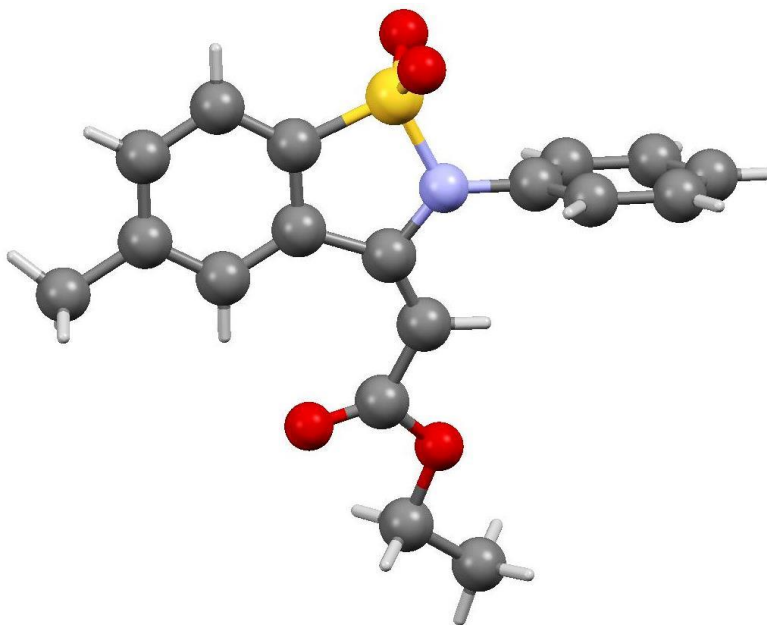

**Scheme 8.** Crystal structure of **12a**

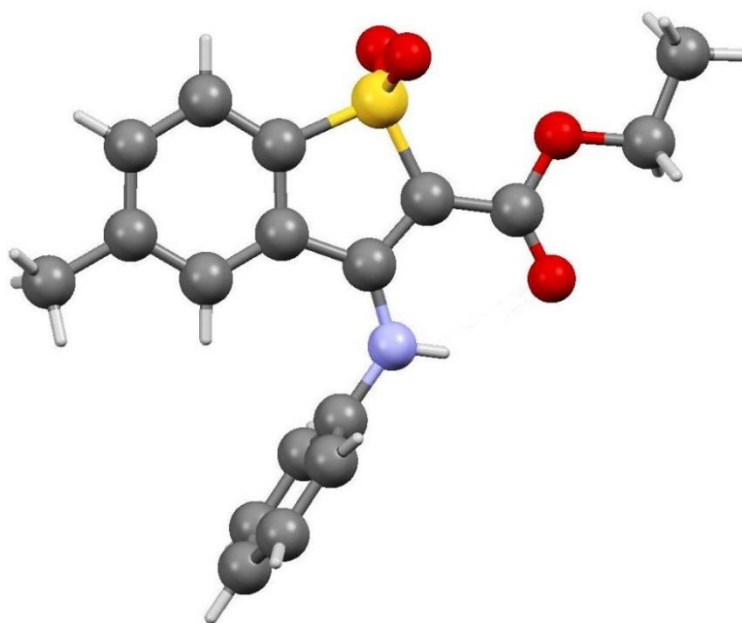

**Scheme 9.** Crystal structure of **12d**

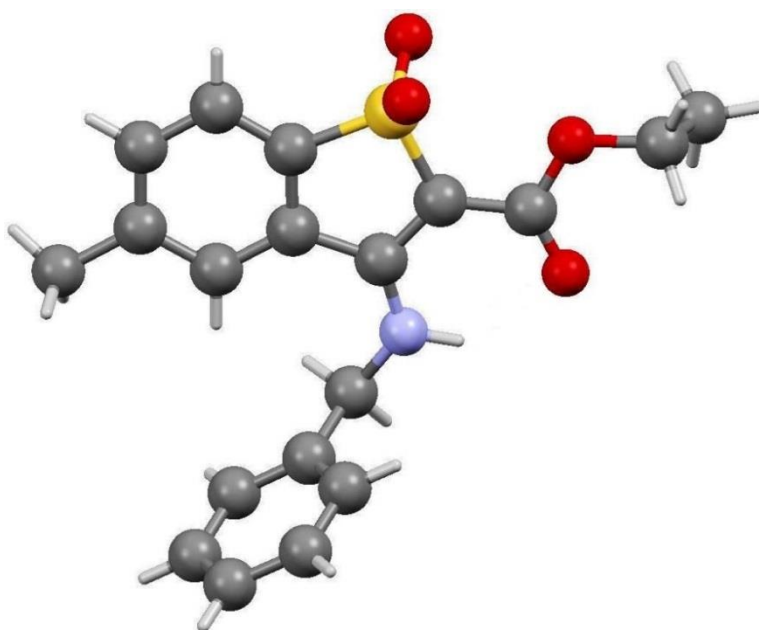



## References and Notes

- <sup>1</sup> O'Sullivan, S.; Doni, E.; Tuttle, T.; Murphy, J. A. *Angew. Chem. Int. Ed.* **2014**, *53*, 474–478.
- <sup>2</sup> Zhang, W.; Xie, J.; Rao, B.; Luo, M. *J. Org. Chem.* **2015**, *80*, 3504–3511.
- <sup>3</sup> Laha, J. K.; Jethava, K. P.; Dayal, N. *J. Org. Chem.* **2014**, *79*, 8010–8019.
- <sup>4</sup> Heffernan, S. J.; Beddoes, J. M.; Mahon, M. F.; Hennessy, A. J.; Carbery, D. R. *Chem. Commun.* **2013**, *49*, 2314–2316.
- <sup>5</sup> Li, F.; Xie, J.; Shan, H.; Sun, C.; Chen, L. *RSC Adv.* **2012**, *2*, 8645–8652.
- <sup>6</sup> Mansfield, S. J.; Campbell, C. D.; Jones, M. W.; Anderson, E. A. *Chem. Commun.* **2015**, *51*, 3316–3319.
- <sup>7</sup> Geary, L. M.; Hultin, P. G. *Org. Lett.* **2009**, *11*, 5478–5481.
- <sup>8</sup> Gillie, A. D.; Jannapu Reddy, R.; Davies, P. W. *Adv. Synth. Catal.* **2016**, *358*, 226–239.
- <sup>9</sup> Zhang, P.; Cook, A. M.; Liu, Y.; Wolf, C. *J. Org. Chem.* **2014**, *79*, 4167–4173.
- <sup>10</sup> Tracey, M. R.; Zhang, Y.; Frederick, M. O.; Mulder, J. A.; Hsung, R. P. *Org. Lett.* **2004**, *6*, 2209–2212.
- <sup>11</sup> Brückner, D. *Tetrahedron* **2006**, *62*, 3809–3814.
- <sup>12</sup> Davies, P. W.; Cremonesi, A.; Martin, N. *Chem. Commun.* **2011**, *47*, 379–381.
- <sup>13</sup> This side product is a result of addition of 4-nitro-*N*-phenylbenzenesulfonamide **S4** to **1i** formed during the reaction.
- <sup>14</sup> Chen, P.; Song, C.-X.; Wang, W.-S.; Yua, X.-L.; Tang, Y. *RSC Adv.* **2016**, *6*, 80055–80058.

## Content

|                                                                                   |   |
|-----------------------------------------------------------------------------------|---|
| Computational Methods .....                                                       | 3 |
| DFT Studies of the Reaction Mechanism .....                                       | 4 |
| Cartesian coordinates of the structures involved in the computational study ..... | 8 |

## Content

|                                                                                                                                                        |    |
|--------------------------------------------------------------------------------------------------------------------------------------------------------|----|
| Sulfonyl Ynamines <b>1e</b> , <b>1g</b> , <b>1h</b> , <b>1i</b> and Compound <b>15</b> .....                                                           | 3  |
| Intramolecular Hydroarylation of Sulfonyl Ynamine <b>1a</b> . Products ( <i>E</i> )- <b>2a</b> , ( <i>Z</i> )- <b>2a</b> , <b>4</b> and <b>5</b> ..... | 13 |
| Intramolecular Hydroarylation of Sulfonyl Ynamines. Products ( <i>E</i> )- <b>2b–k</b> and <b>6</b> .....                                              | 23 |
| Photochemical Rearrangement of 1,2-Benzothiazole-1,1-diones. Products <b>12a–d</b> .....                                                               | 45 |

# Sulfonyl Ynamines 1e, 1g, 1h, 1i and Compound 15

IB351-2F2

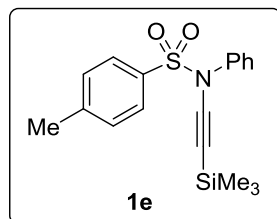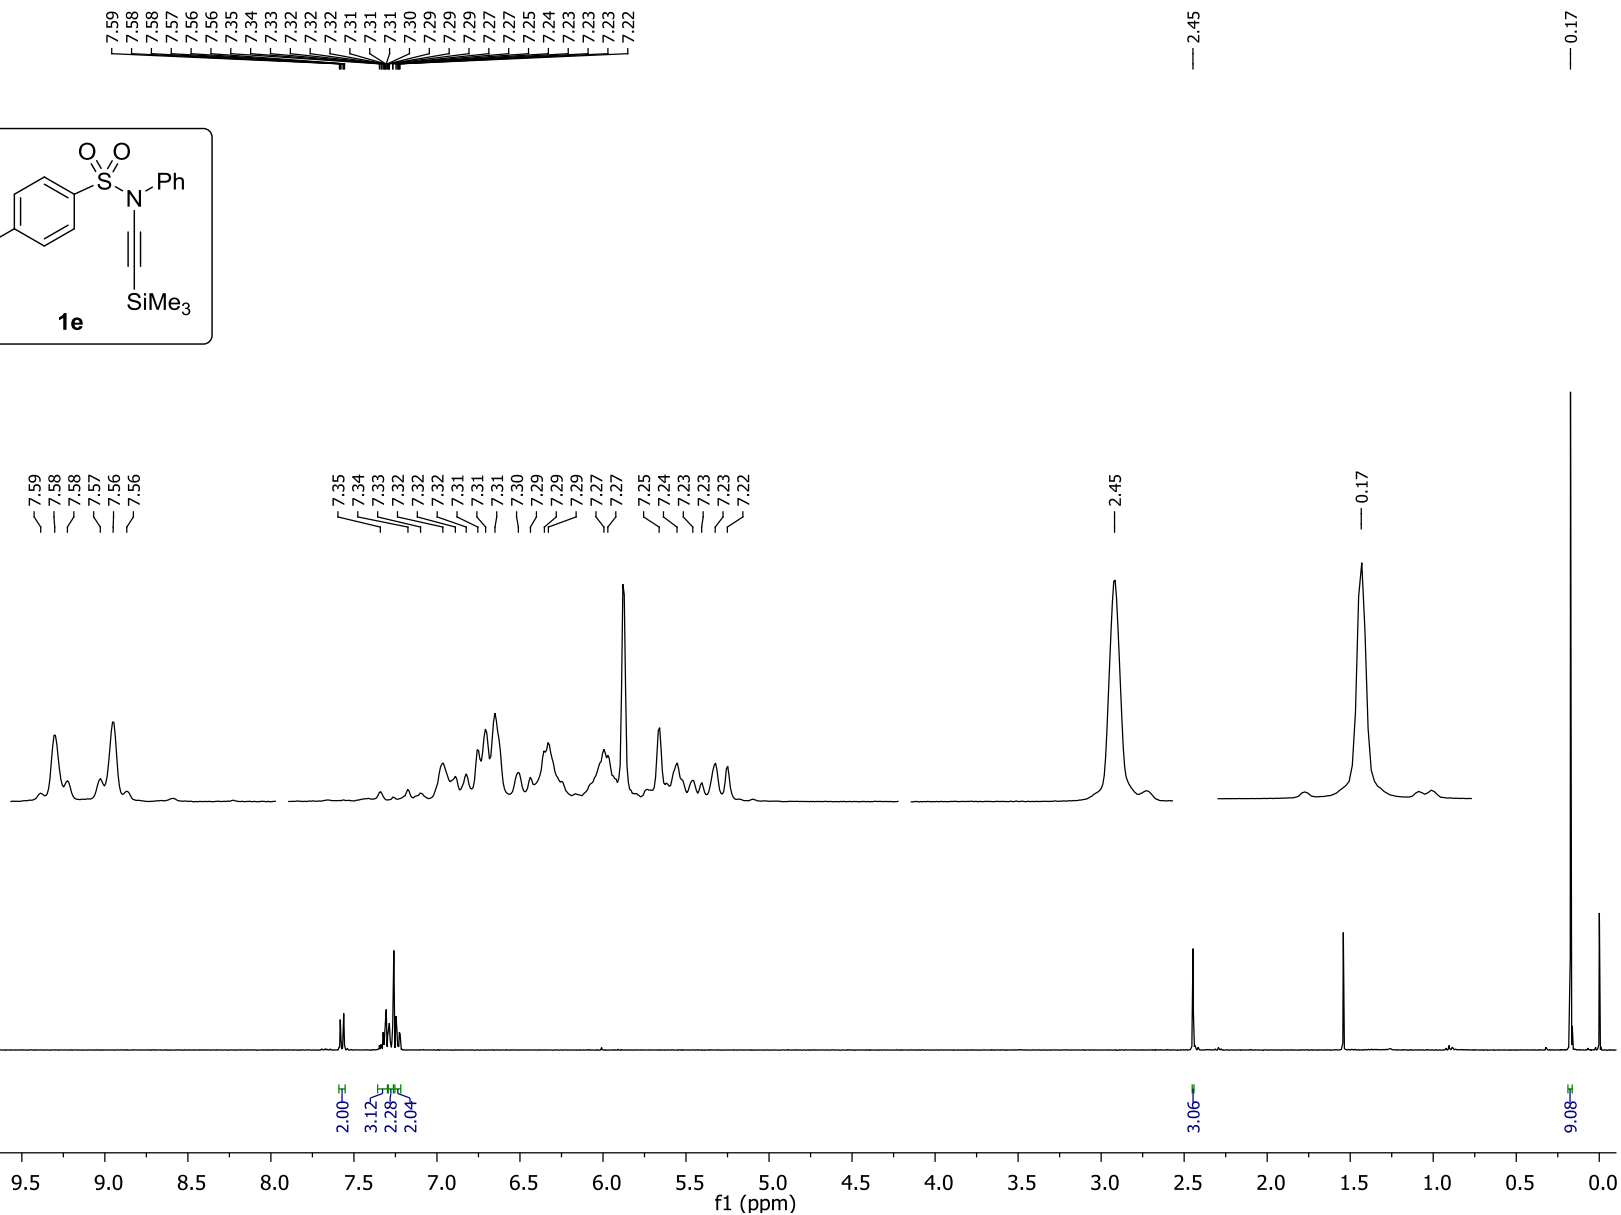

IB351-2F2-C13

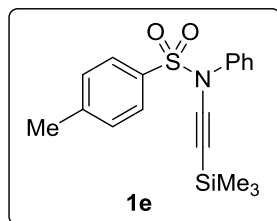

— 145.06  
— 138.72  
/ 132.99  
/ 129.47  
/ 129.17  
/ 128.55  
/ 128.32  
/ 126.33

— 21.86

— 0.16

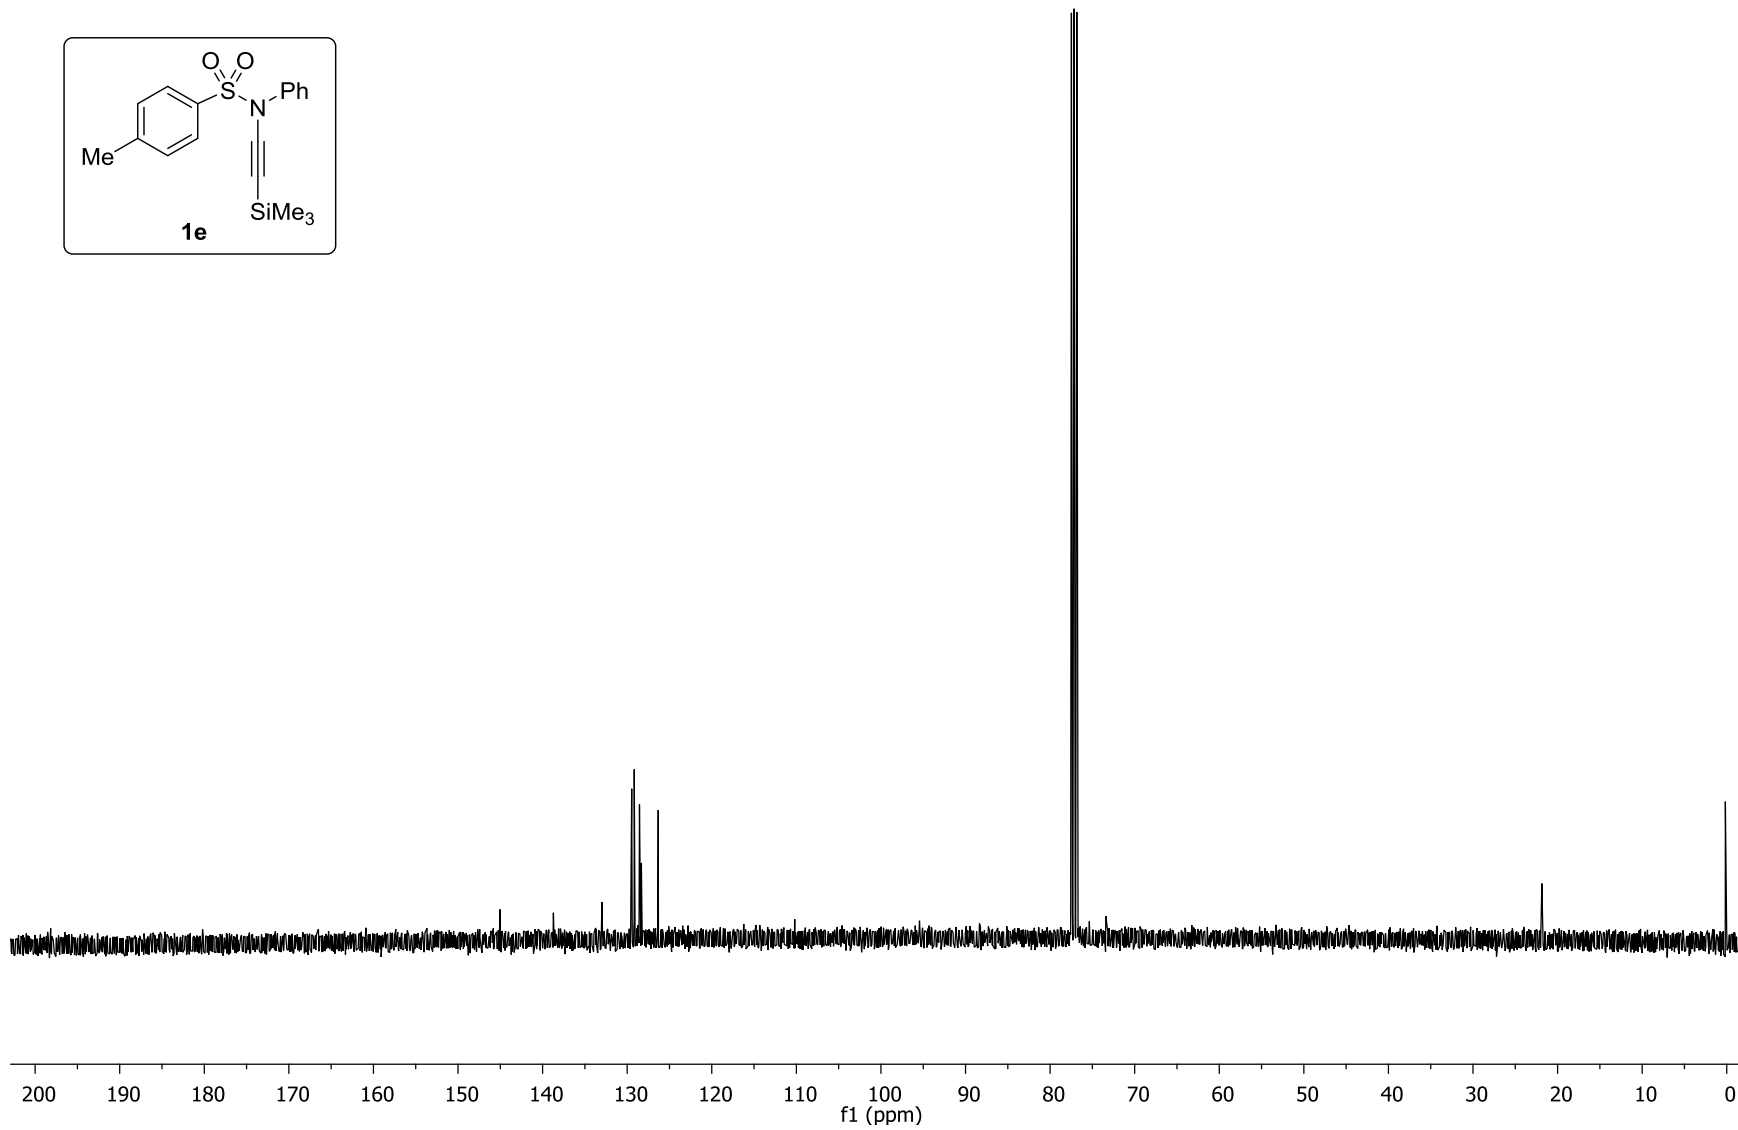

IB374-1F2

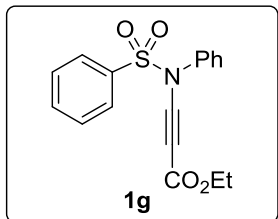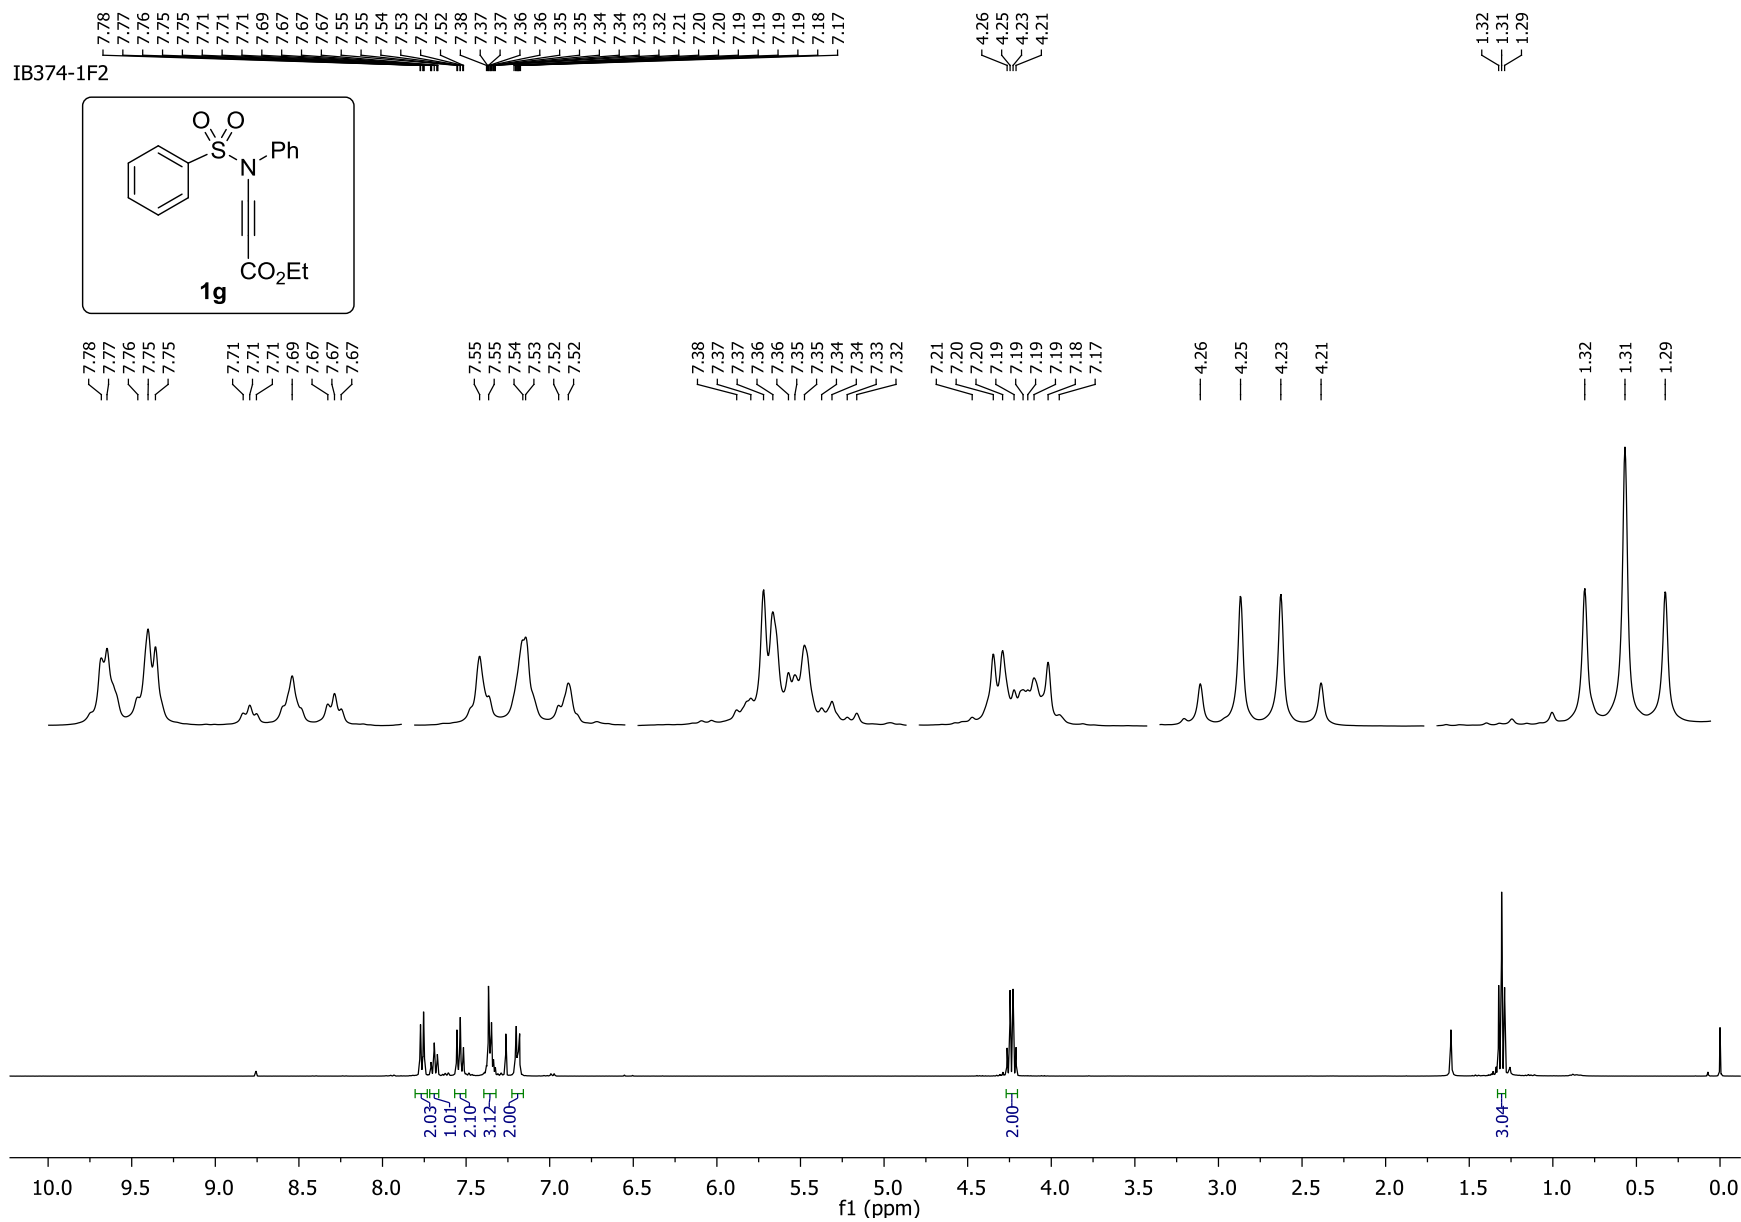

IB374-1F2

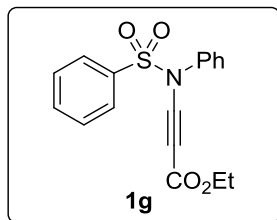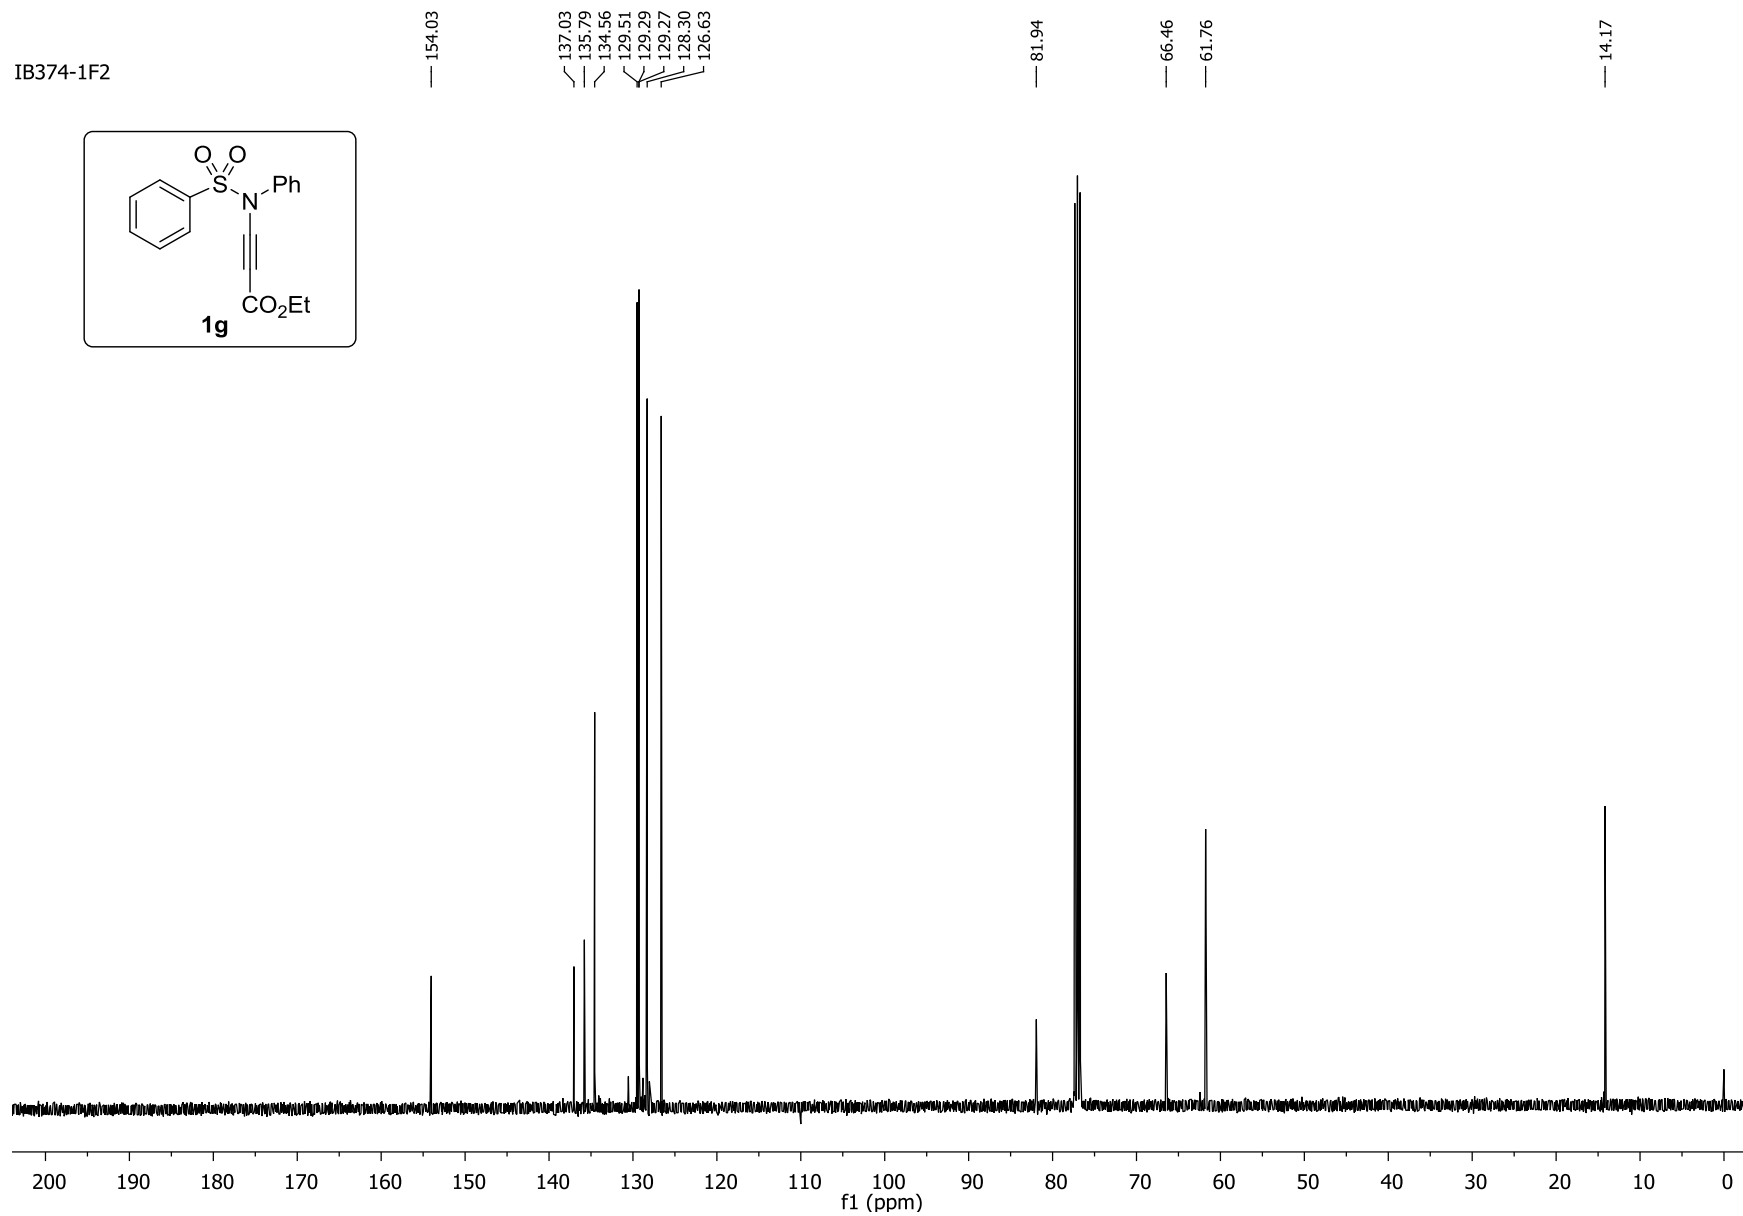

IB371-1F1

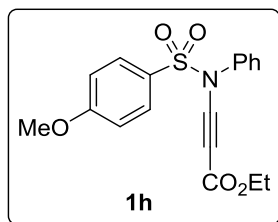

7.69  
7.69  
7.68  
7.67  
7.36  
7.36  
7.35  
7.35  
7.34  
7.22  
7.21  
7.21  
7.20  
7.20  
7.20  
7.19  
7.19  
6.99  
6.98  
6.97  
6.96  
6.96  
6.95

4.26  
4.24  
4.22  
4.20  
3.88

1.32  
1.30  
1.28

7.69  
7.69  
7.68  
7.67

7.36  
7.36  
7.35  
7.35  
7.34

7.22  
7.21  
7.21  
7.20  
7.20  
7.19

6.99  
6.98  
6.97  
6.96  
6.96  
6.95

4.26  
4.24  
4.22  
4.20

3.88

1.32  
1.30  
1.28

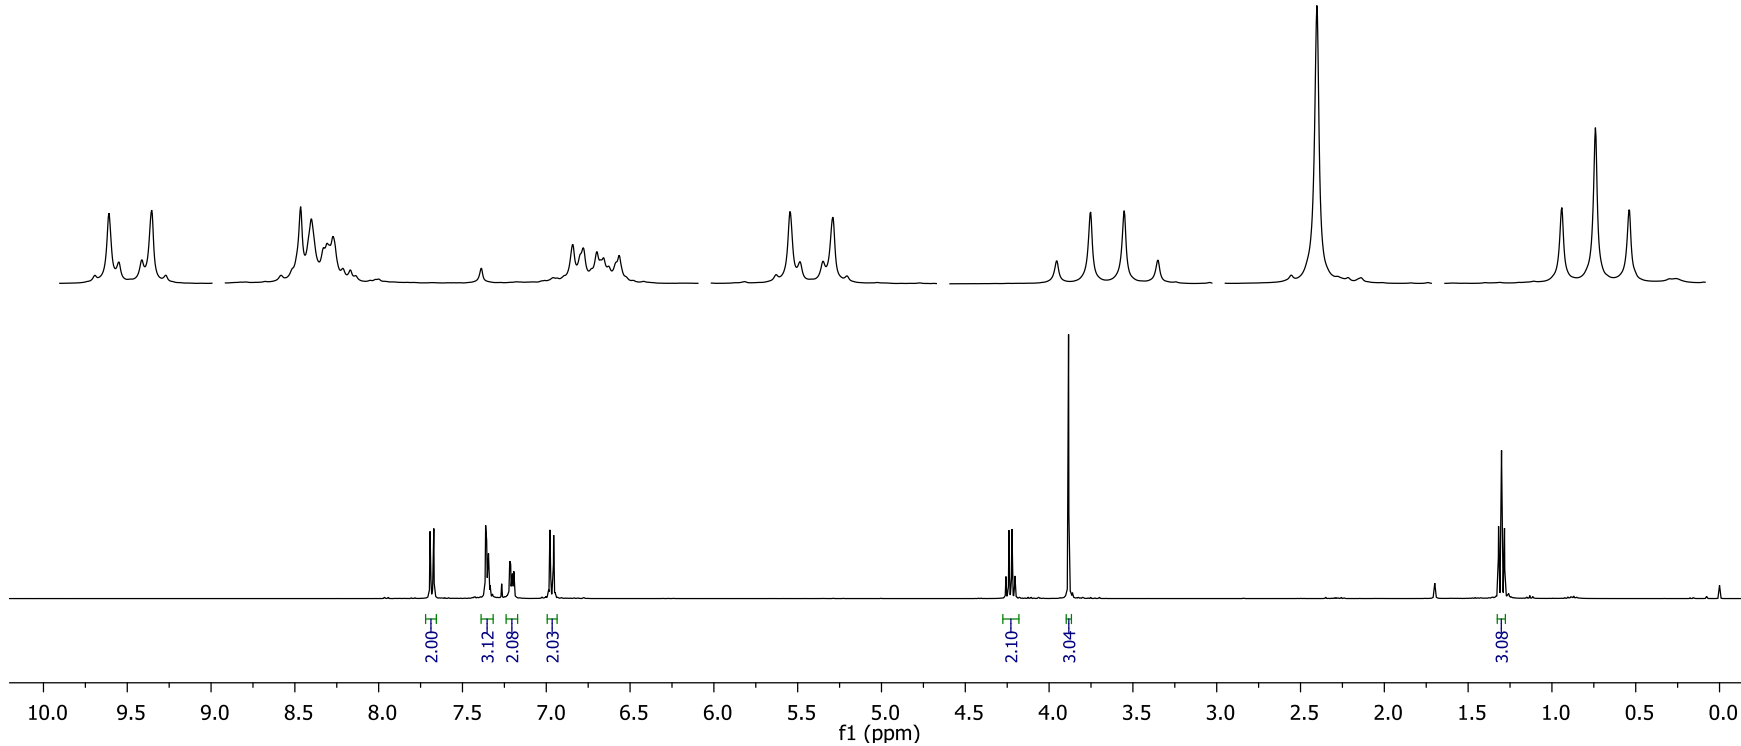



IB371-1F1

— 164.44

— 154.12

— 137.20

— 130.64

— 129.46

— 129.16

— 127.16

— 126.64

— 114.44

— 82.47

— 66.57

— 61.70

— 55.79

— 14.18

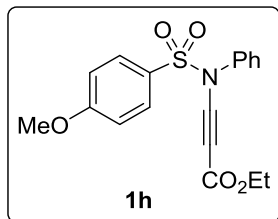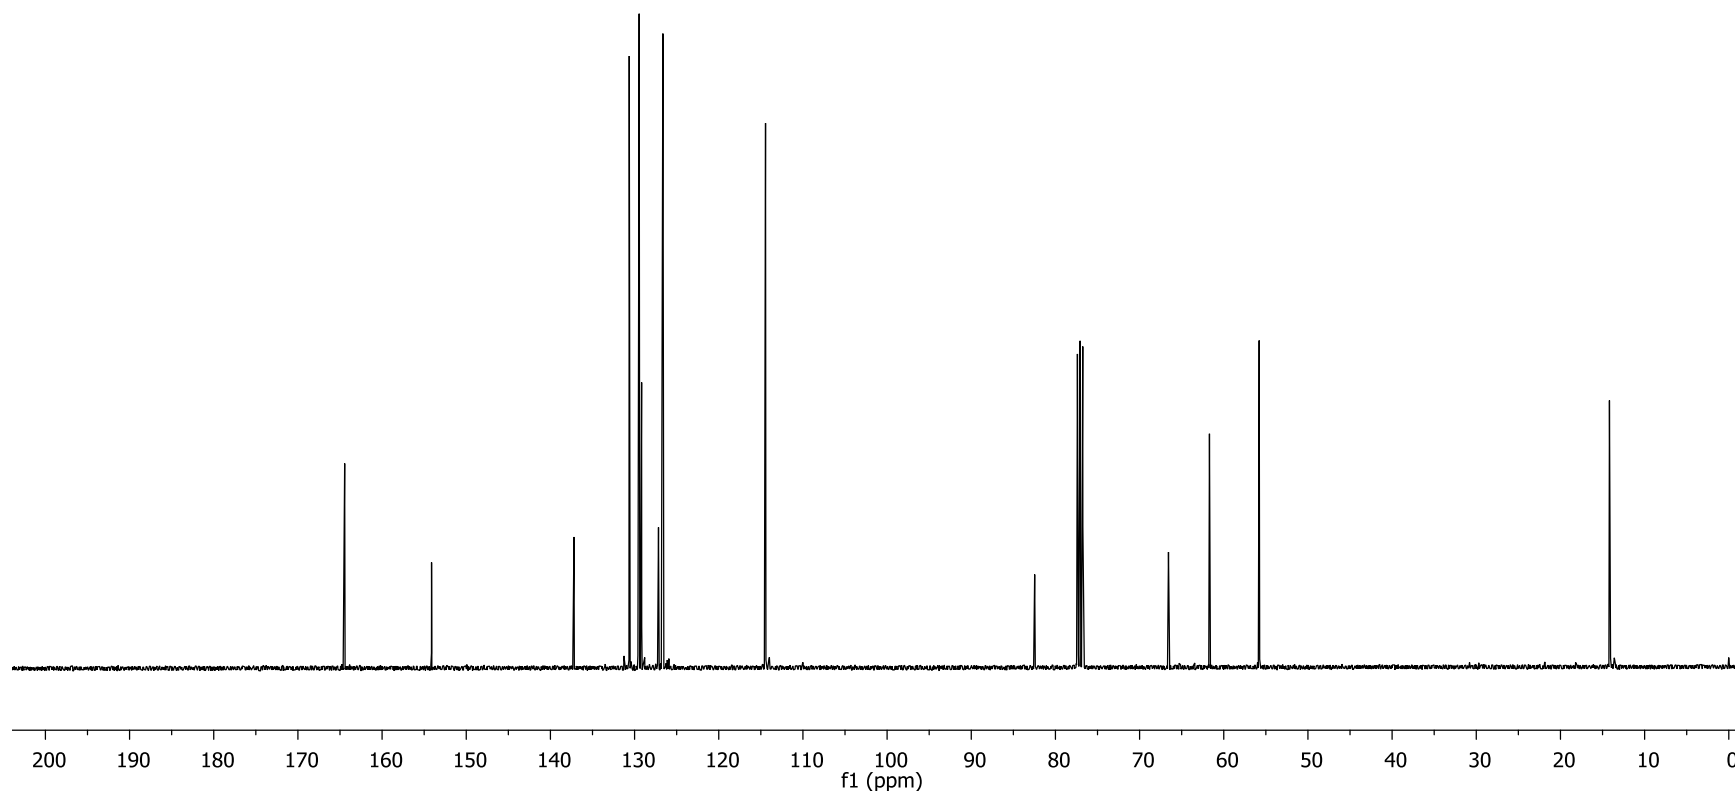

IB377-1F1

8.39  
8.39  
8.37  
8.37  
7.96  
7.96  
7.94  
7.94  
7.43  
7.41  
7.41  
7.39  
7.38  
7.38  
7.37  
7.22  
7.21  
7.21  
7.19  
7.19

4.28  
4.26  
4.24  
4.22

1.33  
1.32  
1.30

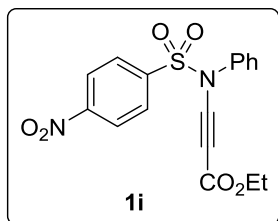

8.39  
8.39  
8.37  
8.37

7.96  
7.96  
7.94  
7.94

7.44  
7.43  
7.41  
7.41  
7.39  
7.38  
7.38  
7.37

7.22  
7.21  
7.21  
7.19  
7.19

4.28  
4.26  
4.24  
4.22

1.33  
1.32  
1.30

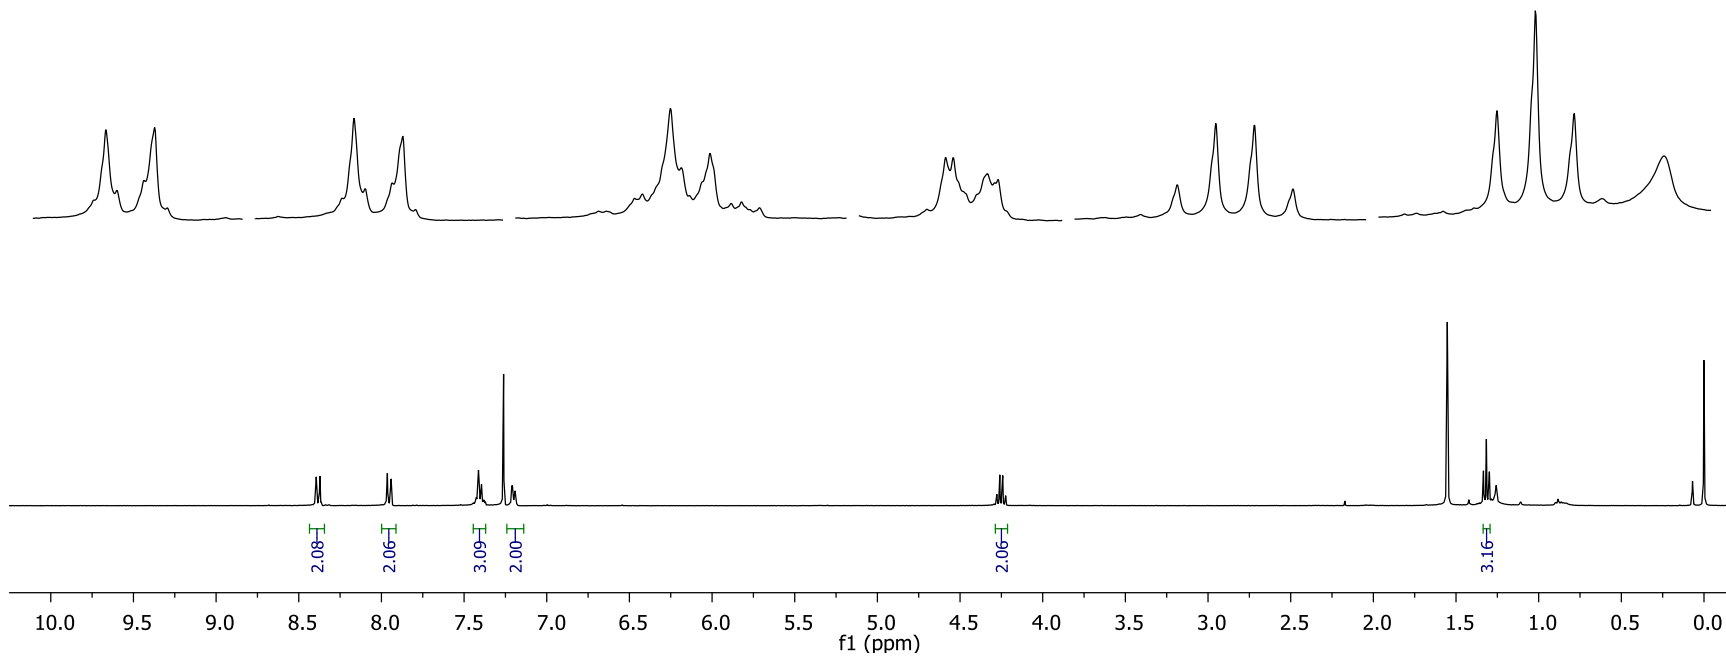

IB377-1F1

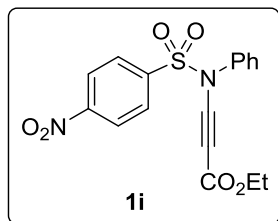

— 153.60

— 140.88

— 136.47

129.84

129.81

129.66

126.49

124.47

— 80.40

— 66.72

— 62.02

— 14.14

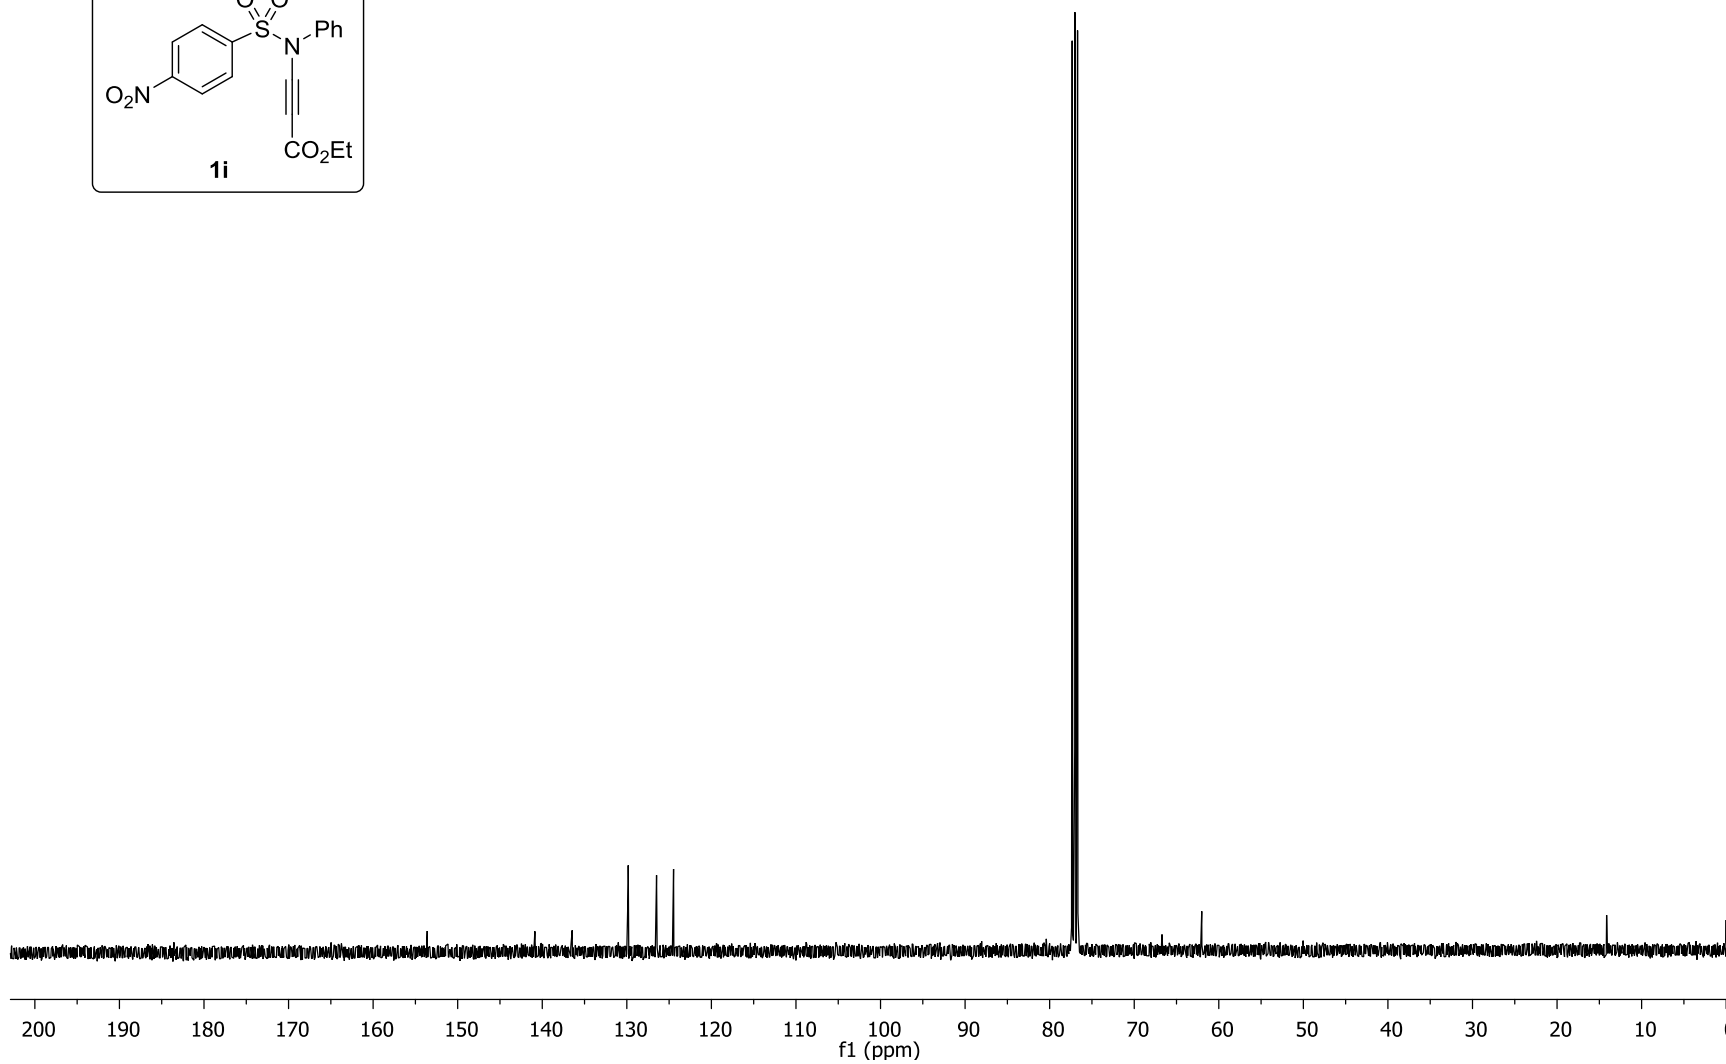

IB377-1F2

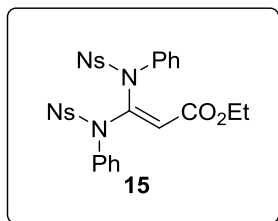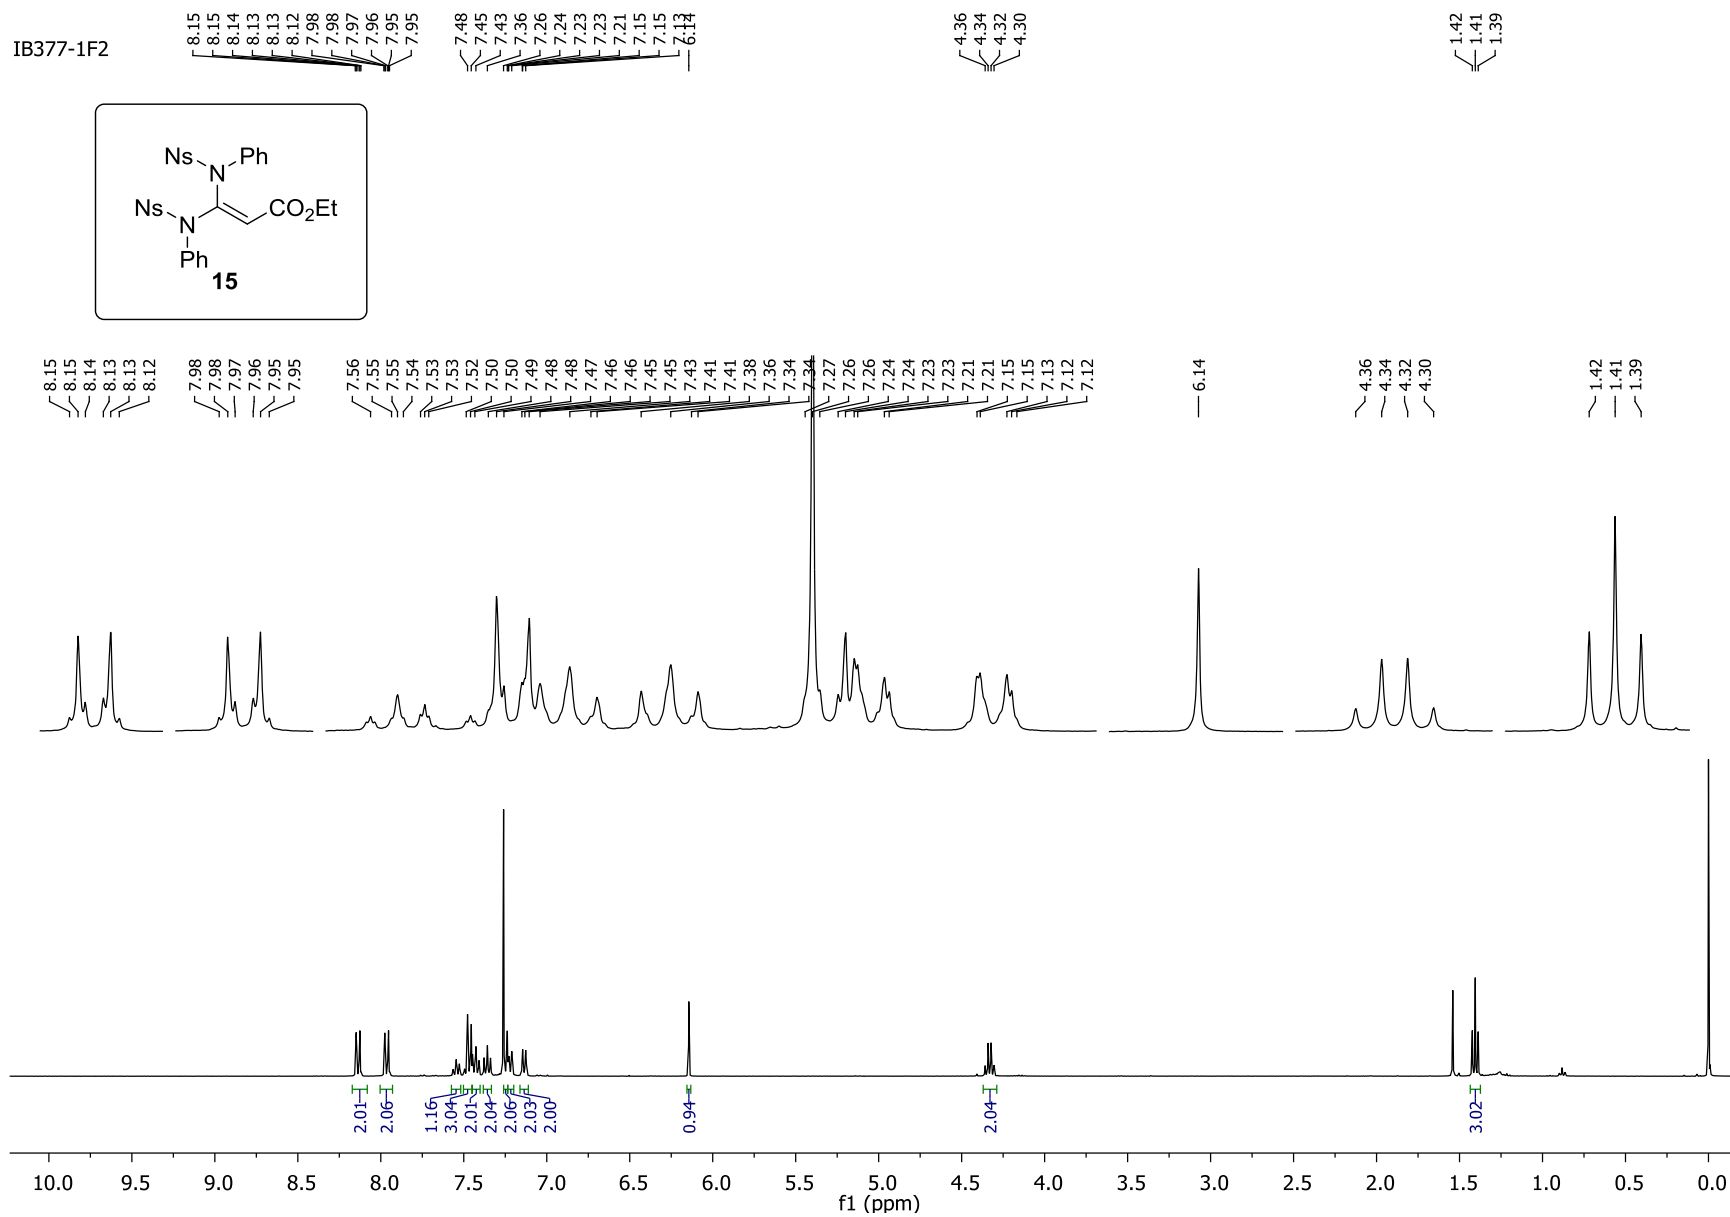

IB377-1F2

— 163.93

150.36  
149.89

144.17  
143.41

139.85  
136.29

135.99

129.99  
129.36

128.74  
123.42

— 117.53

— 110.00

— 61.55

— 14.14

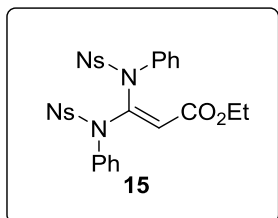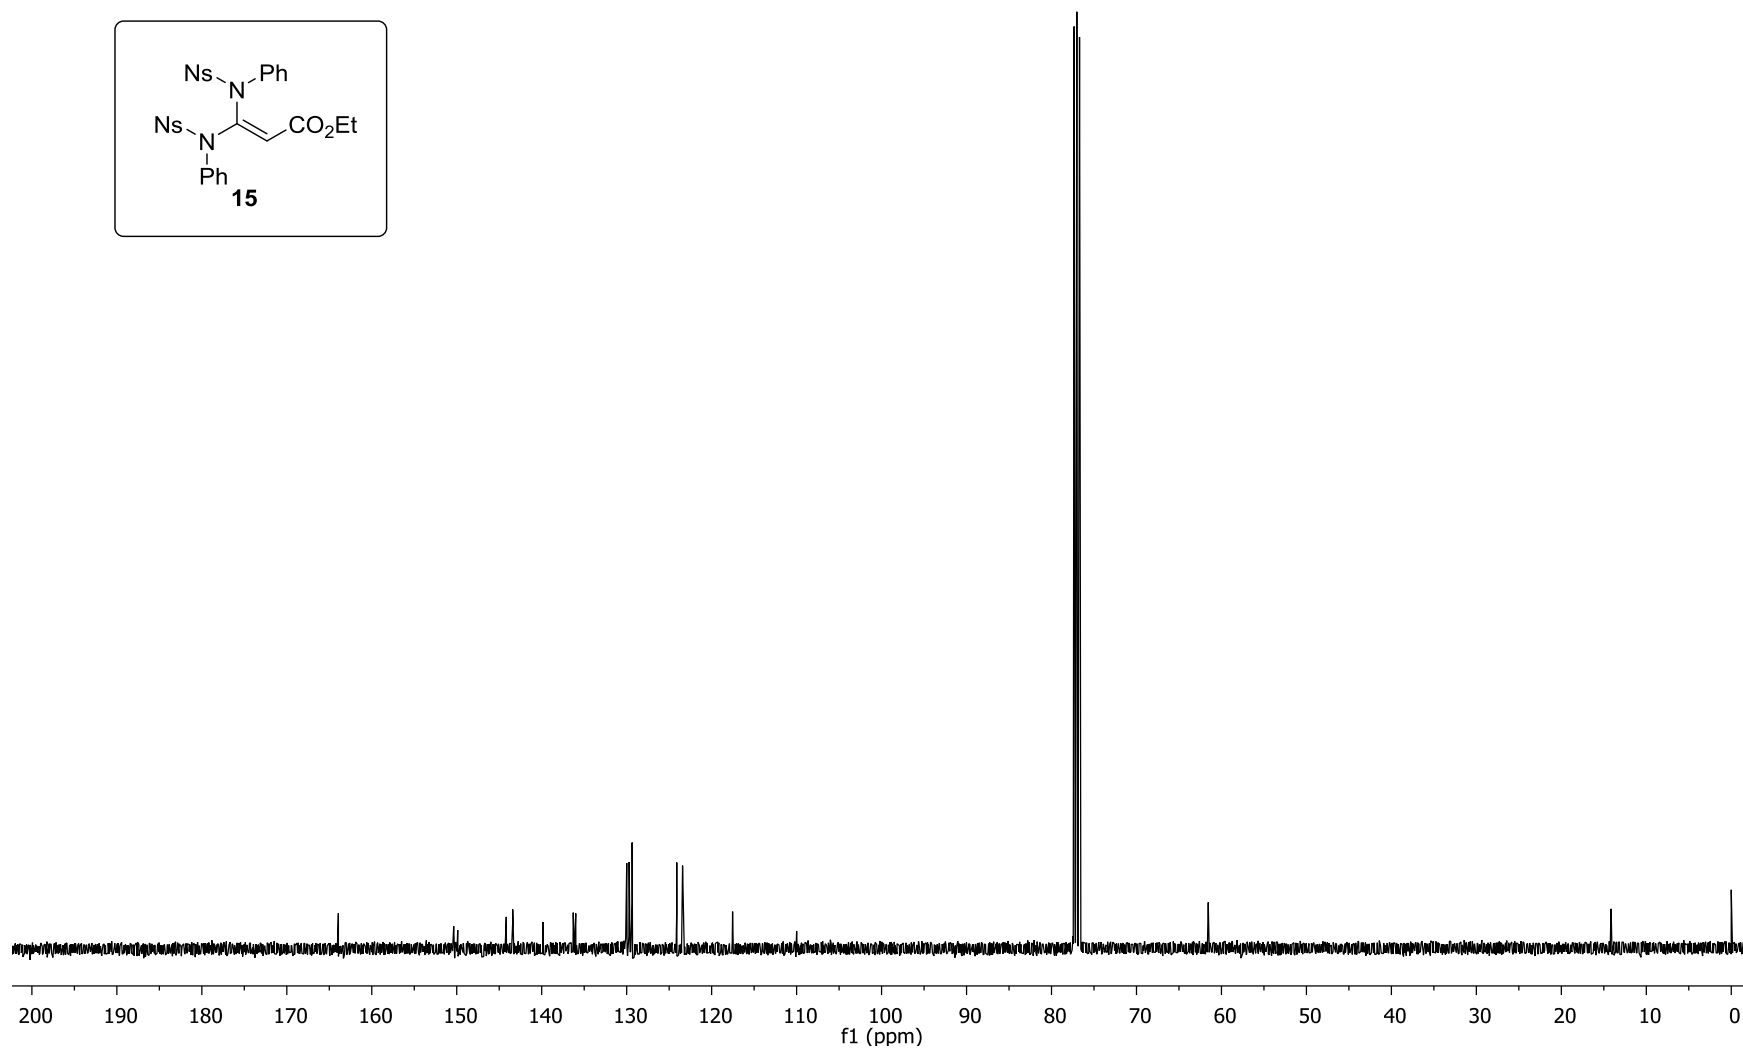

Intramolecular Hydroarylation of Sulfonyl Ynamine 1a. Products (*E*)-2a, (*Z*)-2a, 4 and 5

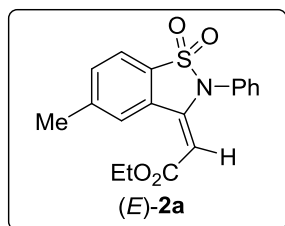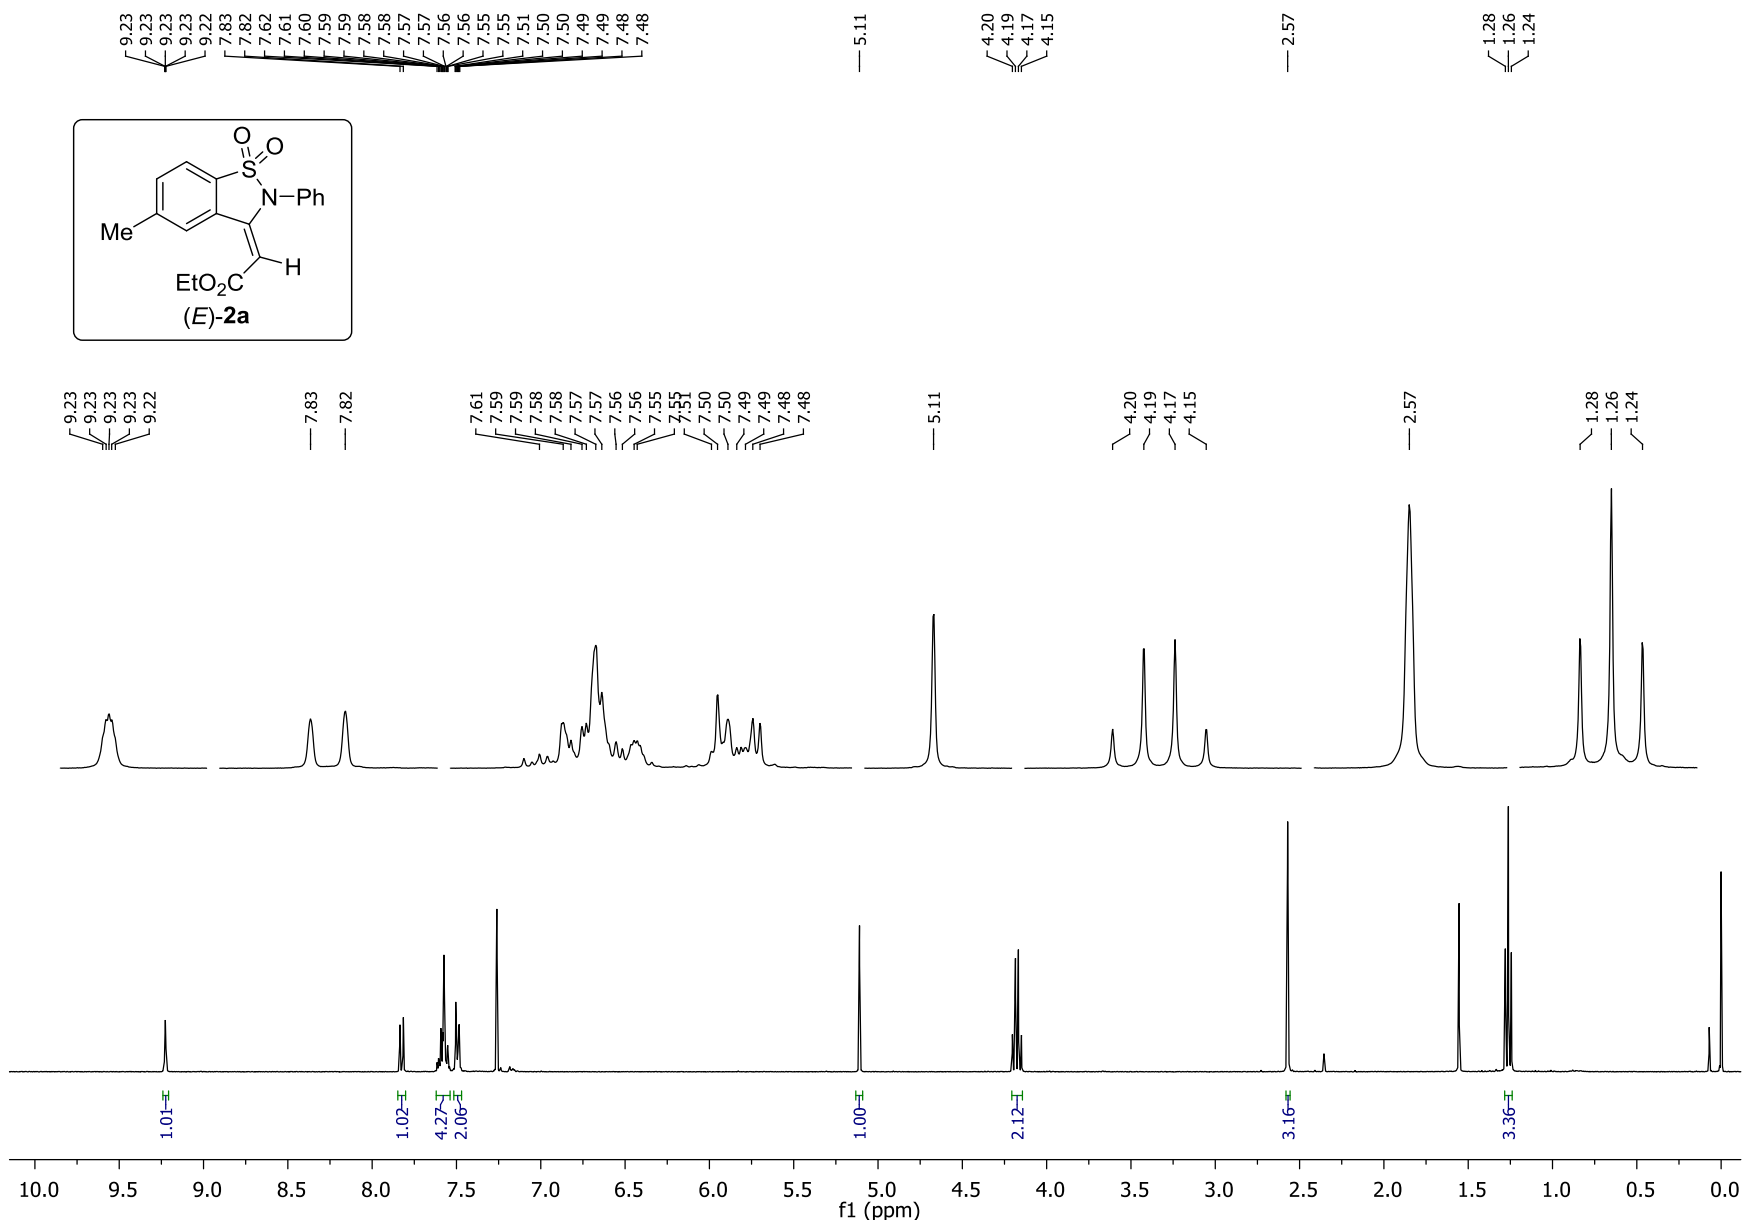

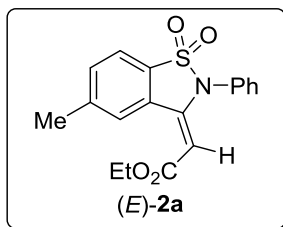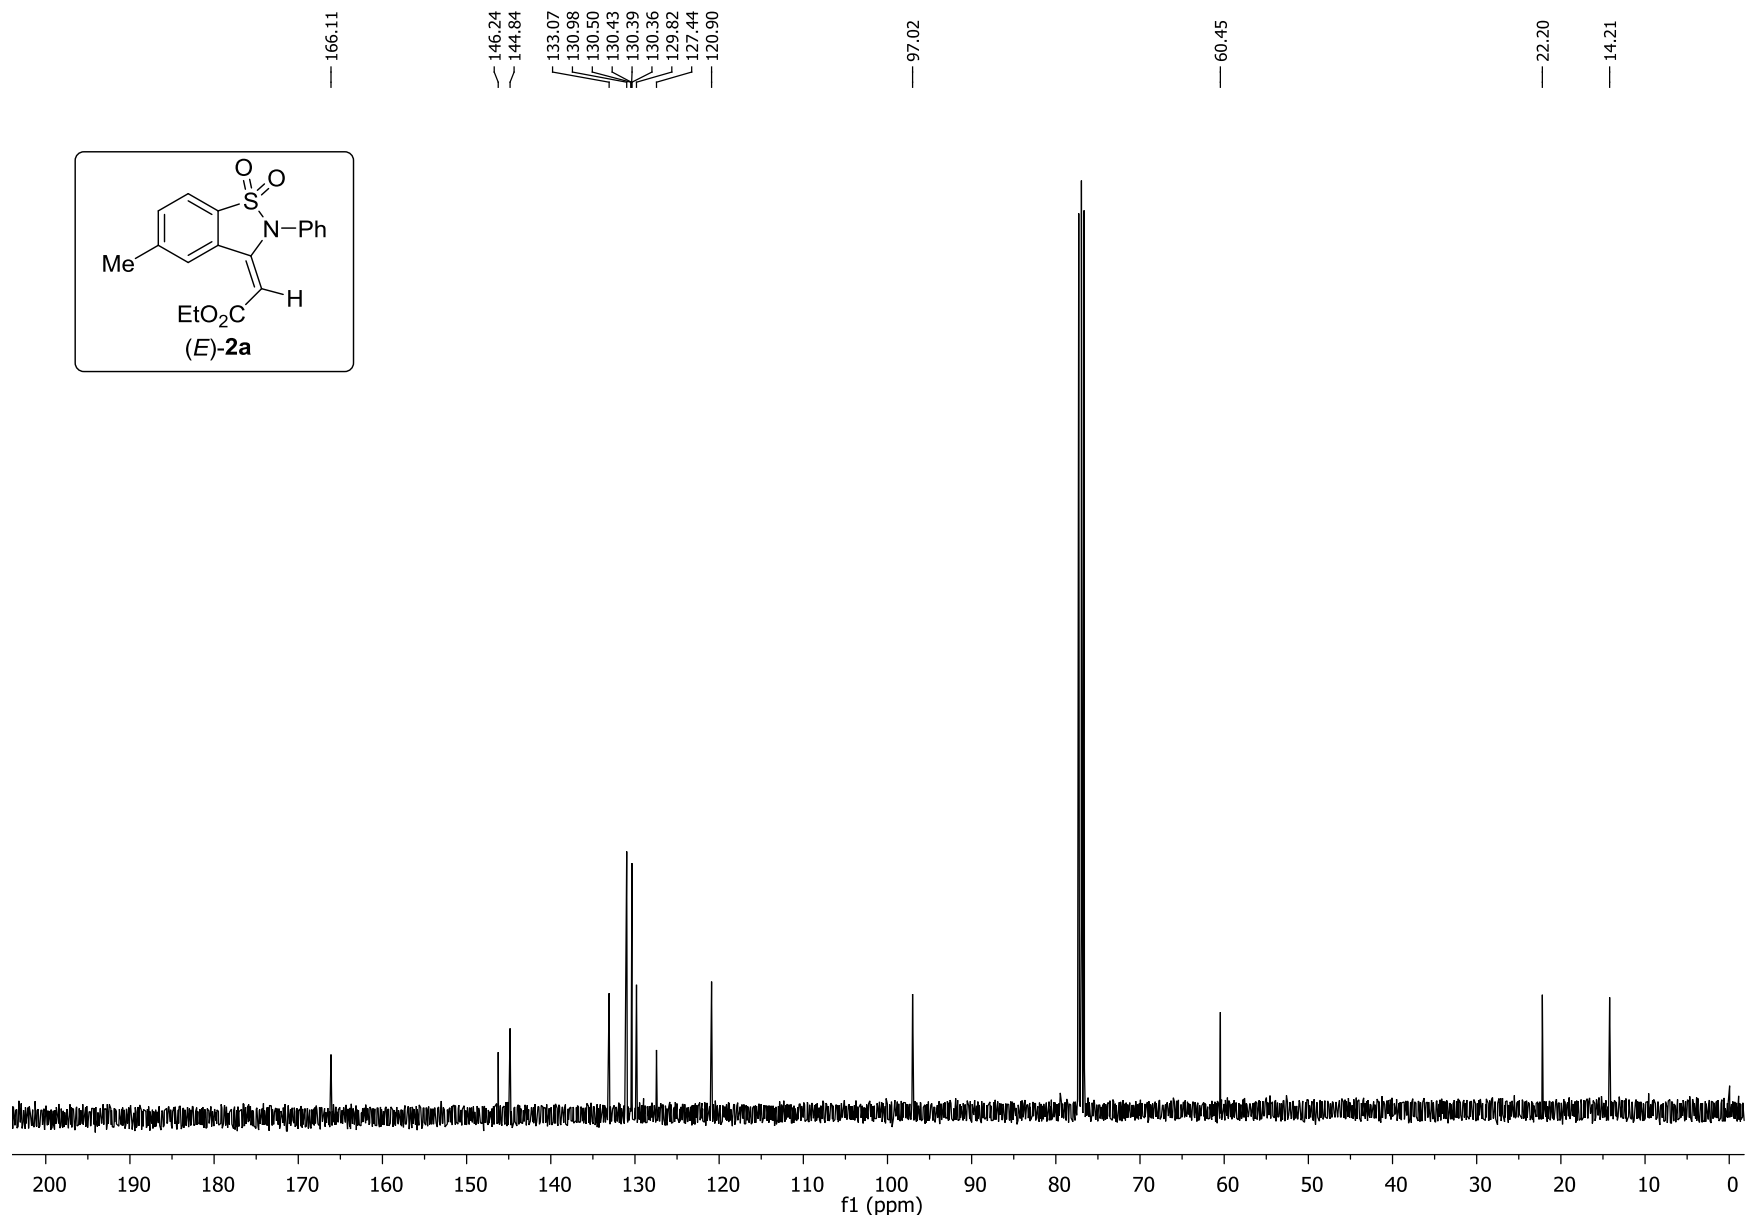

NOESY/25  
for sel1d  
1D Selective Gradient NOESY  
freq: 5.132ppm 1 1

7.57  
7.50  
7.48

5.11

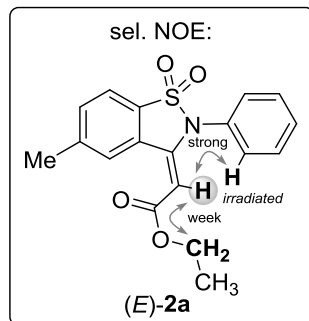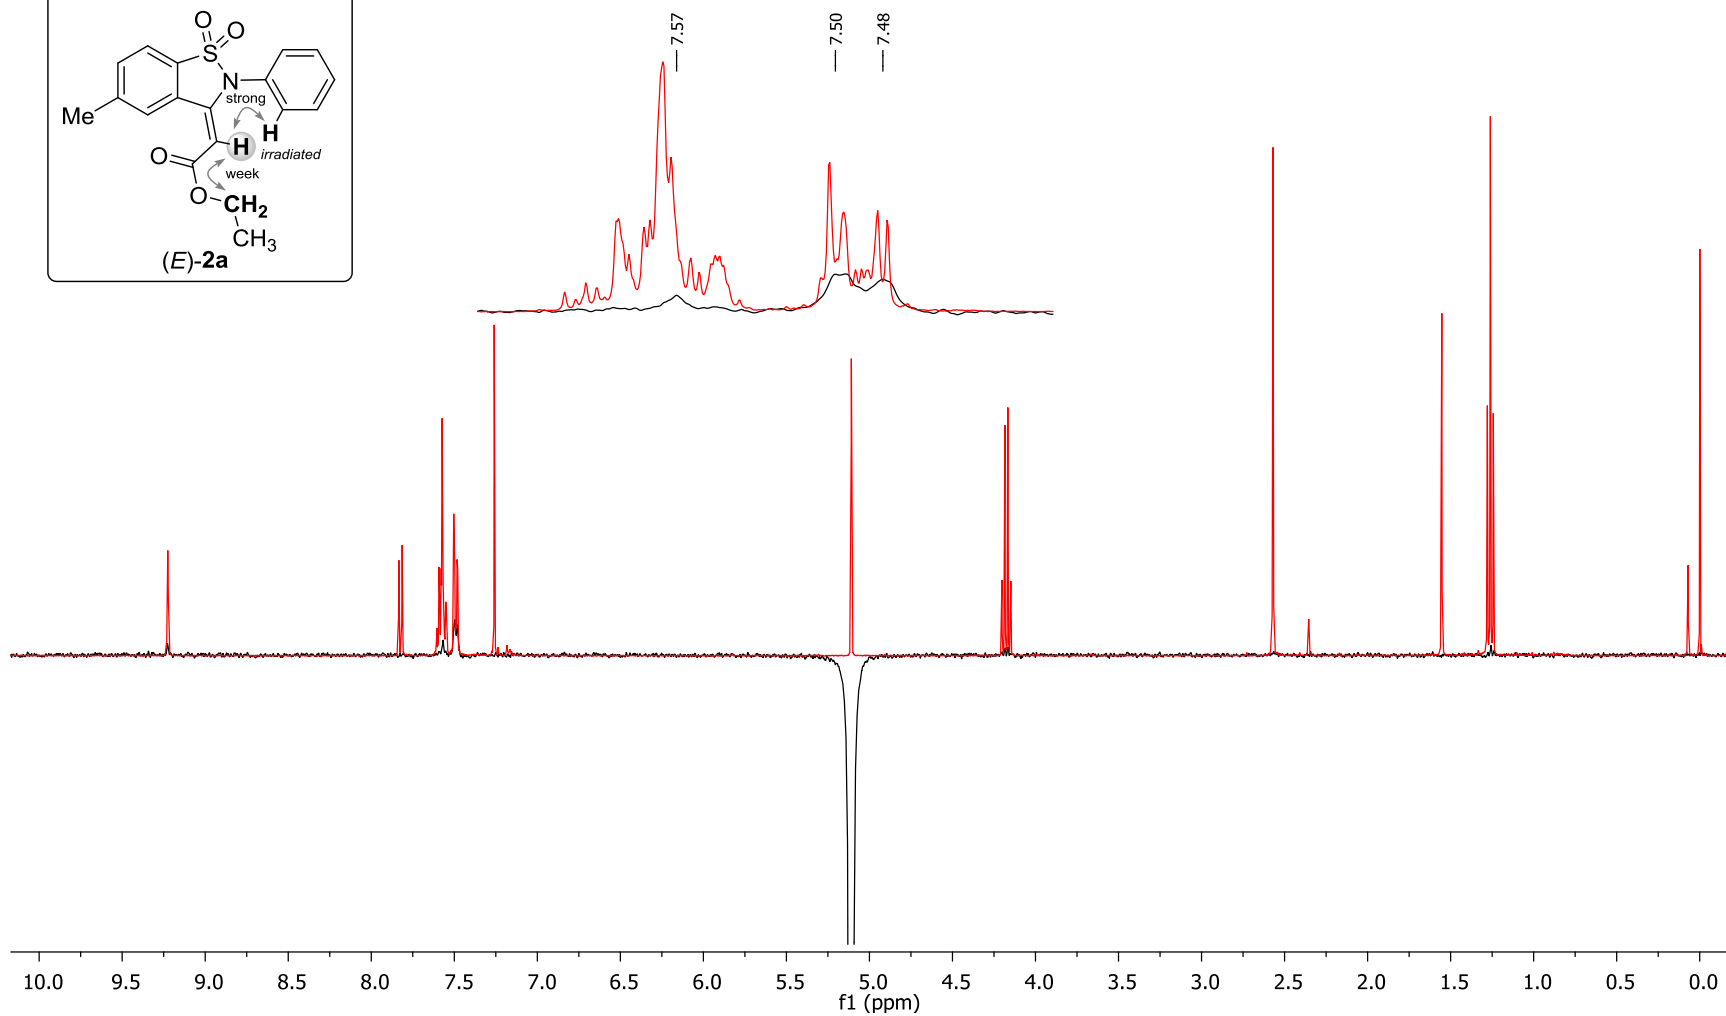



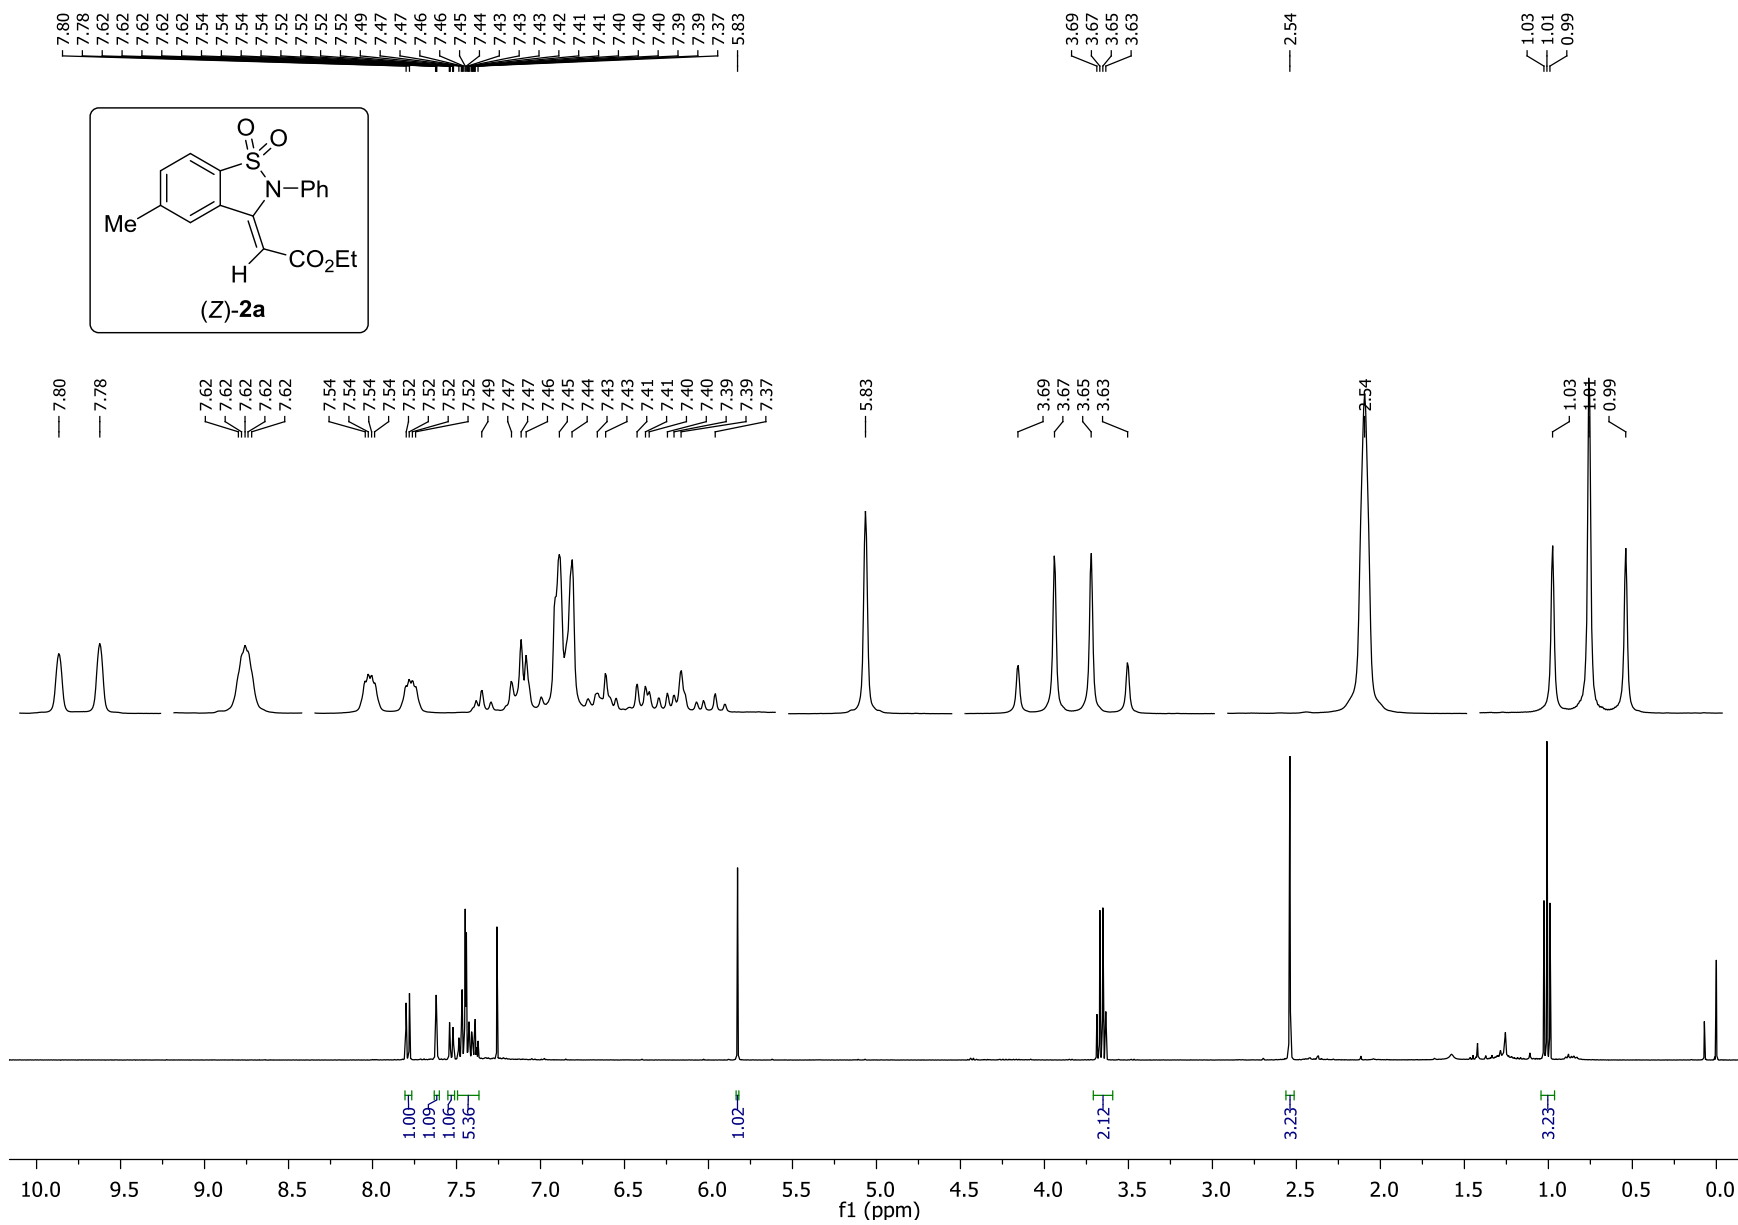

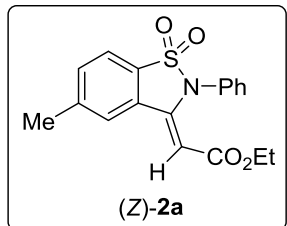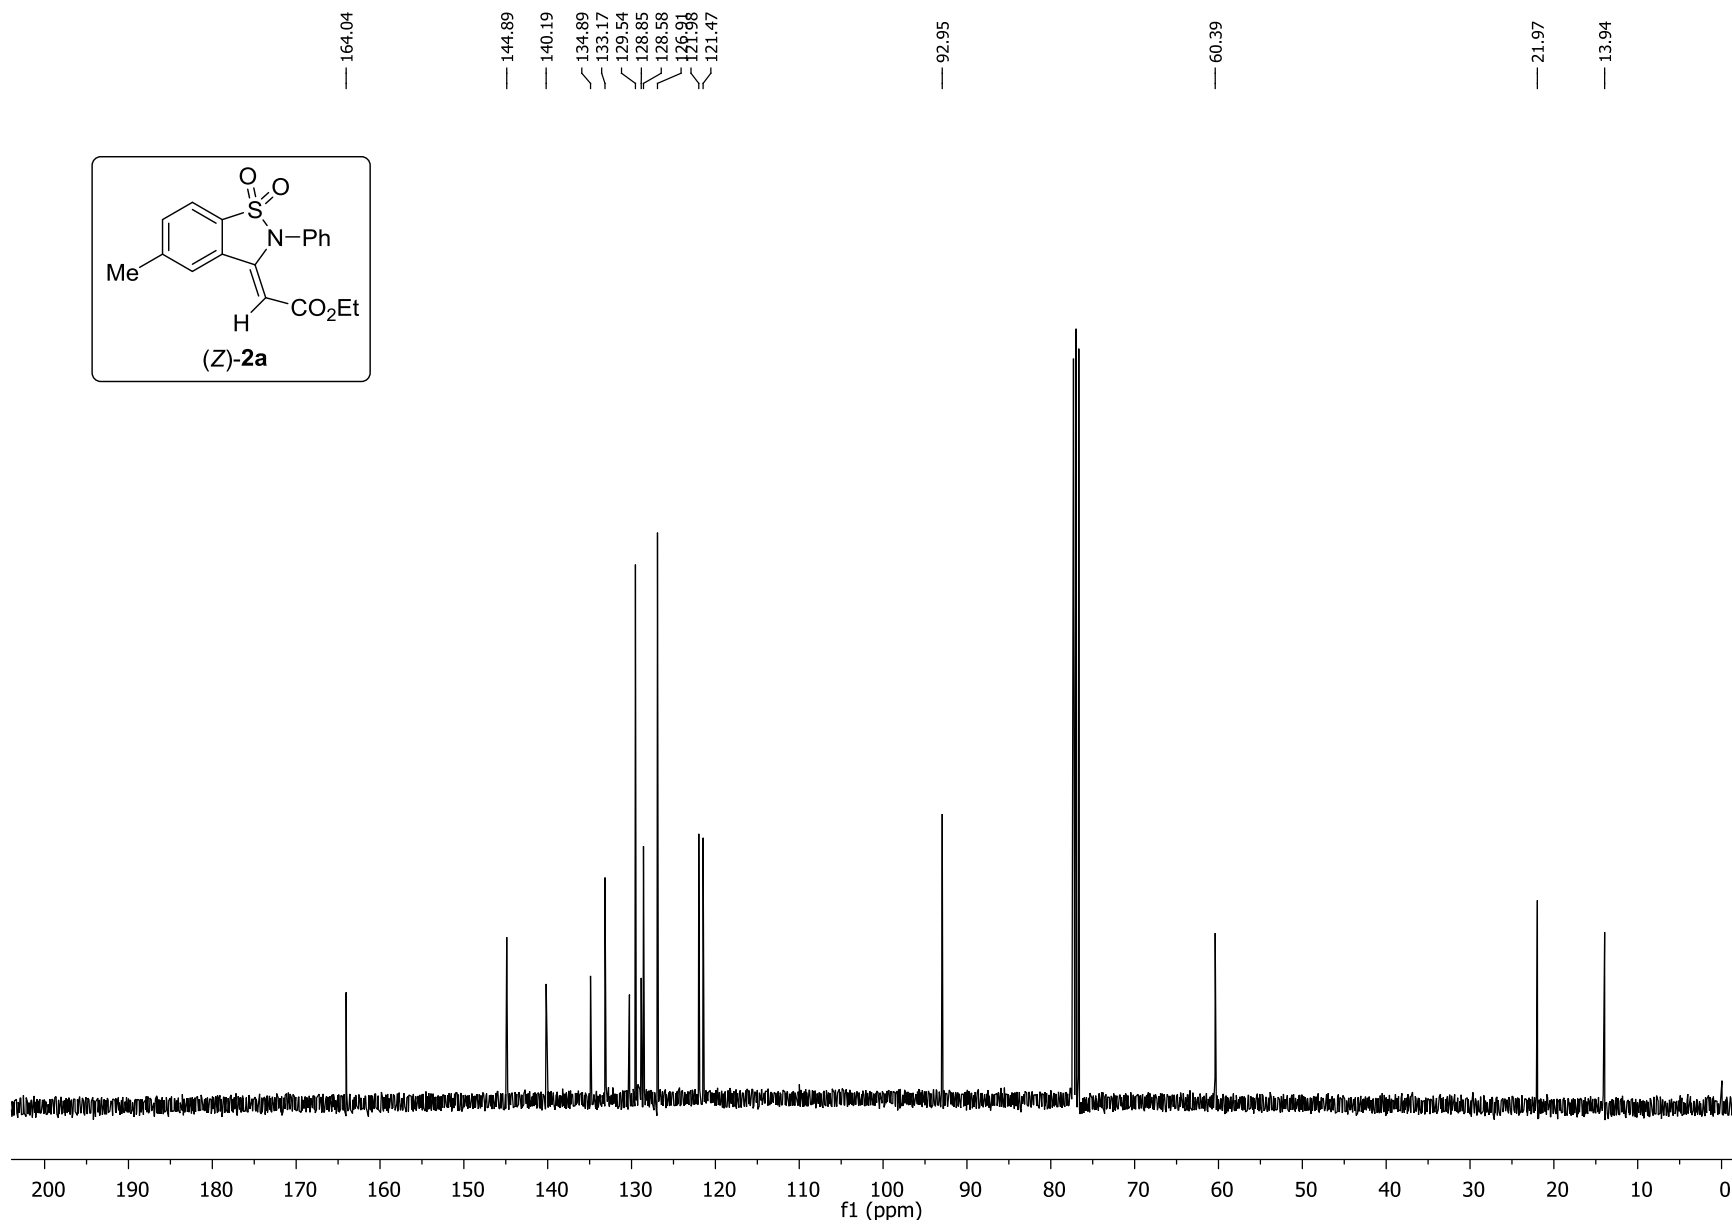

Sel1d IB337-6F2  
1D Selective Gradient NOESY  
freq: 5.850ppm 1 1

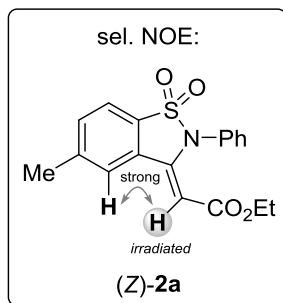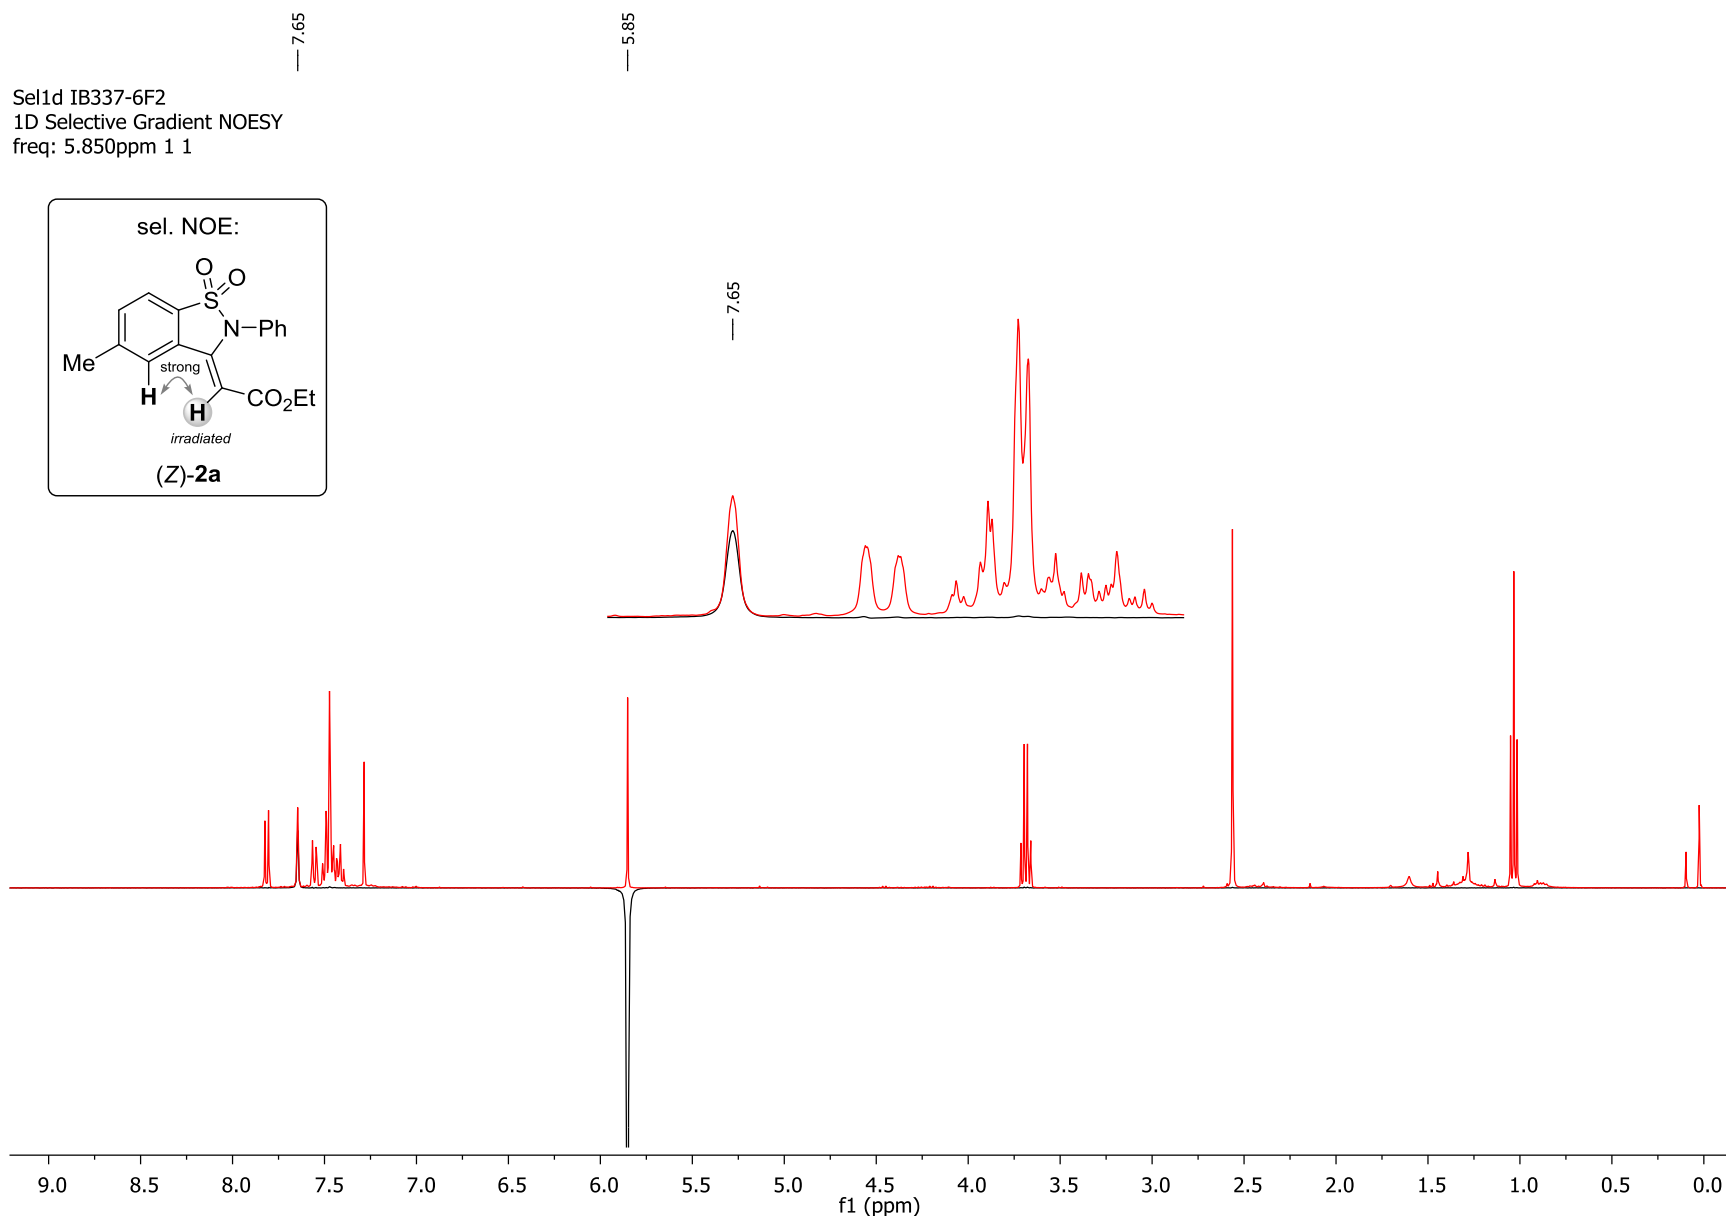

7.45  
7.43  
7.43  
7.42  
7.39  
7.38  
7.38  
7.37  
7.36  
7.36  
7.36  
7.35  
7.35  
7.34  
7.31  
7.30  
7.29  
7.29  
7.28  
7.27  
7.27  
7.17  
7.17  
7.16  
7.15  
7.14  
7.14  
7.10  
7.08  
6.92  
6.91  
6.90  
6.89  
6.87

IB355-4

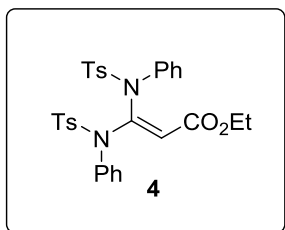

4.35  
4.33  
4.32  
4.30

2.38  
2.30

1.41  
1.39  
1.37

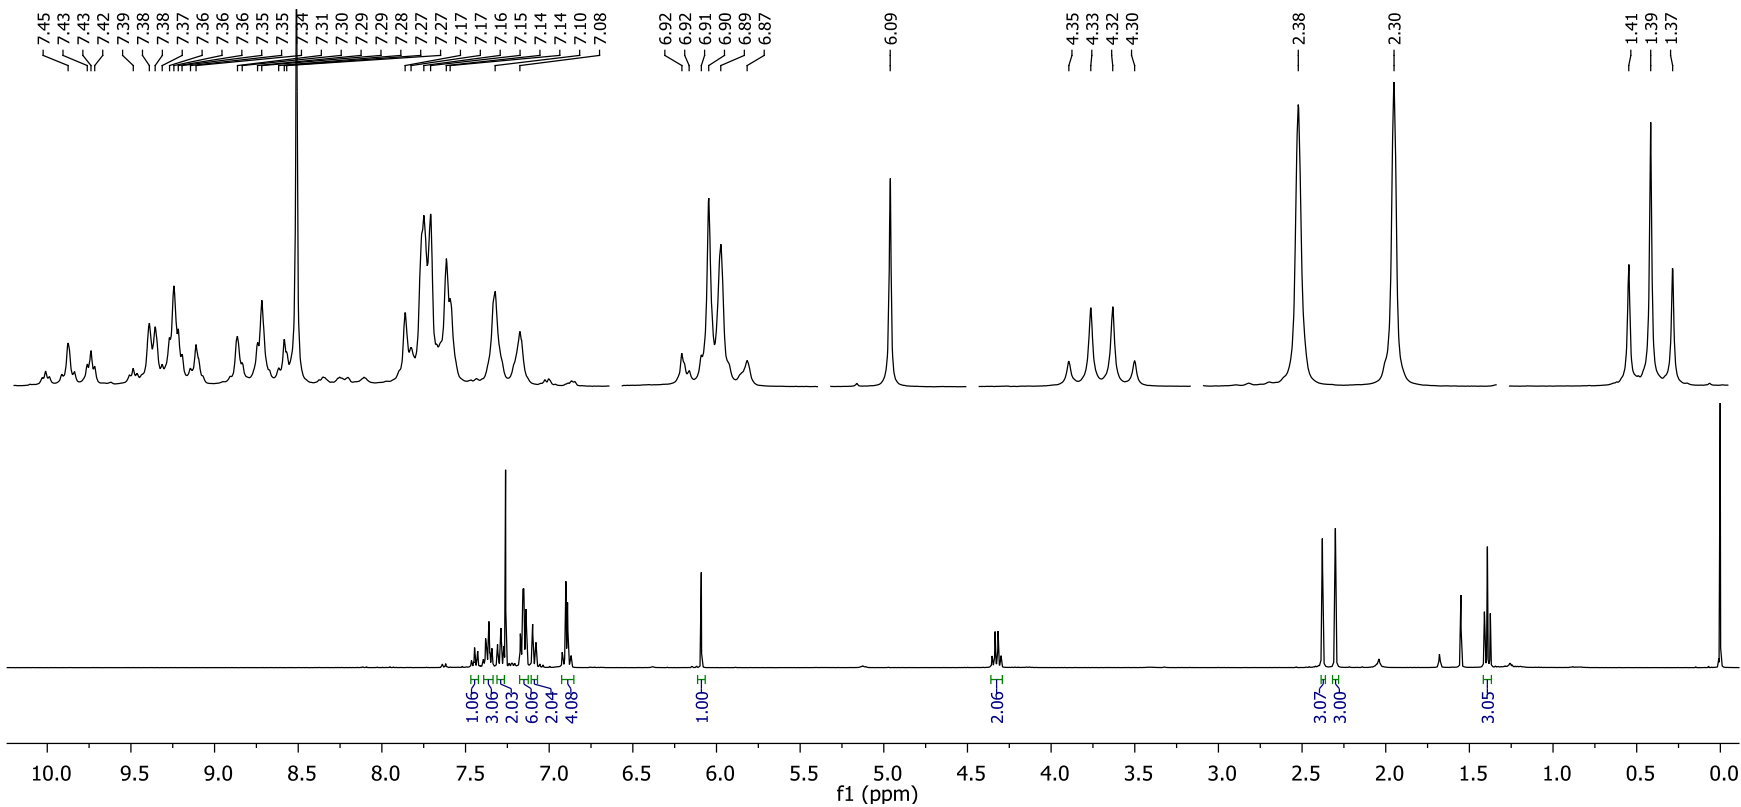

IB355-4

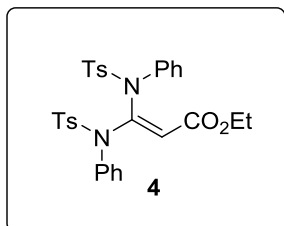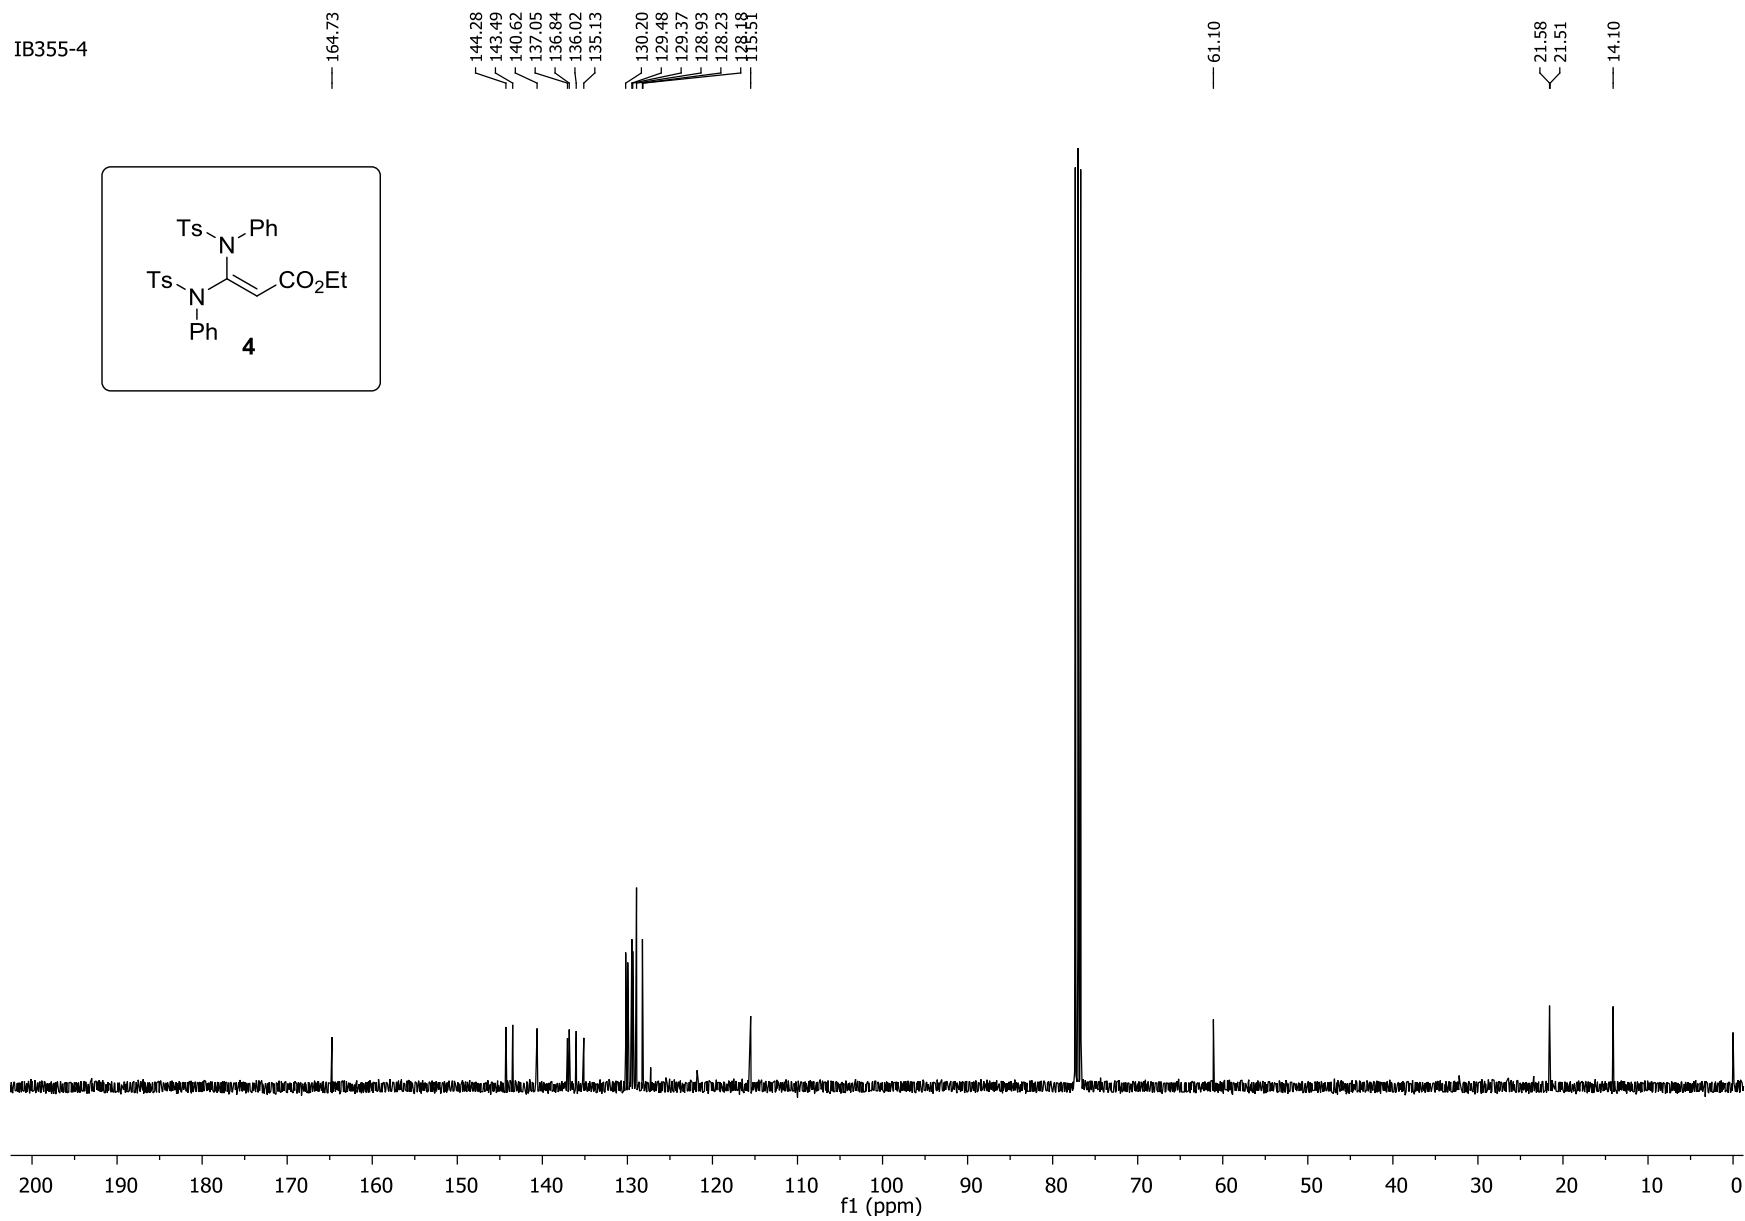

IB355-2F1

8.38  
8.35  
7.58  
7.55  
7.40  
7.39  
7.39  
7.38  
7.37  
7.30  
6.98  
6.94  
6.93  
6.93  
6.92

4.63  
4.60  
4.17  
4.15  
4.13  
4.11

2.44

1.25  
1.24  
1.22

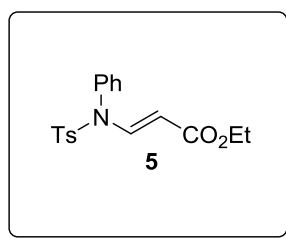

8.38  
8.35

7.58  
7.57  
7.55  
7.42  
7.41  
7.40  
7.40  
7.39  
7.39  
7.38  
7.38  
7.37  
7.36  
7.30  
7.28  
7.28

6.95  
6.94  
6.94  
6.93  
6.93  
6.92  
6.92

4.63  
4.60

4.17  
4.15  
4.13  
4.11

2.44

1.25  
1.24  
1.22

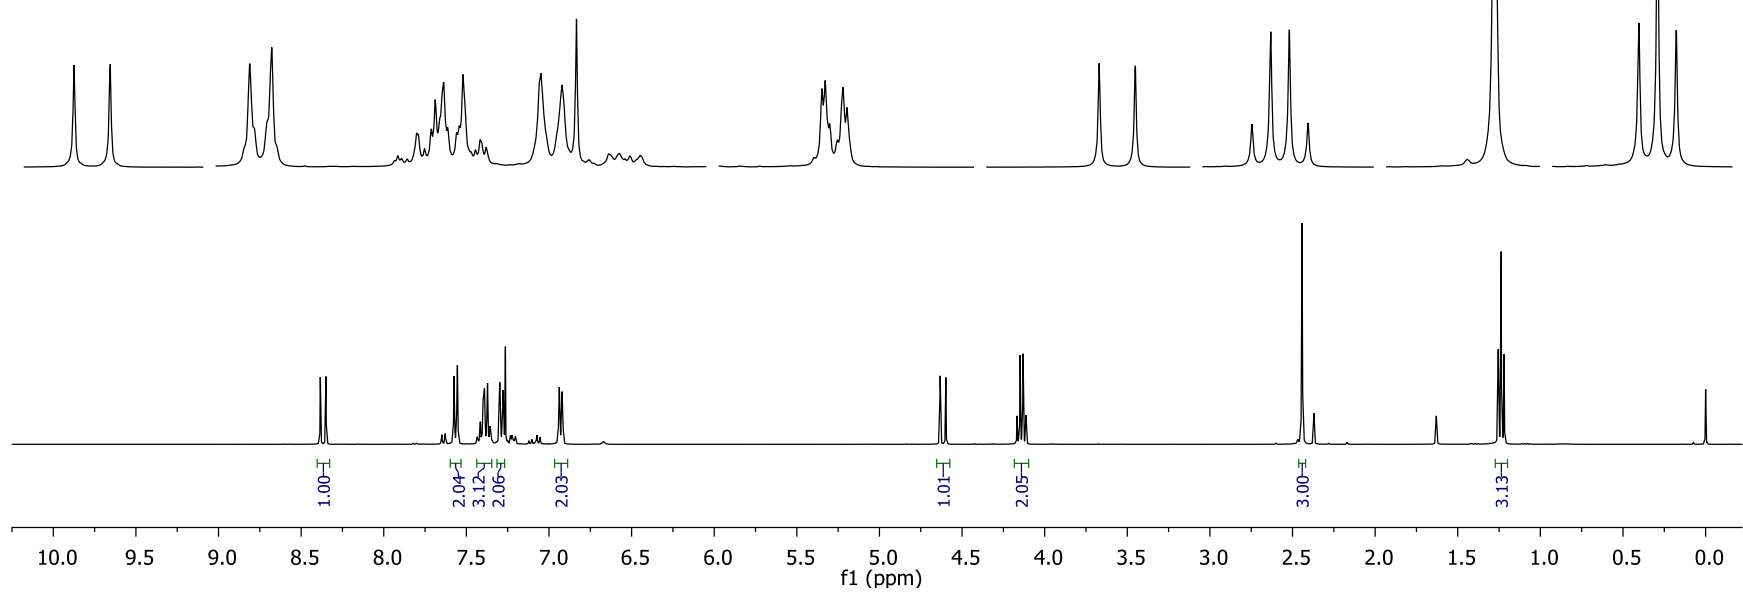

IB355-2F1

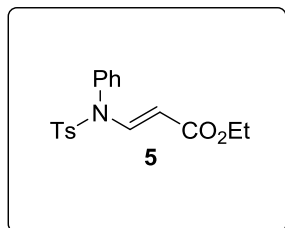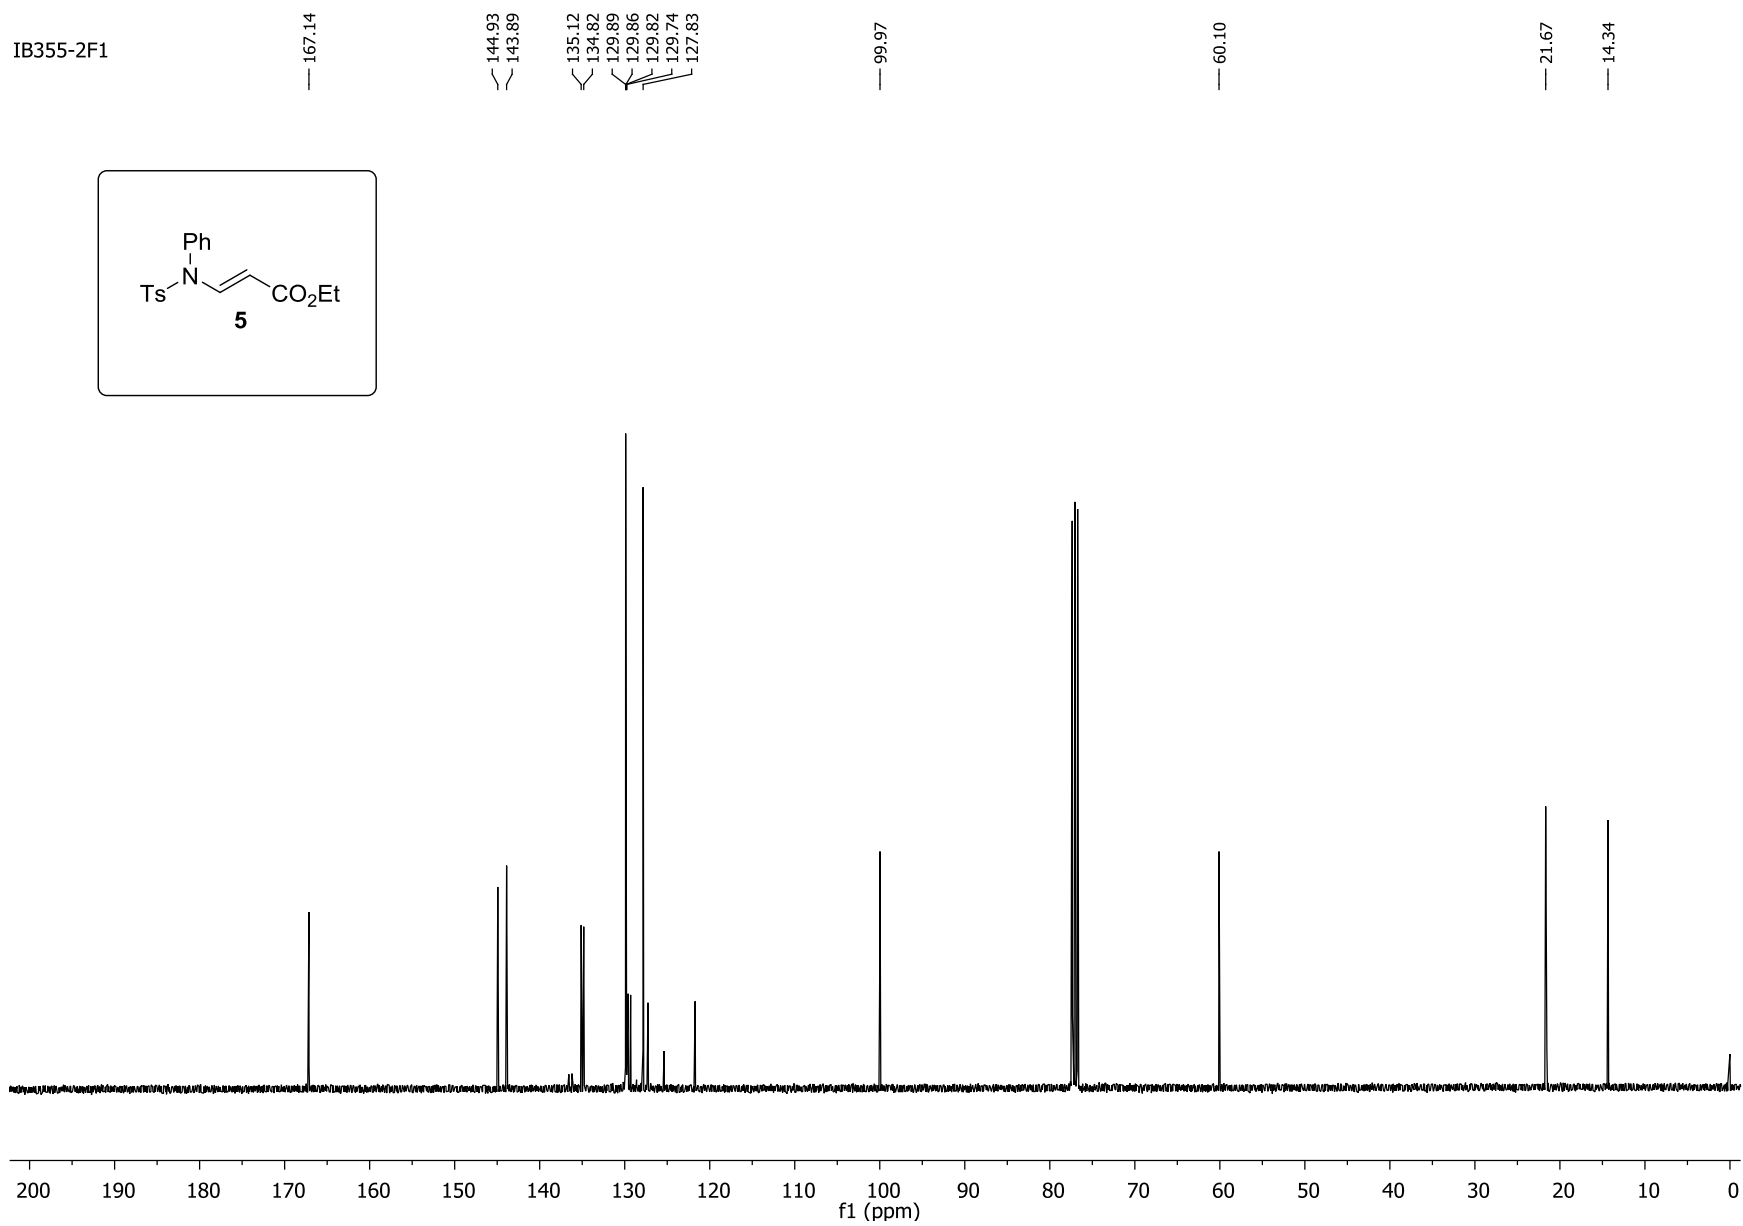

### Intramolecular Hydroarylation of Sulfonyl Ynamines. Products (*E*)-2b-k and 6

SS059-F3

9.11  
9.11  
9.10  
9.10  
9.10

7.83  
7.81  
7.61  
7.60  
7.59  
7.59  
7.58  
7.57  
7.55  
7.52  
7.50

5.71

2.57

1.05

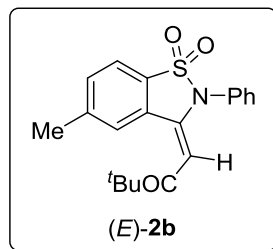

9.11  
9.11  
9.10  
9.10  
9.10

7.83

7.81

7.61

7.60

7.59

7.58

7.57

7.55

5.71

7.52

7.50

5.71

2.57

1.05

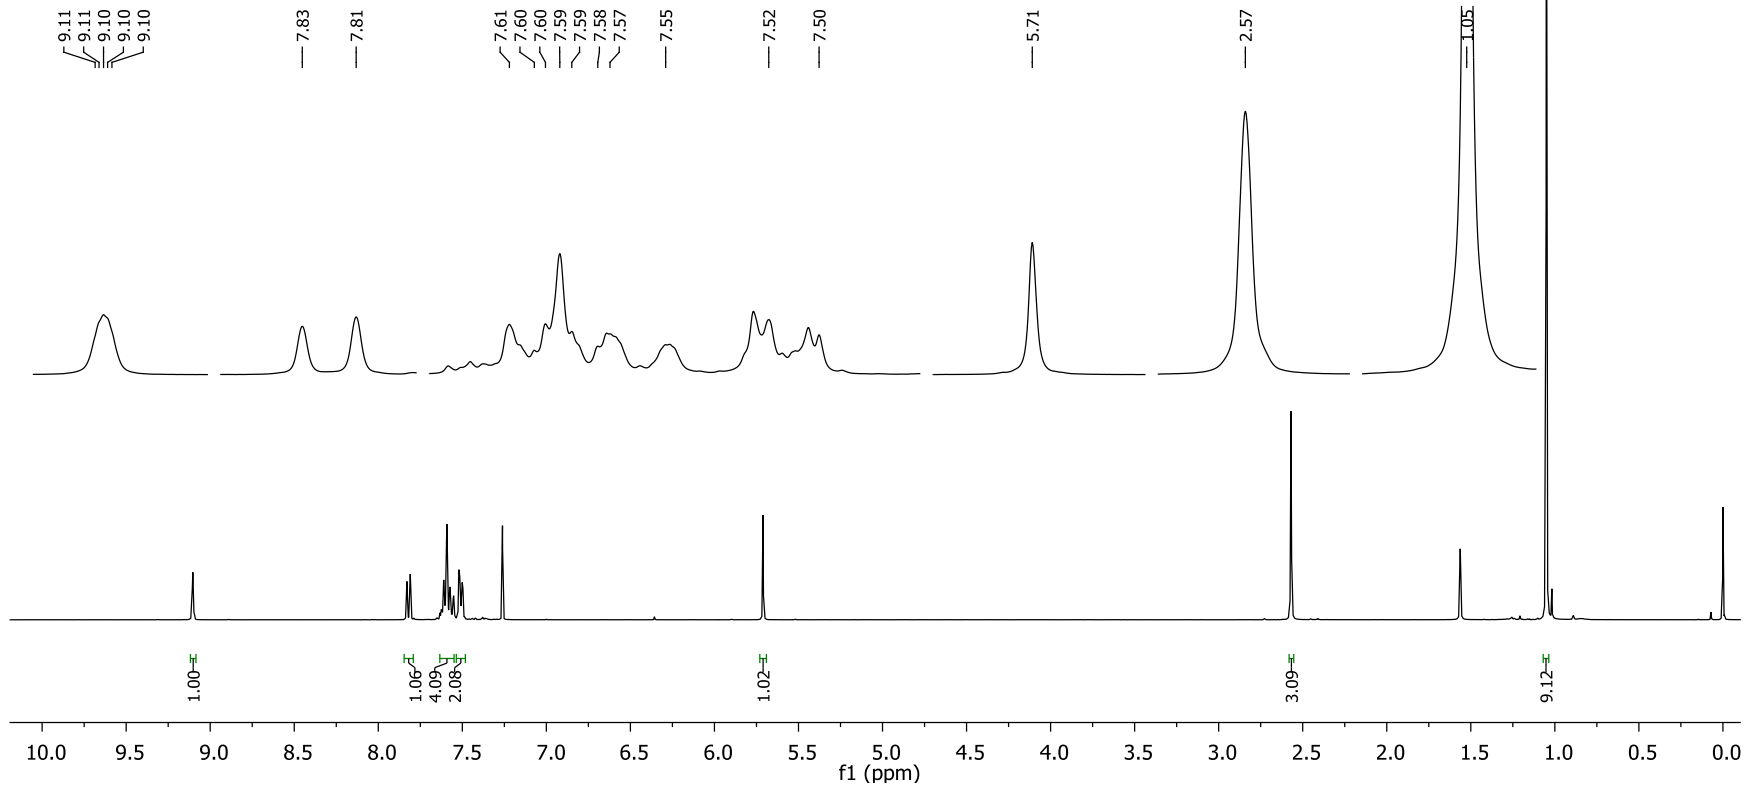



SS059-F3

— 204.28

145.63  
145.07

133.38  
130.86  
130.83  
130.56  
130.50  
130.40  
129.39

— 101.49

— 44.67

— 26.83

— 22.27

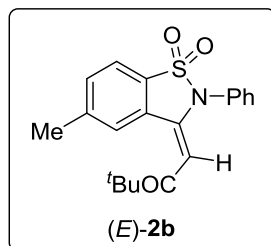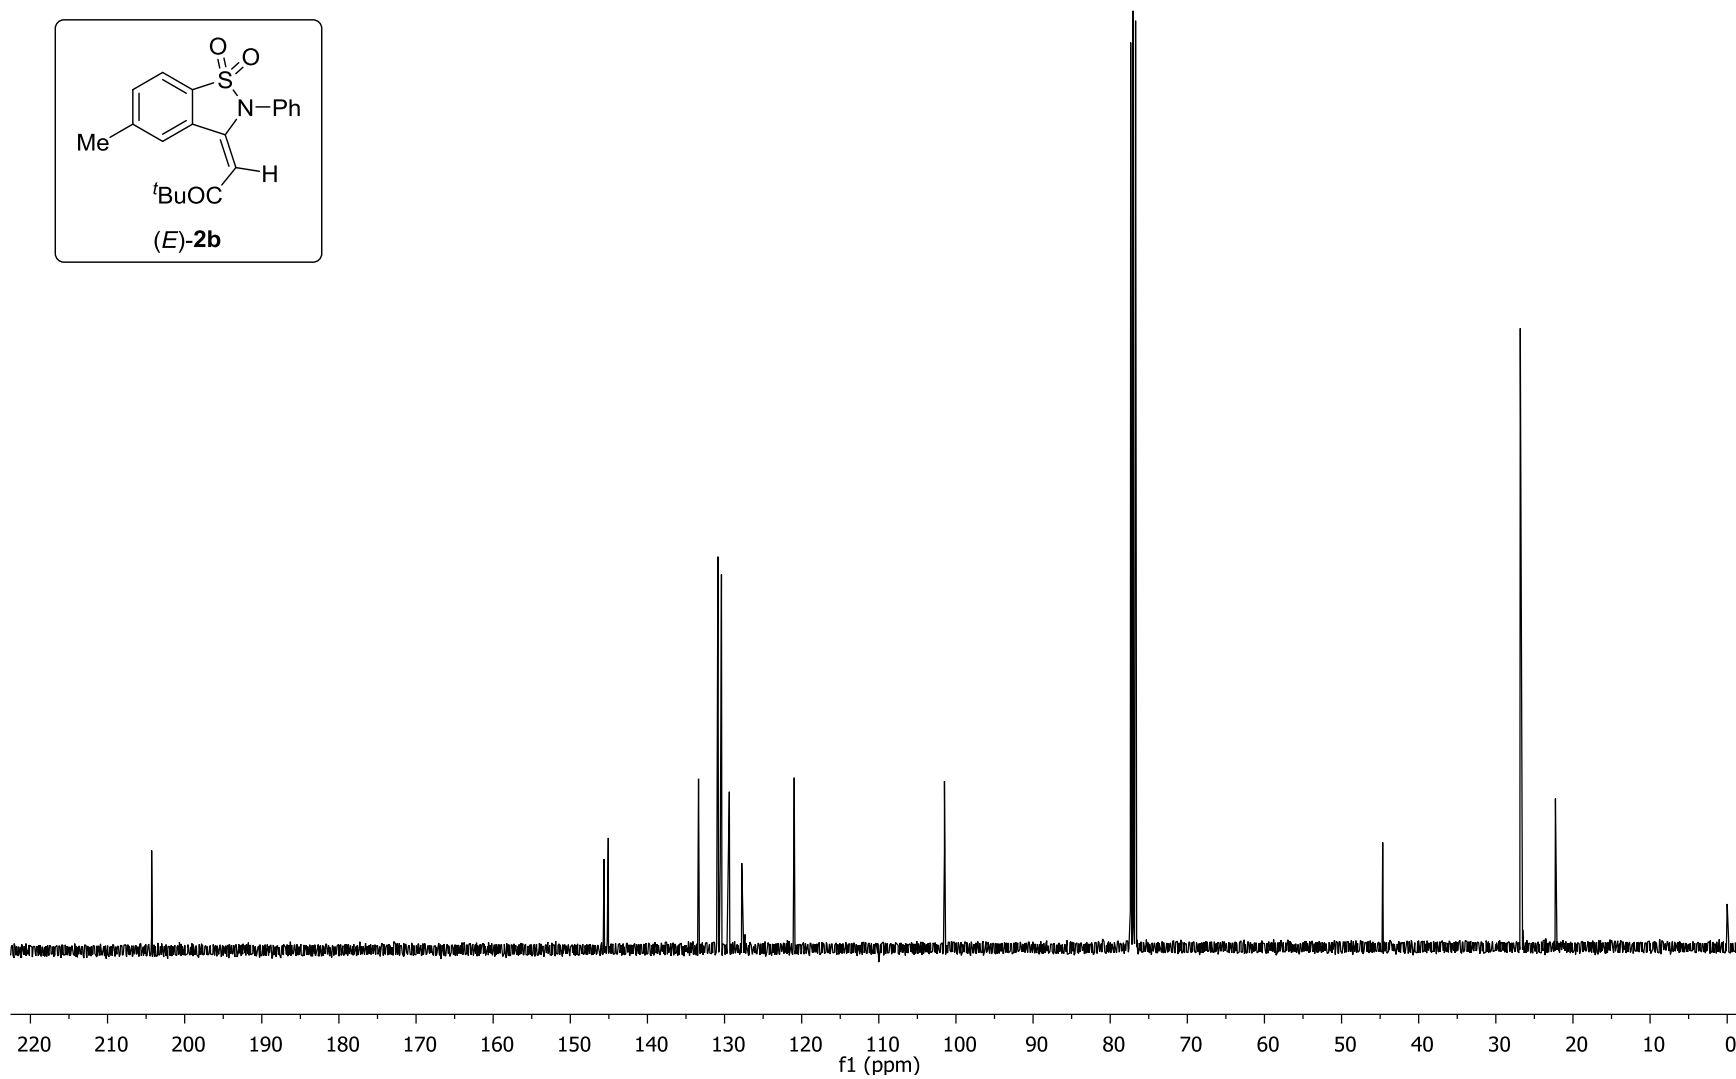

Sel1d SS059-F3  
1D Selective Gradient NOESY  
freq: 5.735ppm 1 1

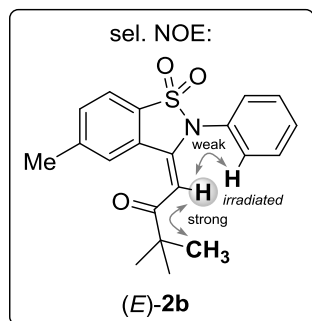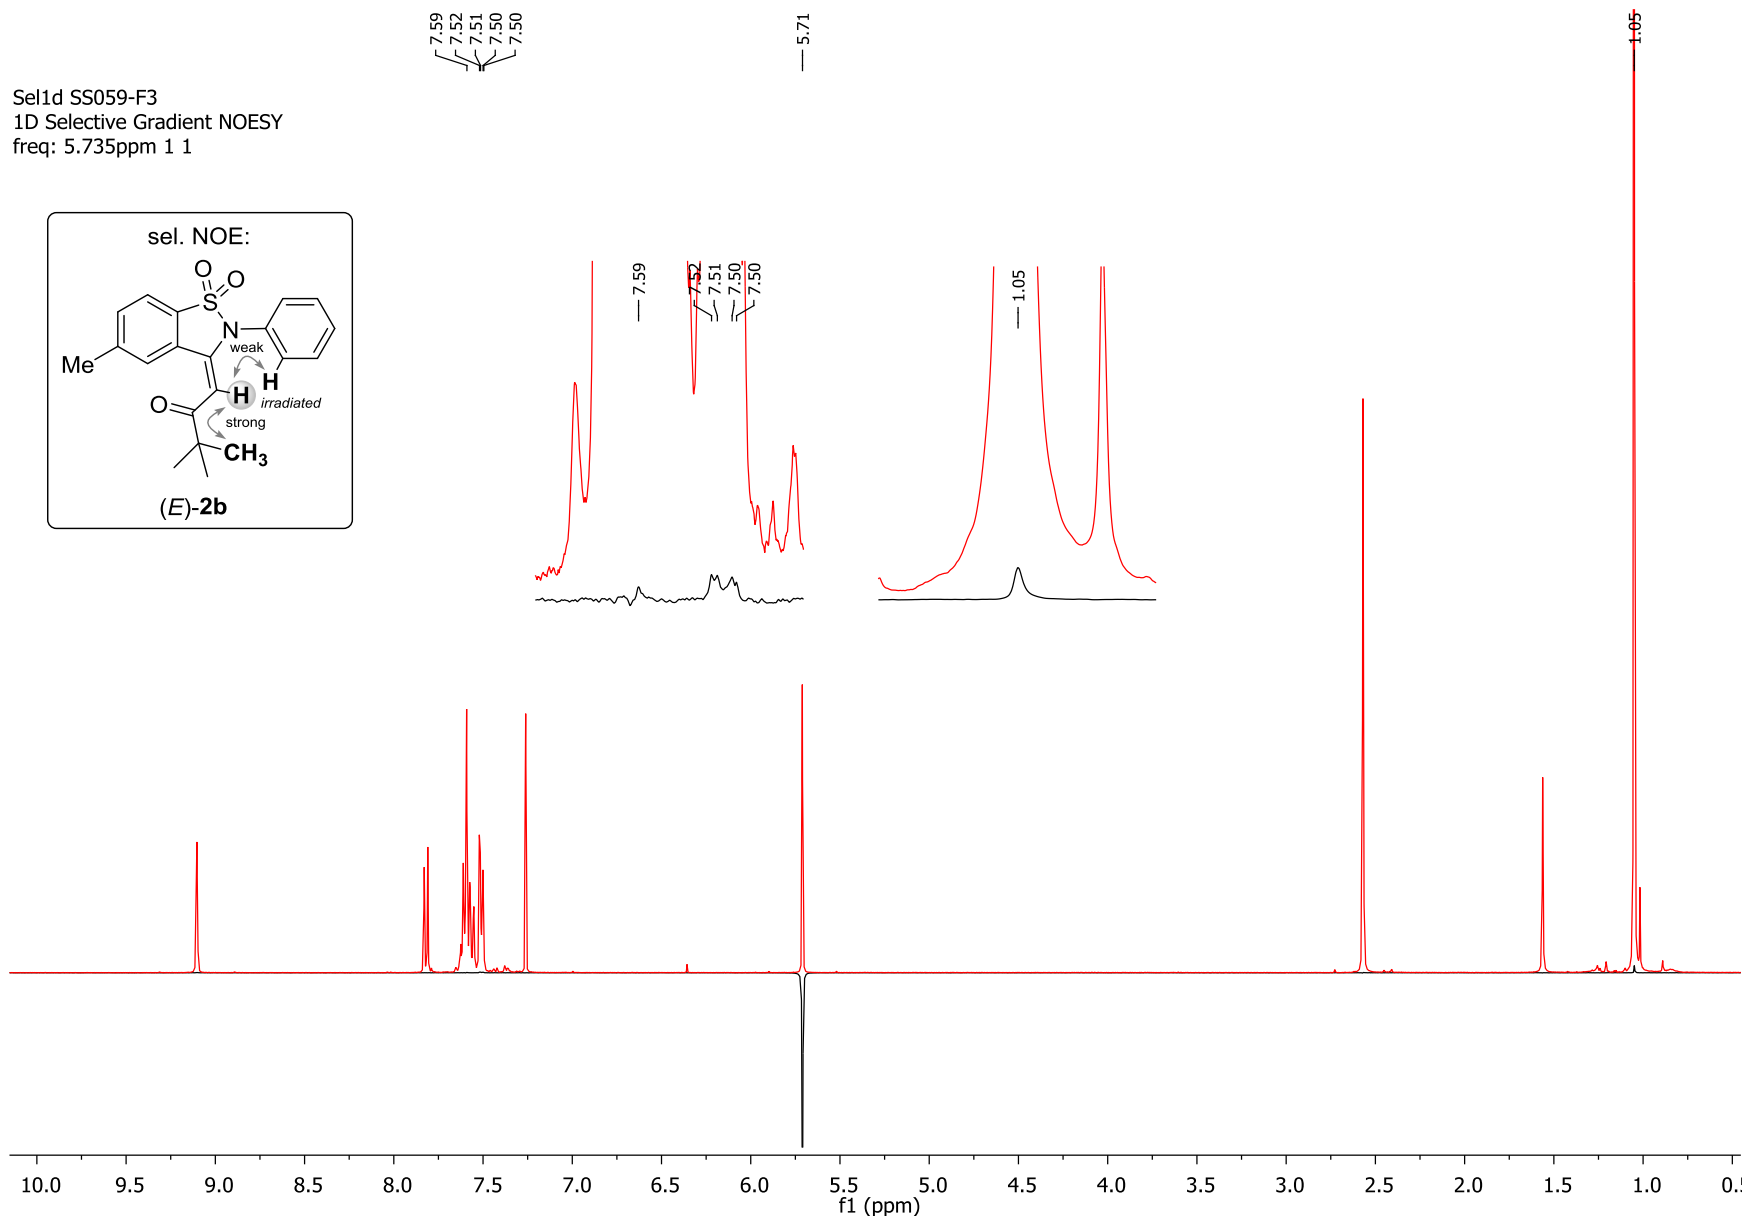

IB365-1F1

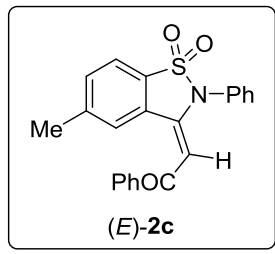

9.00  
9.00  
9.00  
7.86  
7.84  
7.77  
7.75  
7.65  
7.63  
7.61  
7.59  
7.57  
7.56  
7.54  
7.53  
7.52  
7.50  
7.43  
7.42  
7.41  
7.39  
7.39

6.09

2.56

9.00  
9.00  
9.00

7.86  
7.84

7.77  
7.75  
7.75

7.65

7.63  
7.61  
7.59  
7.57  
7.56

7.54  
7.53  
7.52  
7.50

7.43  
7.42  
7.41  
7.39  
7.39

6.09

2.56

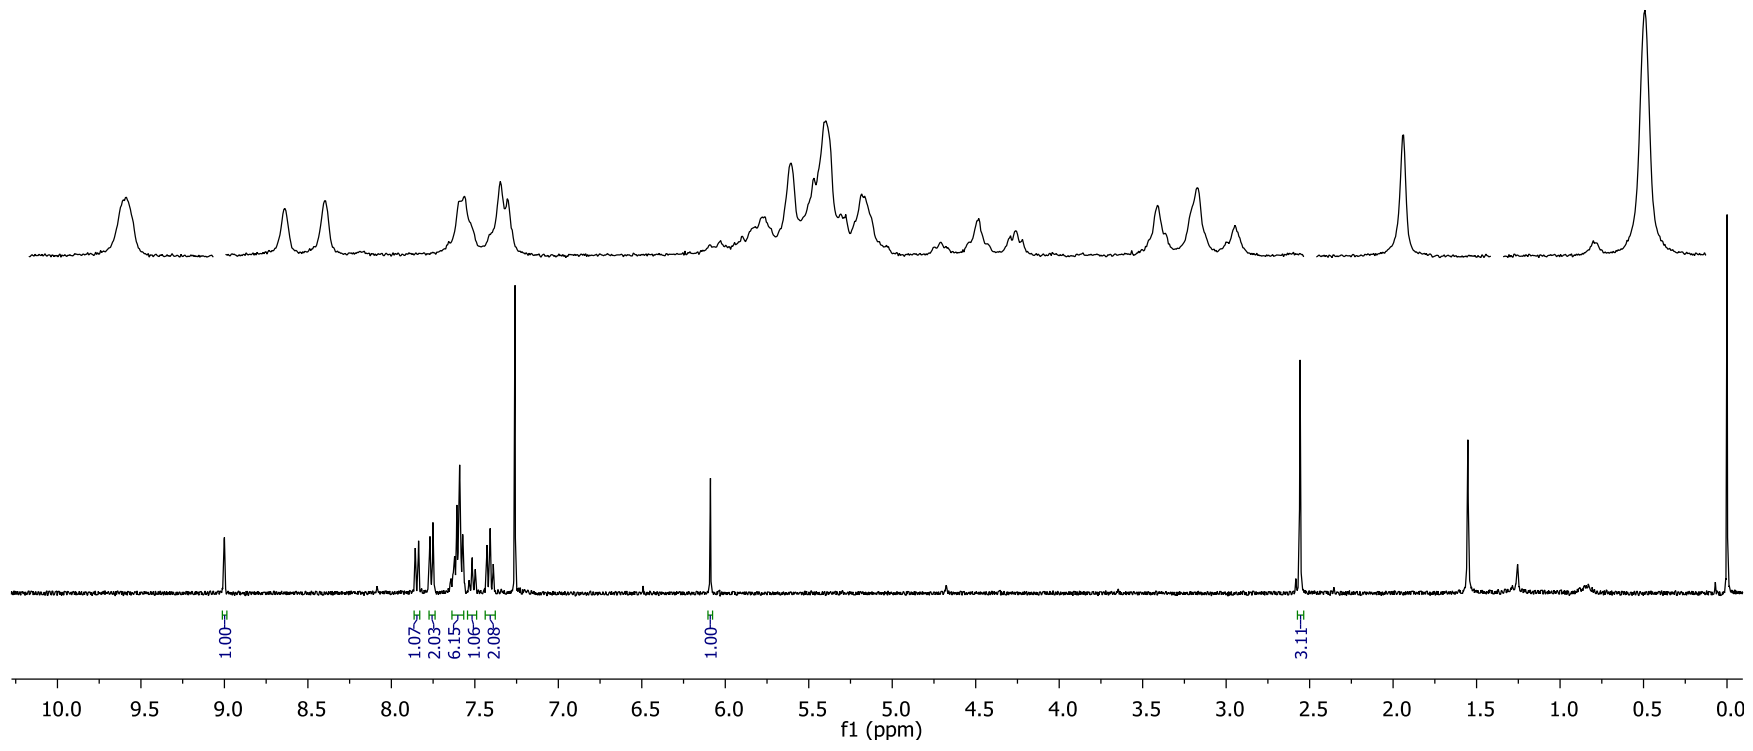

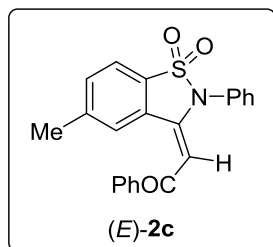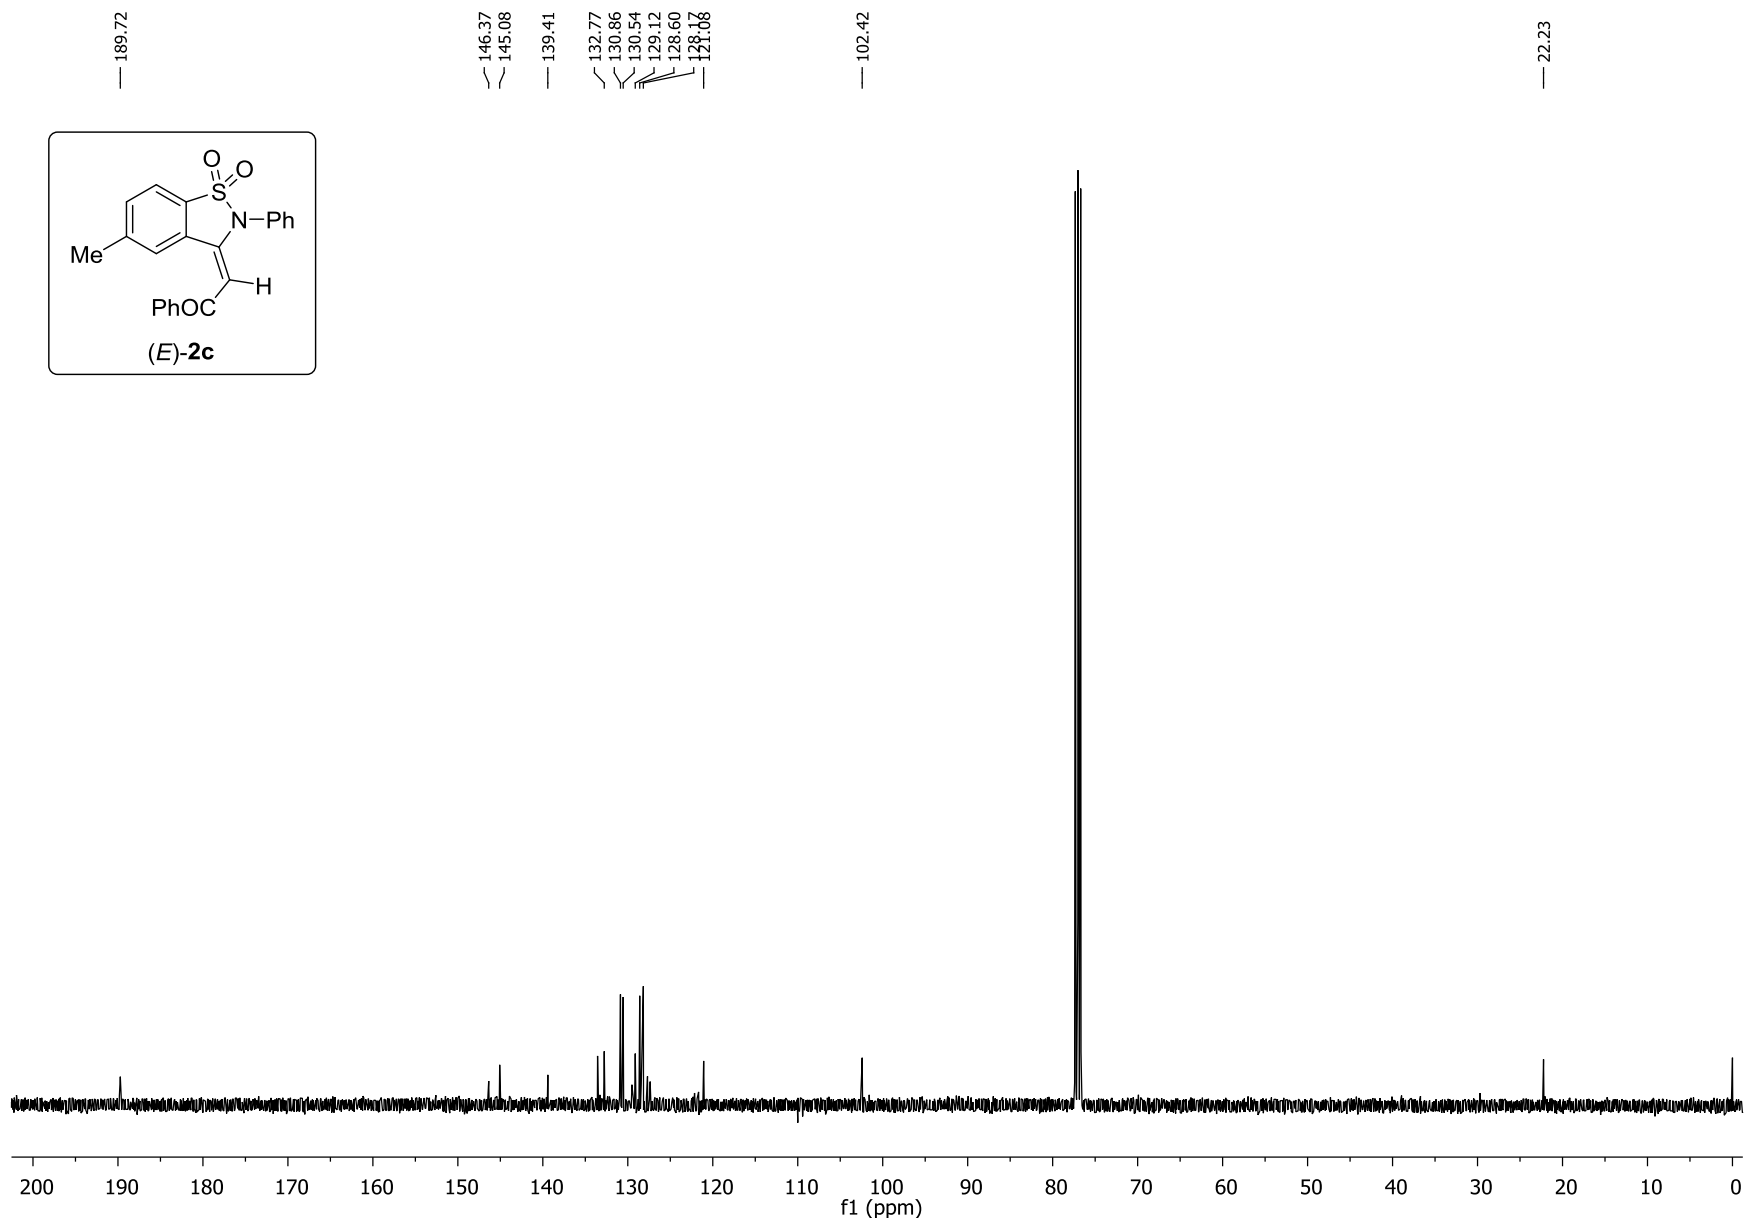

Sel1d IB365-1F1  
1D Selective Gradient NOESY  
freq: 6.115ppm 1 1

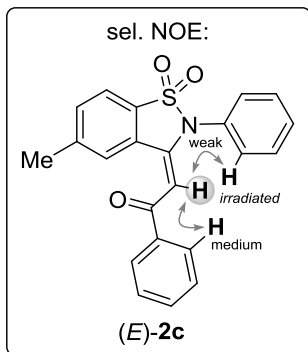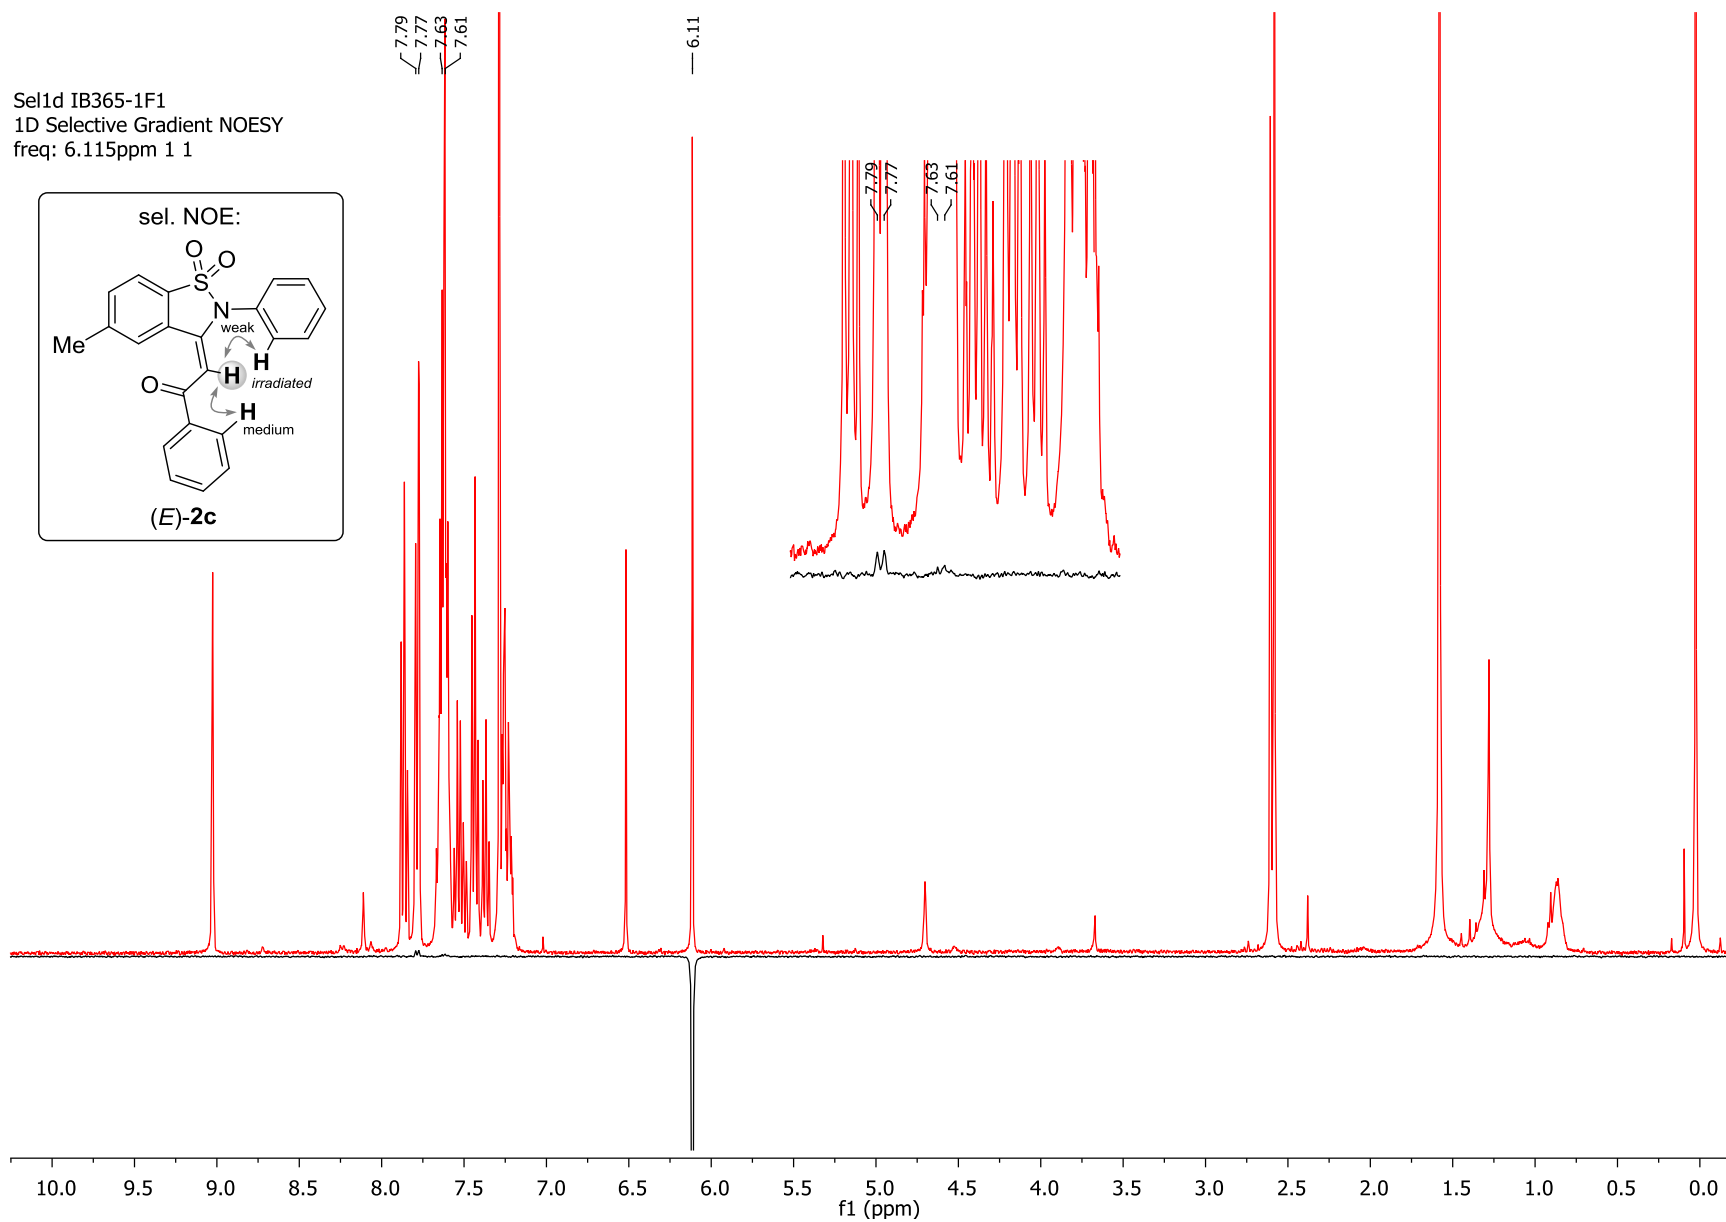

IB375-1

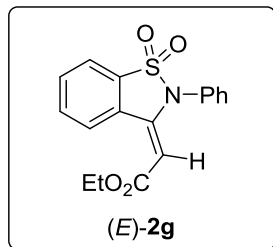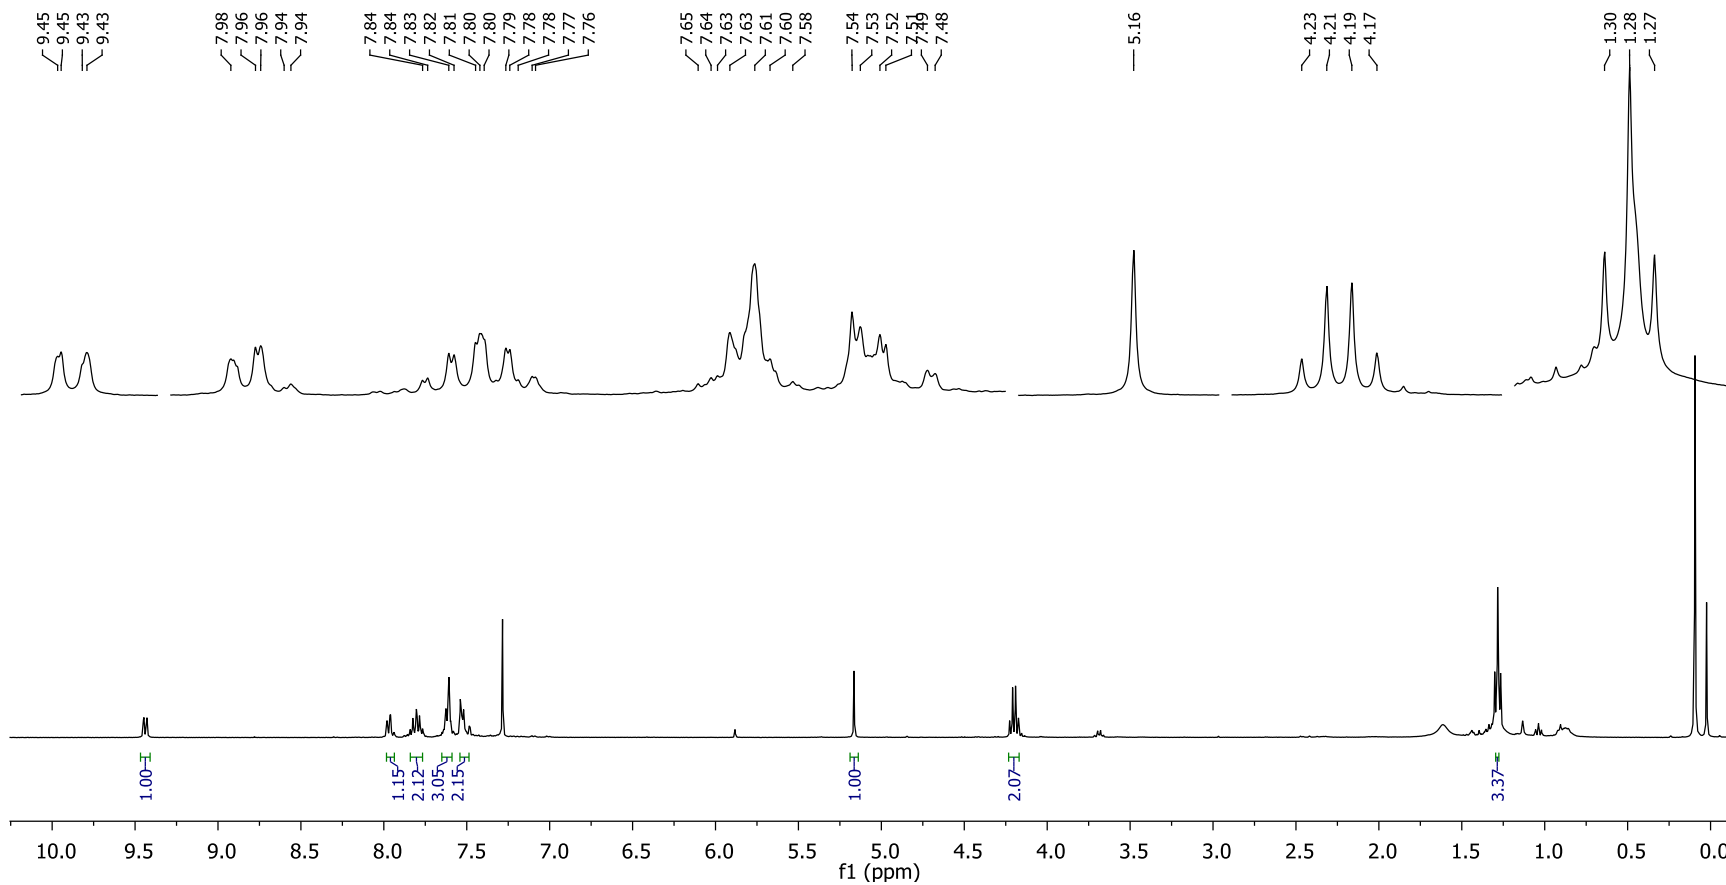

IB375-1F1

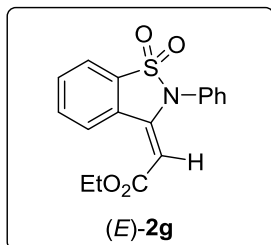

— 166.27

— 146.19

133.91  
132.52  
131.18  
130.72  
130.61  
130.46  
129.85  
127.43  
— 121.33

— 97.56

— 60.71

— 14.38

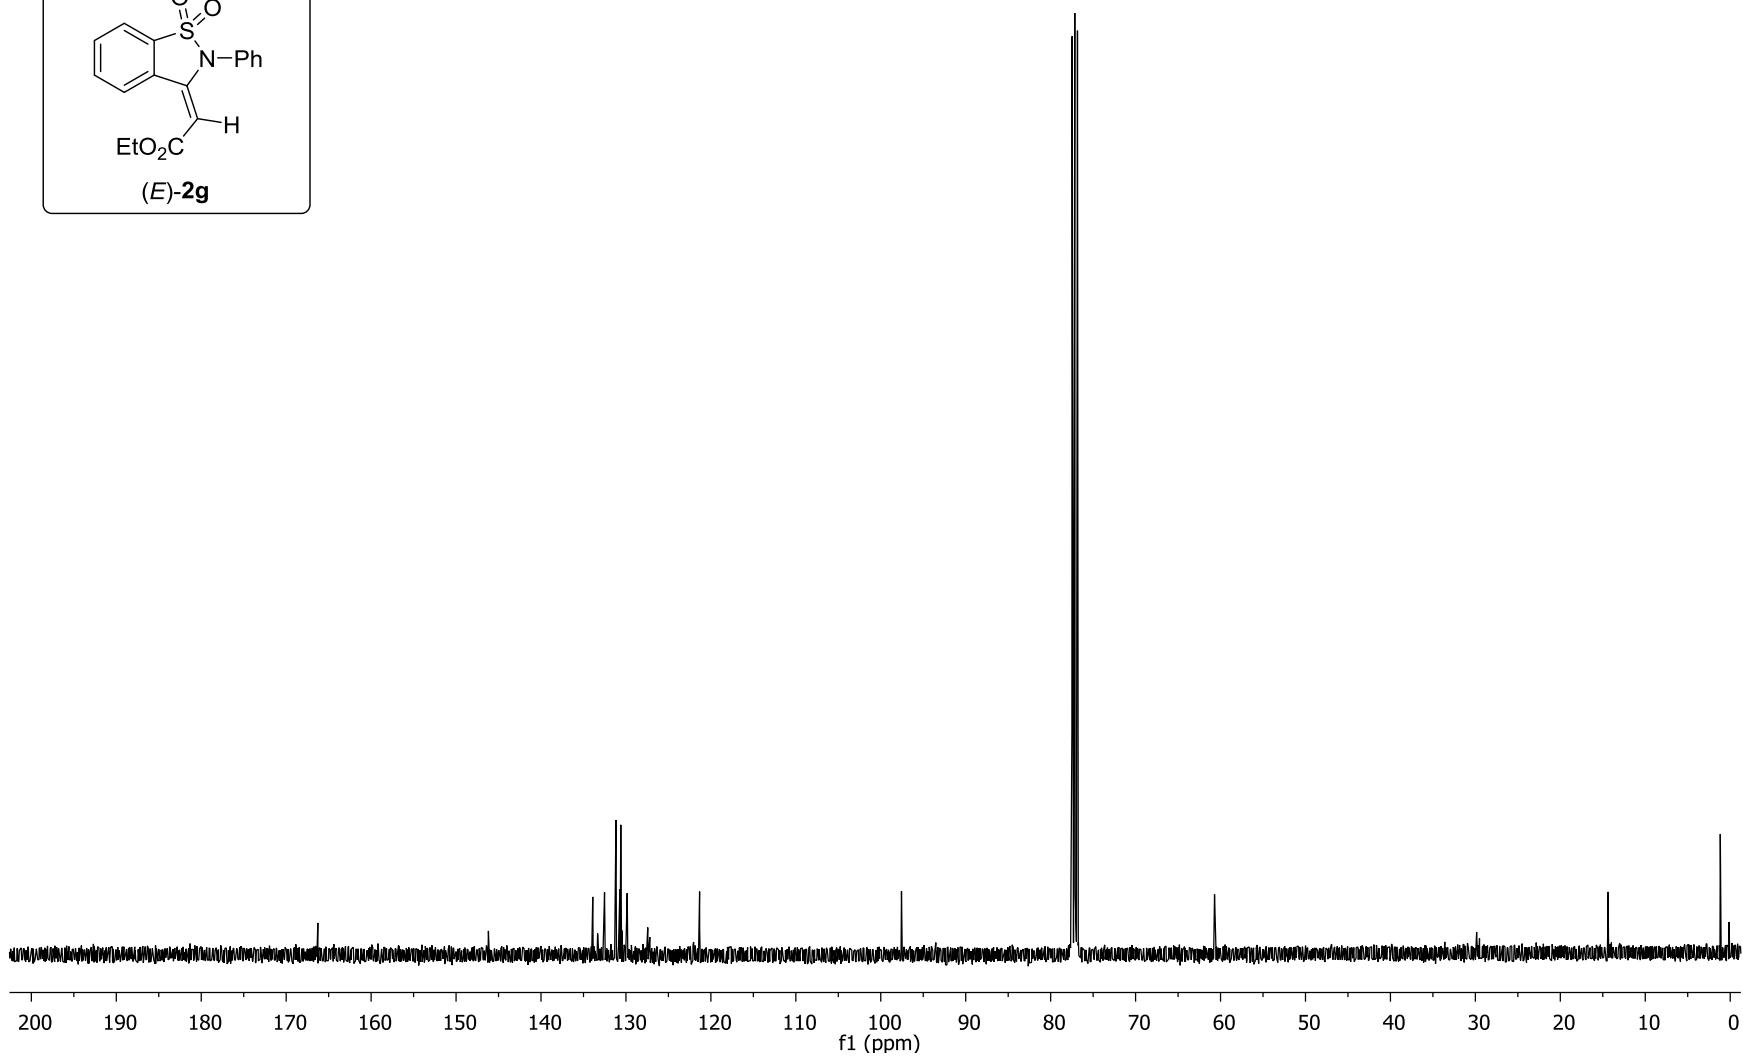

Sel1d IB375-1  
1D Selective Gradient NOESY  
freq: 9.439ppm 1 1

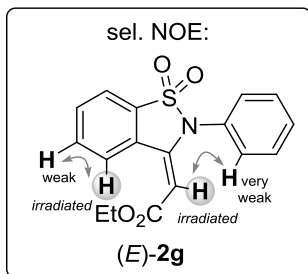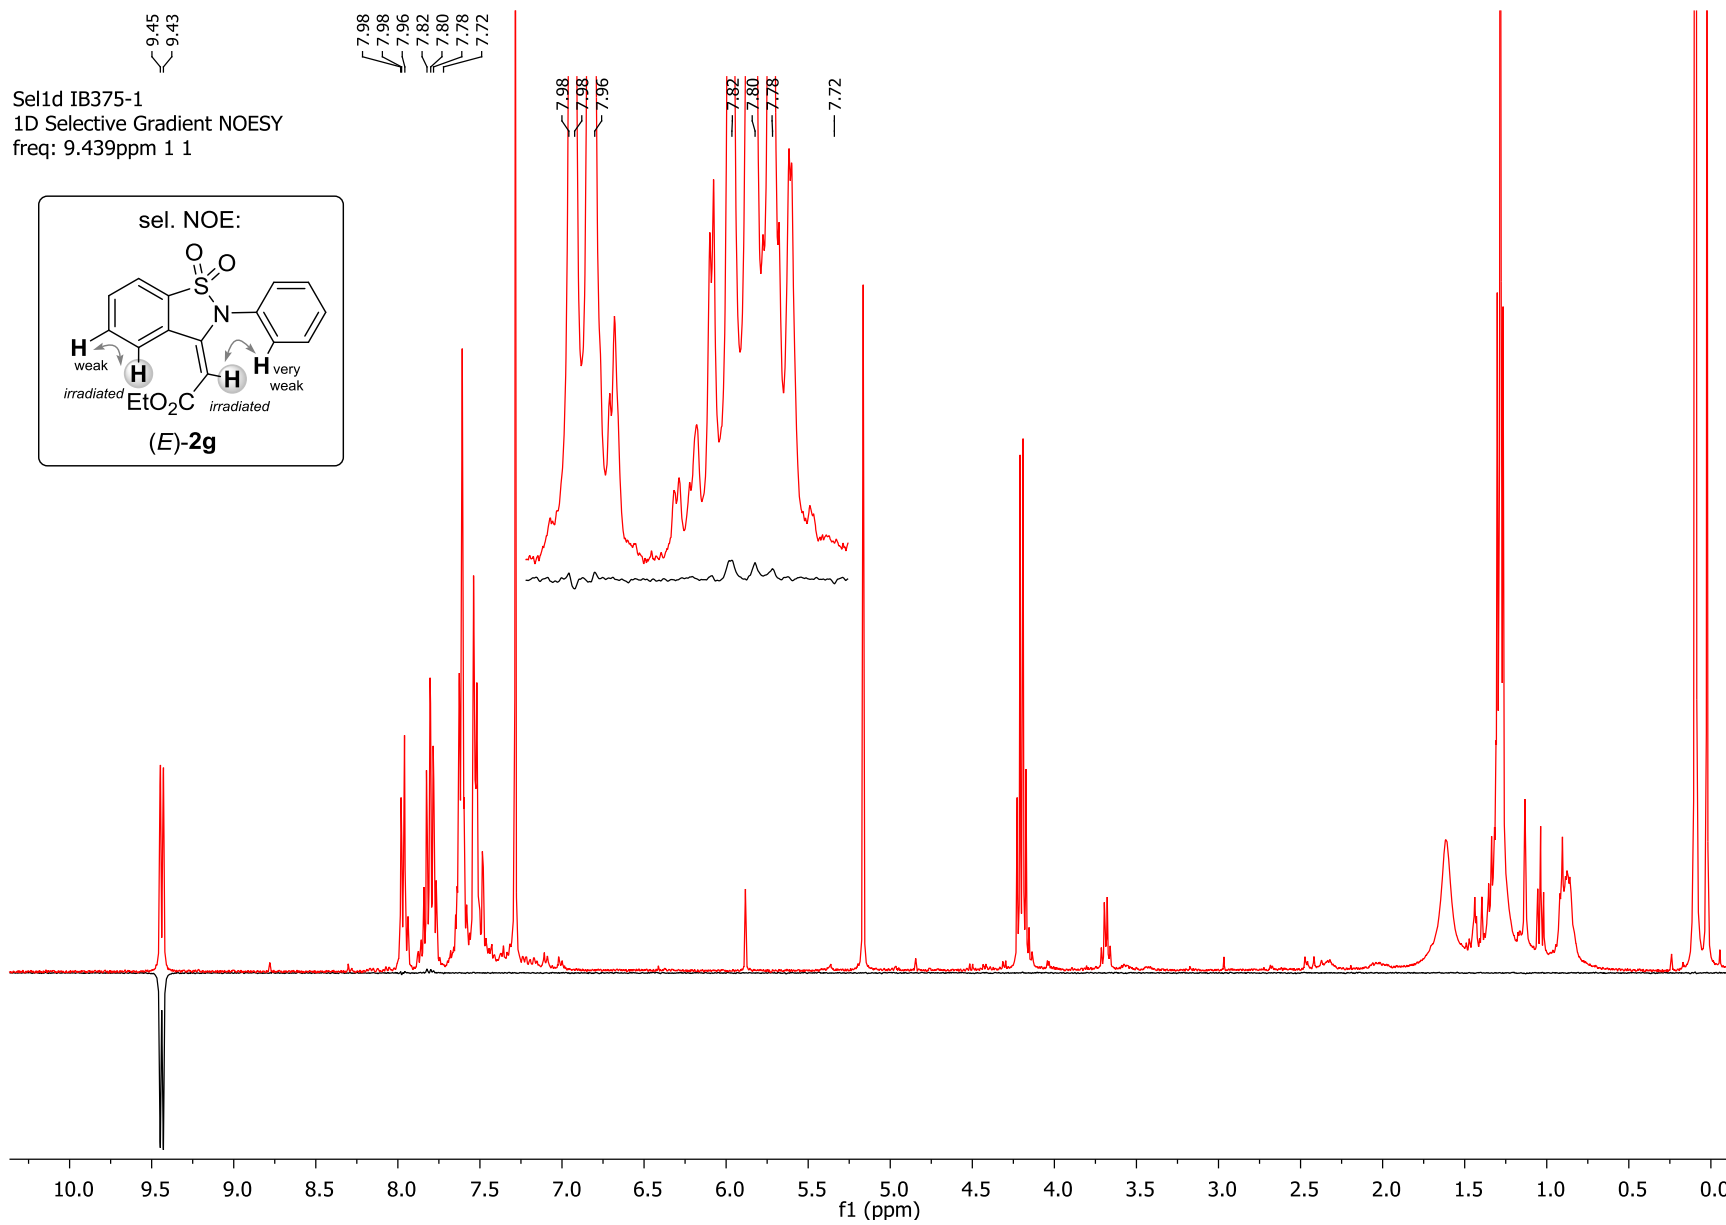



IB370-1F3

9.14  
9.14  
7.84  
7.81  
7.61  
7.61  
7.60  
7.59  
7.59  
7.58  
7.58  
7.57  
7.57  
7.56  
7.56  
7.55  
7.54  
7.50  
7.50  
7.49  
7.49  
7.49  
7.48  
7.48  
7.26  
7.26  
7.24  
7.24

5.12

4.19  
4.17  
4.15  
4.13  
3.98

1.27  
1.25  
1.23

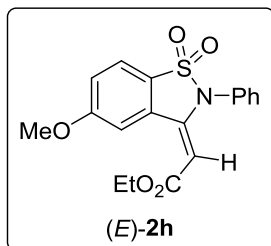

9.14  
9.14  
7.84  
7.81  
7.61  
7.61  
7.60  
7.59  
7.59  
7.58  
7.58  
7.57  
7.57  
7.56  
7.56  
7.50  
7.50  
7.49  
7.49  
7.49  
7.48  
7.48

7.26  
7.26  
7.24  
7.24

5.12

4.19  
4.17  
4.15  
4.13

3.98

1.27  
1.25  
1.23

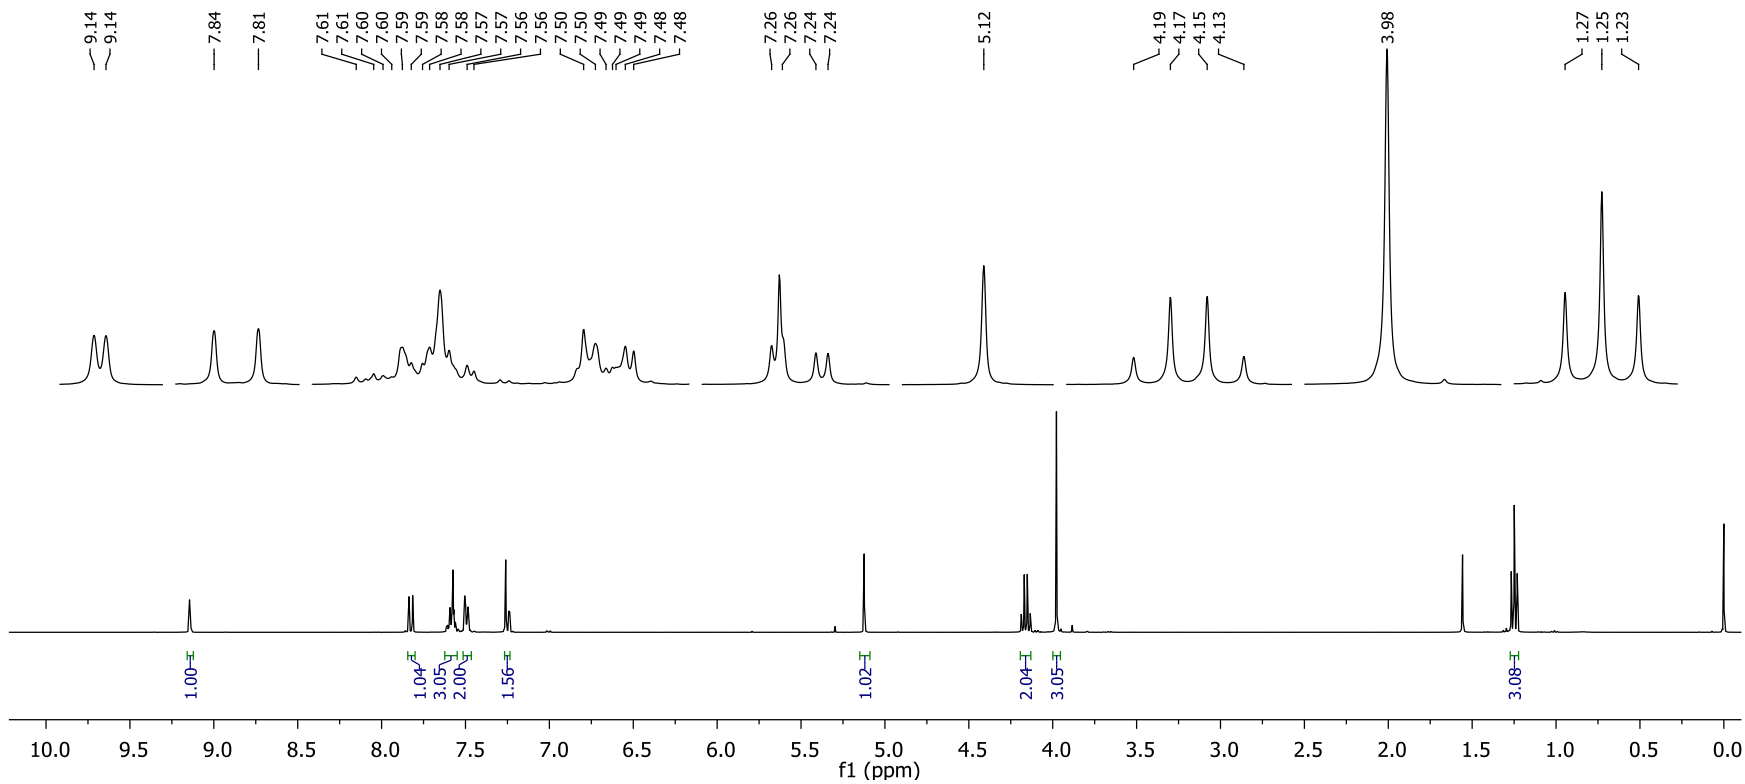

IB370-1F3

— 166.22  
— 163.99

— 146.28

— 131.02  
— 130.53  
— 130.49  
— 130.43  
— 129.63  
— 125.11  
— 122.42  
— 119.69  
— 113.39

— 97.19

— 60.53  
— 56.09

— 14.25

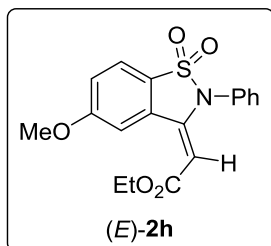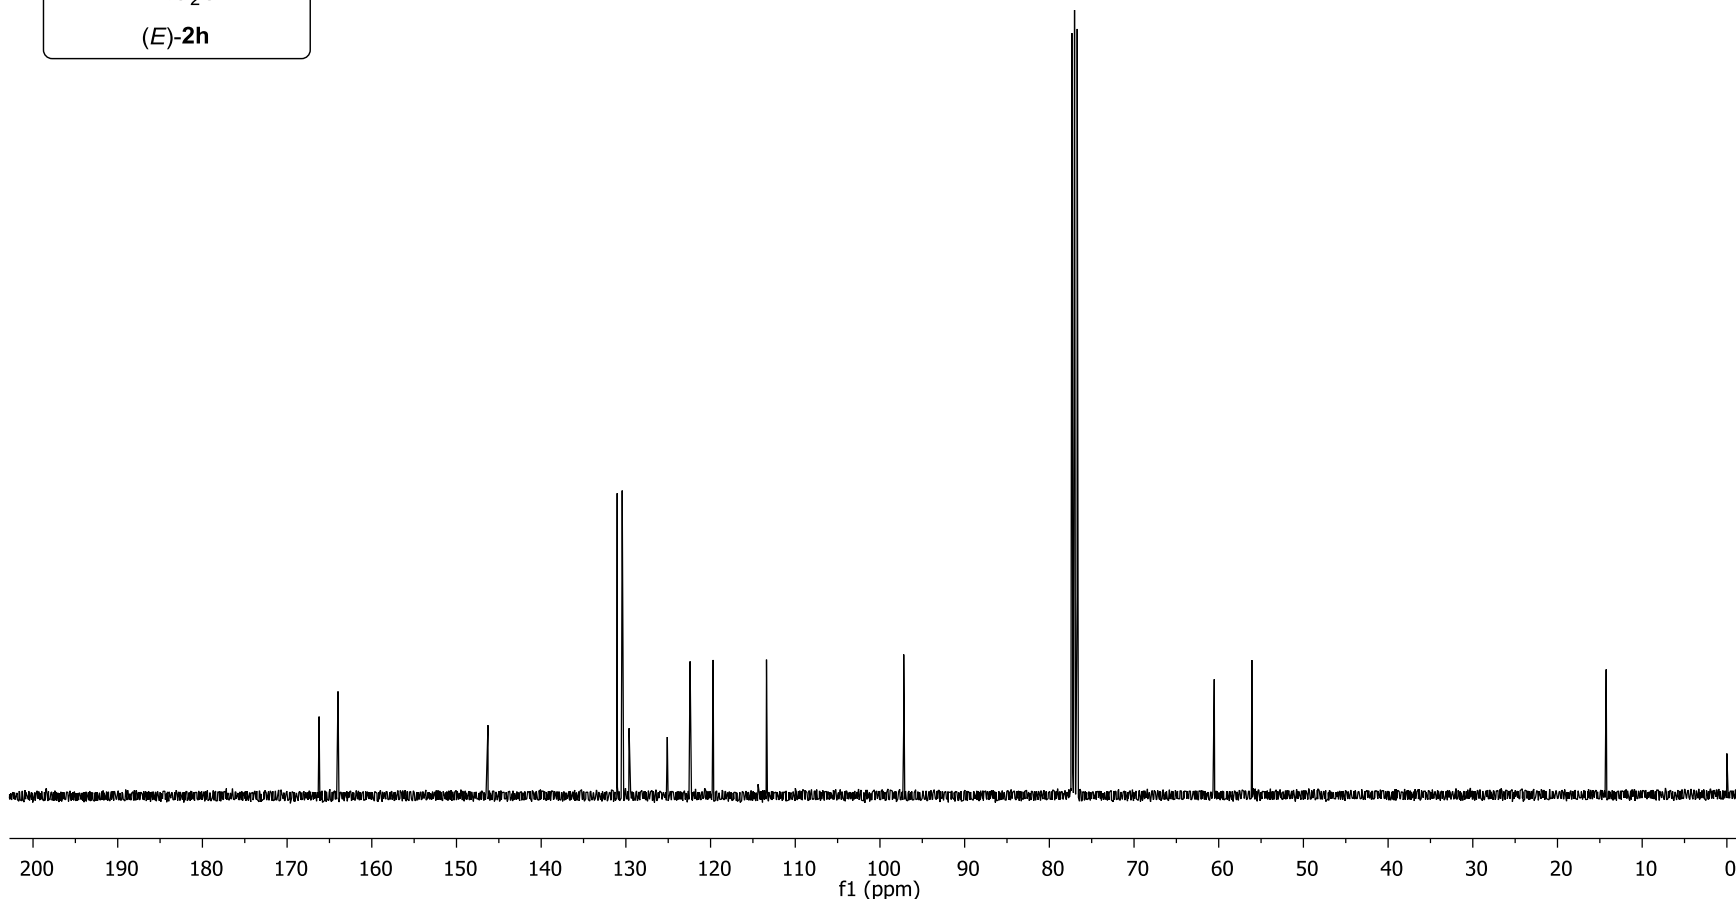

Sel1d IB370-1F3  
1D Selective Gradient NOESY  
freq: 9.164ppm 1 1

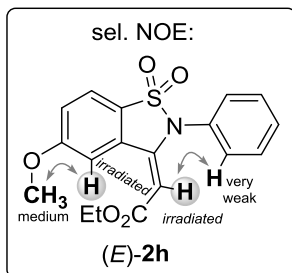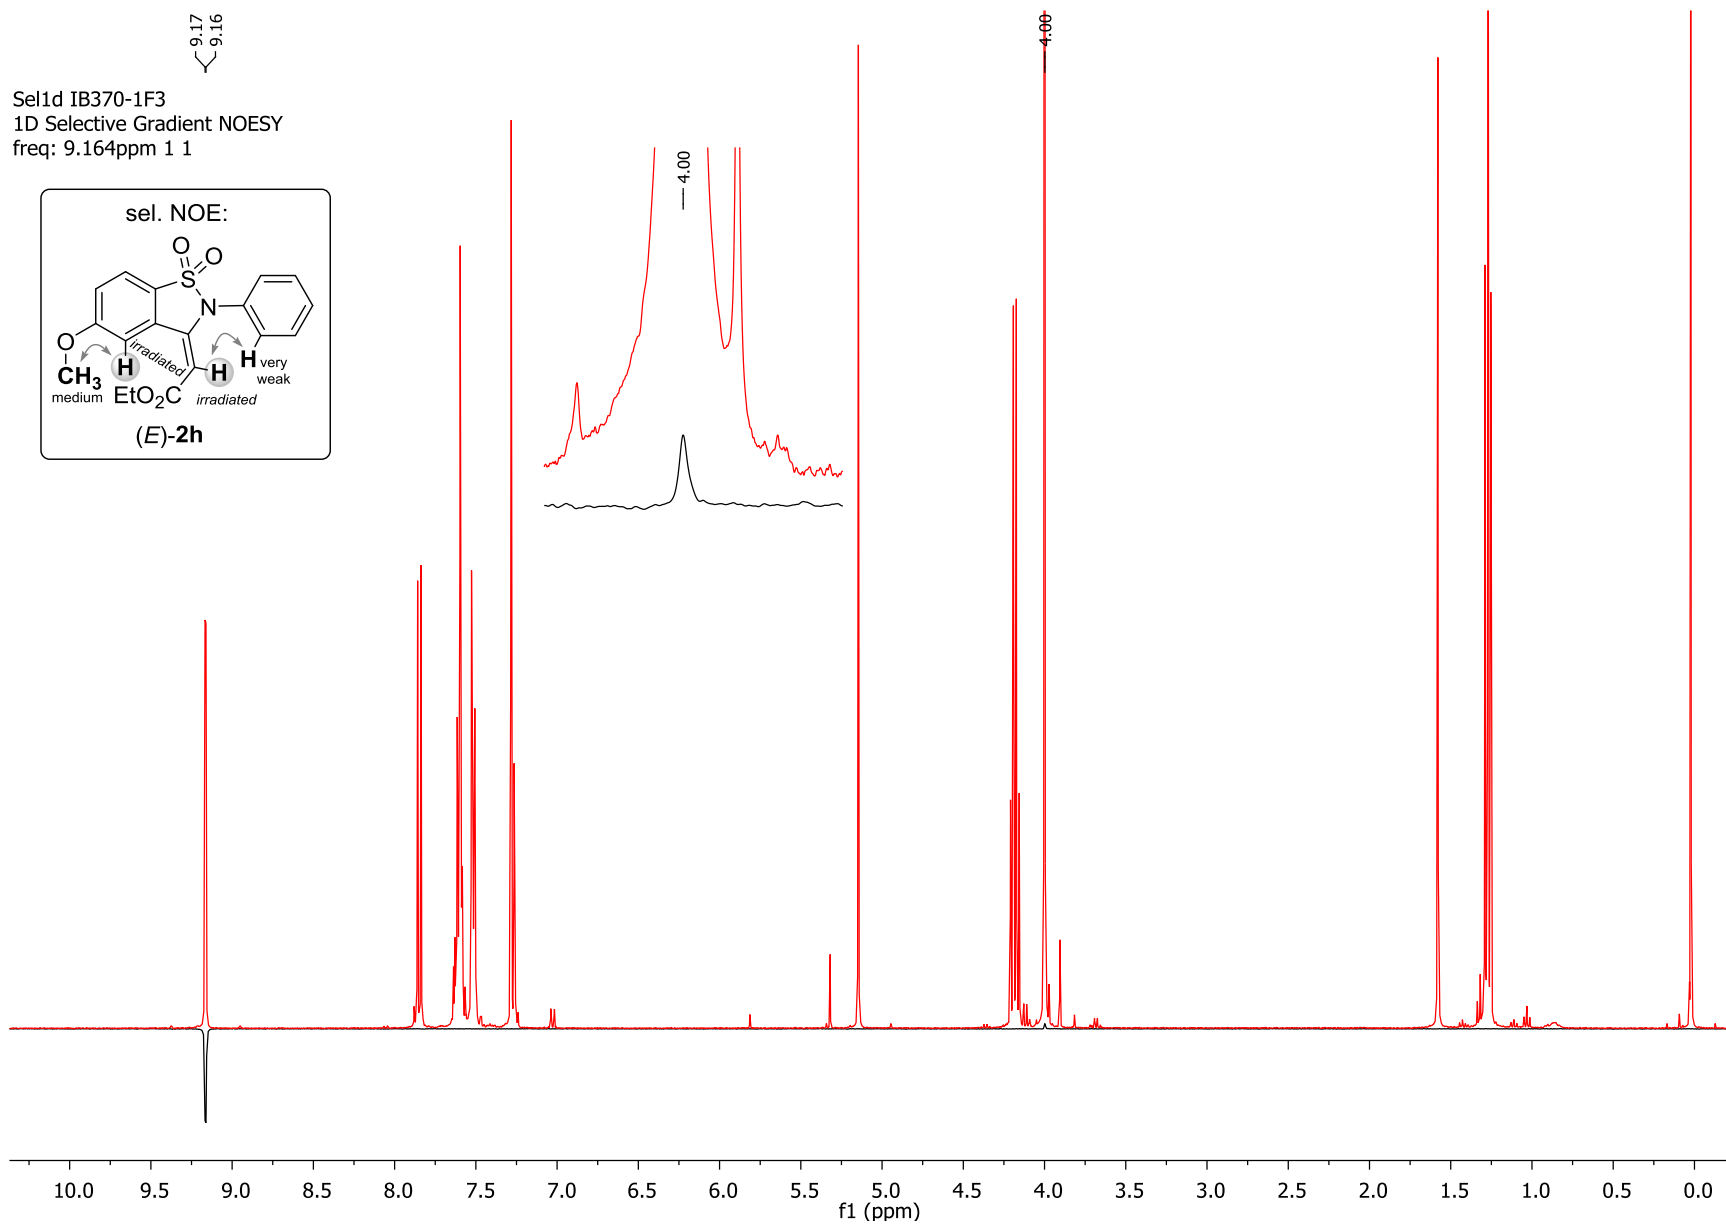

IB379-1F2

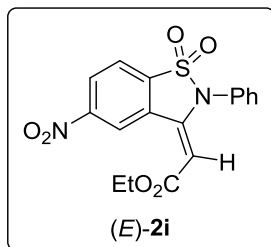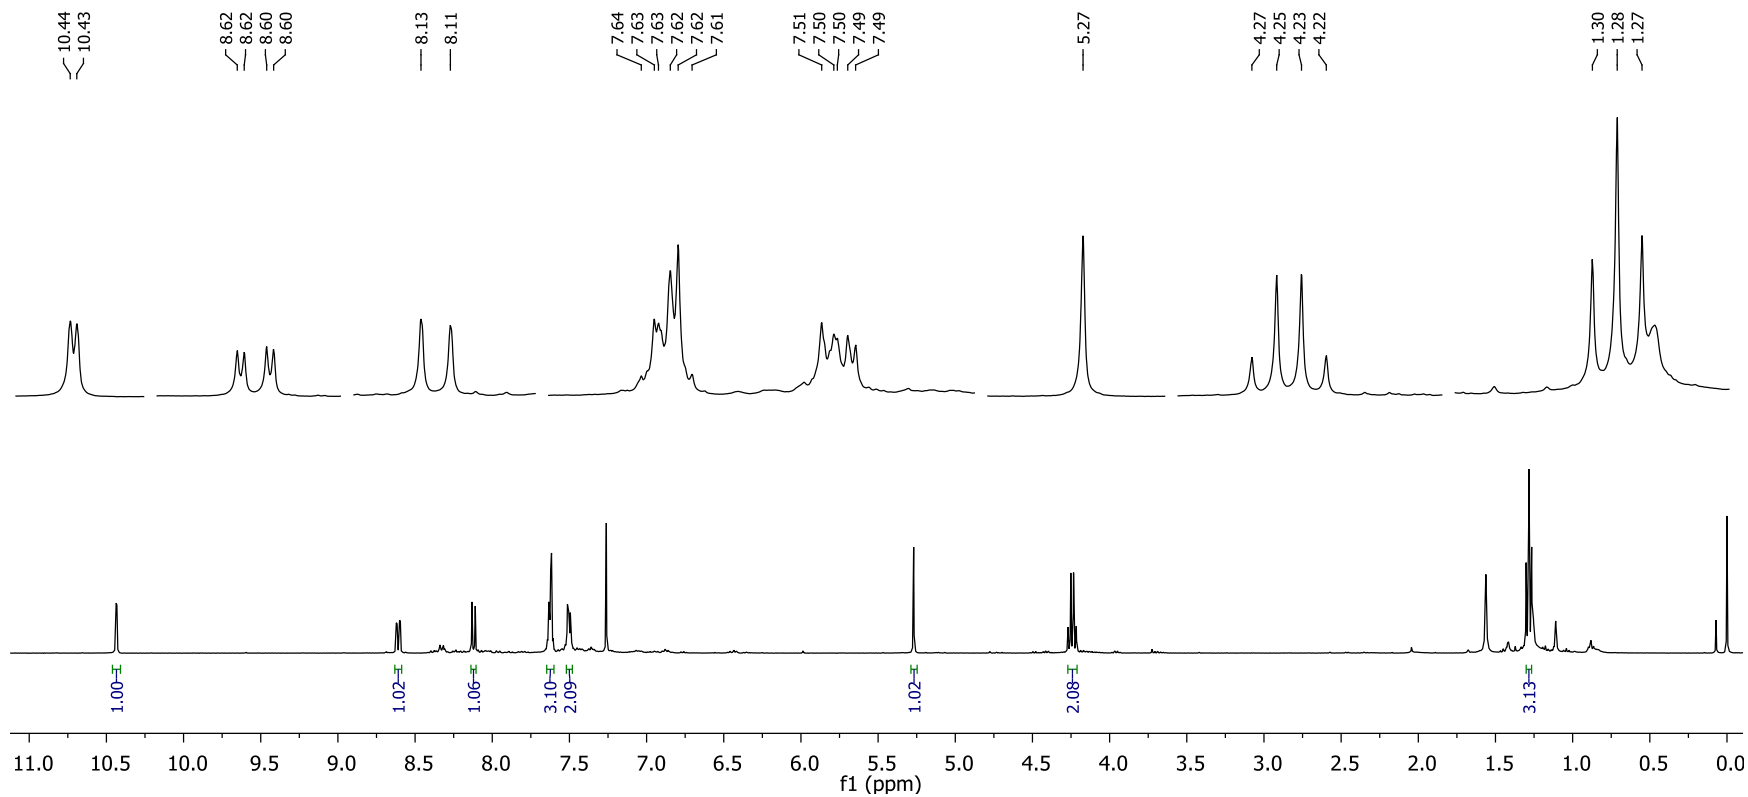

IB379-1F2

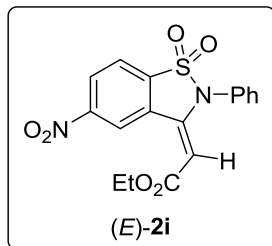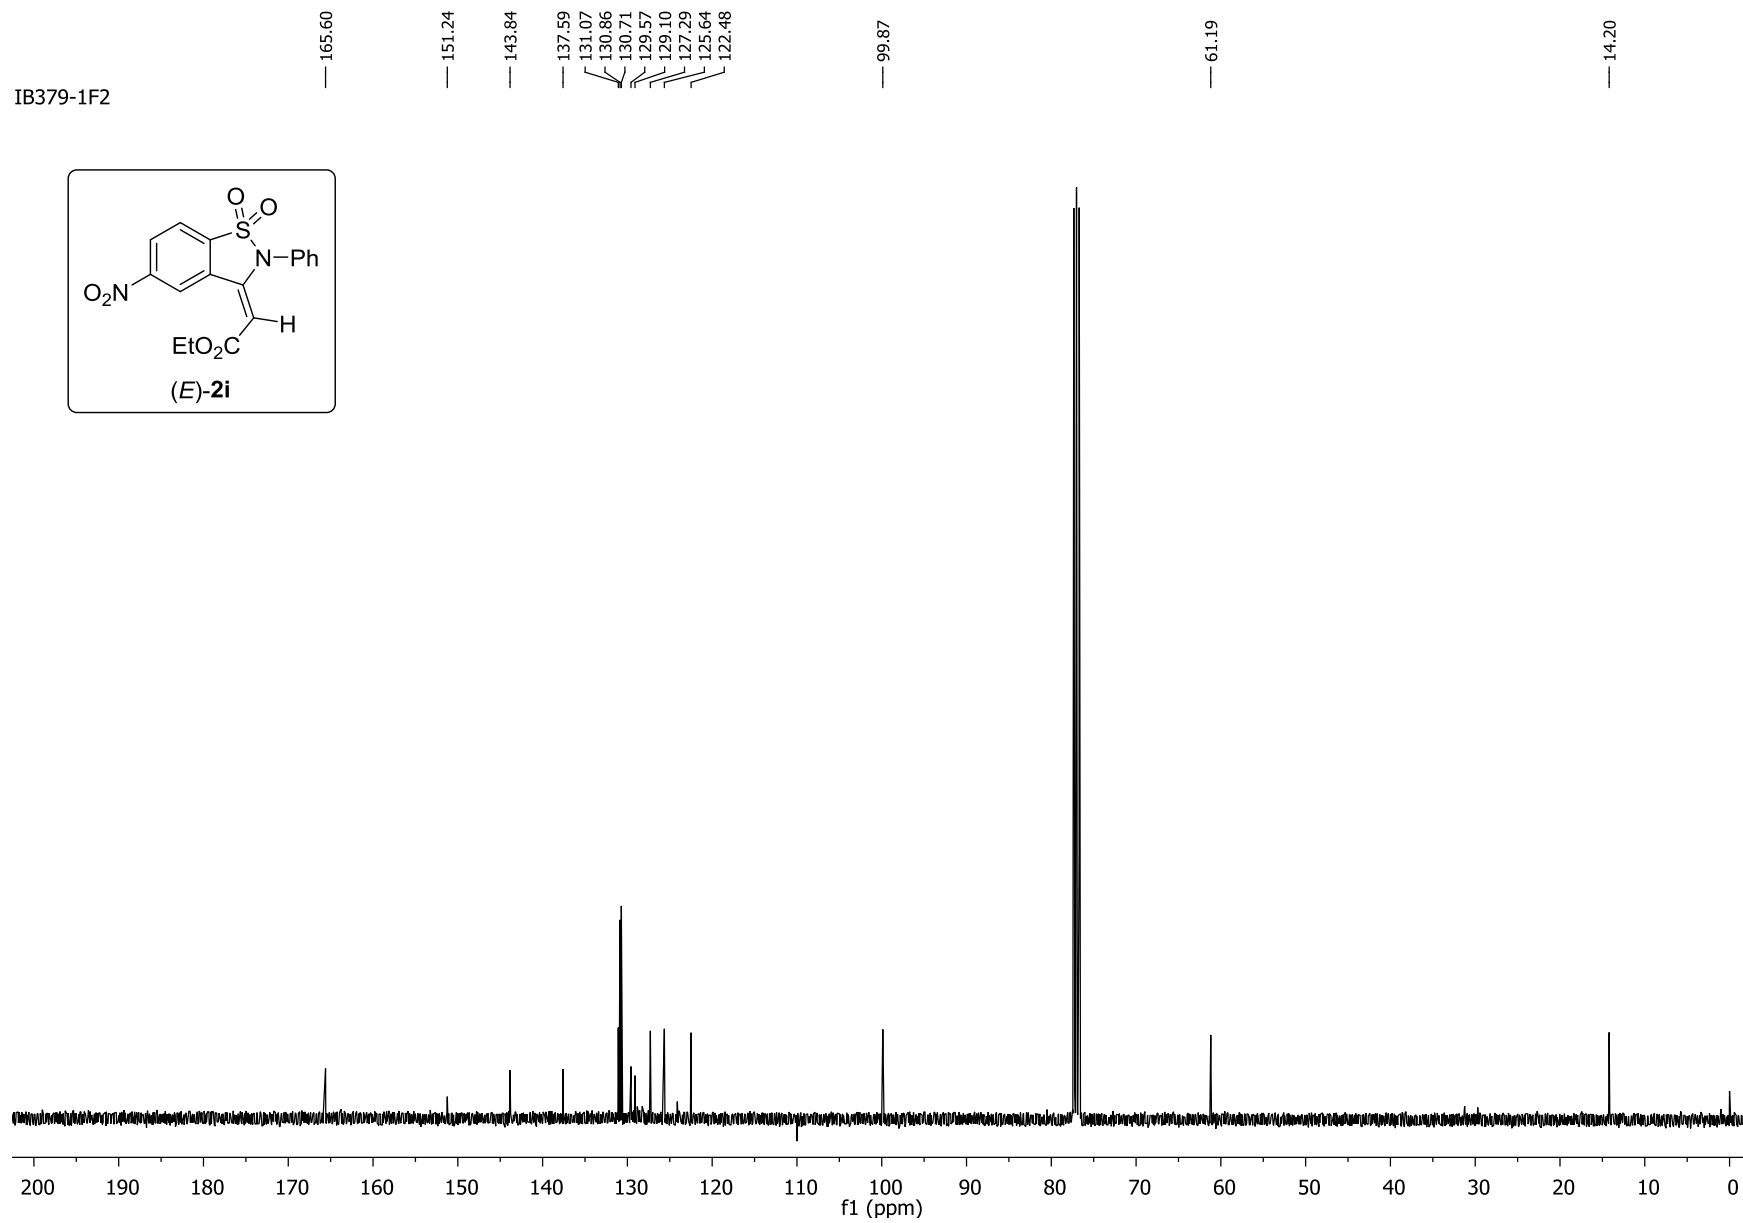

IB367-3

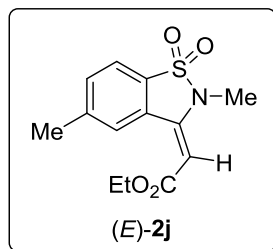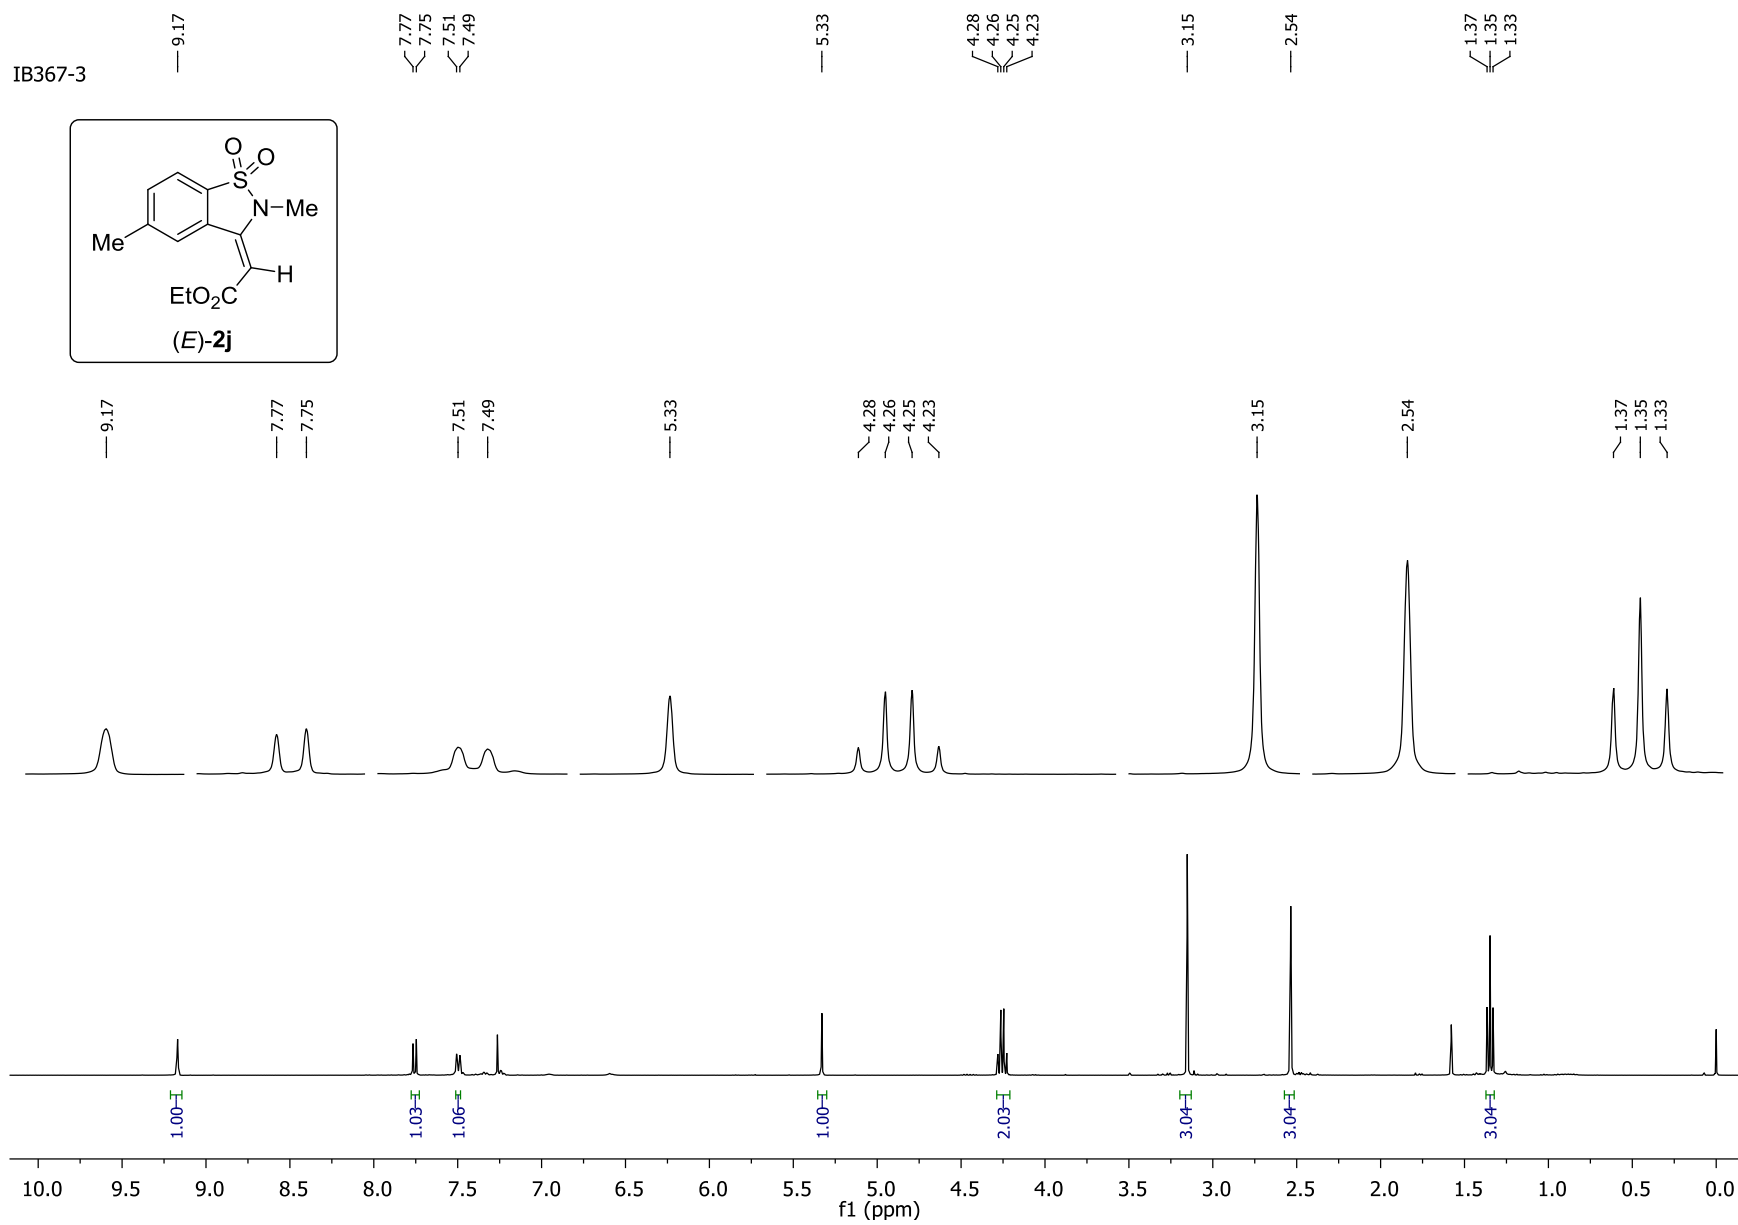

IB367-3

— 165.98

144.93  
144.82

132.74  
130.50  
129.84  
127.86

— 120.75

— 94.99

— 60.54

— 26.46  
— 22.22

— 14.34

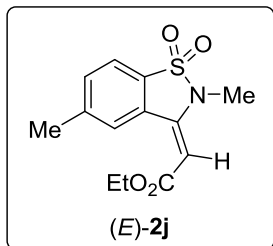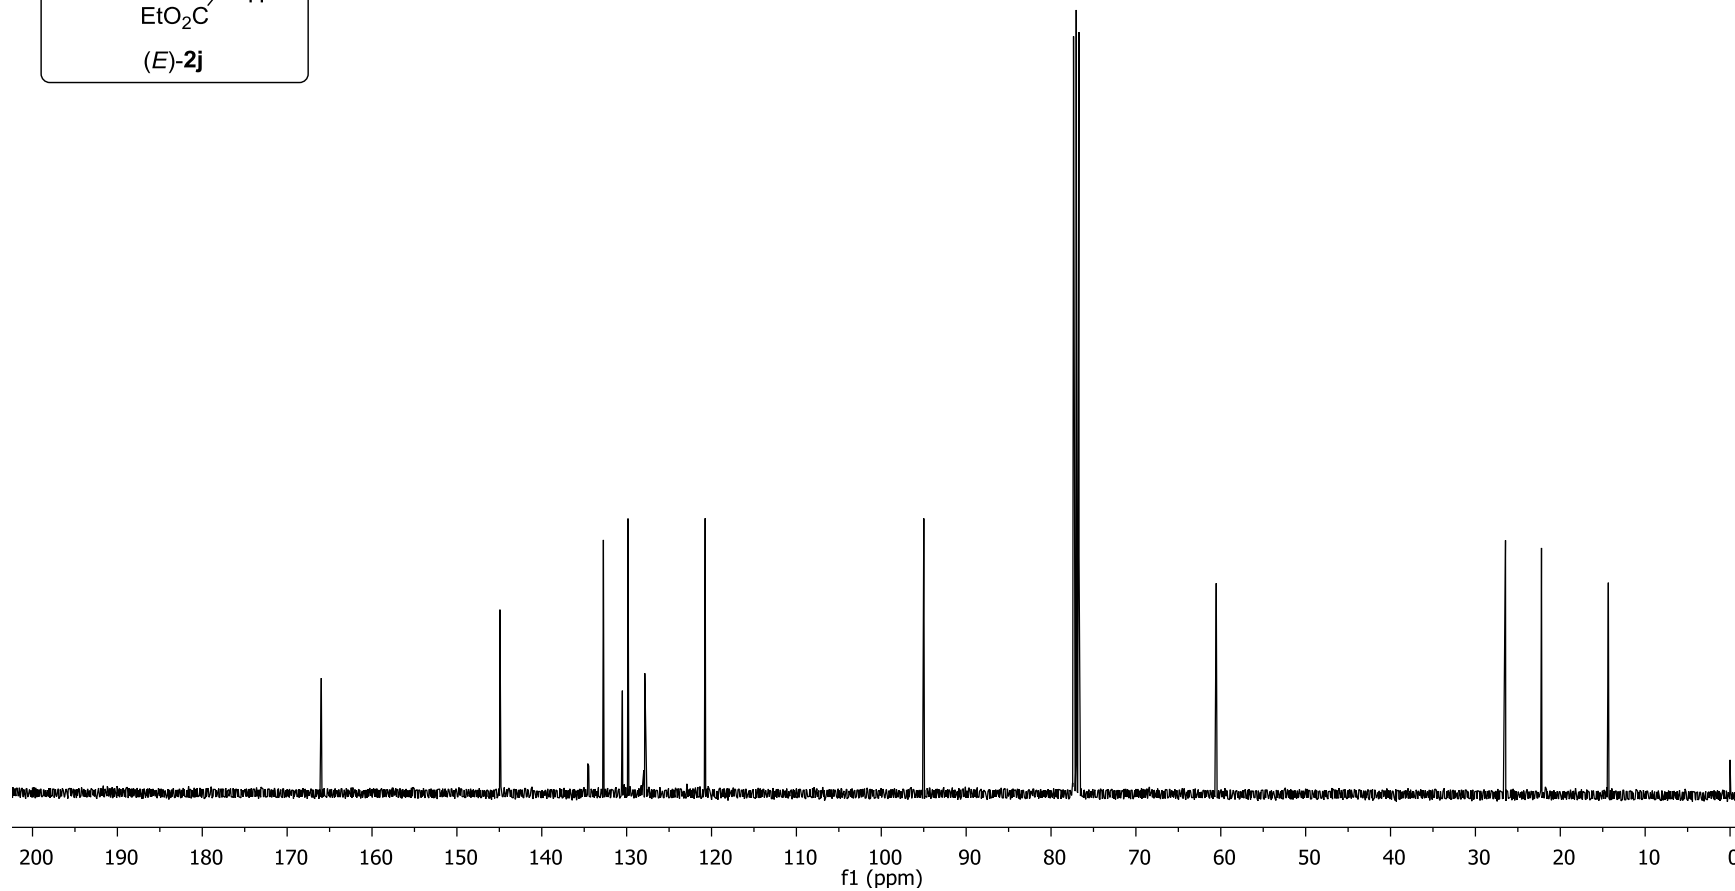

Sel1d IB367-3  
1D Selective Gradient NOESY  
freq: 5.352ppm 1 1

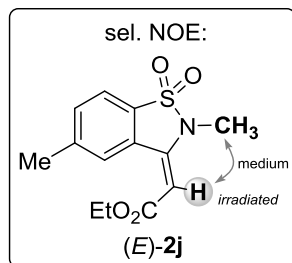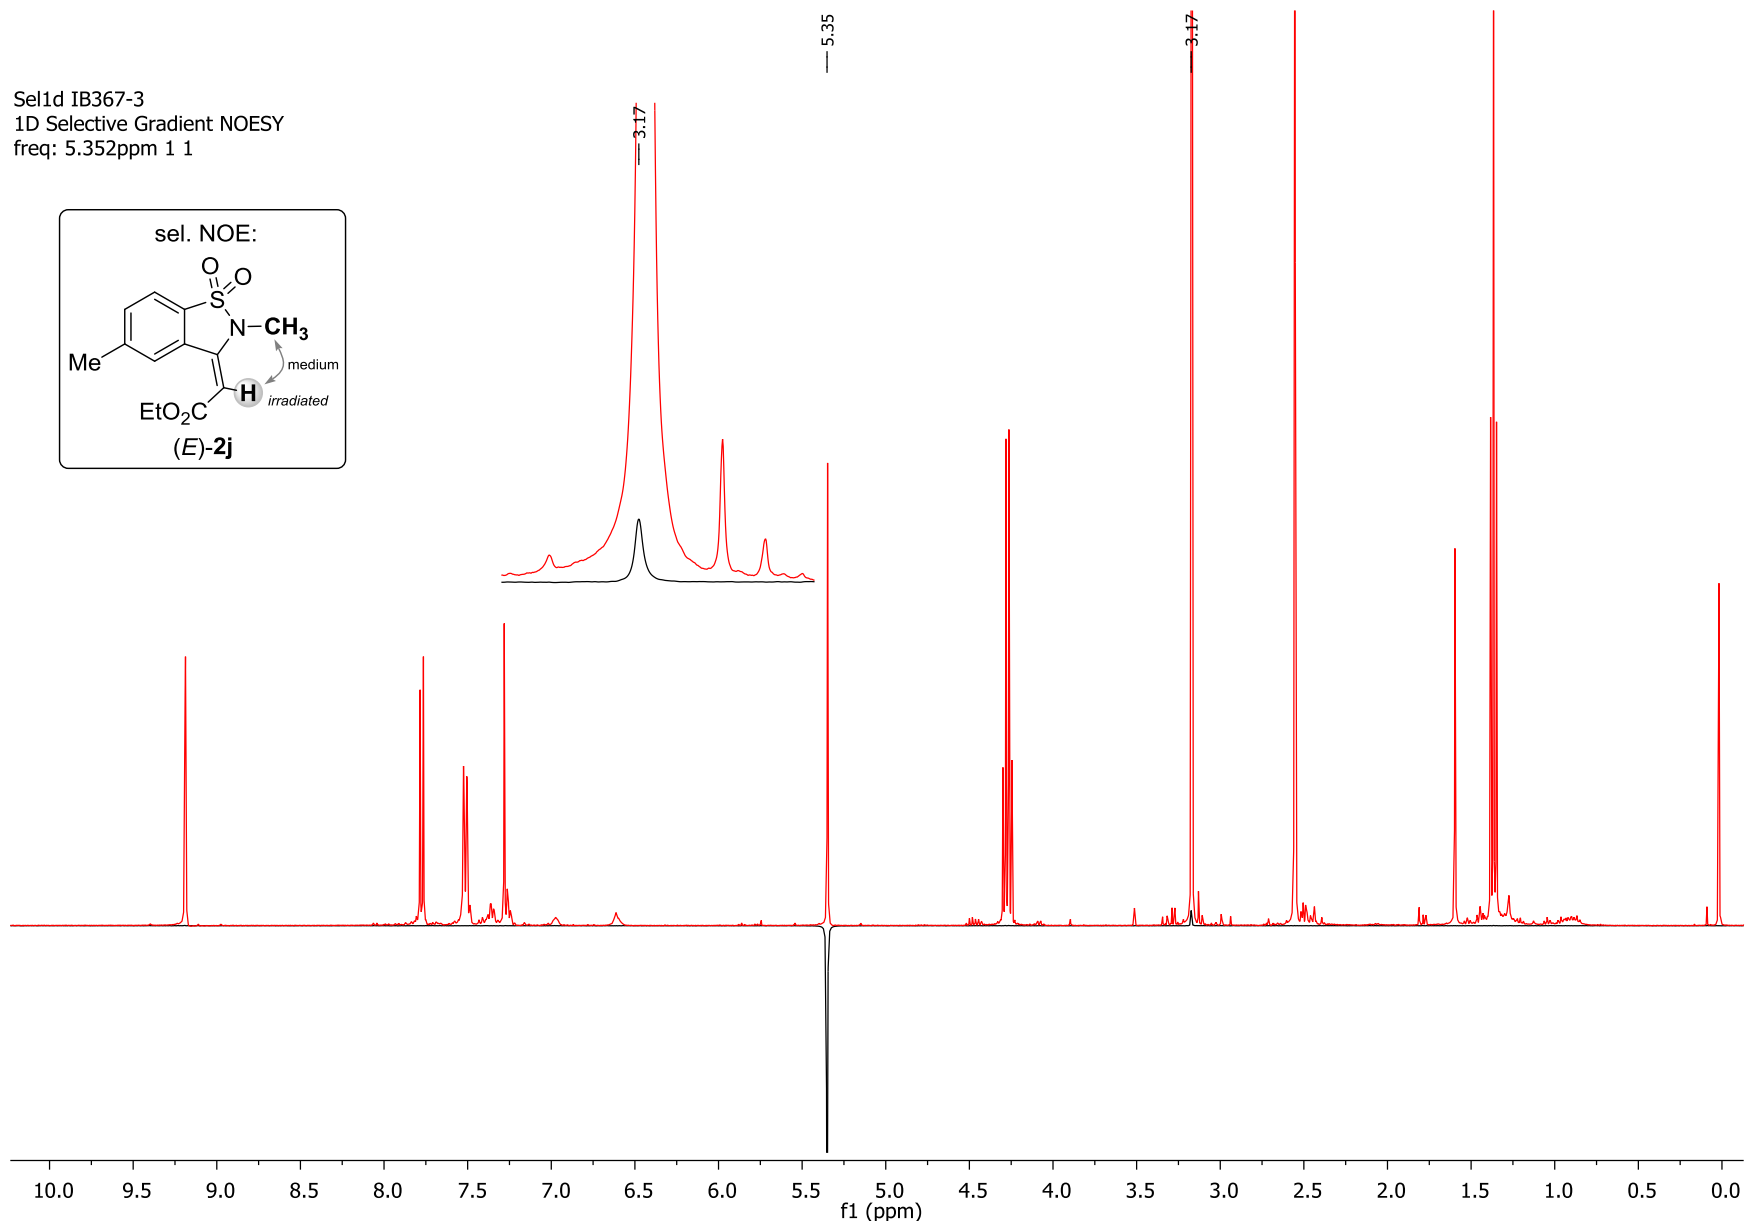



IB362-2F3Full

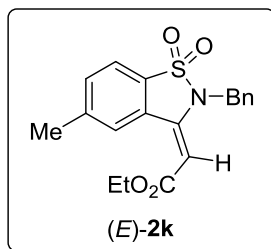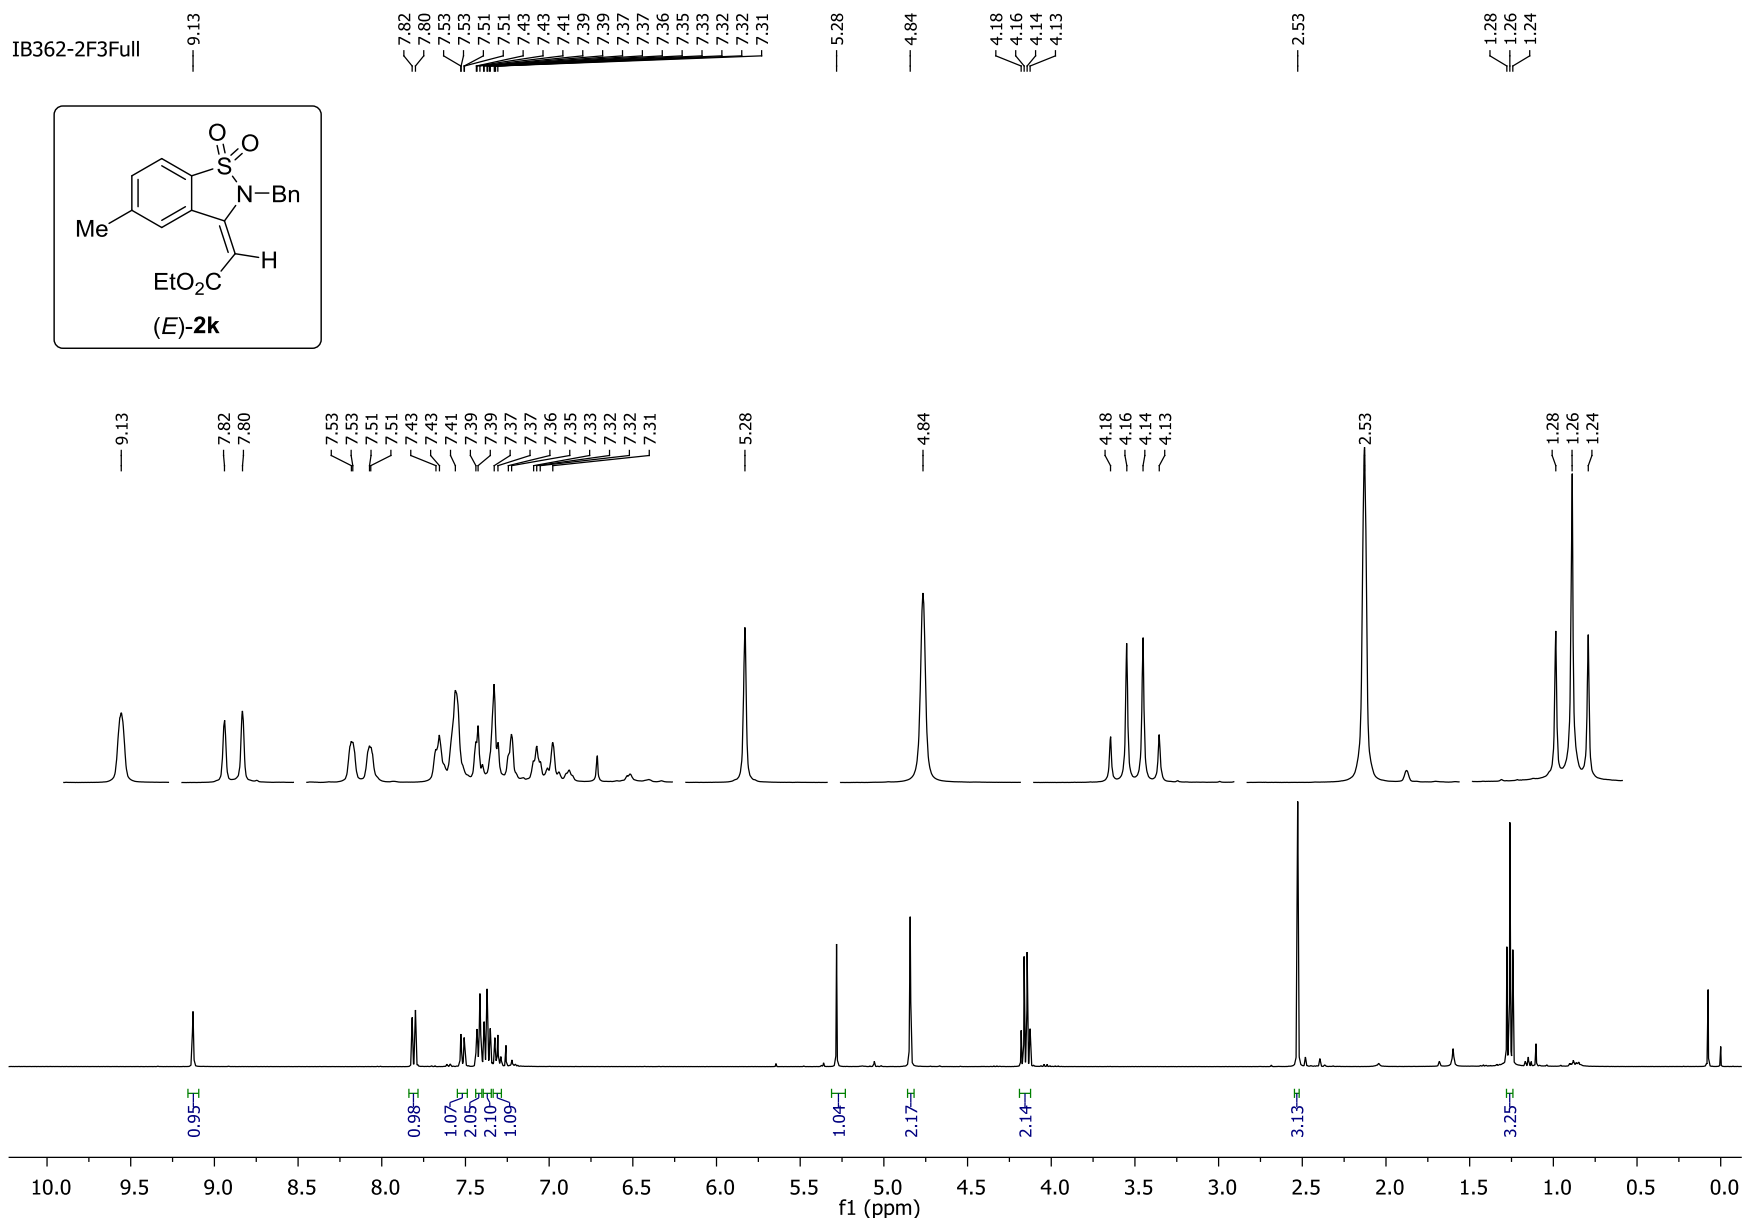

IB362-2F3Full

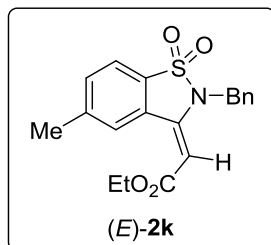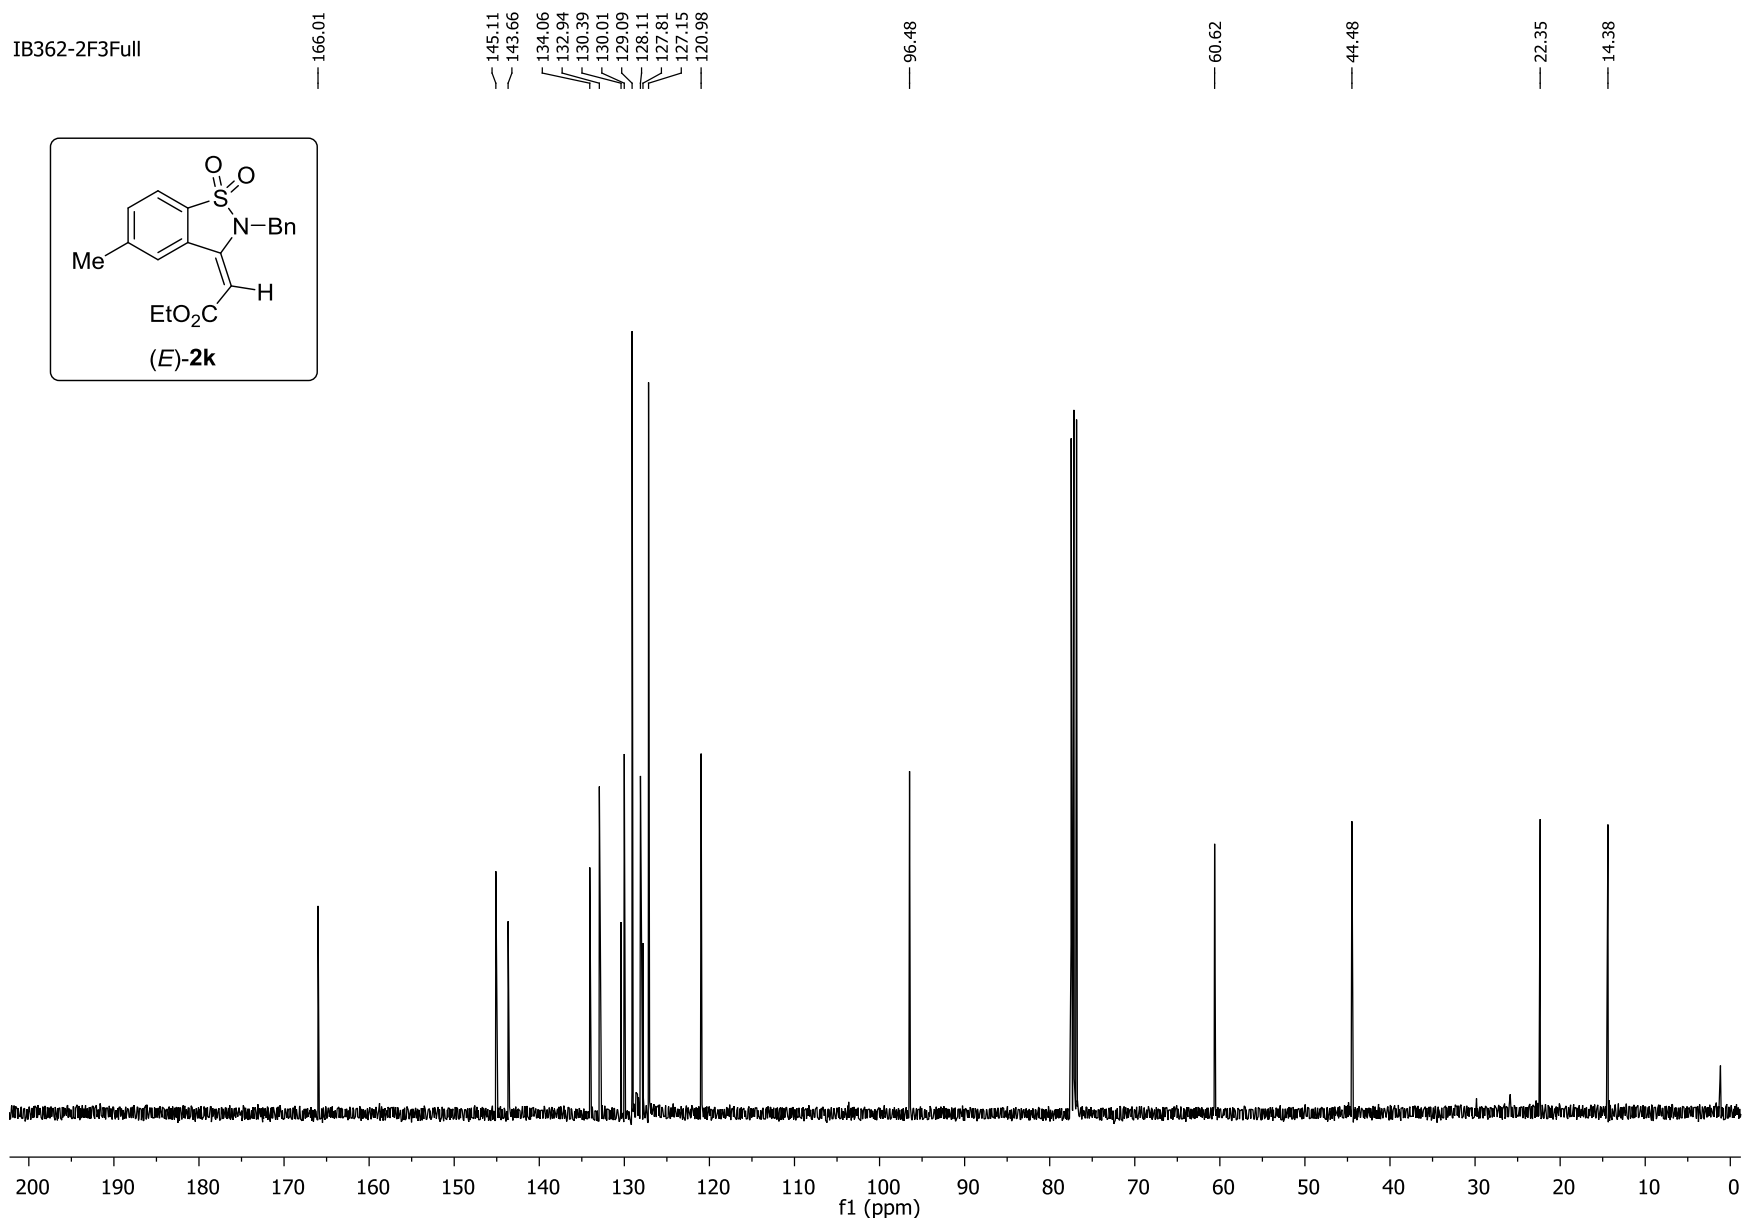

Sel1d IB362-2F3  
1D Selective Gradient NOESY  
freq: 5.310ppm 1 1

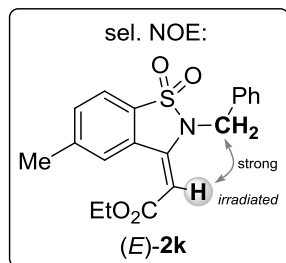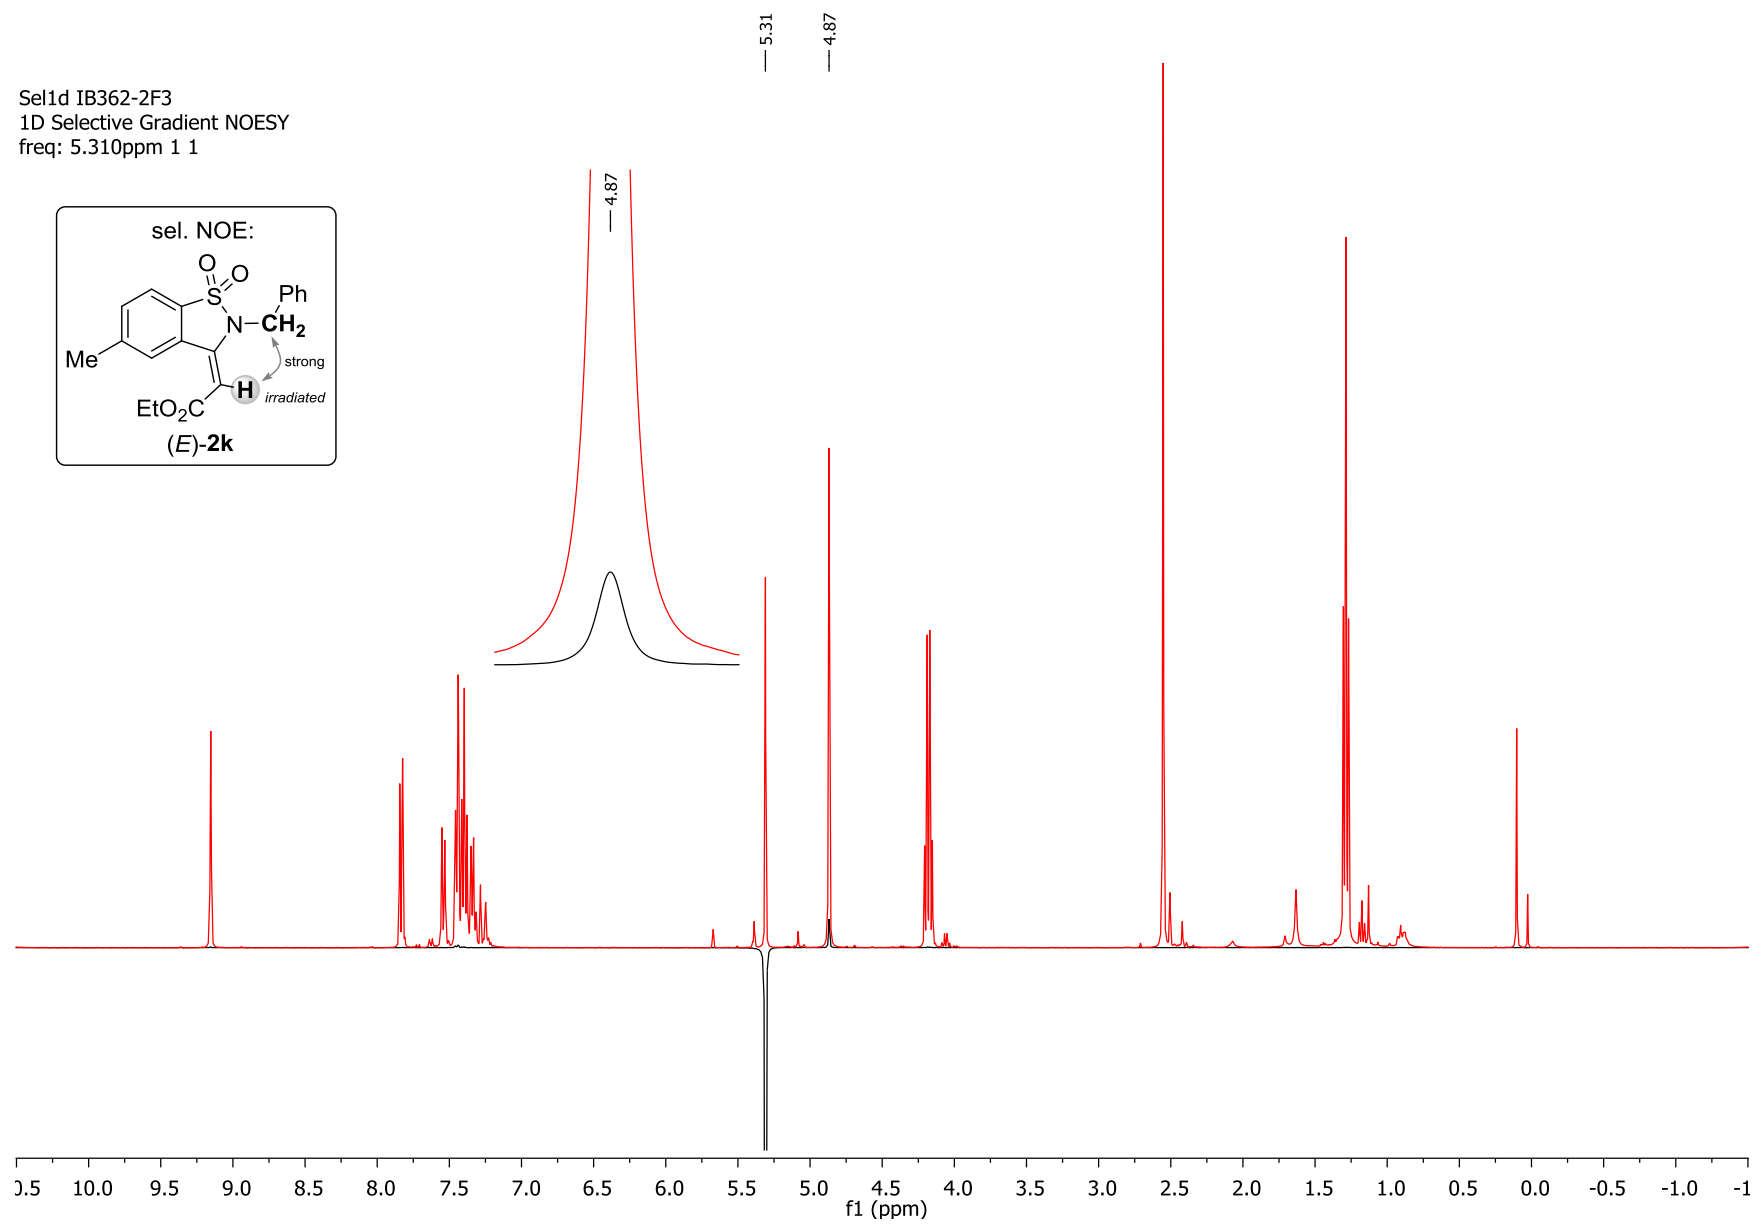

IB362-2F5

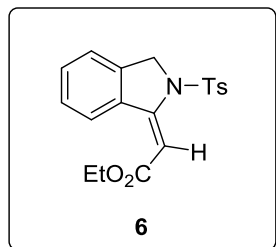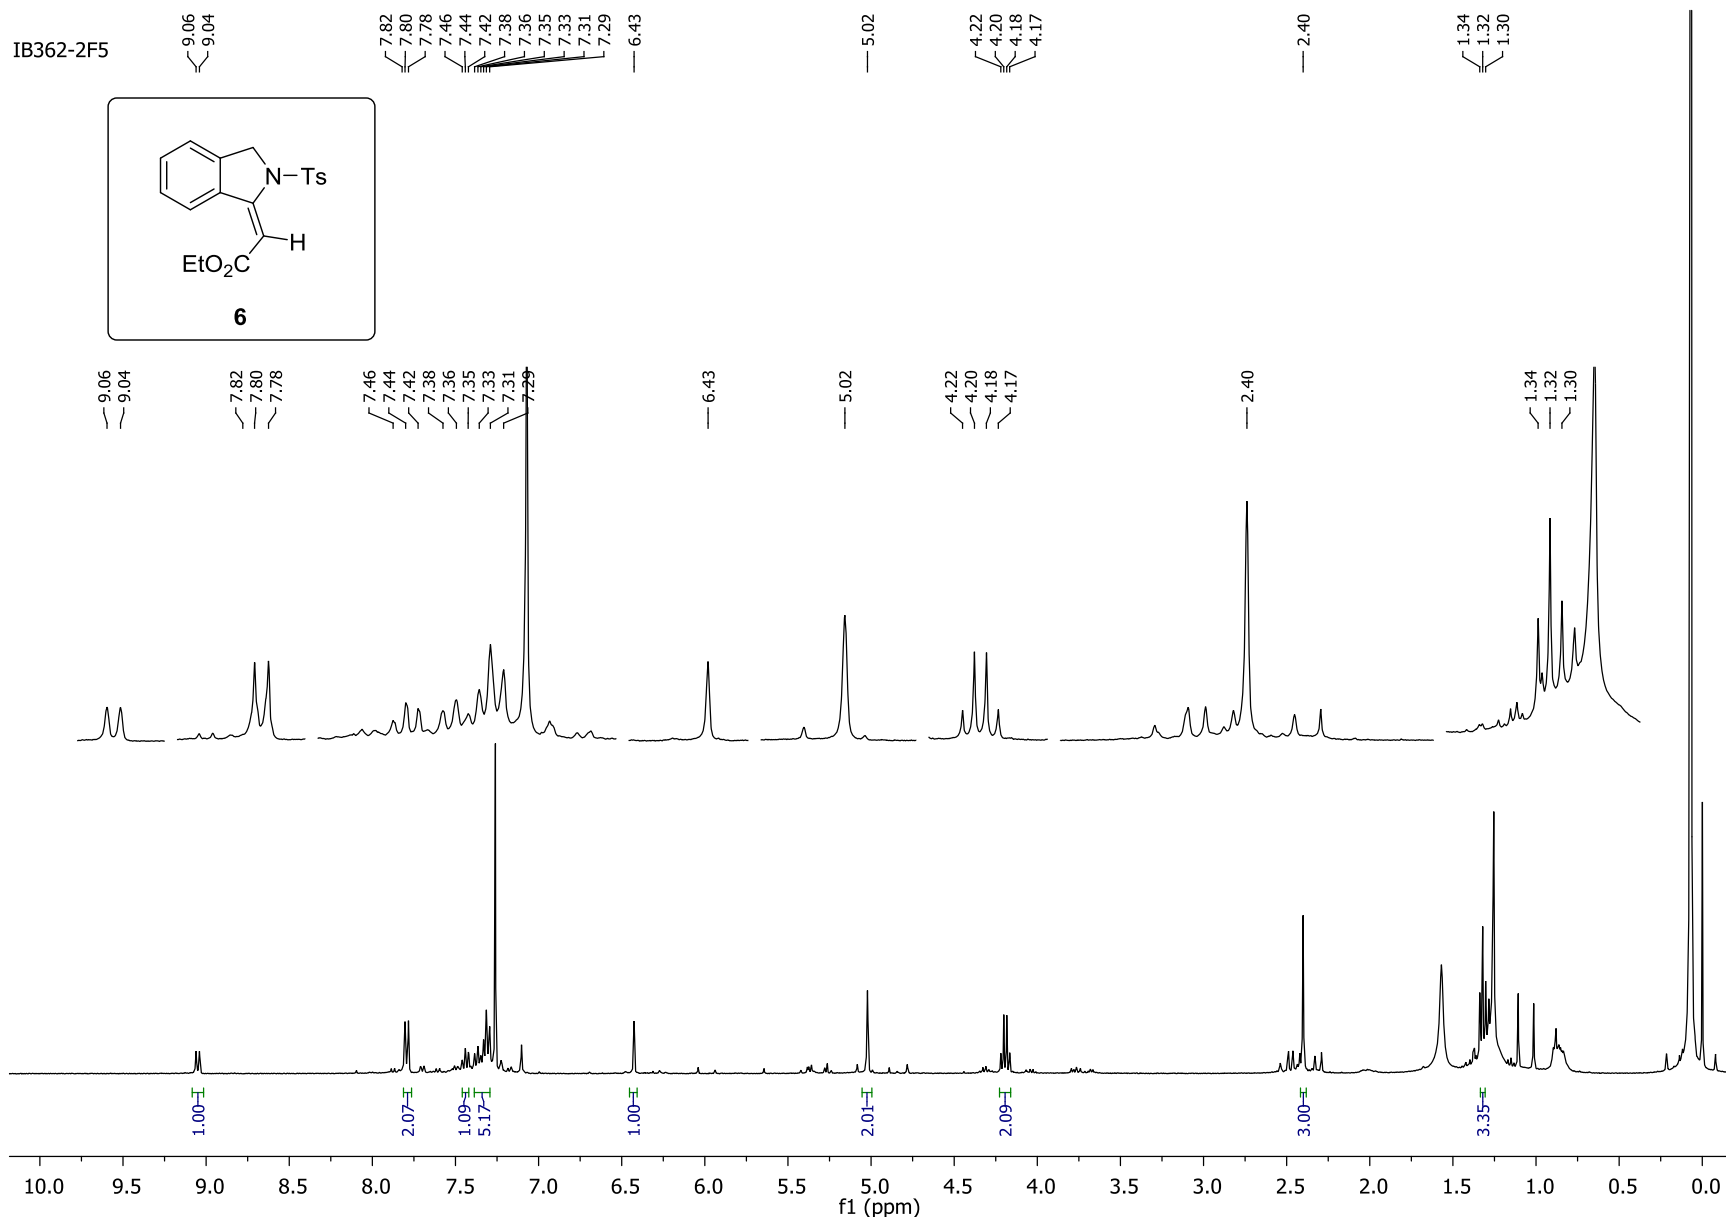

IB362-2F5

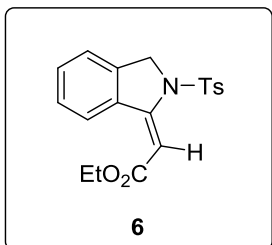

— 166.99  
— 152.01  
— 145.08  
138.11  
134.62  
132.95  
131.32  
130.12  
128.89  
128.40  
127.72  
— 121.94

— 96.72

— 60.10  
— 55.37

— 21.75  
— 14.56

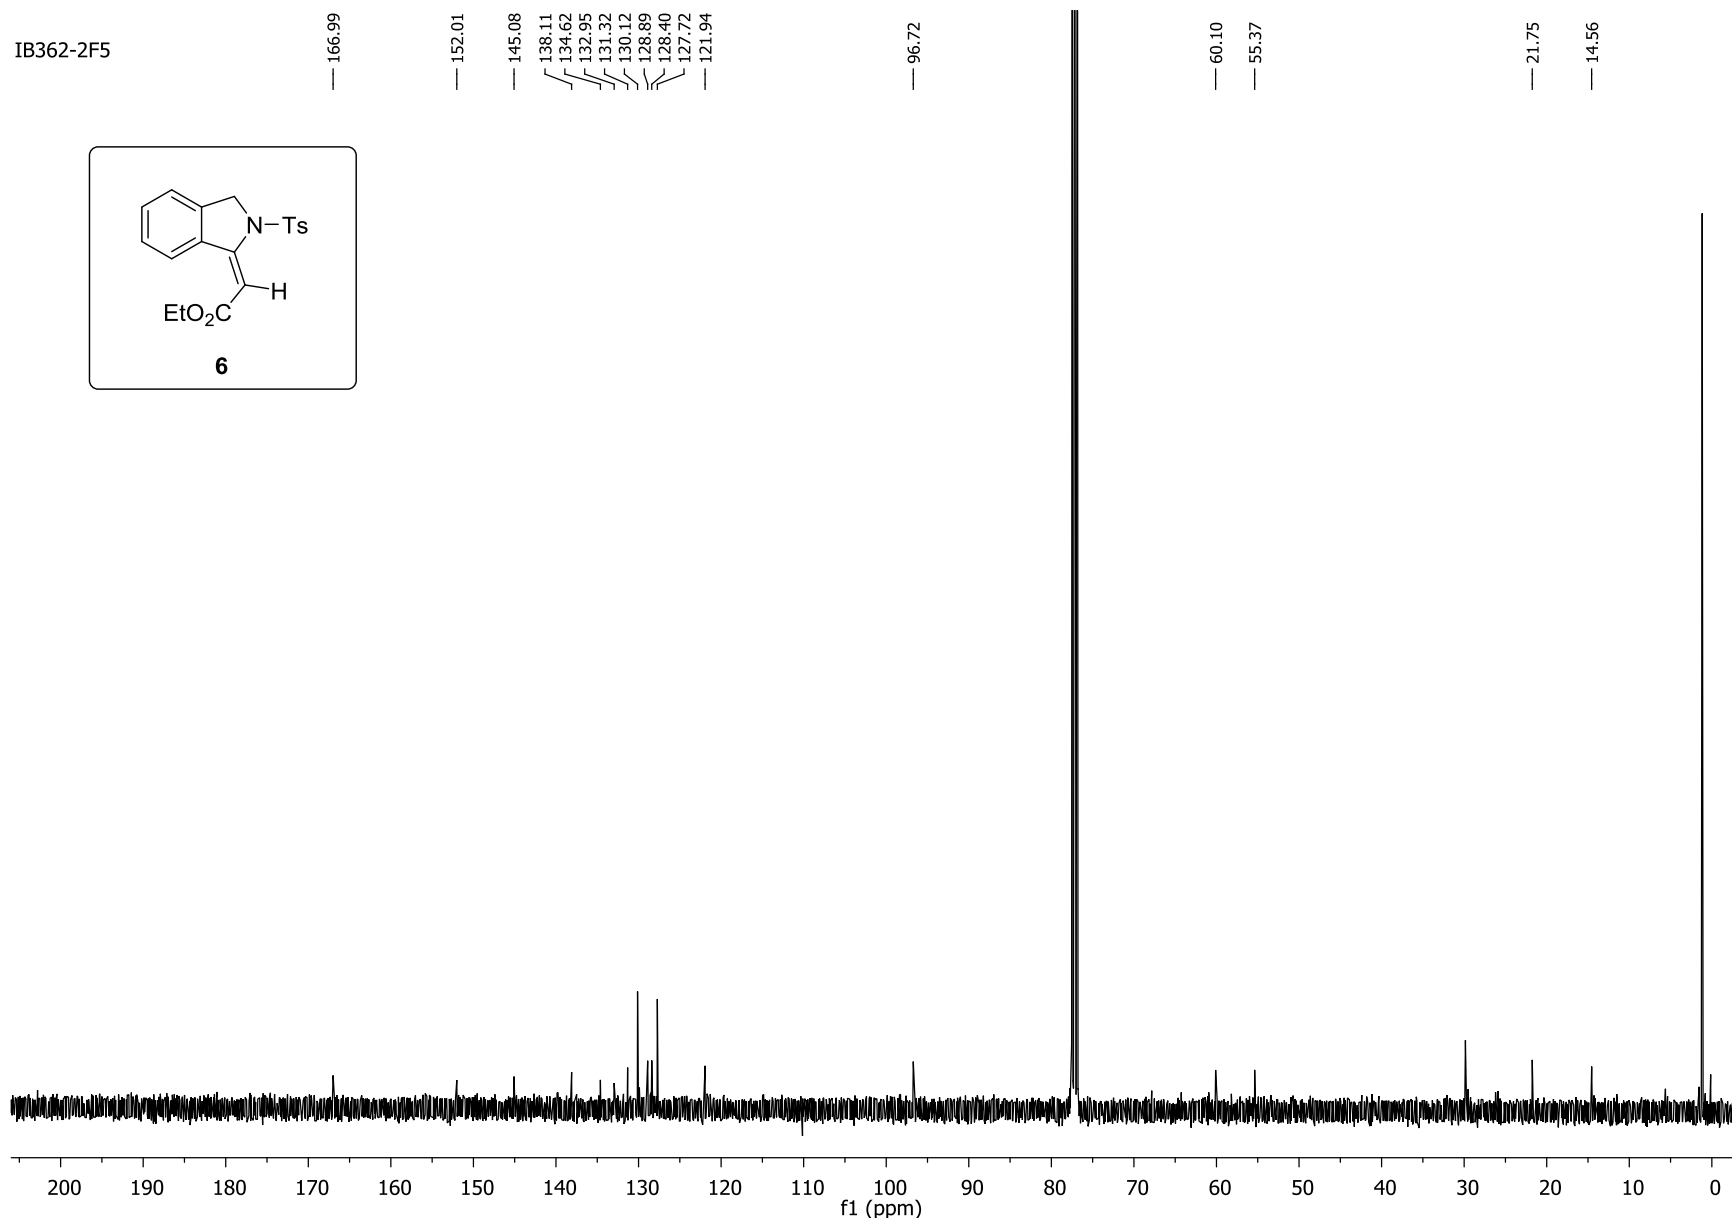

# Photochemical Rearrangement of 1,2-Benzothiazole-1,1-diones. Products 12a-d

IB337-2F2Full 10.43

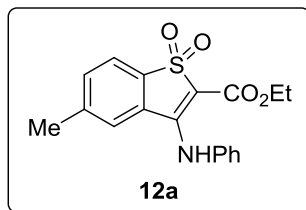

7.72  
7.70  
7.50  
7.49  
7.49  
7.48  
7.48  
7.47  
7.47  
7.46  
7.40  
7.40  
7.38  
7.38  
7.33  
7.33  
7.32  
7.31  
7.31  
6.40  
6.40

4.46  
4.44  
4.42  
4.40

2.12

1.47  
1.45  
1.43

10.43

7.72  
7.70

7.50  
7.49  
7.49  
7.48  
7.48  
7.47  
7.47  
7.46

7.40  
7.40  
7.38  
7.33  
7.33  
7.32  
7.31  
7.31

6.40  
6.40  
6.40

4.46  
4.44  
4.42  
4.40

2.12

1.47  
1.45  
1.43

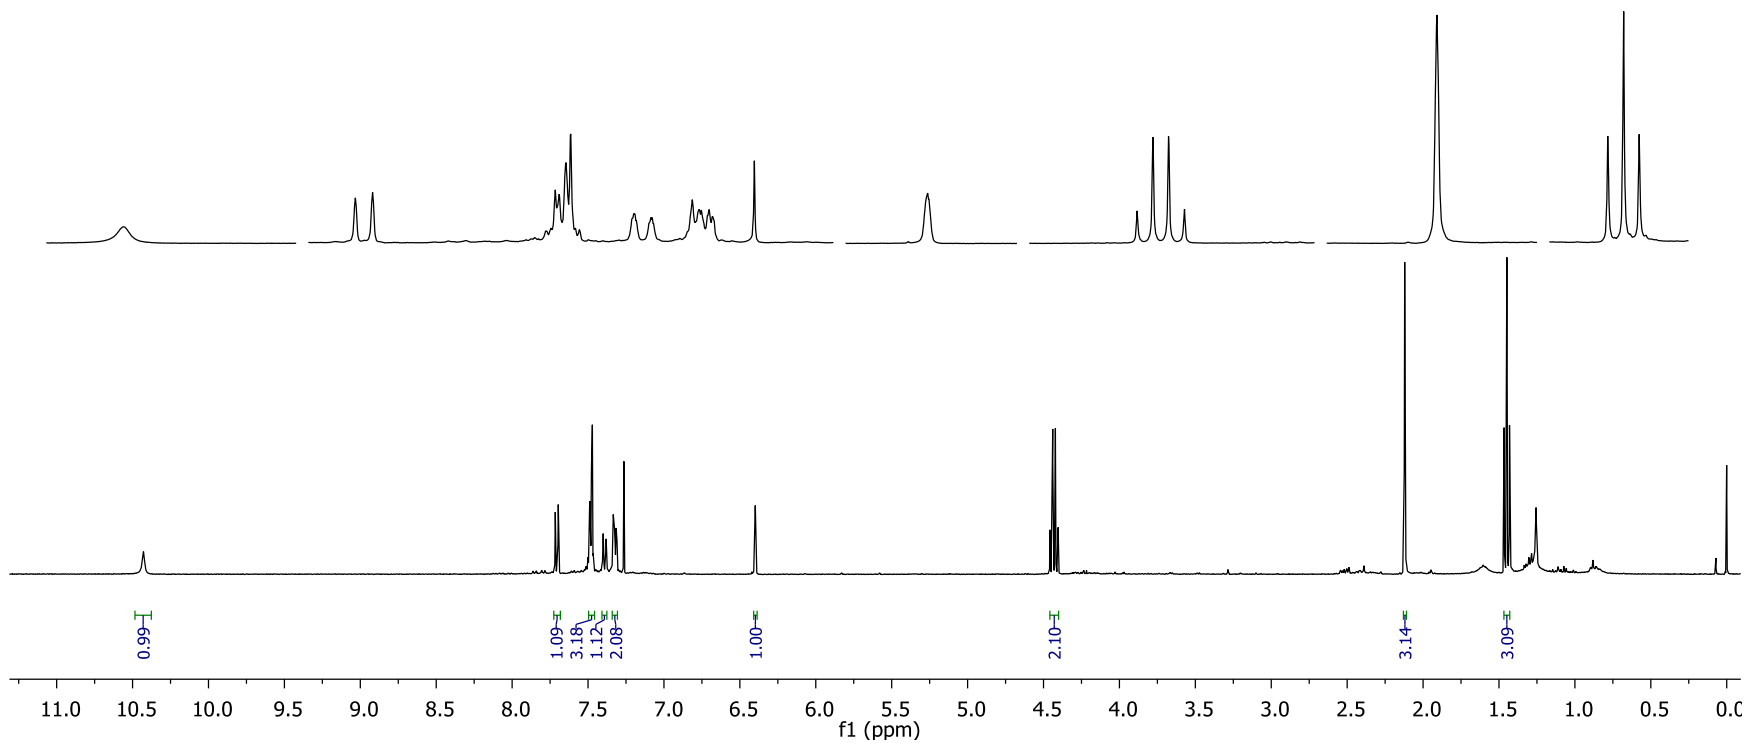

IB337-2F2Full

— 164.52

— 154.94

— 142.77

— 138.22

— 137.44

— 133.62

— 129.79

— 128.59

— 126.95

— 126.52

— 125.86

— 121.24

— 100.05

— 61.14

— 21.73

— 14.37

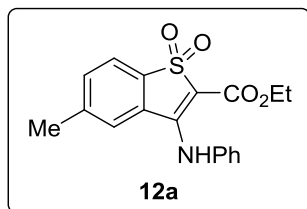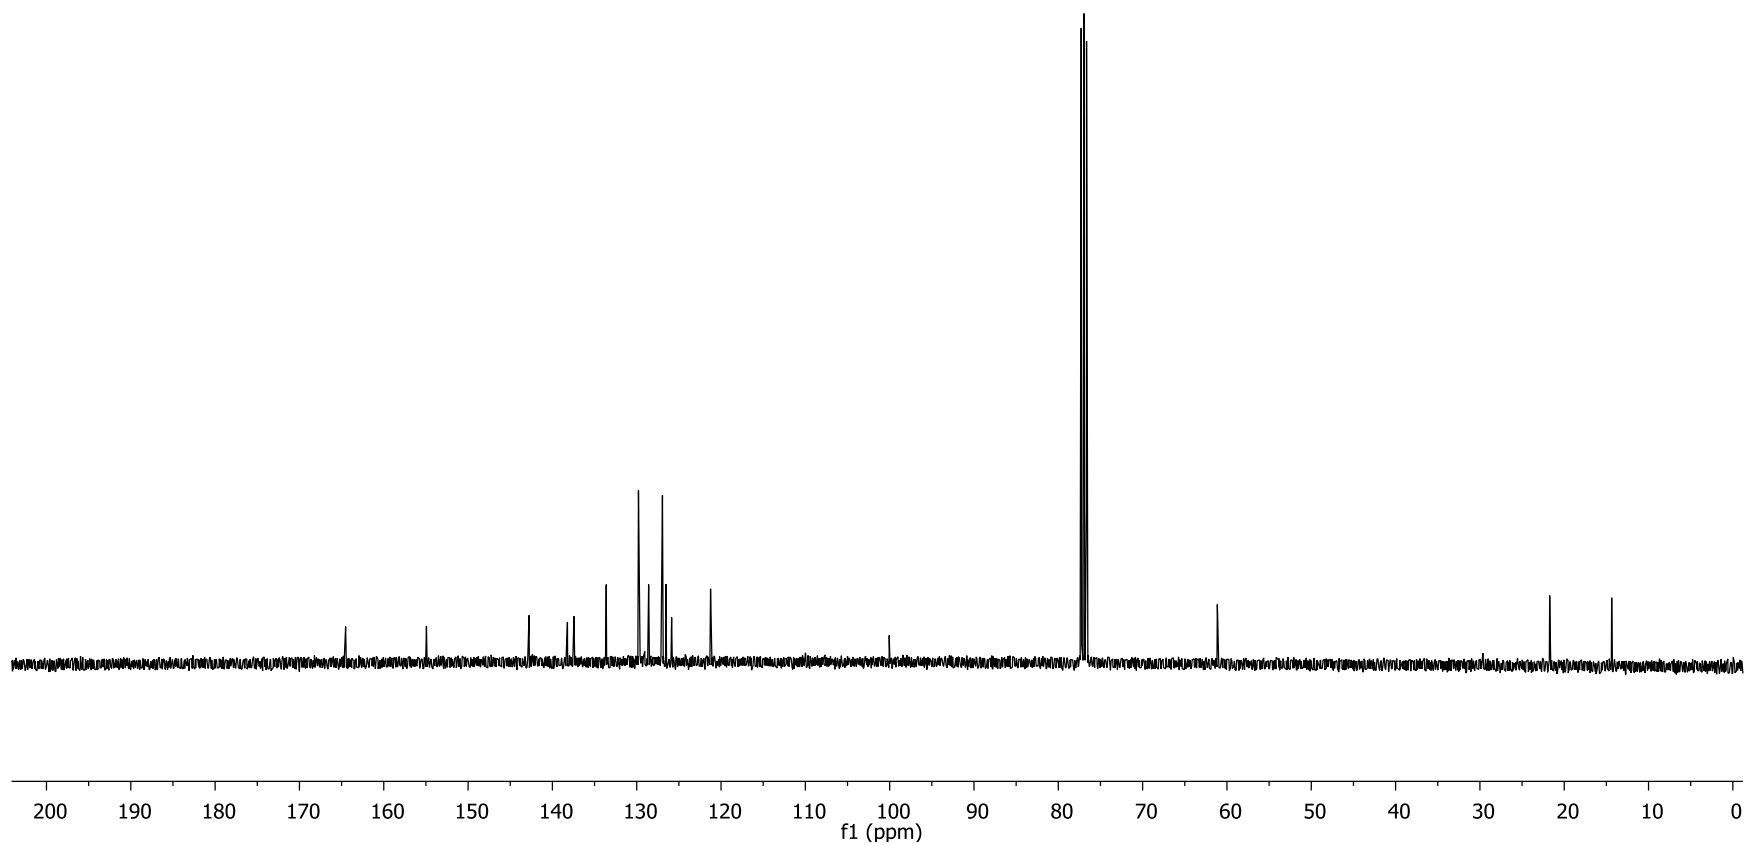

Sel1d IB337-2F2  
1D Selective Gradient NOESY  
freq: 6.416ppm 1 1

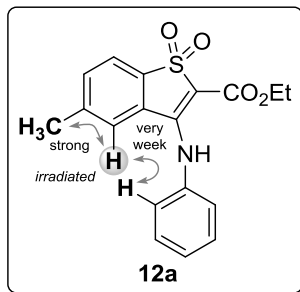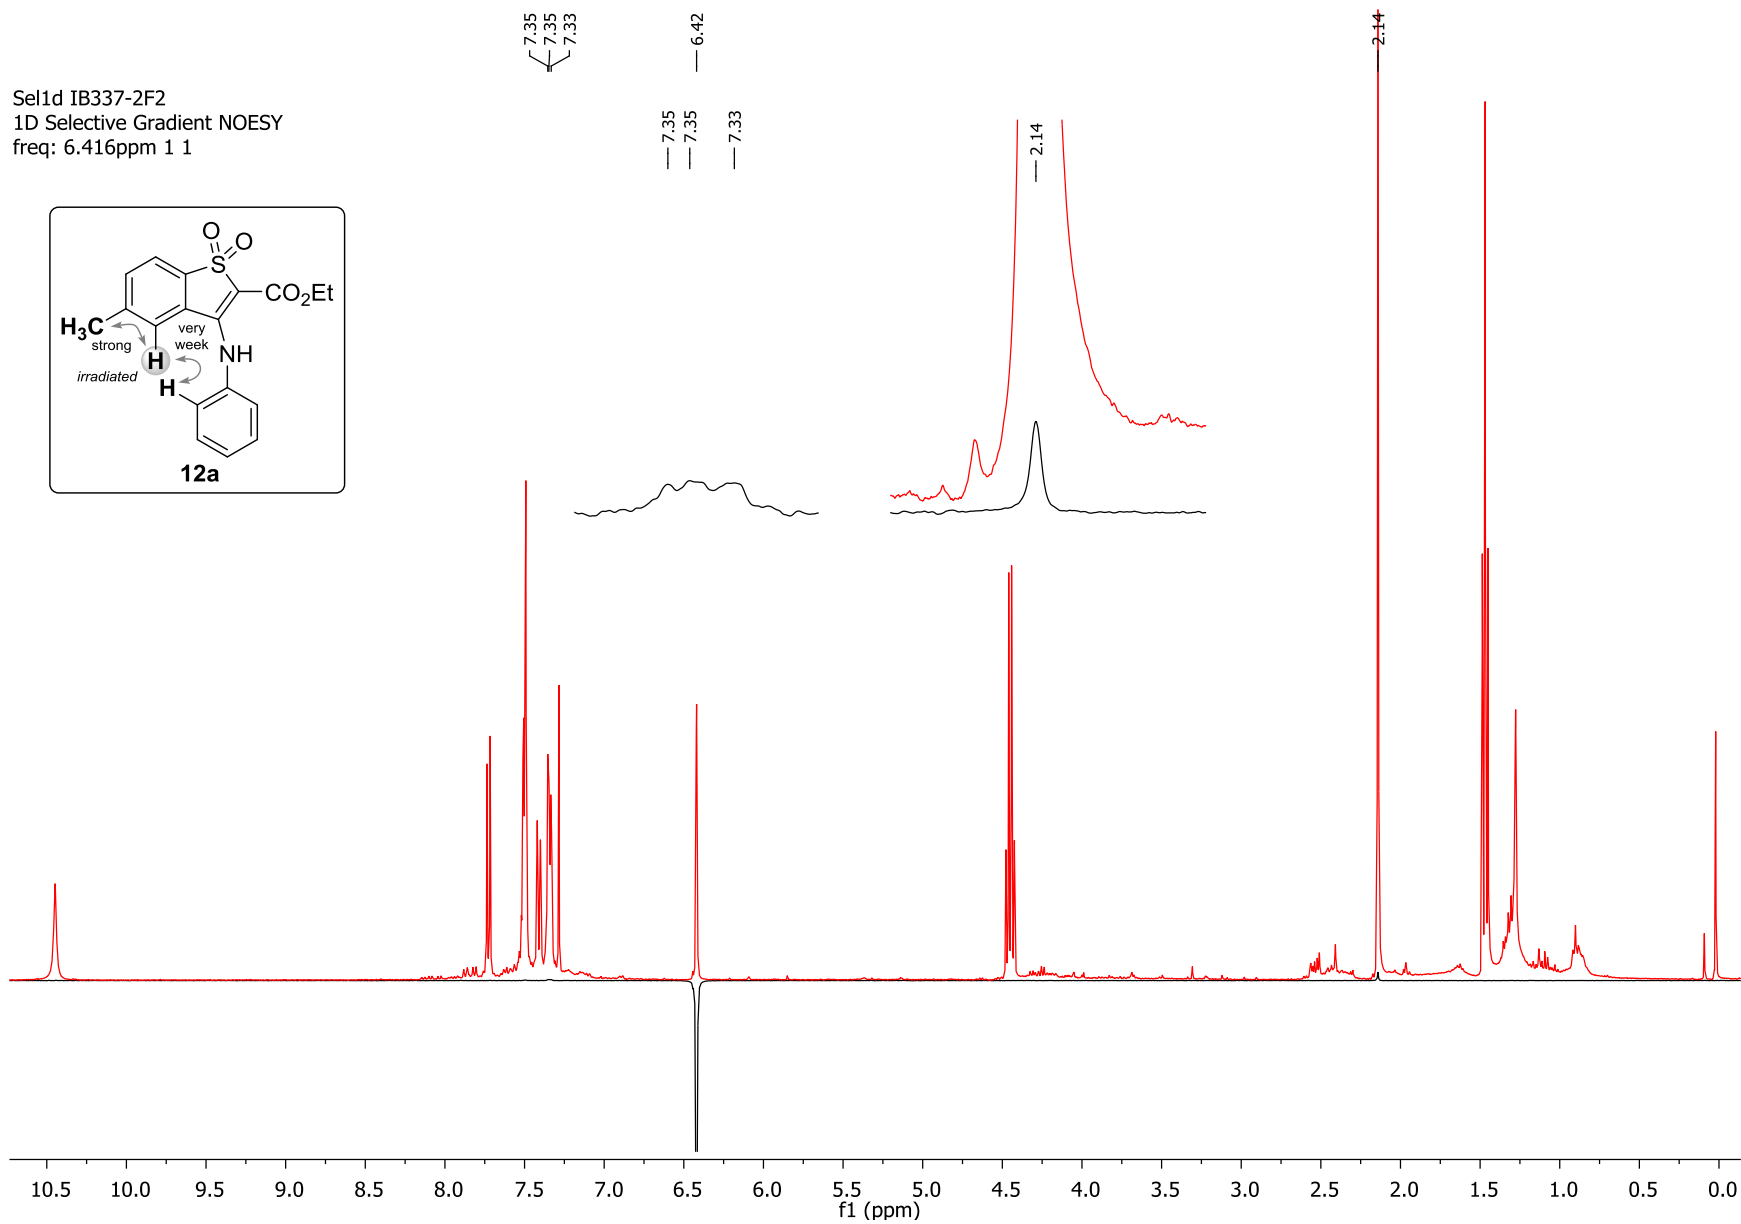



IB381-1F1

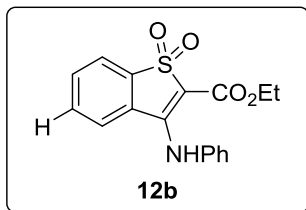

10.44  
7.84  
7.82  
7.62  
7.62  
7.60  
7.60  
7.58  
7.58  
7.52  
7.51  
7.49  
7.48  
7.47  
7.47  
7.34  
7.33  
7.32  
7.28  
7.27  
7.26  
7.26  
7.25  
7.24  
7.23  
6.67  
6.65

4.47  
4.45  
4.43  
4.41

1.47  
1.45  
1.44

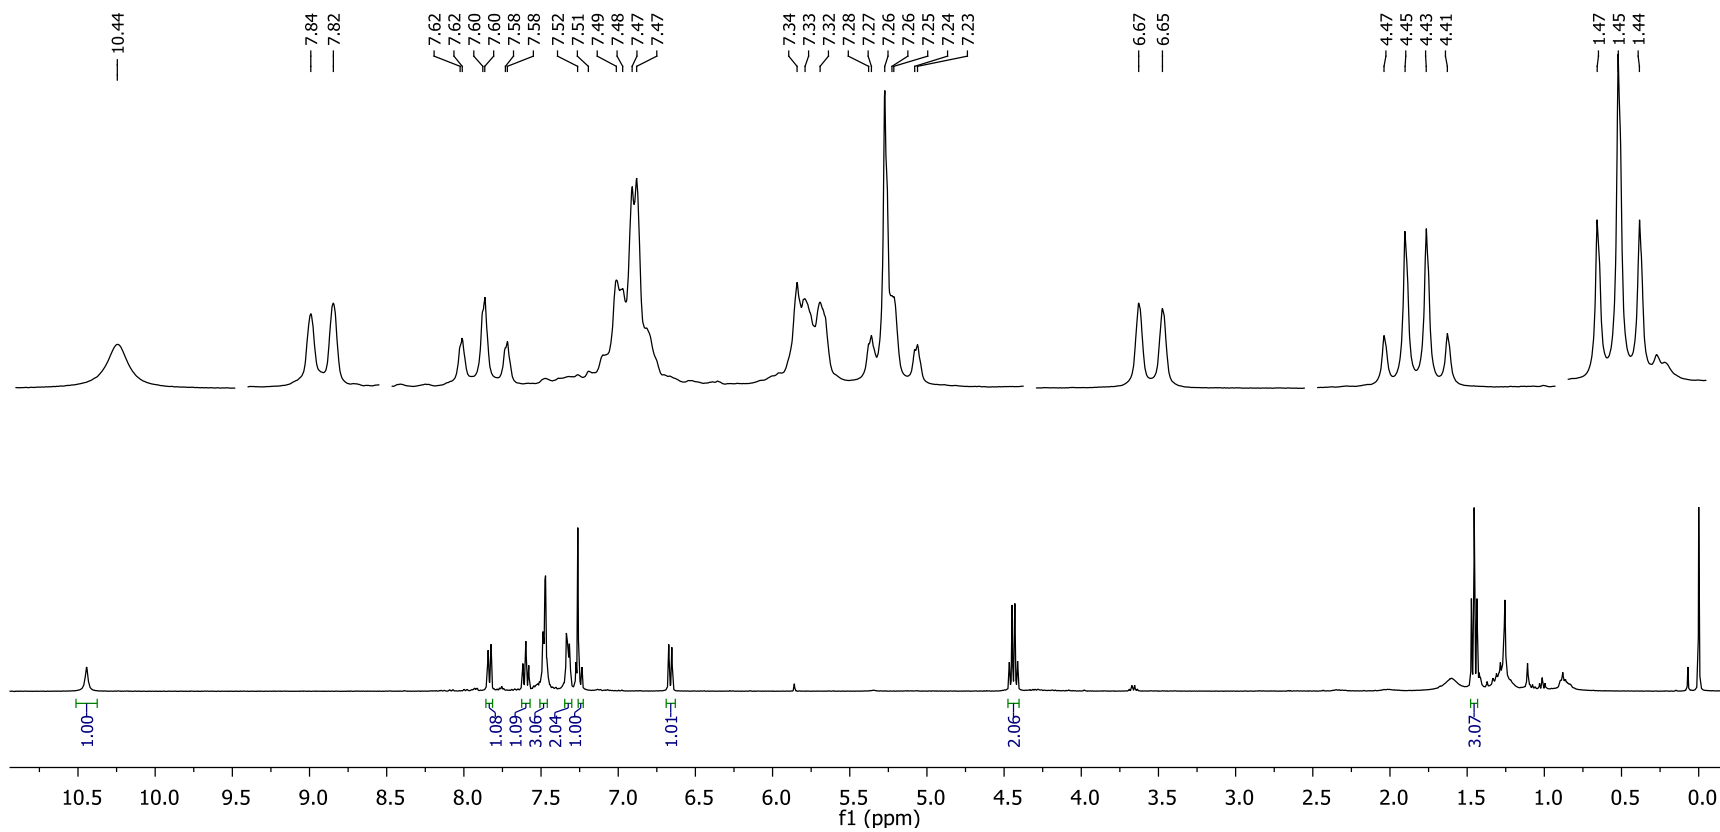

IB381-1F1

— 164.55

— 154.82

— 141.01  
— 137.41  
— 133.23  
— 132.11  
— 129.99  
— 128.72  
— 126.93  
— 125.87  
— 125.72  
— 121.55

— 99.89

— 61.27

— 14.42

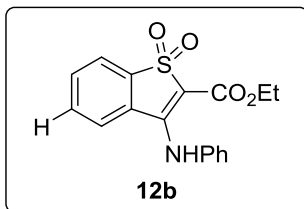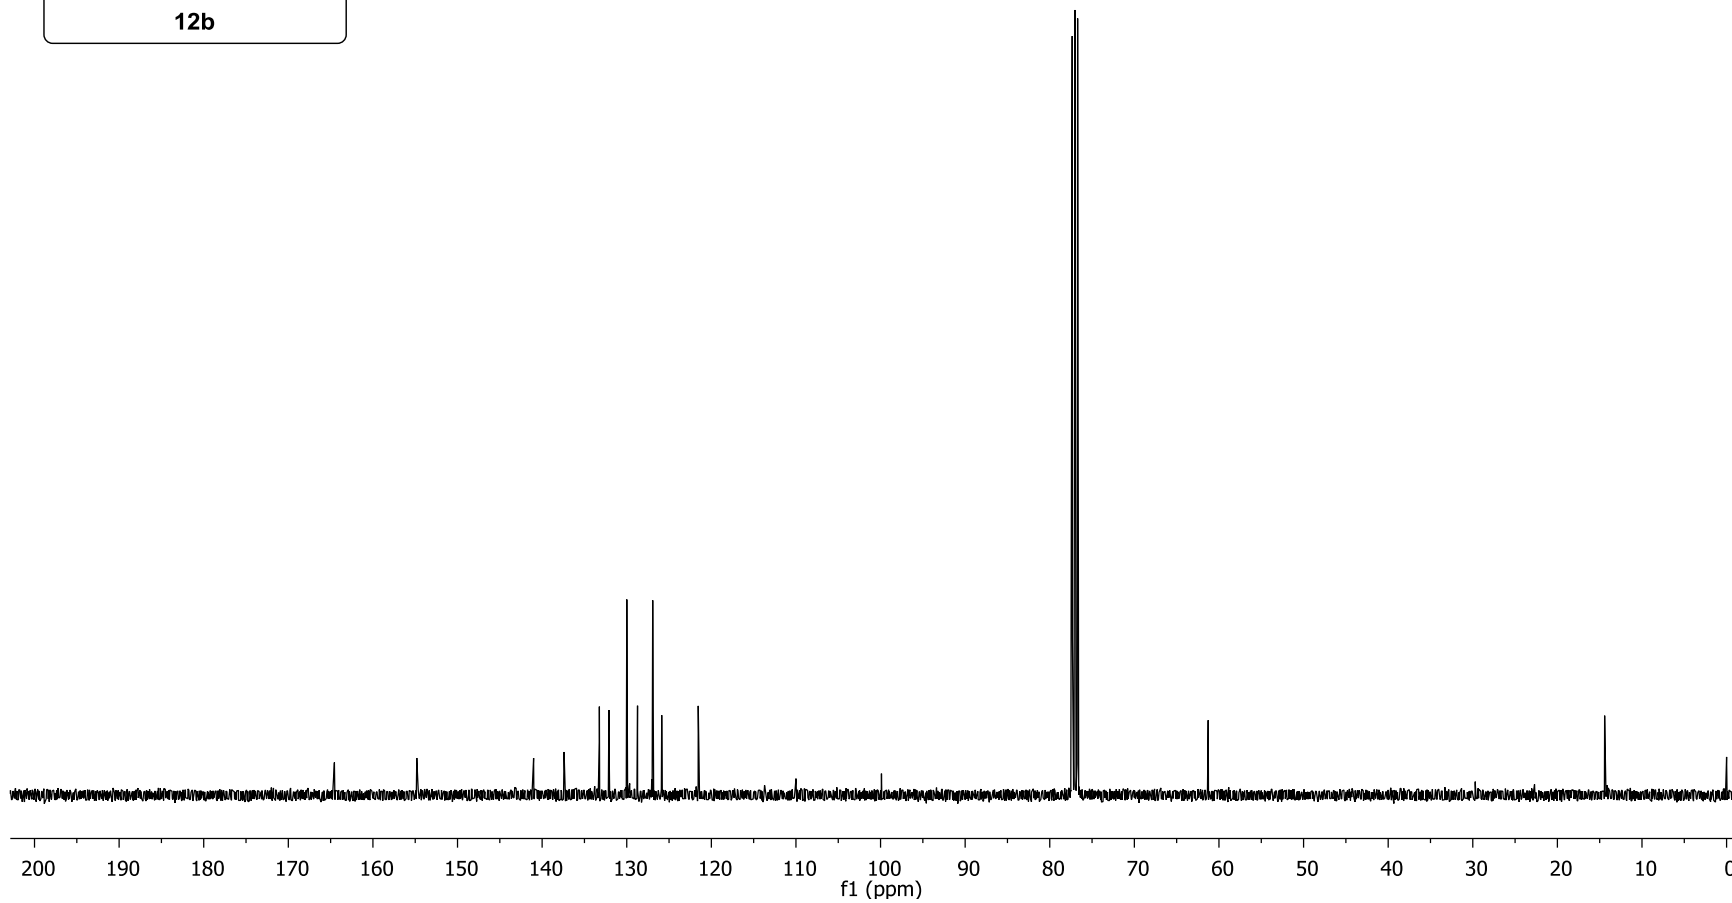

Sel1d IB381-1F1  
1D Selective Gradient NOESY  
freq: 6.687ppm 1 1

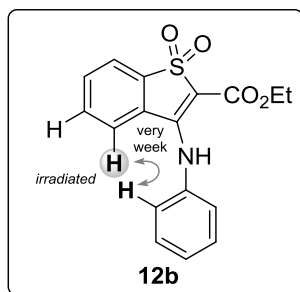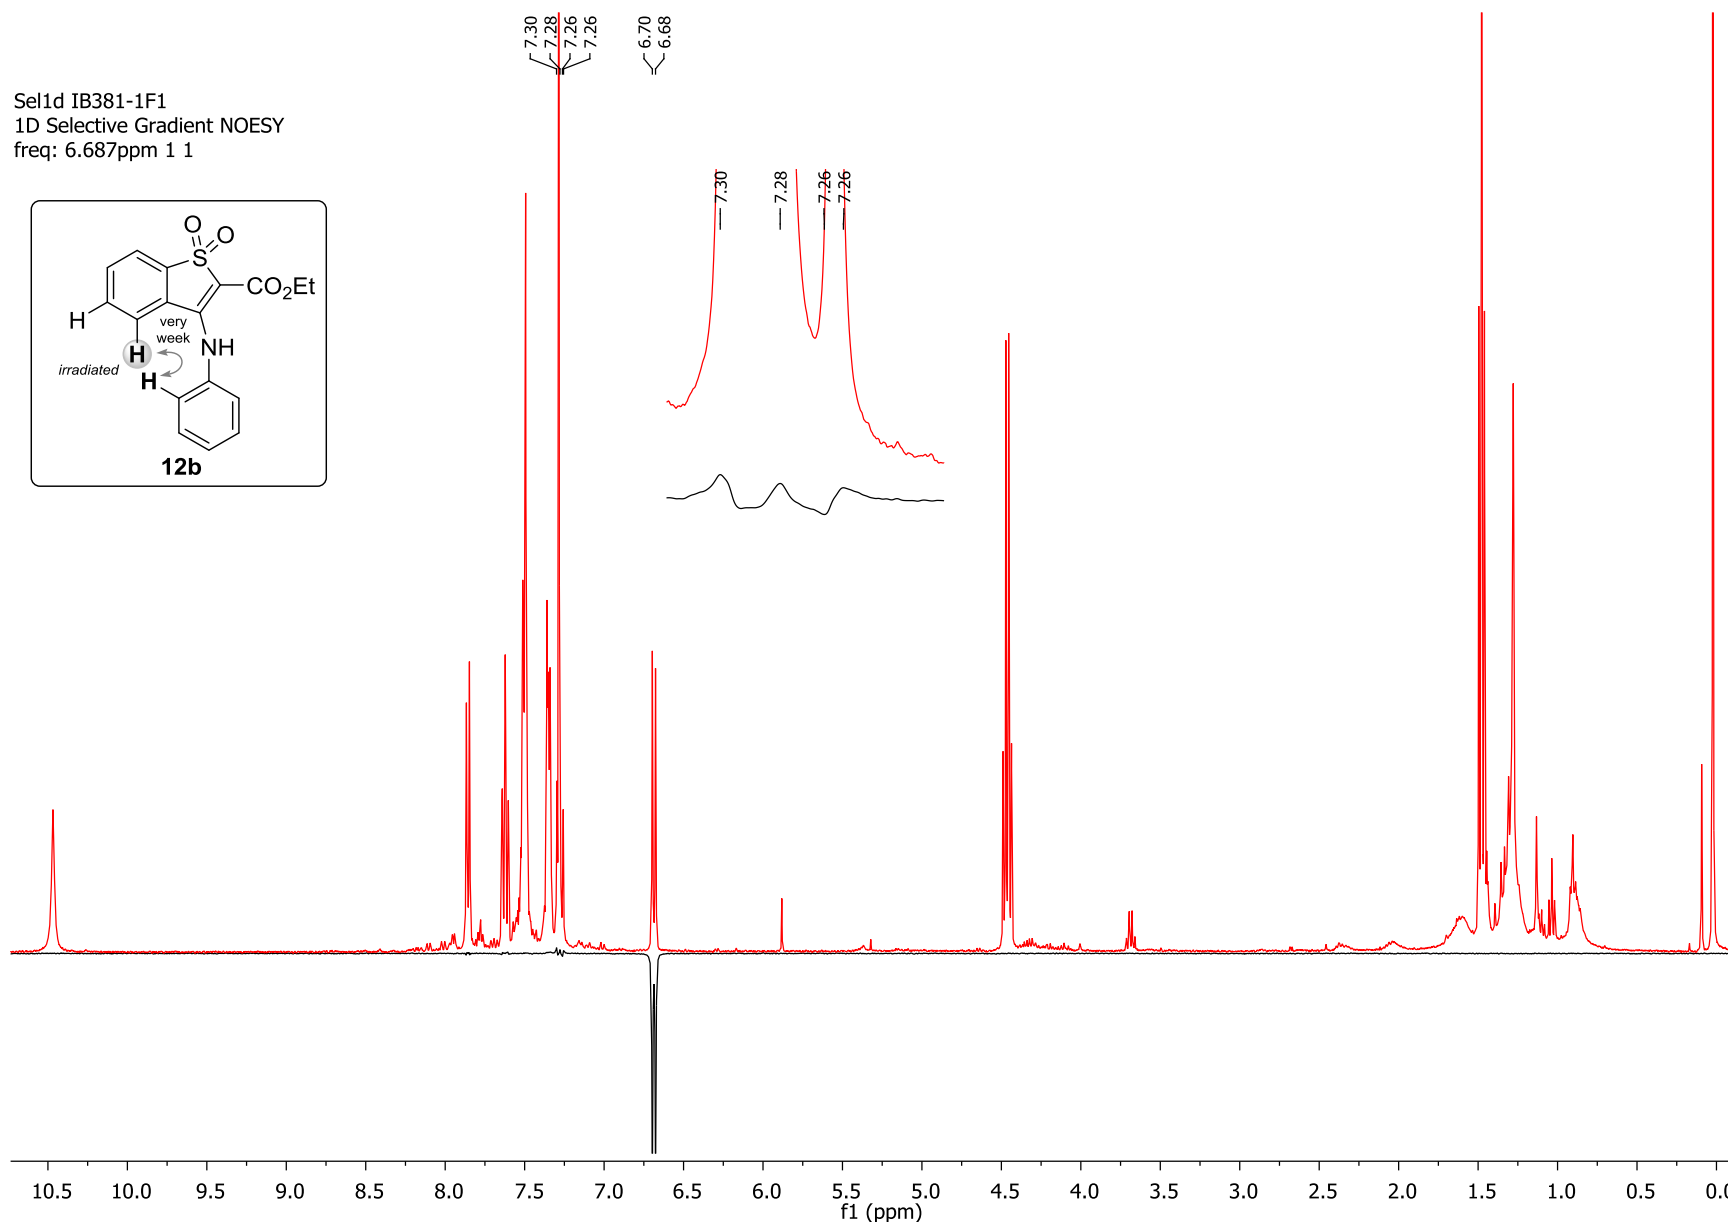

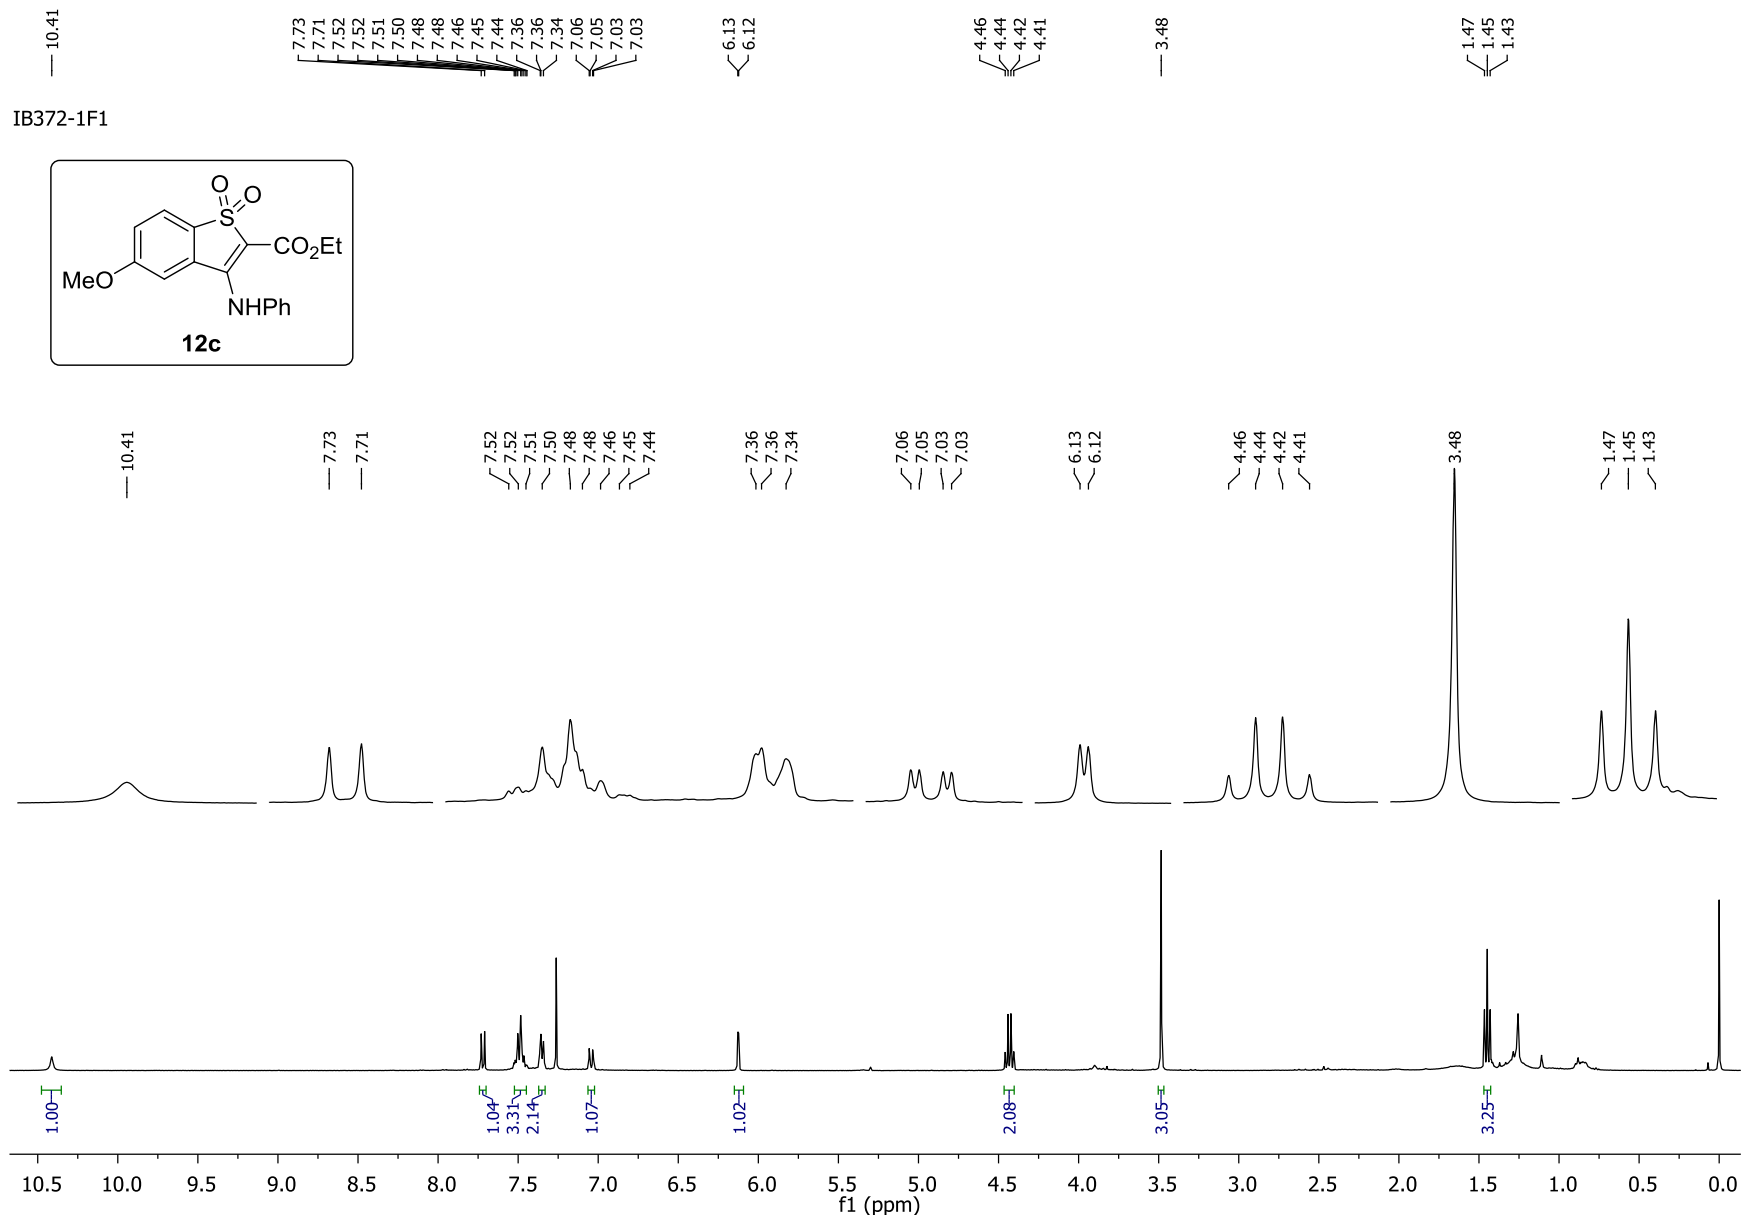

IB372-1F1

— 164.52  
— 162.26

— 154.43

— 137.37  
— 132.70  
— 129.97  
— 128.79  
— 127.75  
— 127.24  
— 122.81  
— 118.31

— 111.59

— 100.73

— 61.23

— 55.39

— 14.42

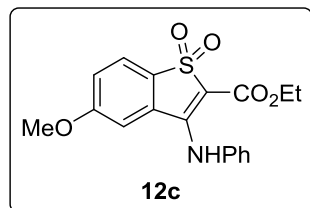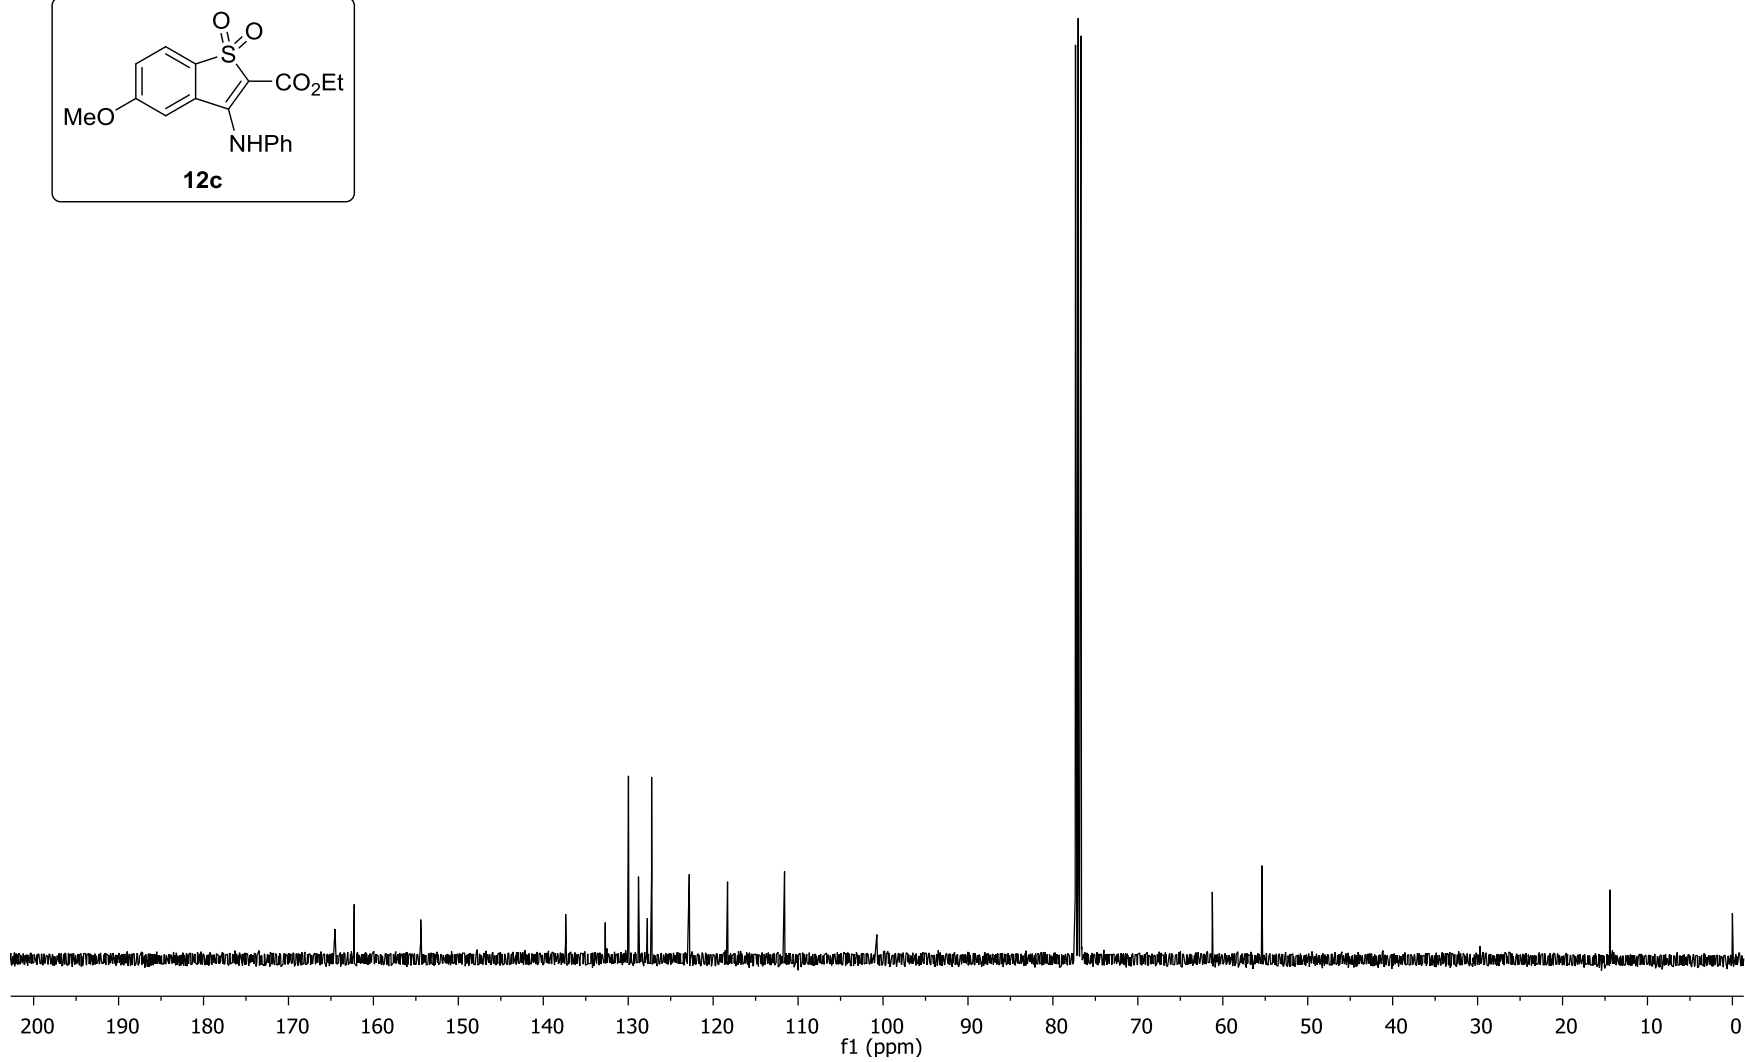

Sel1d IB372-1F1  
1D Selective Gradient NOESY  
freq: 6.146ppm 1 1

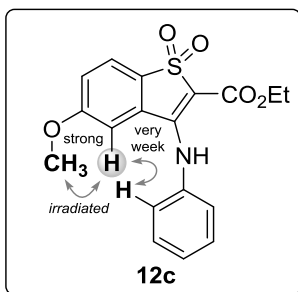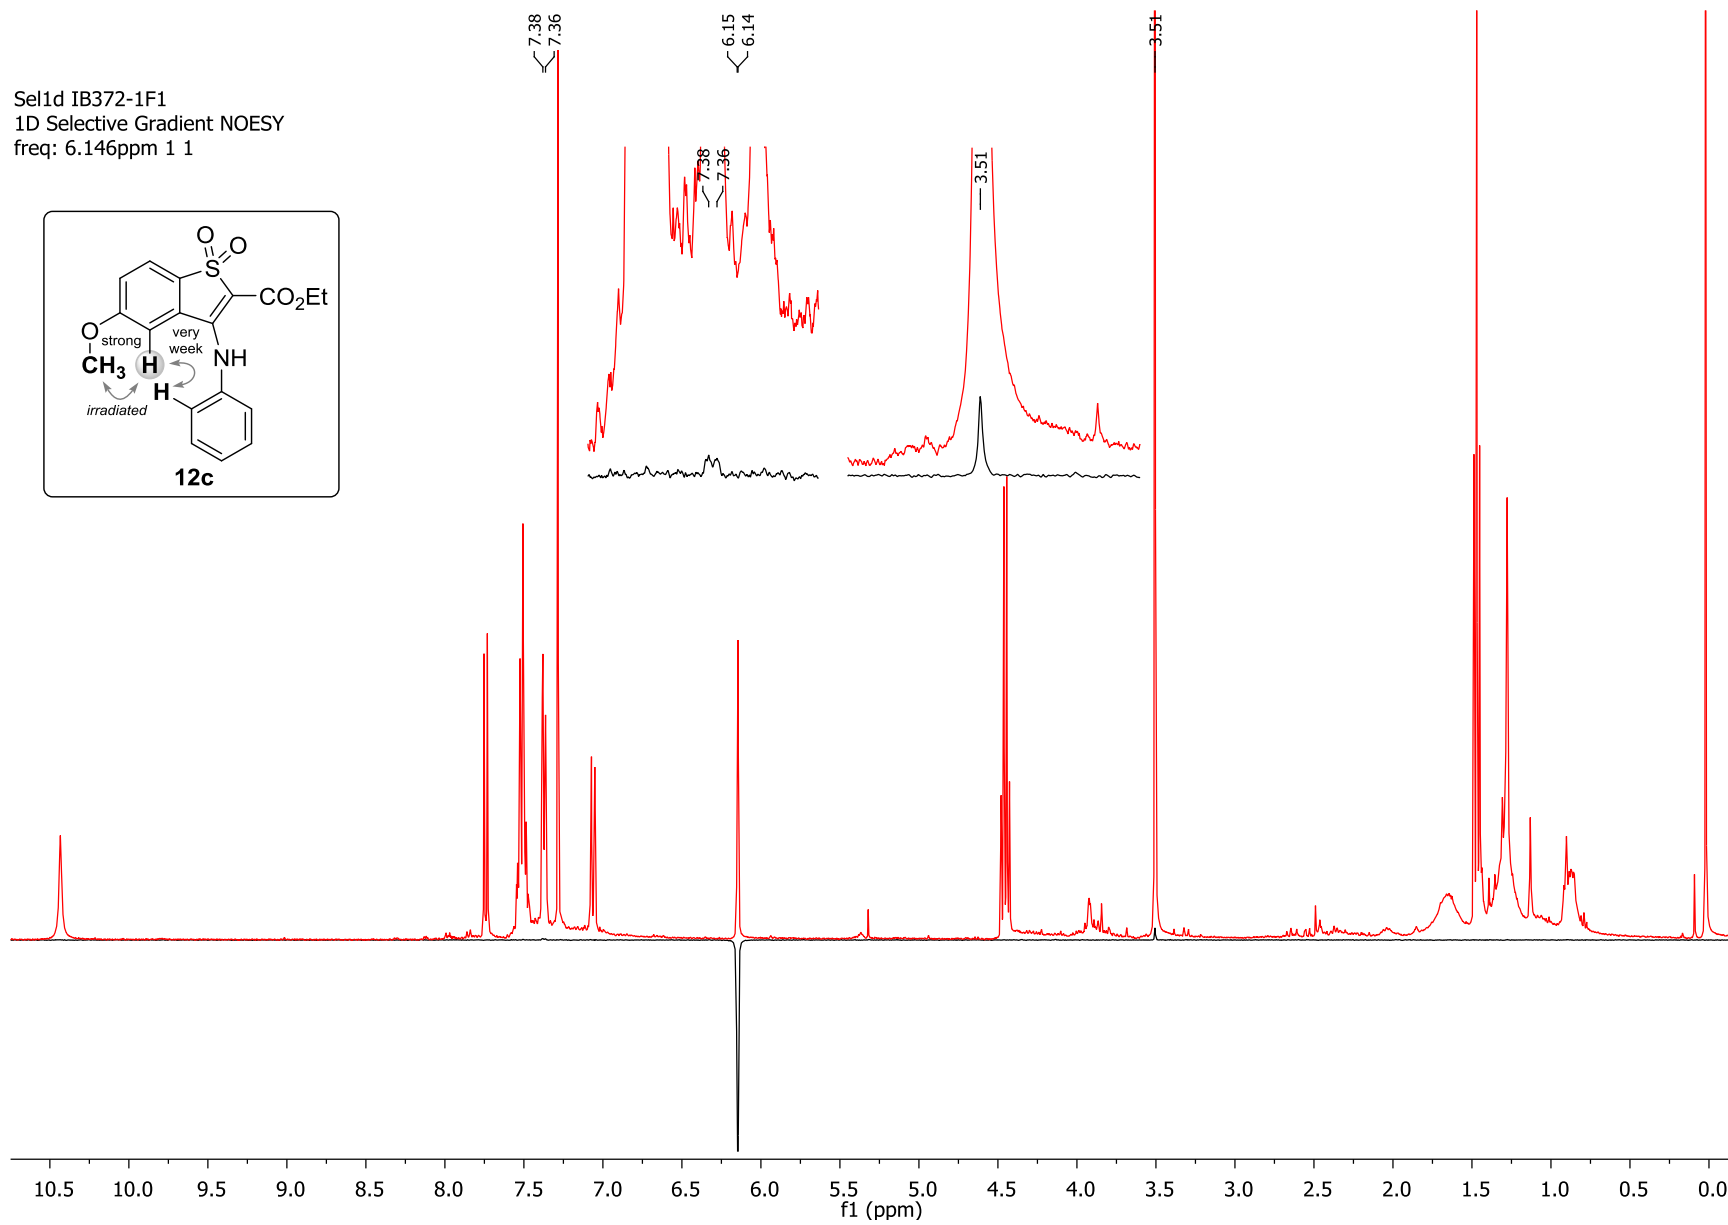

IB364-4F1

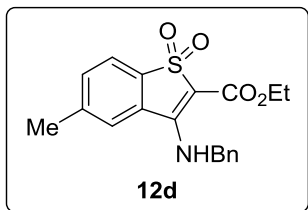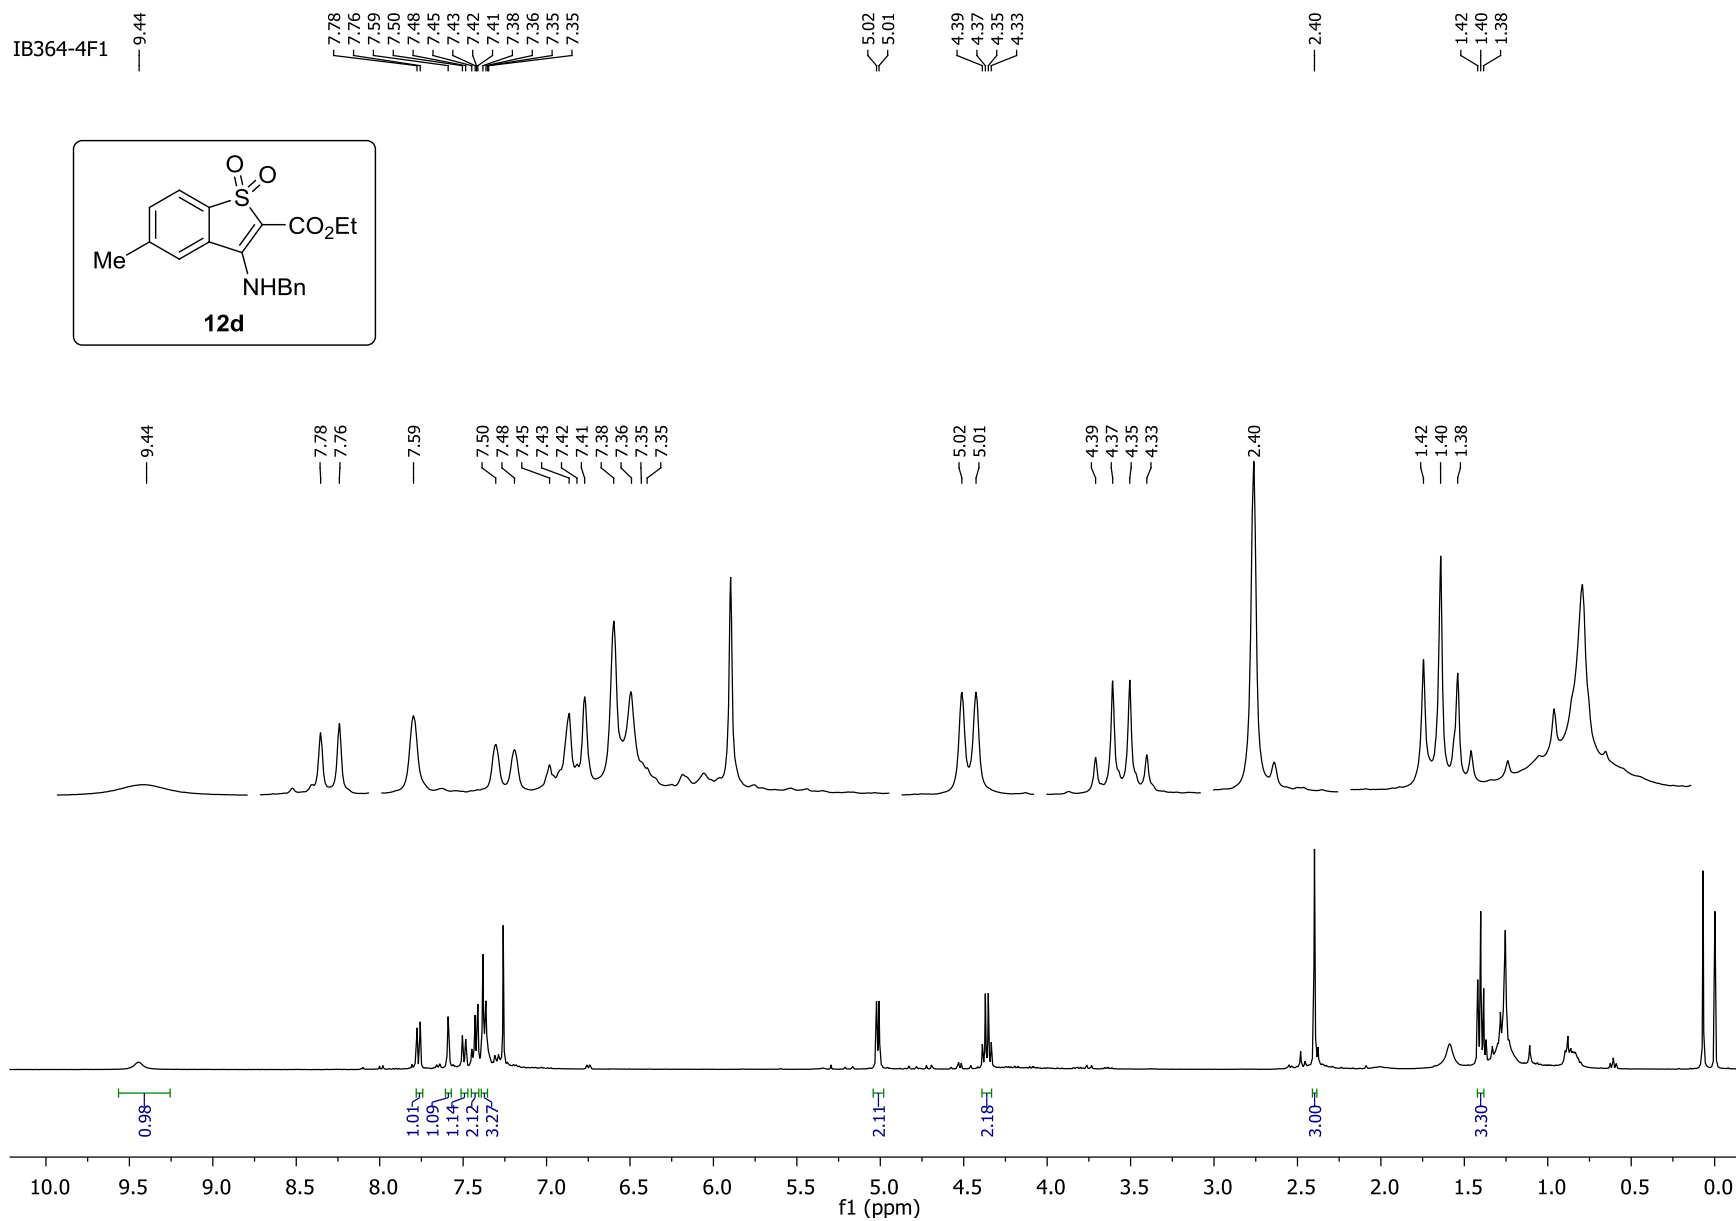

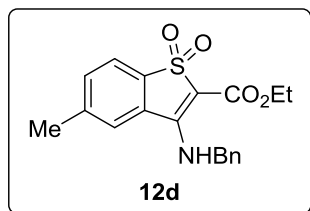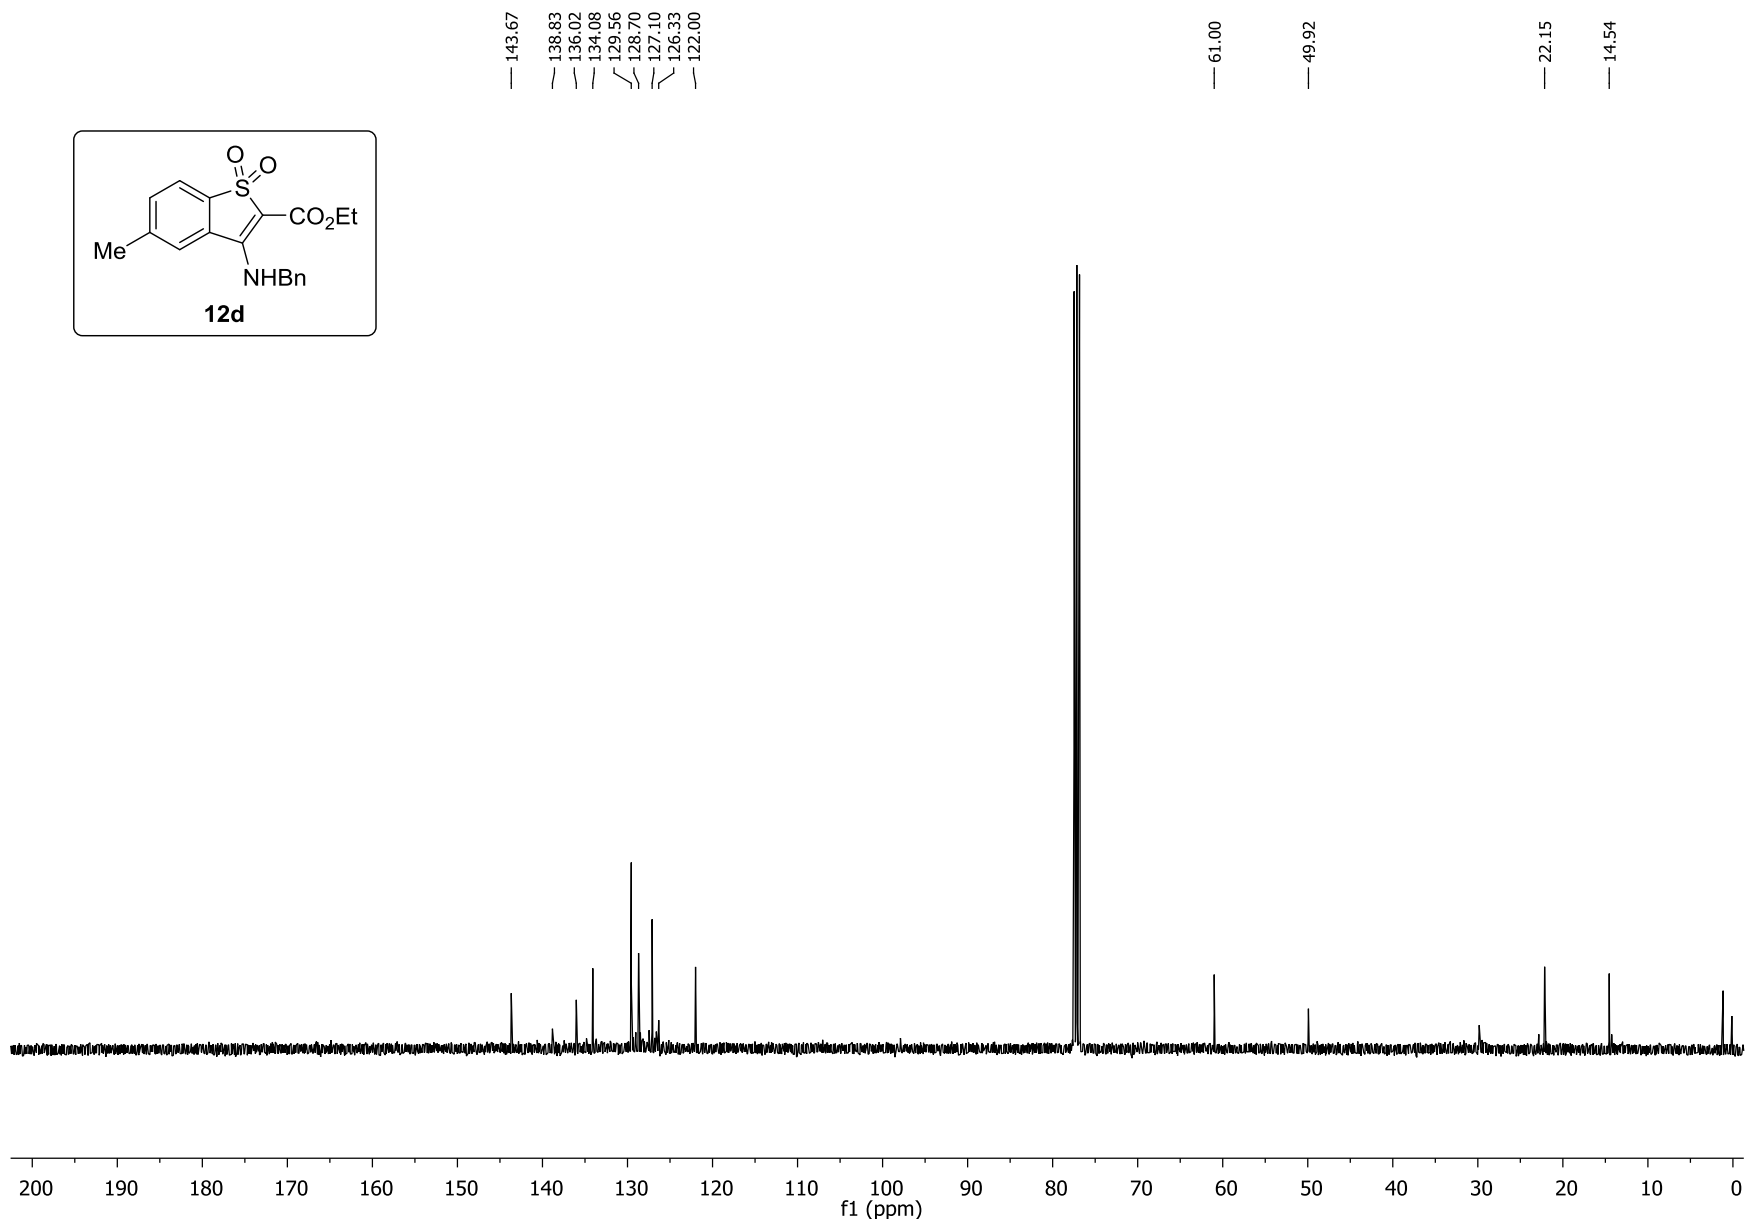



Sel1d IB364-4F1  
1D Selective Gradient NOESY  
freq: 7.615ppm 1 1

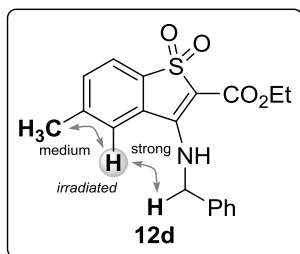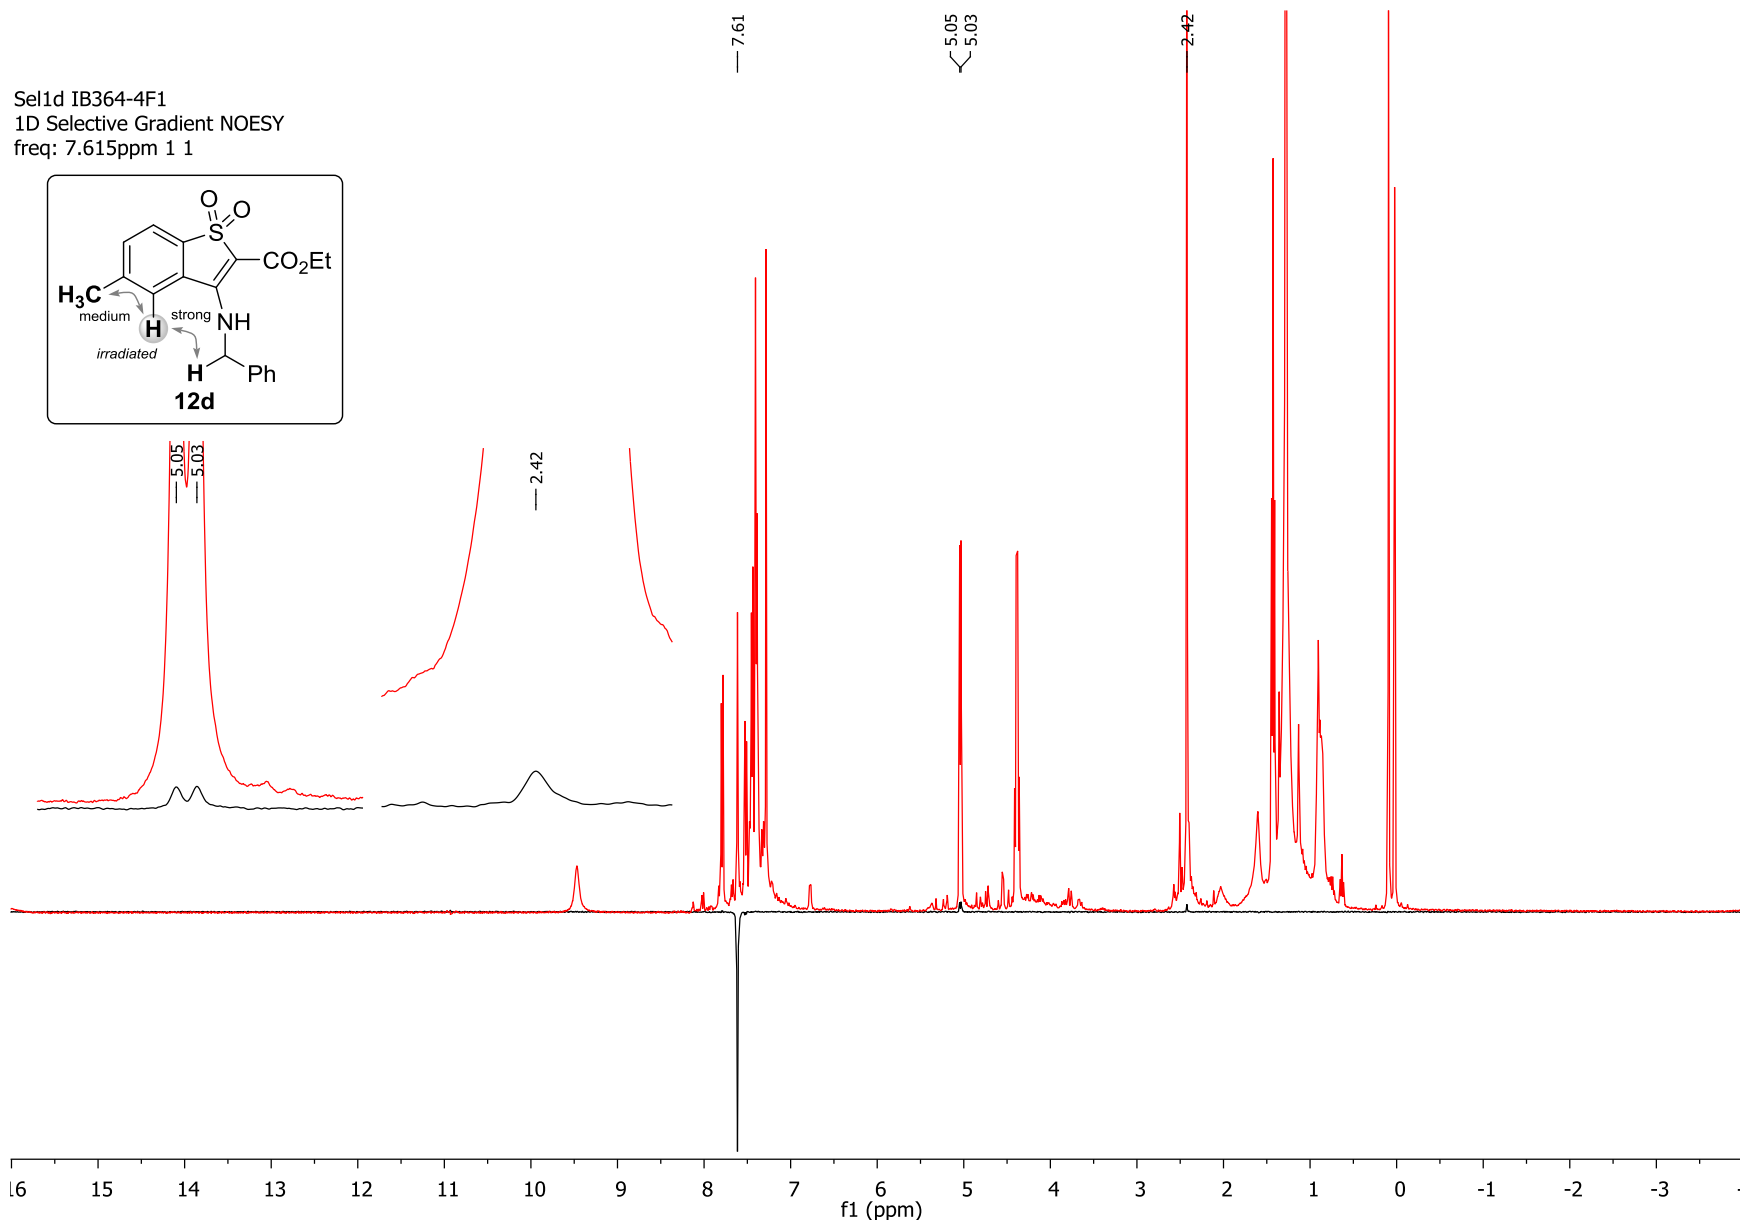

## Computational Methods

All structures were initially optimized using density functional theory (DFT) by using the B3LYP<sup>1</sup> functional as implemented in Gaussian 09.<sup>2</sup> Optimizations were carried out in a solvent model (IEFPCM, solvent = toluene)<sup>3</sup> by using the 6-31G\*\* basis set for non-metallic atoms and Stuttgart/Dresden (SDD)<sup>4</sup> effective core potential for palladium. The critical stationary points were characterized by frequency calculations in order to verify that they have the right number of imaginary frequencies, and the intrinsic reaction coordinates (IRC)<sup>5</sup> were followed to verify the energy profiles connecting the key transition structures to the correct associated local minima.

The energies showed in the manuscript have been refined by single-point calculations with the M06<sup>6</sup> functional and def2tzvpp basis set on the previously optimized structures. The values correspond to Free Gibbs energies and are given in kcal/mol. These energies are relative to the initial mixtures of starting material and corresponding palladium complexes, marked as G = 0.0 kcal/mol in each Figure.

---

<sup>1</sup> (a) Lee, C.; Yang, W.; Parr, R. G. *Phys. Rev. B* **1988**, *37*, 785–789; (b) Becke, A. D. *J. Chem. Phys.* **1993**, *98*, 5648–5652; (c) Kohn, W.; Becke, A. D.; Parr, R. G. *J. Phys. Chem.* **1996**, *100*, 12974–12980.

<sup>2</sup> Gaussian 09, Revision D.01; Frisch, M. J.; Trucks, G. W.; Schlegel, H. B.; Scuseria, G. E.; Robb, M. A.; Cheeseman, J. R.; Scalmani, G.; Barone, V.; Mennucci, B.; Petersson, G. A.; Nakatsuji, H.; Caricato, M.; Li, X.; Hratchian, H. P.; Izmaylov, A. F.; Bloino, J.; Zheng, G.; Sonnenberg, J. L.; Hada, M.; Ehara, M.; Toyota, K.; Fukuda, R.; Hasegawa, J.; Ishida, M.; Nakajima, T.; Honda, Y.; Kitao, O.; Nakai, H.; Vreven, T.; Montgomery, J. A.; Peralta, J. E.; Ogliaro, F.; Bearpark, M.; Heyd, J. J.; Brothers, E.; Kudin, K. N.; Staroverov, V. N.; Keith, T.; Kobayashi, R.; Normand, J.; Raghavachari, K.; Rendell, A.; Burant, J. C.; Iyengar, S. S.; Tomasi, J.; Cossi, M.; Rega, N.; Millam, J. M.; Klene, M.; Knox, J. E.; Cross, J. B.; Bakken, V.; Adamo, C.; Jaramillo, J.; Gomperts, R.; Stratmann, R. E.; Yazyev, O.; Austin, A. J.; Cammi, R.; Pomelli, C.; Ochterski, J. W.; Martin, R. L.; Morokuma, K.; Zakrzewski, V. G.; Voth, G. A.; Salvador, P.; Dannenberg, J. J.; Dapprich, S.; Daniels, A. D.; Farkas, O.; Foresman, J. B.; Ortiz, J. V.; Cioslowski, J.; Fox, D. J. Gaussian, Inc., Wallingford CT, **2013**.

<sup>3</sup> (a) Cancès, E.; Mennucci, B.; Tomasi, J. *J. Chem. Phys.* **1997**, *107*, 3032–3047; (b) Cossi, M.; Barone, V.; Mennucci, B.; Tomasi, J. *Chem. Phys. Lett.* **1998**, *286*, 253–260; (c) Tomasi, J.; Mennucci, B.; Cancès, E. *J. Mol. Struct. (Theochem)* **1999**, *464*, 211–226.

<sup>4</sup> (a) Dolg, M.; Wedig, U.; Stoll, H.; Preuss, H. *J. Chem. Phys.* **1987**, *86*, 866–872; (b) Andrae, D.; Haussermann, U.; Dolg, M.; Stoll, H.; Preuss, H. *Theor. Chim. Acta* **1990**, *77*, 123–141.

<sup>5</sup> Gonzalez, C.; Schlegel, H. B. *J. Phys. Chem.* **1990**, *94*, 5523–5527.

<sup>6</sup> Zhao, Y.; Truhlar, D. G. *Theor. Chem. Acc.* **2008**, *120*, 215–241.

## DFT Studies of the Reaction Mechanism

For a better understanding of the mechanism we investigated the different reaction pathways with DFT calculations. Experimentally, the best results were achieved with palladium acetate [Pd(OAc)<sub>2</sub>] in the presence of aromatic phosphines. For this system, the most logical mechanistic sequence would involve the coordination of the Pd(II) species to the substrate followed by a concerted metalation-deprotonation (CMD) step, by a transition state in which the reacting acetate group is acting as a  $\kappa^2$  ligand. The other acetate shows monodentate coordination, and palladium binds also the alkyne, like in **TS1** (Figure 1). Next, the Pd–C bond formed in **8** adds to the triple bond through **TS2**, leading to the alkenyl–Pd(II) intermediate **9**. The final protodemetalation with acetic acid via **TS4** renders the adduct **21**, recovering the active Pd(II)–acetate species.

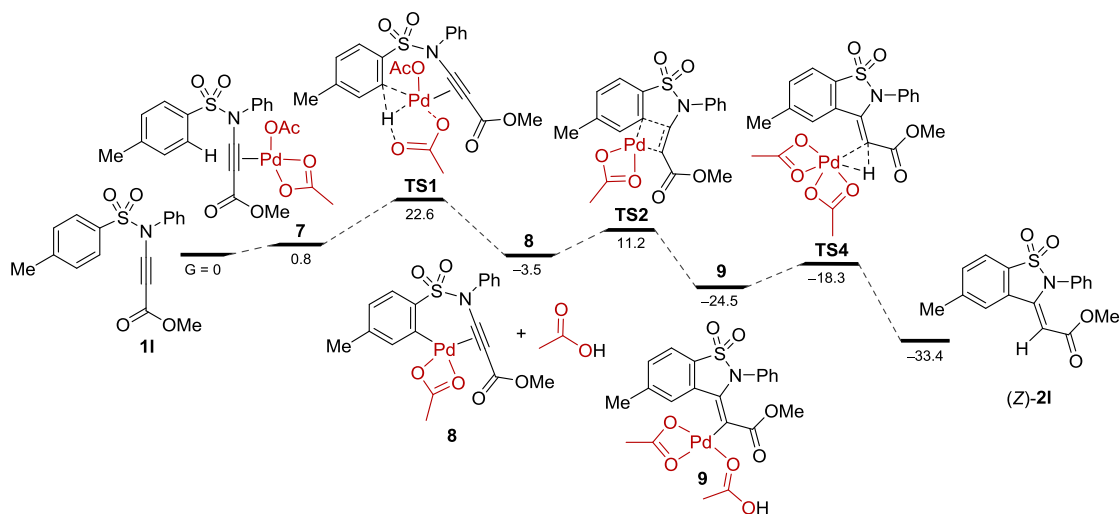

**Figure 1.** Computed Pathway for Cyclization of **11** without Isomerization Step. Free Energies (298 K) with Respect to Starting Materials are Shown in kcal/mol.

The computed activation energies showed that the whole cycle is feasible. The initial coordination of Pd to the alkyne in **7** requires a change in denticity of one of the acetate ligands, from  $\kappa^2$  to  $\kappa^1$ , but it is uphill in only 0.8 kcal/mol. Then, the transition state of the C–H abstraction has an activation barrier of 22.6 kcal/mol (from the separate reactants **11** and palladium acetate), becoming rate determining step, because the following steps of the catalytic cycle, namely insertion and protonation, are much lower in energy, presenting affordable values (14.7 and 6.2 kcal/mol). Interestingly, this mechanism would only explain the formation of the experimental minor **(Z)-21** isomer, with the ester moiety *cis* to the nitrogen atom. There must be a point during the catalytic cycle, where the **(Z)** and the **(E)**-isomers must interconvert. Intermediate **9** and also the final adduct **2** are good candidates, and the calculations showed that in both cases the **E**-species was thermodynamically more stable than the **Z**-isomer by 2.5 kcal/mol (**2**) and 2.0 kcal/mol (**9**; Figure 2). Thus, we hypothesize that equilibration processes would explain the formation of the experimental major isomers under thermodynamic conditions. To validate this idea, the two isomers of the final product were independently subjected to the experimental reaction conditions, giving rise to the product mixture, consisting of 85:15 **E/Z** ratio. Yet another plausible situation is that the equilibration

occurs at the intermediate **9** stage, probably by protonation with acetic acid and formation of an enol intermediate (**10**), allowing the free rotation of the internal CC bond. We found that the enol structure lies 23.1 kcal/mol higher in energy than the previous alkenyl-Pd intermediate (**9**), confirming the feasibility of this or related isomerization processes.

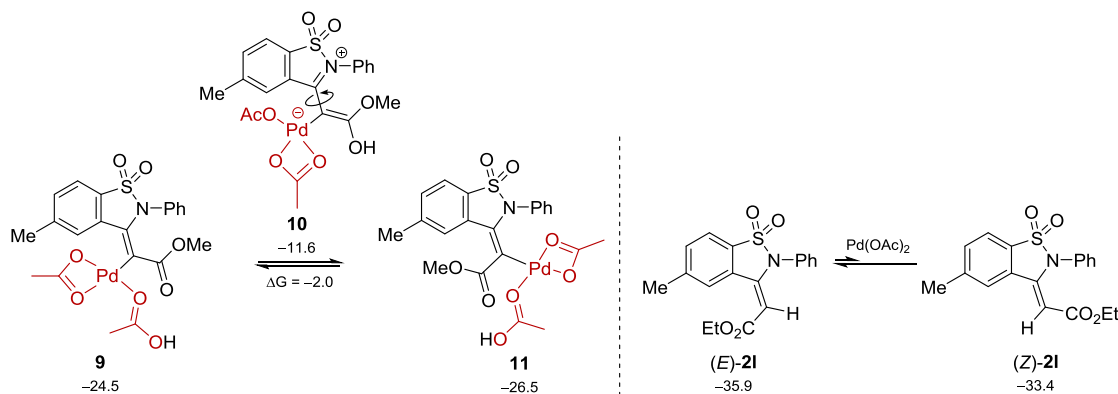

**Figure 2.** Equilibration Between (*E*)- and (*Z*)-isomers of **21**. Free Energies (298 K) with Respect to Starting Materials are Shown in kcal/mol.

The experimental case where the palladium atom binds one phosphine molecule (modeled with one  $\text{PPh}_3$ ) was also computationally analyzed, and a similar mechanism was found (Figure 3). For example, the activation energy of the CMD step almost equals the previous one (**TS5**, 23.7 kcal/mol), whilst the addition to the triple bond is slightly more facile, 9.7 kcal/mol (from 7.4 to 17.1 kcal/mol). Surprisingly, the presence of the phosphine disfavors the final protodemetalation to a large extent, increasing its activation energy from 6.2 kcal/mol (Figure 1) to 15.3 kcal/mol (**TS7**). Nonetheless, this effect does not alter the overall mechanism, since C–H activation in **TS5** is still rate limiting.

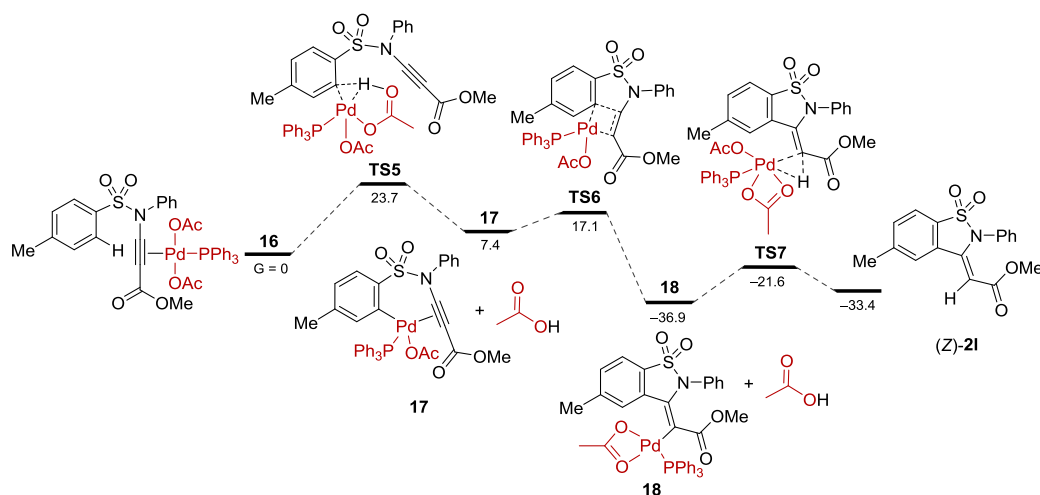

**Figure 3.** Computed Pathway for Cyclization of **16**. Free Energies (298 K) with Respect to Starting Materials are Shown in kcal/mol.

In the presence of phosphine (Figure 3), the proposed transition state for CMD (**TS5**) involves the decooordination of palladium from the alkyne during C–H abstraction, binding to three oxygens of the two acetate ligands. We checked also the possibility that the palladium center remains bound to the alkyne during the process. In this case, the spectator acetate must leave the coordination sphere of the metal, leaving a cationic species, like in **TS8** (Figure 4). This situation was proven to be highly disfavored, and the activation energy rises to an unaffordable value of 51.0 kcal/mol. Thus, **TS8** cannot compete with the neutral version **TS5** examined in Figure 3.

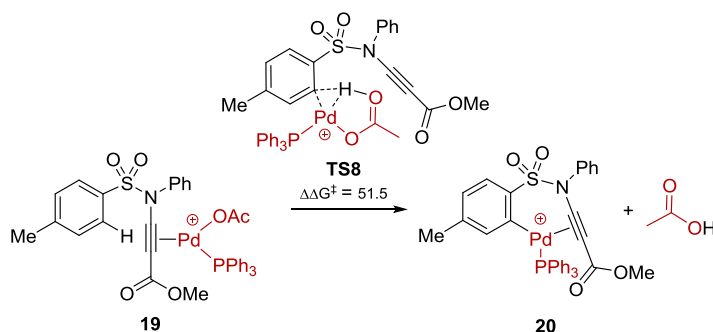

**Figure 4.** Computed Pathway for Cyclization of **19**. Free Energies (298 K) with Respect to Starting Materials are Shown in kcal/mol.

The most intriguing experimental data is the fact that Pd(0) species are also able to catalyze the process, to a similar extent of that of Pd(II) species, although with the formation of significant amounts of side products **3–5**. It is well known that the CMD processes are usually catalyzed by Pd(II) or Pd(IV) species but not Pd(0), and also that they need the presence of an internal or external basic ligand, like acetate in the case of Pd(OAc)<sub>2</sub>. The fact that in the Pd(0) promoted reaction some of the side products are derived from the cleavage of the C–N bond of the starting material (like **3** and **4**), led us to hypothesize that the first step of this process could be the oxidative addition to the of Pd(0) to the alkyne–sulfonamide bond, like in **TS9** (Figure 5).

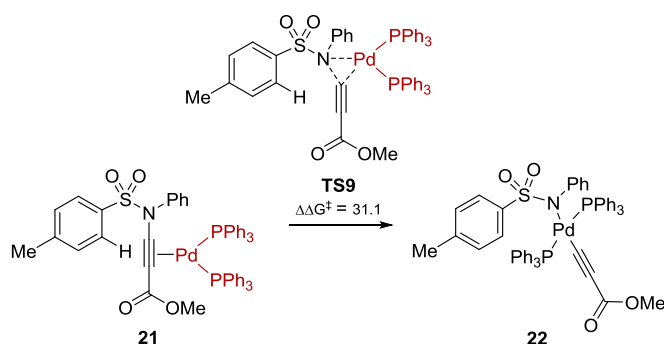

**Figure 5.** Computed Pathway for Insertion of Palladium(0) into C–N Bond. Free Energies (298 K) with Respect to Starting Materials are Shown in kcal/mol.

The computed activation energy of this step is moderate-high, but affordable at the reflux temperatures required for this process. The formation of palladium species **22** might explain the presence of active Pd(II) species in the reaction medium and the appearance of adducts lacking the N-alkyne bond.

Finally, the type of substitution at the terminal carbon of alkyne seems to exert a large influence on the reaction outcome. We first compared the reactivity of the methyl (computational model) and ethyl esters (experimental substrate), and gratefully found that the energies for the crucial steps do not differ significantly. The computed difference of 0.2 kcal/mol between both esters during the rate determining C–H activation transition state (Figure 6) is meaningless, validating the use of methyl ester as a model in our computational study.

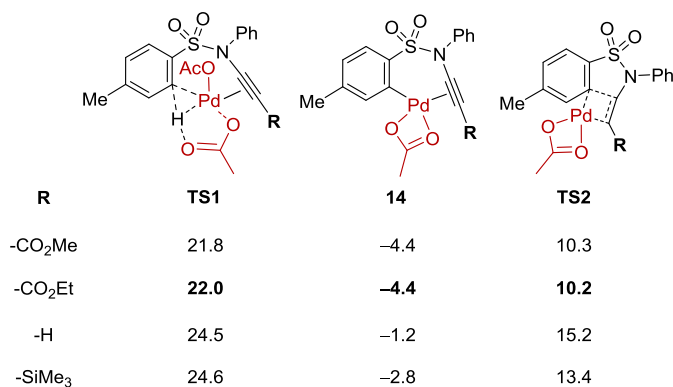

**Figure 6.** Energy Values for the C–H Activation and Insertion Transition States for Different Substituents at Alkyne Terminus. Free Energies (298 K) with Respect to Starting Materials are Shown in kcal/mol.

A different outcome was obtained in the case of terminal alkyne (R = H) and silylated substrate (R = SiMe<sub>3</sub>), which were found to show higher energy values in general. For the crucial C–H activation step, the barriers are >2.5 kcal/mol higher than for the ester derivatives (TS1, 24.5 and 24.6 kcal/mol), corresponding to more than 100 times slower reaction rate. This data are fully consistent with the absolute lack of reactivity shown by those substrates in the experimental conditions. Although not significant for the reaction rate, the insertion step was also predicted to be a few kcal/mol higher for terminal or silylated alkynes (TS2, Figure 6) than for ester based compounds.

## Cartesian coordinates of the structures involved in the computational study

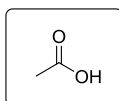

Thermal correction to Gibbs Free Energy = 0.034863 Hartree

Electronic energy = -228.893110039 Hartree

Cartesian Coordinates of the computed structure:

| Center Number | Atomic Number | Atomic Type | Coordinates (Angstroms) |           |           |
|---------------|---------------|-------------|-------------------------|-----------|-----------|
|               |               |             | X                       | Y         | Z         |
| 1             | 8             | 0           | -0.729181               | -1.081247 | -0.000775 |
| 2             | 6             | 0           | -0.037289               | 0.014673  | -0.008831 |
| 3             | 8             | 0           | -0.705476               | 1.096956  | -0.000861 |
| 4             | 6             | 0           | 1.452570                | -0.017698 | -0.001592 |
| 5             | 1             | 0           | 1.843575                | 0.838942  | -0.553990 |
| 6             | 1             | 0           | 1.803632                | 0.056653  | 1.034166  |
| 7             | 1             | 0           | 1.818513                | -0.952757 | -0.429146 |
| 8             | 1             | 0           | -2.480143               | -0.050360 | 0.024599  |

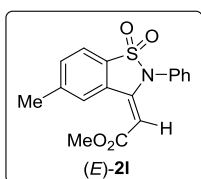

Thermal correction to Gibbs Free Energy = 0.235865 Hartree

Electronic energy = -1410.37285199 Hartree

| Center Number | Atomic Number | Atomic Type | Coordinates (Angstroms) |           |           |
|---------------|---------------|-------------|-------------------------|-----------|-----------|
|               |               |             | X                       | Y         | Z         |
| 1             | 6             | 0           | 1.329472                | -1.735947 | 0.005756  |
| 2             | 6             | 0           | 2.402470                | -2.614890 | 0.024929  |
| 3             | 6             | 0           | 3.684707                | -2.070282 | 0.040197  |
| 4             | 6             | 0           | 1.475171                | -0.343552 | 0.001619  |
| 5             | 6             | 0           | 2.773440                | 0.178767  | 0.015801  |
| 6             | 6             | 0           | 3.881310                | -0.679355 | 0.033119  |
| 7             | 1             | 0           | 2.246386                | -3.687988 | 0.030583  |
| 8             | 1             | 0           | 2.907405                | 1.252893  | 0.016124  |
| 9             | 8             | 0           | -0.791747               | -2.842686 | 1.242724  |
| 10            | 16            | 0           | -0.370902               | -2.219400 | -0.012759 |
| 11            | 8             | 0           | -0.755166               | -2.855318 | -1.275320 |

|    |   |   |           |           |           |
|----|---|---|-----------|-----------|-----------|
| 12 | 6 | 0 | -2.266194 | -0.282211 | 0.001079  |
| 13 | 6 | 0 | -2.899770 | -0.031506 | 1.223478  |
| 14 | 6 | 0 | -2.997689 | -0.305739 | -1.189993 |
| 15 | 6 | 0 | -4.271383 | 0.217555  | 1.245900  |
| 16 | 1 | 0 | -2.315388 | -0.038543 | 2.137210  |
| 17 | 6 | 0 | -4.370552 | -0.062686 | -1.156601 |
| 18 | 1 | 0 | -2.486889 | -0.522225 | -2.122383 |
| 19 | 6 | 0 | -5.005378 | 0.201414  | 0.057859  |
| 20 | 1 | 0 | -4.766741 | 0.412979  | 2.191208  |
| 21 | 1 | 0 | -4.943286 | -0.083710 | -2.078454 |
| 22 | 1 | 0 | -6.074369 | 0.390108  | 0.080383  |
| 23 | 7 | 0 | -0.862840 | -0.562837 | -0.027453 |
| 24 | 6 | 0 | 0.174570  | 0.376895  | -0.018607 |
| 25 | 6 | 0 | -0.139000 | 1.704877  | -0.036646 |
| 26 | 6 | 0 | 0.715040  | 2.888293  | -0.029869 |
| 27 | 8 | 0 | 1.933310  | 2.982511  | 0.003157  |
| 28 | 8 | 0 | -0.078545 | 3.995850  | -0.067585 |
| 29 | 6 | 0 | 0.618571  | 5.247575  | -0.065683 |
| 30 | 1 | 0 | 1.273652  | 5.328777  | -0.937458 |
| 31 | 1 | 0 | -0.155856 | 6.014174  | -0.099009 |
| 32 | 1 | 0 | 1.224556  | 5.354480  | 0.837623  |
| 33 | 1 | 0 | -1.194384 | 1.945385  | -0.060857 |
| 34 | 6 | 0 | 5.279941  | -0.111073 | 0.025650  |
| 35 | 1 | 0 | 5.934944  | -0.652586 | 0.714909  |
| 36 | 1 | 0 | 5.726324  | -0.186441 | -0.973147 |
| 37 | 1 | 0 | 5.281324  | 0.944272  | 0.308715  |
| 38 | 1 | 0 | 4.545478  | -2.732980 | 0.059132  |

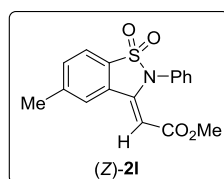

Thermal correction to Gibbs Free Energy = 0.237762 Hartree

Electronic energy = -1410.37083386 Hartree

| Center Number | Atomic Number | Atomic Type | Coordinates (Angstroms) |           |           |
|---------------|---------------|-------------|-------------------------|-----------|-----------|
|               |               |             | X                       | Y         | Z         |
| 1             | 6             | 0           | 2.176606                | -0.919096 | -0.083294 |
| 2             | 6             | 0           | 3.500836                | -1.340817 | -0.046251 |



|    |    |   |           |           |           |
|----|----|---|-----------|-----------|-----------|
| 3  | 6  | 0 | 4.480887  | -0.372895 | 0.144736  |
| 4  | 6  | 0 | 1.800834  | 0.414617  | 0.044215  |
| 5  | 6  | 0 | 2.805615  | 1.373600  | 0.219185  |
| 6  | 6  | 0 | 4.147851  | 0.988909  | 0.282220  |
| 7  | 1  | 0 | 3.758730  | -2.388586 | -0.161328 |
| 8  | 1  | 0 | 2.552138  | 2.423990  | 0.308154  |
| 9  | 8  | 0 | 0.503569  | -2.807438 | 0.842492  |
| 10 | 16 | 0 | 0.759356  | -1.954338 | -0.317867 |
| 11 | 8  | 0 | 0.735532  | -2.545275 | -1.655394 |
| 12 | 6  | 0 | -1.676991 | -0.889268 | 0.092189  |
| 13 | 6  | 0 | -2.154534 | -0.607451 | 1.374290  |
| 14 | 6  | 0 | -2.473239 | -1.564049 | -0.834433 |
| 15 | 6  | 0 | -3.454410 | -0.975719 | 1.715425  |
| 16 | 1  | 0 | -1.514249 | -0.103819 | 2.090189  |
| 17 | 6  | 0 | -3.764455 | -1.946672 | -0.476039 |
| 18 | 1  | 0 | -2.079637 | -1.772593 | -1.823397 |
| 19 | 6  | 0 | -4.259292 | -1.647797 | 0.793818  |
| 20 | 1  | 0 | -3.831971 | -0.751669 | 2.708889  |
| 21 | 1  | 0 | -4.386961 | -2.469878 | -1.195643 |
| 22 | 1  | 0 | -5.269302 | -1.940098 | 1.066607  |
| 23 | 7  | 0 | -0.322565 | -0.572929 | -0.264231 |
| 24 | 6  | 0 | 0.336816  | 0.638986  | -0.076051 |
| 25 | 6  | 0 | -0.195559 | 1.890173  | -0.033272 |
| 26 | 6  | 0 | -1.556300 | 2.308928  | -0.375017 |
| 27 | 8  | 0 | -2.415383 | 1.659512  | -0.941560 |
| 28 | 8  | 0 | -1.737629 | 3.610293  | -0.009408 |
| 29 | 6  | 0 | -3.014679 | 4.160191  | -0.354930 |
| 30 | 1  | 0 | -3.821762 | 3.602541  | 0.127266  |
| 31 | 1  | 0 | -2.999143 | 5.190846  | 0.000196  |
| 32 | 1  | 0 | -3.171312 | 4.131260  | -1.437205 |
| 33 | 1  | 0 | 0.475817  | 2.700937  | 0.217103  |
| 34 | 6  | 0 | 5.234955  | 2.014260  | 0.495938  |
| 35 | 1  | 0 | 5.722032  | 1.872911  | 1.468194  |
| 36 | 1  | 0 | 6.013013  | 1.930728  | -0.270254 |
| 37 | 1  | 0 | 4.837777  | 3.031802  | 0.465903  |
| 38 | 1  | 0 | 5.524743  | -0.670593 | 0.185394  |

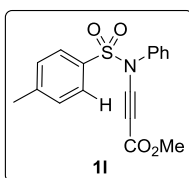

Thermal correction to Gibbs Free Energy = 0.231717 Hartree

Electronic energy = - 1410.31157817 Hartree

| Center Number | Atomic Number | Atomic Type | Coordinates (Angstroms) |           |           |
|---------------|---------------|-------------|-------------------------|-----------|-----------|
|               |               |             | X                       | Y         | Z         |
| 1             | 6             | 0           | 1.383075                | 0.594862  | 0.801994  |
| 2             | 6             | 0           | 2.467014                | 0.073735  | 0.691994  |
| 3             | 6             | 0           | -1.496116               | -1.042802 | 0.678994  |
| 4             | 6             | 0           | -2.687096               | -0.874663 | -0.032006 |
| 5             | 6             | 0           | -3.058211               | -1.852620 | -0.947006 |
| 6             | 6             | 0           | -0.679246               | -2.159897 | 0.483994  |
| 7             | 6             | 0           | -1.076359               | -3.122851 | -0.443006 |
| 8             | 6             | 0           | -2.266343               | -2.989712 | -1.173006 |
| 9             | 1             | 0           | -3.305995               | -0.002591 | 0.145994  |
| 10            | 1             | 0           | -0.449461               | -3.995924 | -0.596006 |
| 11            | 8             | 0           | -0.202042               | -0.410953 | 2.904994  |
| 12            | 16            | 0           | -0.986970               | 0.207139  | 1.844994  |
| 13            | 8             | 0           | -2.110866               | 1.101270  | 2.109994  |
| 14            | 6             | 0           | -0.227749               | 2.102050  | -0.092006 |
| 15            | 6             | 0           | 0.183229                | 1.912002  | -1.413006 |
| 16            | 6             | 0           | -1.024621               | 3.194143  | 0.262994  |
| 17            | 6             | 0           | -0.211664               | 2.826048  | -2.388006 |
| 18            | 1             | 0           | 0.826131                | 1.072927  | -1.664006 |
| 19            | 6             | 0           | -1.429517               | 4.089190  | -0.726006 |
| 20            | 1             | 0           | -1.319605               | 3.330177  | 1.295994  |
| 21            | 6             | 0           | -1.024538               | 3.910143  | -2.051006 |
| 22            | 1             | 0           | 0.114320                | 2.686010  | -3.414006 |
| 23            | 1             | 0           | -2.049418               | 4.937263  | -0.455006 |
| 24            | 1             | 0           | -1.332455               | 4.617179  | -2.815006 |
| 25            | 7             | 0           | 0.196142                | 1.166000  | 0.921994  |
| 26            | 1             | 0           | 0.239739                | -2.281005 | 1.048994  |
| 27            | 6             | 0           | 3.547917                | -0.757391 | 0.238994  |
| 28            | 8             | 0           | 3.768786                | -1.886417 | 0.624994  |
| 29            | 8             | 0           | 4.311995                | -0.093480 | -0.663006 |
| 30            | 6             | 0           | 5.434908                | -0.839611 | -1.166006 |

|    |   |   |           |           |           |
|----|---|---|-----------|-----------|-----------|
| 31 | 1 | 0 | 5.105798  | -1.779573 | -1.615006 |
| 32 | 1 | 0 | 5.900983  | -0.197666 | -1.913006 |
| 33 | 1 | 0 | 6.140882  | -1.062694 | -0.361006 |
| 34 | 6 | 0 | -2.694465 | -4.033662 | -2.169006 |
| 35 | 1 | 0 | -3.666516 | -4.469549 | -1.894006 |
| 36 | 1 | 0 | -2.810415 | -3.601649 | -3.173006 |
| 37 | 1 | 0 | -1.968561 | -4.851747 | -2.237006 |
| 38 | 1 | 0 | -3.991197 | -1.734511 | -1.497006 |

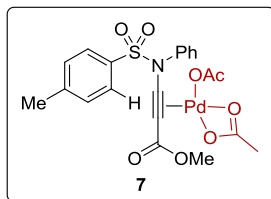

**Thermal correction to Gibbs Free Energy = 0.317658 Hartree**

**Electronic energy = - 1995.493381 Hartree**

| Center | Atomic | Atomic |           | Coordinates (Angstroms) |           |   |
|--------|--------|--------|-----------|-------------------------|-----------|---|
| Number | Number | Type   |           | X                       | Y         | Z |
| 1      | 6      | 0      | -2.558628 | 1.030949                | -0.984744 |   |
| 2      | 6      | 0      | -3.803569 | 0.919544                | -0.360132 |   |
| 3      | 6      | 0      | -4.194558 | 1.920848                | 0.525249  |   |
| 4      | 6      | 0      | -1.701043 | 2.110750                | -0.742913 |   |
| 5      | 6      | 0      | -2.118748 | 3.094889                | 0.147737  |   |
| 6      | 6      | 0      | -3.361316 | 3.015891                | 0.797324  |   |
| 7      | 46     | 0      | 1.603726  | 0.696712                | 0.492762  |   |
| 8      | 1      | 0      | -4.451638 | 0.078333                | -0.577849 |   |
| 9      | 1      | 0      | -1.465404 | 3.940048                | 0.344321  |   |
| 10     | 8      | 0      | -1.033676 | 0.244780                | -3.025013 |   |
| 11     | 16     | 0      | -2.038801 | -0.248973               | -2.095959 |   |
| 12     | 8      | 0      | -3.184892 | -1.053339               | -2.505569 |   |
| 13     | 6      | 0      | -1.749163 | -2.225327               | -0.026428 |   |
| 14     | 6      | 0      | -1.512515 | -2.062170               | 1.342596  |   |
| 15     | 6      | 0      | -2.623442 | -3.203097               | -0.508458 |   |
| 16     | 6      | 0      | -2.176338 | -2.898439               | 2.240226  |   |
| 17     | 1      | 0      | -0.797113 | -1.323037               | 1.692611  |   |
| 18     | 6      | 0      | -3.284622 | -4.022323               | 0.406333  |   |
| 19     | 1      | 0      | -2.778444 | -3.316141               | -1.573954 |   |
| 20     | 6      | 0      | -3.064818 | -3.871463               | 1.777141  |   |
| 21     | 1      | 0      | -1.995970 | -2.784751               | 3.304795  |   |

|    |   |   |           |           |           |
|----|---|---|-----------|-----------|-----------|
| 22 | 1 | 0 | -3.963918 | -4.786895 | 0.042508  |
| 23 | 1 | 0 | -3.579256 | -4.516859 | 2.482793  |
| 24 | 7 | 0 | -1.055344 | -1.365738 | -0.965794 |
| 25 | 1 | 0 | -0.738276 | 2.182242  | -1.237887 |
| 26 | 6 | 0 | 0.208513  | -1.146398 | -0.913271 |
| 27 | 6 | 0 | 1.443846  | -0.845471 | -0.820695 |
| 28 | 6 | 0 | 2.622331  | -1.476704 | -1.490019 |
| 29 | 8 | 0 | 2.654660  | -2.633499 | -1.843232 |
| 30 | 8 | 0 | 3.609821  | -0.589042 | -1.654962 |
| 31 | 6 | 0 | 4.811923  | -1.119691 | -2.241633 |
| 32 | 1 | 0 | 5.230393  | -1.894554 | -1.595461 |
| 33 | 1 | 0 | 4.603772  | -1.542531 | -3.227395 |
| 34 | 1 | 0 | 5.492739  | -0.273246 | -2.320322 |
| 35 | 8 | 0 | 1.750214  | 2.365753  | -0.769951 |
| 36 | 6 | 0 | 1.983851  | 3.135193  | 0.232571  |
| 37 | 8 | 0 | 1.950103  | 2.636796  | 1.400453  |
| 38 | 6 | 0 | 2.324845  | 4.581523  | 0.007993  |
| 39 | 1 | 0 | 2.070758  | 5.172680  | 0.889623  |
| 40 | 1 | 0 | 3.403278  | 4.665638  | -0.164706 |
| 41 | 1 | 0 | 1.811153  | 4.962037  | -0.877370 |
| 42 | 6 | 0 | -3.777389 | 4.082930  | 1.778725  |
| 43 | 1 | 0 | -4.839092 | 4.009937  | 2.027099  |
| 44 | 1 | 0 | -3.208507 | 3.992218  | 2.711656  |
| 45 | 1 | 0 | -3.586355 | 5.084594  | 1.380856  |
| 46 | 1 | 0 | -5.163581 | 1.851269  | 1.010870  |
| 47 | 8 | 0 | 1.384045  | -0.543252 | 2.053287  |
| 48 | 6 | 0 | 2.303188  | -1.475533 | 2.211014  |
| 49 | 8 | 0 | 3.220362  | -1.705299 | 1.430224  |
| 50 | 6 | 0 | 2.103378  | -2.275708 | 3.491946  |
| 51 | 1 | 0 | 1.159626  | -2.828218 | 3.439415  |
| 52 | 1 | 0 | 2.927954  | -2.977702 | 3.618673  |
| 53 | 1 | 0 | 2.045270  | -1.604432 | 4.353297  |

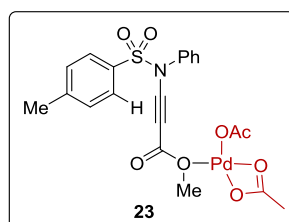

Thermal correction to Gibbs Free Energy = 0.318699 Hartree

Electronic energy = - 1995.18673069 Hartree

| Center<br>Number | Atomic<br>Number | Atomic<br>Type | Coordinates (Angstroms) |           |           |
|------------------|------------------|----------------|-------------------------|-----------|-----------|
|                  |                  |                | X                       | Y         | Z         |
| 1                | 6                | 0              | 2.050882                | 1.489119  | 0.920125  |
| 2                | 6                | 0              | 3.313858                | 2.087170  | 0.902125  |
| 3                | 6                | 0              | 3.436806                | 3.362175  | 0.356125  |
| 4                | 6                | 0              | 0.921856                | 2.130073  | 0.402125  |
| 5                | 6                | 0              | 1.074805                | 3.401079  | -0.144875 |
| 6                | 6                | 0              | 2.325779                | 4.037130  | -0.173875 |
| 7                | 46               | 0              | -2.819035               | -0.539079 | 0.191125  |
| 8                | 1                | 0              | 4.169879                | 1.568205  | 1.319125  |
| 9                | 1                | 0              | 0.192785                | 3.888044  | -0.550875 |
| 10               | 8                | 0              | 0.528957                | -0.341943 | 2.105125  |
| 11               | 16               | 0              | 1.878949                | -0.147888 | 1.589125  |
| 12               | 8                | 0              | 3.068963                | -0.489840 | 2.362125  |
| 13               | 6                | 0              | 3.254005                | -1.523832 | -0.424875 |
| 14               | 6                | 0              | 3.603983                | -0.996818 | -1.671875 |
| 15               | 6                | 0              | 4.131039                | -2.356796 | 0.275125  |
| 16               | 6                | 0              | 4.840996                | -1.316768 | -2.226875 |
| 17               | 1                | 0              | 2.905957                | -0.353846 | -2.198875 |
| 18               | 6                | 0              | 5.373051                | -2.656746 | -0.283875 |
| 19               | 1                | 0              | 3.839055                | -2.751808 | 1.240125  |
| 20               | 6                | 0              | 5.729030                | -2.142732 | -1.532875 |
| 21               | 1                | 0              | 5.112980                | -0.916757 | -3.198875 |
| 22               | 1                | 0              | 6.059077                | -3.302718 | 0.255125  |
| 23               | 1                | 0              | 6.694040                | -2.387692 | -1.966875 |
| 24               | 7                | 0              | 1.961992                | -1.214885 | 0.147125  |
| 25               | 1                | 0              | -0.061125               | 1.674033  | 0.412125  |
| 26               | 6                | 0              | 0.865998                | -1.356929 | -0.585875 |
| 27               | 6                | 0              | -0.123996               | -1.508969 | -1.281875 |
| 28               | 6                | 0              | -1.166985               | -1.774012 | -2.203875 |
| 29               | 8                | 0              | -1.067961               | -2.363008 | -3.254875 |
| 30               | 8                | 0              | -2.398006               | -1.253062 | -1.792875 |
| 31               | 6                | 0              | -3.508999               | -1.435107 | -2.717875 |
| 32               | 1                | 0              | -3.159006               | -1.249093 | -3.732875 |
| 33               | 1                | 0              | -3.884957               | -2.456122 | -2.631875 |
| 34               | 1                | 0              | -4.252029               | -0.703137 | -2.408875 |
| 35               | 8                | 0              | -2.082976               | -2.006049 | 1.472125  |

|    |   |   |           |           |           |
|----|---|---|-----------|-----------|-----------|
| 36 | 6 | 0 | -2.415005 | -1.279062 | 2.469125  |
| 37 | 8 | 0 | -3.037050 | -0.187088 | 2.203125  |
| 38 | 6 | 0 | -2.060990 | -1.651048 | 3.871125  |
| 39 | 1 | 0 | -1.033003 | -1.323006 | 4.052125  |
| 40 | 1 | 0 | -2.728010 | -1.154075 | 4.578125  |
| 41 | 1 | 0 | -2.104946 | -2.735050 | 3.992125  |
| 42 | 6 | 0 | 2.465722  | 5.429136  | -0.739875 |
| 43 | 1 | 0 | 3.496714  | 5.643178  | -1.032875 |
| 44 | 1 | 0 | 1.822717  | 5.569110  | -1.613875 |
| 45 | 1 | 0 | 2.170692  | 6.181124  | 0.002125  |
| 46 | 1 | 0 | 4.411787  | 3.841215  | 0.342125  |
| 47 | 8 | 0 | -3.821097 | 0.968880  | -0.669875 |
| 48 | 6 | 0 | -3.167142 | 2.093907  | -0.849875 |
| 49 | 8 | 0 | -1.973149 | 2.264956  | -0.610875 |
| 50 | 6 | 0 | -4.056188 | 3.209871  | -1.378875 |
| 51 | 1 | 0 | -3.440221 | 4.041896  | -1.722875 |
| 52 | 1 | 0 | -4.693173 | 2.849845  | -2.190875 |
| 53 | 1 | 0 | -4.713202 | 3.556844  | -0.574875 |

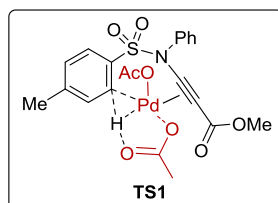

Thermal correction to Gibbs Free Energy = 0.313919 Hartree

Electronic energy = -1995.166717 Hartree

Frequency = -883.9

| Center Number | Atomic Number | Atomic Type | Coordinates (Angstroms) |           |           |
|---------------|---------------|-------------|-------------------------|-----------|-----------|
|               |               |             | X                       | Y         | Z         |
| 1             | 6             | 0           | 0.034310                | -2.372193 | -0.155039 |
| 2             | 6             | 0           | 0.488725                | -3.372219 | -1.008952 |
| 3             | 6             | 0           | 1.864643                | -3.601615 | -1.103144 |
| 4             | 6             | 0           | 0.902312                | -1.574091 | 0.628263  |
| 5             | 6             | 0           | 2.271054                | -1.865618 | 0.511622  |
| 6             | 6             | 0           | 2.775652                | -2.853245 | -0.352273 |
| 7             | 1             | 0           | -0.215122               | -3.966905 | -1.580220 |
| 8             | 1             | 0           | 2.971168                | -1.295443 | 1.117756  |
| 9             | 8             | 0           | -2.176571               | -1.885772 | 1.305389  |
| 10            | 16            | 0           | -1.742906               | -2.174599 | -0.055530 |

|    |   |   |           |           |           |
|----|---|---|-----------|-----------|-----------|
| 11 | 8 | 0 | -2.411436 | -3.182074 | -0.876129 |
| 12 | 6 | 0 | -3.241962 | 0.132941  | -0.679319 |
| 13 | 6 | 0 | -4.432239 | -0.507889 | -1.028691 |
| 14 | 6 | 0 | -3.237072 | 1.395291  | -0.079622 |
| 15 | 6 | 0 | -5.642783 | 0.133313  | -0.767872 |
| 16 | 1 | 0 | -4.404663 | -1.486236 | -1.495553 |
| 17 | 6 | 0 | -4.456096 | 2.028390  | 0.158403  |
| 18 | 1 | 0 | -2.298278 | 1.872091  | 0.186512  |
| 19 | 6 | 0 | -5.656888 | 1.399755  | -0.179810 |
| 20 | 1 | 0 | -6.574496 | -0.356067 | -1.033941 |
| 21 | 1 | 0 | -4.464087 | 3.011995  | 0.617630  |
| 22 | 1 | 0 | -6.602422 | 1.896755  | 0.014636  |
| 23 | 7 | 0 | -1.991618 | -0.540730 | -0.953297 |
| 24 | 1 | 0 | 0.555519  | -1.217994 | 1.816717  |
| 25 | 6 | 0 | -0.911501 | 0.096750  | -1.265036 |
| 26 | 6 | 0 | 0.251619  | 0.564839  | -1.415060 |
| 27 | 6 | 0 | 1.154100  | 1.071835  | -2.470760 |
| 28 | 8 | 0 | 0.870560  | 2.011905  | -3.177571 |
| 29 | 8 | 0 | 2.297817  | 0.378456  | -2.509206 |
| 30 | 6 | 0 | 3.330042  | 0.966317  | -3.328674 |
| 31 | 1 | 0 | 2.985757  | 1.084874  | -4.358160 |
| 32 | 1 | 0 | 3.604938  | 1.936465  | -2.909700 |
| 33 | 1 | 0 | 4.168054  | 0.272054  | -3.279786 |
| 34 | 8 | 0 | 1.236437  | 0.948618  | 2.612294  |
| 35 | 6 | 0 | 0.946460  | 0.044625  | 3.465384  |
| 36 | 8 | 0 | 0.497606  | -1.100835 | 3.175173  |
| 37 | 6 | 0 | 1.135160  | 0.403374  | 4.923917  |
| 38 | 1 | 0 | 0.219985  | 0.889109  | 5.278817  |
| 39 | 1 | 0 | 1.302575  | -0.495702 | 5.517990  |
| 40 | 1 | 0 | 1.959967  | 1.108181  | 5.037827  |
| 41 | 6 | 0 | 4.261465  | -3.087308 | -0.456767 |
| 42 | 1 | 0 | 4.698768  | -3.286641 | 0.527474  |
| 43 | 1 | 0 | 4.491866  | -3.933118 | -1.109216 |
| 44 | 1 | 0 | 4.764852  | -2.200929 | -0.858714 |
| 45 | 1 | 0 | 2.226018  | -4.381938 | -1.767003 |
| 46 | 8 | 0 | 2.564223  | 2.698961  | -0.398219 |
| 47 | 6 | 0 | 1.557592  | 3.278665  | 0.009238  |
| 48 | 8 | 0 | 0.495386  | 2.682465  | 0.498838  |
| 49 | 6 | 0 | 1.414580  | 4.793199  | -0.038096 |

|    |    |   |          |          |           |
|----|----|---|----------|----------|-----------|
| 50 | 1  | 0 | 2.385319 | 5.246642 | -0.242110 |
| 51 | 1  | 0 | 0.716829 | 5.062714 | -0.837598 |
| 52 | 1  | 0 | 1.007636 | 5.172730 | 0.902258  |
| 53 | 46 | 0 | 0.706096 | 0.669165 | 0.625328  |

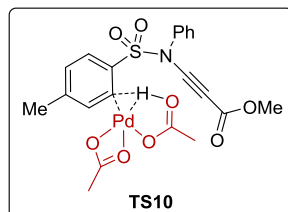

Thermal correction to Gibbs Free Energy = 0.317471 Hartree

Electronic energy = -1995.16857082 Hartree

Frequency = -648.6428

| Center Number | Atomic Number | Atomic Type | Coordinates (Angstroms) |           |           |
|---------------|---------------|-------------|-------------------------|-----------|-----------|
|               |               |             | X                       | Y         | Z         |
| 1             | 6             | 0           | -1.417717               | 1.498221  | -0.600982 |
| 2             | 6             | 0           | -2.716656               | 1.815470  | -0.207982 |
| 3             | 6             | 0           | -2.910486               | 2.707507  | 0.847018  |
| 4             | 6             | 0           | -0.286607               | 2.076005  | 0.020018  |
| 5             | 6             | 0           | -0.538429               | 3.007053  | 1.051018  |
| 6             | 6             | 0           | -1.829369               | 3.317300  | 1.497018  |
| 7             | 1             | 0           | -3.564738               | 1.389632  | -0.732982 |
| 8             | 1             | 0           | 0.309668                | 3.513891  | 1.504018  |
| 9             | 8             | 0           | 0.095084                | 0.457932  | -2.552982 |
| 10            | 16            | 0           | -1.243934               | 0.364188  | -1.985982 |
| 11            | 8             | 0           | -2.453914               | 0.468419  | -2.797982 |
| 12            | 6             | 0           | -2.565326               | -1.683559 | -0.646982 |
| 13            | 6             | 0           | -2.657346               | -1.791542 | 0.744018  |
| 14            | 6             | 0           | -3.648387               | -2.004352 | -1.469982 |
| 15            | 6             | 0           | -3.850432               | -2.238314 | 1.313018  |
| 16            | 1             | 0           | -1.804295               | -1.525705 | 1.360018  |
| 17            | 6             | 0           | -4.840469               | -2.434124 | -0.885982 |
| 18            | 1             | 0           | -3.550369               | -1.910371 | -2.543982 |
| 19            | 6             | 0           | -4.942492               | -2.556105 | 0.502018  |
| 20            | 1             | 0           | -3.927449               | -2.331299 | 2.392018  |
| 21            | 1             | 0           | -5.686517               | -2.684963 | -1.518982 |
| 22            | 1             | 0           | -5.869558               | -2.900928 | 0.950018  |
| 23            | 7             | 0           | -1.326242               | -1.244796 | -1.250982 |



|    |    |   |           |           |           |
|----|----|---|-----------|-----------|-----------|
| 24 | 1  | 0 | 0.678458  | 2.412820  | -0.716982 |
| 25 | 6  | 0 | -0.180360 | -1.863016 | -0.964982 |
| 26 | 6  | 0 | 0.852526  | -2.459213 | -0.721982 |
| 27 | 6  | 0 | 2.032396  | -3.140439 | -0.274982 |
| 28 | 8  | 0 | 2.042234  | -3.985441 | 0.606018  |
| 29 | 8  | 0 | 3.127475  | -2.728648 | -0.941982 |
| 30 | 6  | 0 | 4.368369  | -3.283885 | -0.473982 |
| 31 | 1  | 0 | 4.545424  | -2.992919 | 0.564018  |
| 32 | 1  | 0 | 4.354160  | -4.374883 | -0.545982 |
| 33 | 1  | 0 | 5.135449  | -2.865032 | -1.123982 |
| 34 | 8  | 0 | 2.838268  | 1.421407  | -0.508982 |
| 35 | 6  | 0 | 2.687448  | 2.363436  | -1.365982 |
| 36 | 8  | 0 | 1.630574  | 3.020638  | -1.528982 |
| 37 | 6  | 0 | 3.885504  | 2.653207  | -2.242982 |
| 38 | 1  | 0 | 3.810383  | 2.020221  | -3.133982 |
| 39 | 1  | 0 | 3.873703  | 3.696209  | -2.558982 |
| 40 | 1  | 0 | 4.813458  | 2.411030  | -1.723982 |
| 41 | 6  | 0 | -2.049186 | 4.275342  | 2.642018  |
| 42 | 1  | 0 | -2.983079 | 4.833521  | 2.524018  |
| 43 | 1  | 0 | -2.109290 | 3.733353  | 3.594018  |
| 44 | 1  | 0 | -1.229049 | 4.993185  | 2.725018  |
| 45 | 1  | 0 | -3.925439 | 2.950701  | 1.152018  |
| 46 | 8  | 0 | 0.250939  | -0.302098 | 2.095018  |
| 47 | 6  | 0 | 1.299809  | -0.978299 | 2.405018  |
| 48 | 8  | 0 | 2.388869  | -0.668507 | 1.815018  |
| 49 | 6  | 0 | 1.240592  | -2.115287 | 3.374018  |
| 50 | 1  | 0 | 2.107598  | -2.081453 | 4.038018  |
| 51 | 1  | 0 | 0.314598  | -2.082110 | 3.951018  |
| 52 | 1  | 0 | 1.290414  | -3.048297 | 2.800018  |
| 53 | 46 | 0 | 1.340143  | 0.766694  | 0.671018  |

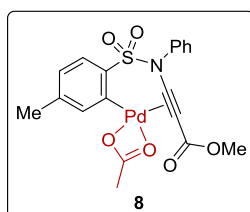

Thermal correction to Gibbs Free Energy = 0.264076 Hartree

Electronic energy = -1766.13116627 Hartree

Center    Atomic    Atomic    Coordinates (Angstroms)

| Number | Number | Type | X         | Y         | Z         |
|--------|--------|------|-----------|-----------|-----------|
| 1      | 6      | 0    | -0.494751 | 2.093032  | 0.009408  |
| 2      | 6      | 0    | -0.991885 | 3.268610  | 0.578096  |
| 3      | 6      | 0    | -0.306094 | 3.827812  | 1.652230  |
| 4      | 6      | 0    | 0.657774  | 1.459869  | 0.484274  |
| 5      | 6      | 0    | 1.323297  | 2.040951  | 1.566120  |
| 6      | 6      | 0    | 0.854504  | 3.225003  | 2.160223  |
| 7      | 46     | 0    | 1.429846  | -0.159089 | -0.398141 |
| 8      | 1      | 0    | -1.889165 | 3.727674  | 0.177614  |
| 9      | 1      | 0    | 2.226713  | 1.577084  | 1.950973  |
| 10     | 8      | 0    | -0.460523 | 1.254022  | -2.537256 |
| 11     | 16     | 0    | -1.355710 | 1.402703  | -1.393865 |
| 12     | 8      | 0    | -2.674660 | 2.009660  | -1.531700 |
| 13     | 6      | 0    | -2.975920 | -0.660454 | -0.373926 |
| 14     | 6      | 0    | -4.005829 | -0.680719 | -1.317930 |
| 15     | 6      | 0    | -3.211028 | -1.028748 | 0.953716  |
| 16     | 6      | 0    | -5.286321 | -1.062152 | -0.919845 |
| 17     | 1      | 0    | -3.802269 | -0.400176 | -2.344543 |
| 18     | 6      | 0    | -4.492086 | -1.425995 | 1.334492  |
| 19     | 1      | 0    | -2.398834 | -1.023591 | 1.672596  |
| 20     | 6      | 0    | -5.532005 | -1.438120 | 0.402675  |
| 21     | 1      | 0    | -6.089830 | -1.075973 | -1.649927 |
| 22     | 1      | 0    | -4.676478 | -1.723360 | 2.362731  |
| 23     | 1      | 0    | -6.528805 | -1.744493 | 0.703600  |
| 24     | 7      | 0    | -1.652076 | -0.271947 | -0.800286 |
| 25     | 6      | 0    | -0.573879 | -0.887729 | -0.310616 |
| 26     | 6      | 0    | 0.136746  | -1.682087 | 0.363192  |
| 27     | 6      | 0    | 0.474715  | -2.846516 | 1.153028  |
| 28     | 8      | 0    | -0.345822 | -3.696330 | 1.439795  |
| 29     | 8      | 0    | 1.763734  | -2.856554 | 1.536714  |
| 30     | 6      | 0    | 2.162387  | -4.009889 | 2.300390  |
| 31     | 1      | 0    | 2.008788  | -4.922467 | 1.720596  |
| 32     | 1      | 0    | 3.219899  | -3.862602 | 2.511814  |
| 33     | 1      | 0    | 1.587799  | -4.073281 | 3.228286  |
| 34     | 8      | 0    | 3.299348  | 0.636639  | -0.935650 |
| 35     | 6      | 0    | 3.657560  | -0.465020 | -1.501750 |
| 36     | 8      | 0    | 2.880692  | -1.463912 | -1.447882 |
| 37     | 6      | 0    | 4.968572  | -0.523242 | -2.232938 |

|    |   |   |           |           |           |
|----|---|---|-----------|-----------|-----------|
| 38 | 1 | 0 | 4.856498  | -0.026302 | -3.201730 |
| 39 | 1 | 0 | 5.736601  | 0.012012  | -1.670493 |
| 40 | 1 | 0 | 5.265523  | -1.559907 | -2.397810 |
| 41 | 6 | 0 | 1.576476  | 3.819667  | 3.345669  |
| 42 | 1 | 0 | 1.431962  | 4.902176  | 3.398846  |
| 43 | 1 | 0 | 1.203491  | 3.392390  | 4.284433  |
| 44 | 1 | 0 | 2.650026  | 3.618717  | 3.299878  |
| 45 | 1 | 0 | -0.674491 | 4.746713  | 2.100233  |

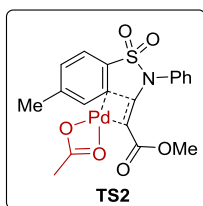

Thermal correction to Gibbs Free Energy = 0.264425 Hartree

Electronic energy = -1766.10806708 Hartree

Frequency = -295.0891

| Center Number | Atomic Number | Atomic Type | Coordinates (Angstroms) |           |           |
|---------------|---------------|-------------|-------------------------|-----------|-----------|
|               |               |             | X                       | Y         | Z         |
| 1             | 6             | 0           | 0.440075                | 2.371187  | -0.087505 |
| 2             | 6             | 0           | 0.872794                | 3.650874  | 0.245060  |
| 3             | 6             | 0           | 1.944212                | 3.778938  | 1.126685  |
| 4             | 6             | 0           | 1.011795                | 1.220154  | 0.457281  |
| 5             | 6             | 0           | 2.009083                | 1.381349  | 1.433114  |
| 6             | 6             | 0           | 2.515842                | 2.652839  | 1.740863  |
| 7             | 46            | 0           | 1.291333                | -0.670560 | -0.369726 |
| 8             | 1             | 0           | 0.358245                | 4.520123  | -0.150800 |
| 9             | 1             | 0           | 2.415160                | 0.512196  | 1.942529  |
| 10            | 8             | 0           | -0.916332               | 1.556549  | -2.286069 |
| 11            | 16            | 0           | -1.089434               | 2.118339  | -0.946989 |
| 12            | 8             | 0           | -1.996488               | 3.243327  | -0.735501 |
| 13            | 6             | 0           | -2.900709               | 0.255929  | -0.086212 |
| 14            | 6             | 0           | -3.074441               | -0.884716 | -0.875597 |
| 15            | 6             | 0           | -3.994711               | 0.929123  | 0.461576  |
| 16            | 6             | 0           | -4.364324               | -1.362252 | -1.100442 |
| 17            | 1             | 0           | -2.213604               | -1.386940 | -1.301728 |
| 18            | 6             | 0           | -5.281561               | 0.446825  | 0.219668  |
| 19            | 1             | 0           | -3.828204               | 1.815684  | 1.062997  |
| 20            | 6             | 0           | -5.466390               | -0.698947 | -0.555841 |

|    |   |   |           |           |           |
|----|---|---|-----------|-----------|-----------|
| 21 | 1 | 0 | -4.507821 | -2.250901 | -1.707799 |
| 22 | 1 | 0 | -6.136256 | 0.965062  | 0.642071  |
| 23 | 1 | 0 | -6.468651 | -1.075404 | -0.735905 |
| 24 | 7 | 0 | -1.586317 | 0.807019  | 0.155870  |
| 25 | 6 | 0 | -0.558207 | -0.003923 | 0.531802  |
| 26 | 6 | 0 | -0.209129 | -1.184966 | 0.930163  |
| 27 | 6 | 0 | -0.600479 | -2.338273 | 1.720861  |
| 28 | 8 | 0 | -1.695587 | -2.455754 | 2.240477  |
| 29 | 8 | 0 | 0.385012  | -3.253399 | 1.804972  |
| 30 | 6 | 0 | 0.056609  | -4.437506 | 2.550458  |
| 31 | 1 | 0 | -0.788619 | -4.956900 | 2.090825  |
| 32 | 1 | 0 | 0.950895  | -5.058074 | 2.517699  |
| 33 | 1 | 0 | -0.201656 | -4.184346 | 3.581389  |
| 34 | 8 | 0 | 2.866228  | -0.449032 | -1.847829 |
| 35 | 6 | 0 | 2.918718  | -1.716884 | -1.961126 |
| 36 | 8 | 0 | 2.171936  | -2.437693 | -1.213286 |
| 37 | 6 | 0 | 3.815898  | -2.360239 | -2.982349 |
| 38 | 1 | 0 | 3.270122  | -2.443396 | -3.929063 |
| 39 | 1 | 0 | 4.699494  | -1.742427 | -3.152119 |
| 40 | 1 | 0 | 4.101687  | -3.363581 | -2.660532 |
| 41 | 6 | 0 | 3.659067  | 2.803932  | 2.714159  |
| 42 | 1 | 0 | 4.619340  | 2.810607  | 2.184266  |
| 43 | 1 | 0 | 3.587135  | 3.741013  | 3.273342  |
| 44 | 1 | 0 | 3.686617  | 1.977563  | 3.429654  |
| 45 | 1 | 0 | 2.306970  | 4.770295  | 1.383508  |

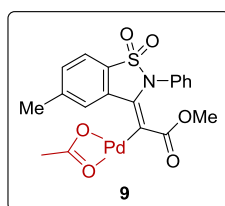

Thermal correction to Gibbs Free Energy = 0.268663 Hartree

Electronic energy = -1766.16566003 Hartree

| Center Number | Atomic Number | Atomic Type | Coordinates (Angstroms) |          |           |
|---------------|---------------|-------------|-------------------------|----------|-----------|
|               |               |             | X                       | Y        | Z         |
| -----         |               |             |                         |          |           |
| 1             | 6             | 0           | 1.306060                | 2.727472 | -0.077009 |
| 2             | 6             | 0           | 1.147991                | 4.106791 | -0.058142 |
| 3             | 6             | 0           | -0.150294               | 4.609661 | -0.102566 |
| 4             | 6             | 0           | 0.231902                | 1.838145 | -0.154981 |

|    |    |   |           |           |           |
|----|----|---|-----------|-----------|-----------|
| 5  | 6  | 0 | -1.060956 | 2.365828  | -0.227207 |
| 6  | 6  | 0 | -1.260923 | 3.751164  | -0.189277 |
| 7  | 46 | 0 | -2.118123 | -1.160572 | -0.036087 |
| 8  | 1  | 0 | 2.006757  | 4.768171  | -0.006701 |
| 9  | 1  | 0 | -1.915647 | 1.707380  | -0.295846 |
| 10 | 8  | 0 | 3.512006  | 1.932424  | 1.244354  |
| 11 | 16 | 0 | 2.849021  | 1.867332  | -0.058809 |
| 12 | 8  | 0 | 3.630974  | 2.126752  | -1.267979 |
| 13 | 6  | 0 | 2.801921  | -0.805434 | 0.246454  |
| 14 | 6  | 0 | 2.545492  | -1.386014 | 1.493167  |
| 15 | 6  | 0 | 3.854456  | -1.263653 | -0.550293 |
| 16 | 6  | 0 | 3.332038  | -2.451254 | 1.927057  |
| 17 | 1  | 0 | 1.741660  | -1.000818 | 2.112208  |
| 18 | 6  | 0 | 4.649910  | -2.315977 | -0.096914 |
| 19 | 1  | 0 | 4.030834  | -0.799403 | -1.514095 |
| 20 | 6  | 0 | 4.386892  | -2.915004 | 1.135790  |
| 21 | 1  | 0 | 3.135236  | -2.904577 | 2.893928  |
| 22 | 1  | 0 | 5.468763  | -2.672762 | -0.713889 |
| 23 | 1  | 0 | 5.002926  | -3.739881 | 1.482265  |
| 24 | 7  | 0 | 2.036521  | 0.321237  | -0.201896 |
| 25 | 6  | 0 | 0.639730  | 0.416341  | -0.232658 |
| 26 | 6  | 0 | -0.192737 | -0.660248 | -0.365448 |
| 27 | 6  | 0 | 0.214896  | -1.958785 | -0.873594 |
| 28 | 8  | 0 | 1.093130  | -2.385104 | -1.573123 |
| 29 | 8  | 0 | -0.892413 | -2.806568 | -0.487882 |
| 30 | 6  | 0 | -1.144199 | -3.986682 | -1.283953 |
| 31 | 1  | 0 | -0.250464 | -4.611842 | -1.269684 |
| 32 | 1  | 0 | -1.982575 | -4.494745 | -0.809090 |
| 33 | 1  | 0 | -1.390585 | -3.706122 | -2.310836 |
| 34 | 8  | 0 | -4.214683 | -1.608067 | 0.387300  |
| 35 | 6  | 0 | -4.389190 | -0.374397 | 0.605545  |
| 36 | 8  | 0 | -3.379458 | 0.417356  | 0.470842  |
| 37 | 6  | 0 | -5.715350 | 0.186057  | 1.030184  |
| 38 | 1  | 0 | -5.980205 | 1.037737  | 0.397877  |
| 39 | 1  | 0 | -6.486635 | -0.582496 | 0.968941  |
| 40 | 1  | 0 | -5.641692 | 0.548815  | 2.060379  |
| 41 | 6  | 0 | -2.659059 | 4.317515  | -0.264049 |
| 42 | 1  | 0 | -2.794796 | 5.137333  | 0.447654  |
| 43 | 1  | 0 | -2.865494 | 4.717620  | -1.263992 |

|    |   |   |           |          |           |
|----|---|---|-----------|----------|-----------|
| 44 | 1 | 0 | -3.405445 | 3.548249 | -0.051116 |
| 45 | 1 | 0 | -0.306870 | 5.684175 | -0.074485 |

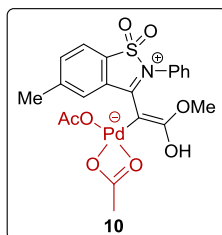

Thermal correction to Gibbs Free Energy = 0.325937 Hartree

Electronic energy = -1995.233304 Hartree

| Center Number | Atomic Number | Atomic Type | Coordinates (Angstroms) |           |           |
|---------------|---------------|-------------|-------------------------|-----------|-----------|
|               |               |             | X                       | Y         | Z         |
| 1             | 6             | 0           | -0.380517               | -0.540924 | -0.642359 |
| 2             | 6             | 0           | 0.701341                | 0.336743  | -0.492069 |
| 3             | 8             | 0           | -3.429118               | -1.332121 | -1.033428 |
| 4             | 6             | 0           | -4.472958               | -1.120888 | -0.279522 |
| 5             | 8             | 0           | -4.360819               | -0.356255 | 0.705913  |
| 6             | 6             | 0           | -5.766844               | -1.792391 | -0.644408 |
| 7             | 1             | 0           | -6.547207               | -1.520660 | 0.066564  |
| 8             | 1             | 0           | -6.061634               | -1.495537 | -1.655419 |
| 9             | 1             | 0           | -5.628669               | -2.877949 | -0.648602 |
| 10            | 46            | 0           | -2.180280               | -0.174070 | 0.204257  |
| 11            | 6             | 0           | 0.572342                | 1.812787  | -0.555742 |
| 12            | 6             | 0           | 1.781981                | 2.496989  | -0.423690 |
| 13            | 6             | 0           | -0.577484               | 2.552786  | -0.843025 |
| 14            | 6             | 0           | 1.894553                | 3.874414  | -0.552749 |
| 15            | 6             | 0           | -0.513792               | 3.946655  | -0.952125 |
| 16            | 1             | 0           | -1.525097               | 2.037421  | -0.961525 |
| 17            | 6             | 0           | 0.726562                | 4.592895  | -0.806037 |
| 18            | 1             | 0           | 2.853941                | 4.372641  | -0.462786 |
| 19            | 1             | 0           | 0.778288                | 5.673765  | -0.901529 |
| 20            | 16            | 0           | 3.115767                | 1.371575  | -0.165682 |
| 21            | 8             | 0           | 4.047615                | 1.366862  | -1.293285 |
| 22            | 8             | 0           | 3.634101                | 1.397369  | 1.199554  |
| 23            | 6             | 0           | 2.545064                | -1.266901 | 0.156860  |
| 24            | 6             | 0           | 3.666363                | -1.794649 | -0.492636 |
| 25            | 6             | 0           | 1.990462                | -1.900277 | 1.274237  |
| 26            | 6             | 0           | 4.236512                | -2.976362 | -0.019631 |

|    |   |   |           |           |           |
|----|---|---|-----------|-----------|-----------|
| 27 | 1 | 0 | 4.079506  | -1.281315 | -1.353796 |
| 28 | 6 | 0 | 2.562705  | -3.091159 | 1.721281  |
| 29 | 1 | 0 | 1.126082  | -1.484342 | 1.784556  |
| 30 | 6 | 0 | 3.682494  | -3.630105 | 1.082470  |
| 31 | 1 | 0 | 5.111578  | -3.384823 | -0.516274 |
| 32 | 1 | 0 | 2.135146  | -3.587300 | 2.587262  |
| 33 | 1 | 0 | 4.125307  | -4.552463 | 1.446886  |
| 34 | 7 | 0 | 2.013928  | -0.016780 | -0.310433 |
| 35 | 6 | 0 | -0.244764 | -1.767520 | -1.307013 |
| 36 | 8 | 0 | -1.214940 | -2.640354 | -1.477802 |
| 37 | 8 | 0 | 0.885895  | -2.094366 | -1.917022 |
| 38 | 6 | 0 | 0.955675  | -3.329057 | -2.656997 |
| 39 | 1 | 0 | 0.240338  | -3.321438 | -3.482124 |
| 40 | 1 | 0 | 1.977171  | -3.370570 | -3.031682 |
| 41 | 1 | 0 | 0.755006  | -4.179639 | -2.002862 |
| 42 | 6 | 0 | -1.770243 | 4.745625  | -1.199484 |
| 43 | 1 | 0 | -2.484678 | 4.185962  | -1.809496 |
| 44 | 1 | 0 | -2.267576 | 4.981998  | -0.251099 |
| 45 | 1 | 0 | -1.552738 | 5.691305  | -1.703707 |
| 46 | 1 | 0 | -2.098390 | -2.276489 | -1.197614 |
| 47 | 8 | 0 | -0.742714 | -0.884630 | 2.764831  |
| 48 | 6 | 0 | -0.852414 | 0.338273  | 2.668123  |
| 49 | 8 | 0 | -1.337319 | 0.975608  | 1.628578  |
| 50 | 6 | 0 | -0.372515 | 1.277297  | 3.767357  |
| 51 | 1 | 0 | 0.609993  | 1.677534  | 3.492988  |
| 52 | 1 | 0 | -1.055454 | 2.121269  | 3.887845  |
| 53 | 1 | 0 | -0.276552 | 0.727794  | 4.704775  |

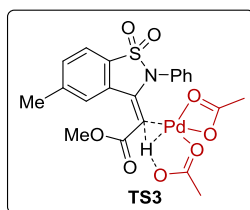

Thermal correction to Gibbs Free Energy = 0.318895 Hartree

Electronic energy = -1955.233926 Hartree

Frequencies: -1129.7

| Center | Atomic | Atomic | Coordinates (Angstroms) |   |   |
|--------|--------|--------|-------------------------|---|---|
| Number | Number | Type   | X                       | Y | Z |

-----

|    |    |   |           |           |           |
|----|----|---|-----------|-----------|-----------|
| 1  | 6  | 0 | 0.009990  | -0.803348 | -0.778371 |
| 2  | 6  | 0 | -0.988826 | 0.142942  | -0.509585 |
| 3  | 1  | 0 | 0.986569  | -0.405329 | -1.626969 |
| 4  | 8  | 0 | 3.097010  | -0.768272 | -0.574991 |
| 5  | 6  | 0 | 3.021261  | -0.488643 | -1.808094 |
| 6  | 8  | 0 | 1.937268  | -0.265776 | -2.438007 |
| 7  | 6  | 0 | 4.315545  | -0.381591 | -2.580842 |
| 8  | 1  | 0 | 4.193908  | -0.815326 | -3.575369 |
| 9  | 1  | 0 | 4.556624  | 0.679408  | -2.704170 |
| 10 | 1  | 0 | 5.126707  | -0.869673 | -2.040788 |
| 11 | 8  | 0 | 0.261447  | -1.085041 | 2.352519  |
| 12 | 6  | 0 | 1.264097  | -1.234068 | 3.146939  |
| 13 | 8  | 0 | 2.434213  | -1.176261 | 2.660487  |
| 14 | 6  | 0 | 1.026015  | -1.497918 | 4.606449  |
| 15 | 1  | 0 | 0.175738  | -0.911662 | 4.962268  |
| 16 | 1  | 0 | 0.785301  | -2.557757 | 4.742769  |
| 17 | 1  | 0 | 1.922573  | -1.264562 | 5.182717  |
| 18 | 46 | 0 | 1.504676  | -0.895960 | 0.706867  |
| 19 | 6  | 0 | -2.469049 | -0.036346 | -0.381821 |
| 20 | 6  | 0 | -3.151806 | 1.147640  | -0.074549 |
| 21 | 6  | 0 | -3.222580 | -1.214290 | -0.439044 |
| 22 | 6  | 0 | -4.518632 | 1.213936  | 0.147975  |
| 23 | 6  | 0 | -4.607474 | -1.190015 | -0.222731 |
| 24 | 1  | 0 | -2.747767 | -2.152835 | -0.679450 |
| 25 | 6  | 0 | -5.245218 | 0.027808  | 0.058044  |
| 26 | 1  | 0 | -5.002366 | 2.155082  | 0.387108  |
| 27 | 1  | 0 | -6.319812 | 0.046320  | 0.215807  |
| 28 | 16 | 0 | -2.042571 | 2.508440  | 0.072739  |
| 29 | 8  | 0 | -2.149842 | 3.458689  | -1.033139 |
| 30 | 8  | 0 | -1.966660 | 3.011693  | 1.443260  |
| 31 | 6  | 0 | 0.599041  | 2.107849  | -0.268050 |
| 32 | 6  | 0 | 1.114095  | 2.563985  | -1.484236 |
| 33 | 6  | 0 | 1.253718  | 2.378790  | 0.939427  |
| 34 | 6  | 0 | 2.317693  | 3.269291  | -1.491572 |
| 35 | 1  | 0 | 0.574727  | 2.367985  | -2.403637 |
| 36 | 6  | 0 | 2.455299  | 3.086148  | 0.919970  |
| 37 | 1  | 0 | 0.812956  | 2.043001  | 1.870801  |
| 38 | 6  | 0 | 2.988293  | 3.526966  | -0.293519 |
| 39 | 1  | 0 | 2.721737  | 3.629154  | -2.432909 |



|    |   |   |           |           |           |
|----|---|---|-----------|-----------|-----------|
| 40 | 1 | 0 | 2.970485  | 3.294900  | 1.852158  |
| 41 | 1 | 0 | 3.921679  | 4.082209  | -0.304268 |
| 42 | 7 | 0 | -0.677786 | 1.455336  | -0.233368 |
| 43 | 6 | 0 | -0.327603 | -2.125367 | -1.369111 |
| 44 | 8 | 0 | -1.221108 | -2.367671 | -2.165517 |
| 45 | 8 | 0 | 0.586507  | -3.067381 | -1.021665 |
| 46 | 6 | 0 | 0.440624  | -4.339591 | -1.672125 |
| 47 | 1 | 0 | 0.495869  | -4.225469 | -2.757659 |
| 48 | 1 | 0 | 1.265874  | -4.949830 | -1.305982 |
| 49 | 1 | 0 | -0.517498 | -4.798353 | -1.414837 |
| 50 | 6 | 0 | -5.397451 | -2.476161 | -0.272263 |
| 51 | 1 | 0 | -6.444683 | -2.292755 | -0.527870 |
| 52 | 1 | 0 | -4.980906 | -3.169425 | -1.008028 |
| 53 | 1 | 0 | -5.380081 | -2.981244 | 0.701253  |

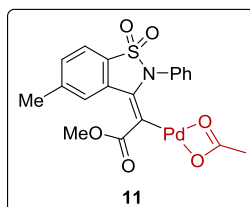

Thermal correction to Gibbs Free Energy = 0.268213 Hartree

Electronic energy = -1766.17974491 Hartree

| Center Number | Atomic Number | Atomic Type | Coordinates (Angstroms) |           |           |
|---------------|---------------|-------------|-------------------------|-----------|-----------|
|               |               |             | X                       | Y         | Z         |
| 1             | 6             | 0           | 3.214091                | -0.900988 | -0.196284 |
| 2             | 6             | 0           | 4.599902                | -1.004364 | -0.247890 |
| 3             | 6             | 0           | 5.339603                | 0.171072  | -0.162543 |
| 4             | 6             | 0           | 2.540535                | 0.319681  | -0.063220 |
| 5             | 6             | 0           | 3.309836                | 1.487235  | 0.029035  |
| 6             | 6             | 0           | 4.706090                | 1.420204  | -0.022522 |
| 7             | 46            | 0           | -1.797844               | 0.222359  | 0.016406  |
| 8             | 1             | 0           | 5.084453                | -1.969603 | -0.352905 |
| 9             | 1             | 0           | 2.825850                | 2.444756  | 0.167548  |
| 10            | 8             | 0           | 2.041953                | -2.988163 | 1.045260  |
| 11            | 16            | 0           | 2.090584                | -2.271694 | -0.234948 |
| 12            | 8             | 0           | 2.191206                | -3.055373 | -1.467664 |
| 13            | 6             | 0           | -0.549961               | -1.687725 | -0.003439 |
| 14            | 6             | 0           | -1.042380               | -1.564619 | 1.331838  |

|    |   |   |           |           |           |
|----|---|---|-----------|-----------|-----------|
| 15 | 6 | 0 | -1.199584 | -2.565189 | -0.913376 |
| 16 | 6 | 0 | -2.180779 | -2.305832 | 1.718502  |
| 17 | 1 | 0 | -0.446392 | -1.048410 | 2.074773  |
| 18 | 6 | 0 | -2.319297 | -3.268520 | -0.505223 |
| 19 | 1 | 0 | -0.782724 | -2.676811 | -1.907186 |
| 20 | 6 | 0 | -2.809421 | -3.141150 | 0.809744  |
| 21 | 1 | 0 | -2.539197 | -2.230109 | 2.740131  |
| 22 | 1 | 0 | -2.818078 | -3.932988 | -1.203121 |
| 23 | 1 | 0 | -3.681600 | -3.712136 | 1.113847  |
| 24 | 7 | 0 | 0.746141  | -1.188415 | -0.351397 |
| 25 | 6 | 0 | 1.070728  | 0.161376  | -0.054495 |
| 26 | 6 | 0 | 0.038379  | 1.023165  | 0.107308  |
| 27 | 6 | 0 | 0.189480  | 2.464215  | 0.404853  |
| 28 | 8 | 0 | 0.899514  | 2.936608  | 1.280073  |
| 29 | 8 | 0 | -0.573270 | 3.222990  | -0.404176 |
| 30 | 6 | 0 | -0.570655 | 4.630790  | -0.123697 |
| 31 | 1 | 0 | 0.429408  | 5.051334  | -0.259330 |
| 32 | 1 | 0 | -1.270848 | 5.069594  | -0.833234 |
| 33 | 1 | 0 | -0.895916 | 4.818152  | 0.903065  |
| 34 | 8 | 0 | -3.943729 | -0.170714 | -0.196283 |
| 35 | 6 | 0 | -4.116000 | 1.069867  | -0.406998 |
| 36 | 8 | 0 | -3.093849 | 1.845586  | -0.387362 |
| 37 | 6 | 0 | -5.475469 | 1.640346  | -0.698021 |
| 38 | 1 | 0 | -5.530357 | 1.914171  | -1.757445 |
| 39 | 1 | 0 | -6.251160 | 0.905906  | -0.476618 |
| 40 | 1 | 0 | -5.632533 | 2.549357  | -0.112980 |
| 41 | 6 | 0 | 5.533731  | 2.680240  | 0.059609  |
| 42 | 1 | 0 | 6.364092  | 2.564642  | 0.764585  |
| 43 | 1 | 0 | 5.970451  | 2.927068  | -0.915762 |
| 44 | 1 | 0 | 4.931740  | 3.532970  | 0.381085  |
| 45 | 1 | 0 | 6.423709  | 0.123279  | -0.200039 |

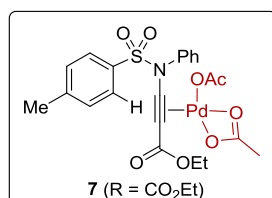

**Thermal correction to Gibbs Free Energy = 0.343787 Hartree**

**Electronic energy = -2034.505010 Hartree**

Standard orientation:

| Center | Atomic | Atomic | Coordinates (Angstroms) |           |           |
|--------|--------|--------|-------------------------|-----------|-----------|
| Number | Number | Type   | X                       | Y         | Z         |
| 1      | 6      | 0      | -2.637399               | 1.051934  | -1.126293 |
| 2      | 6      | 0      | -3.929036               | 0.950132  | -0.603149 |
| 3      | 6      | 0      | -4.379696               | 1.951396  | 0.253459  |
| 4      | 6      | 0      | -1.791476               | 2.122038  | -0.811438 |
| 5      | 6      | 0      | -2.269299               | 3.106358  | 0.048285  |
| 6      | 6      | 0      | -3.560327               | 3.036896  | 0.596543  |
| 7      | 46     | 0      | 1.396327                | 0.677409  | 0.667259  |
| 8      | 1      | 0      | -4.565551               | 0.116175  | -0.875902 |
| 9      | 1      | 0      | -1.625558               | 3.944012  | 0.300726  |
| 10     | 8      | 0      | -0.964538               | 0.259894  | -3.044672 |
| 11     | 16     | 0      | -2.043119               | -0.228543 | -2.198905 |
| 12     | 8      | 0      | -3.160696               | -1.020949 | -2.700408 |
| 13     | 6      | 0      | -1.932352               | -2.212142 | -0.119302 |
| 14     | 6      | 0      | -1.797167               | -2.056163 | 1.264270  |
| 15     | 6      | 0      | -2.778064               | -3.179006 | -0.669490 |
| 16     | 6      | 0      | -2.534880               | -2.888424 | 2.106198  |
| 17     | 1      | 0      | -1.102125               | -1.326044 | 1.669926  |
| 18     | 6      | 0      | -3.514320               | -3.994231 | 0.189869  |
| 19     | 1      | 0      | -2.853841               | -3.286968 | -1.744046 |
| 20     | 6      | 0      | -3.396201               | -3.850400 | 1.573899  |
| 21     | 1      | 0      | -2.433459               | -2.780308 | 3.181743  |
| 22     | 1      | 0      | -4.172262               | -4.750385 | -0.226950 |
| 23     | 1      | 0      | -3.968607               | -4.492744 | 2.236380  |
| 24     | 7      | 0      | -1.160574               | -1.357173 | -1.000248 |
| 25     | 1      | 0      | -0.791665               | 2.186004  | -1.227773 |
| 26     | 6      | 0      | 0.097275                | -1.148724 | -0.848499 |
| 27     | 6      | 0      | 1.324537                | -0.861023 | -0.658499 |
| 28     | 6      | 0      | 2.546262                | -1.503589 | -1.236579 |
| 29     | 8      | 0      | 2.589073                | -2.661215 | -1.587867 |
| 30     | 8      | 0      | 3.552152                | -0.628169 | -1.320134 |
| 31     | 6      | 0      | 4.806669                | -1.163008 | -1.810784 |
| 32     | 1      | 0      | 5.100249                | -1.992754 | -1.161458 |
| 33     | 1      | 0      | 4.647752                | -1.560847 | -2.818065 |
| 34     | 8      | 0      | 1.654840                | 2.347654  | -0.576559 |
| 35     | 6      | 0      | 1.815884                | 3.113458  | 0.442857  |

|    |   |   |           |           |           |
|----|---|---|-----------|-----------|-----------|
| 36 | 8 | 0 | 1.688344  | 2.613521  | 1.603522  |
| 37 | 6 | 0 | 2.183495  | 4.557782  | 0.248607  |
| 38 | 1 | 0 | 1.865581  | 5.149294  | 1.109044  |
| 39 | 1 | 0 | 3.272656  | 4.634724  | 0.160661  |
| 40 | 1 | 0 | 1.742884  | 4.943387  | -0.673192 |
| 41 | 6 | 0 | -4.042976 | 4.103763  | 1.547180  |
| 42 | 1 | 0 | -5.121753 | 4.040301  | 1.709835  |
| 43 | 1 | 0 | -3.551136 | 4.003353  | 2.521974  |
| 44 | 1 | 0 | -3.811259 | 5.105192  | 1.170902  |
| 45 | 1 | 0 | -5.384878 | 1.889277  | 0.660193  |
| 46 | 8 | 0 | 1.044390  | -0.564422 | 2.202449  |
| 47 | 6 | 0 | 1.950511  | -1.493306 | 2.436882  |
| 48 | 8 | 0 | 2.933556  | -1.715627 | 1.738452  |
| 49 | 6 | 0 | 1.643592  | -2.298692 | 3.693127  |
| 50 | 1 | 0 | 0.707029  | -2.849808 | 3.559911  |
| 51 | 1 | 0 | 2.454261  | -3.001921 | 3.885683  |
| 52 | 1 | 0 | 1.514409  | -1.630700 | 4.549351  |
| 53 | 6 | 0 | 5.817234  | -0.033463 | -1.792135 |
| 54 | 1 | 0 | 6.783096  | -0.397481 | -2.156470 |
| 55 | 1 | 0 | 5.494394  | 0.791183  | -2.434126 |
| 56 | 1 | 0 | 5.952095  | 0.348145  | -0.776341 |

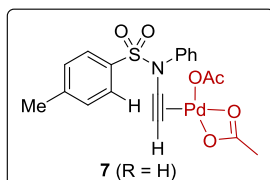

Thermal correction to Gibbs Free Energy = 0.281097 Hartree

Electronic energy = -1767.358795 Hartree

| Center Number | Atomic Number | Atomic Type | Coordinates (Angstroms) |           |           |
|---------------|---------------|-------------|-------------------------|-----------|-----------|
|               |               |             | X                       | Y         | Z         |
| 1             | 6             | 0           | -1.472988               | 2.131217  | -0.395385 |
| 2             | 6             | 0           | -2.424403               | 2.490510  | 0.562586  |
| 3             | 6             | 0           | -2.013664               | 3.249316  | 1.655851  |
| 4             | 6             | 0           | -0.129227               | 2.507474  | -0.282823 |
| 5             | 6             | 0           | 0.251566                | 3.264231  | 0.821046  |
| 6             | 6             | 0           | -0.675583               | 3.641958  | 1.805838  |
| 7             | 46            | 0           | 2.016552                | -0.667096 | -0.223434 |
| 8             | 1             | 0           | -3.460393               | 2.195292  | 0.441541  |

|    |    |   |           |           |           |
|----|----|---|-----------|-----------|-----------|
| 9  | 1  | 0 | 1.290346  | 3.565714  | 0.920207  |
| 10 | 8  | 0 | -1.071187 | 1.321849  | -2.902620 |
| 11 | 16 | 0 | -1.980068 | 1.144858  | -1.779796 |
| 12 | 8  | 0 | -3.432907 | 1.180303  | -1.913687 |
| 13 | 6  | 0 | -2.469617 | -1.222433 | -0.228536 |
| 14 | 6  | 0 | -1.940889 | -1.626855 | 1.002165  |
| 15 | 6  | 0 | -3.810765 | -1.440976 | -0.555327 |
| 16 | 6  | 0 | -2.782470 | -2.256415 | 1.919149  |
| 17 | 1  | 0 | -0.886072 | -1.484614 | 1.221095  |
| 18 | 6  | 0 | -4.638147 | -2.063494 | 0.379266  |
| 19 | 1  | 0 | -4.193559 | -1.128078 | -1.518418 |
| 20 | 6  | 0 | -4.128706 | -2.469691 | 1.614309  |
| 21 | 1  | 0 | -2.380317 | -2.578227 | 2.874927  |
| 22 | 1  | 0 | -5.680903 | -2.239146 | 0.133712  |
| 23 | 1  | 0 | -4.777997 | -2.958139 | 2.334703  |
| 24 | 7  | 0 | -1.594022 | -0.578860 | -1.188338 |
| 25 | 1  | 0 | 0.597867  | 2.221709  | -1.035310 |
| 26 | 6  | 0 | -0.418848 | -1.020265 | -1.469871 |
| 27 | 6  | 0 | 0.785400  | -1.377444 | -1.663912 |
| 28 | 8  | 0 | 2.874628  | 0.997546  | -1.158763 |
| 29 | 6  | 0 | 3.672602  | 1.183348  | -0.166306 |
| 30 | 8  | 0 | 3.567708  | 0.426624  | 0.846274  |
| 31 | 6  | 0 | 4.724201  | 2.254733  | -0.240511 |
| 32 | 1  | 0 | 5.005761  | 2.579366  | 0.762759  |
| 33 | 1  | 0 | 5.612433  | 1.842781  | -0.731721 |
| 34 | 1  | 0 | 4.369759  | 3.097839  | -0.837256 |
| 35 | 6  | 0 | -0.230484 | 4.440107  | 3.005786  |
| 36 | 1  | 0 | -1.081827 | 4.845111  | 3.558471  |
| 37 | 1  | 0 | 0.347378  | 3.812395  | 3.694450  |
| 38 | 1  | 0 | 0.414727  | 5.273766  | 2.711025  |
| 39 | 1  | 0 | -2.745139 | 3.542895  | 2.403162  |
| 40 | 8  | 0 | 1.411352  | -2.073671 | 1.068627  |
| 41 | 6  | 0 | 1.579900  | -3.332217 | 0.712992  |
| 42 | 8  | 0 | 1.984645  | -3.713451 | -0.379872 |
| 43 | 6  | 0 | 1.197107  | -4.302749 | 1.824122  |
| 44 | 1  | 0 | 0.127543  | -4.215640 | 2.041127  |
| 45 | 1  | 0 | 1.423436  | -5.323406 | 1.514320  |
| 46 | 1  | 0 | 1.739558  | -4.060287 | 2.742190  |
| 47 | 1  | 0 | 1.231418  | -1.984365 | -2.440242 |

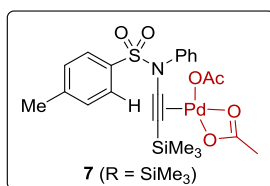

Thermal correction to Gibbs Free Energy = 0.374180 Hartree

Electronic energy = -2176.002677 Hartree

| Center Number | Atomic Number | Atomic Type | Coordinates (Angstroms) |           |           |
|---------------|---------------|-------------|-------------------------|-----------|-----------|
|               |               |             | X                       | Y         | Z         |
| 1             | 6             | 0           | -2.667700               | 0.869833  | -1.036359 |
| 2             | 6             | 0           | -3.907806               | 0.732615  | -0.408243 |
| 3             | 6             | 0           | -4.360387               | 1.768056  | 0.406309  |
| 4             | 6             | 0           | -1.875890               | 2.011398  | -0.866654 |
| 5             | 6             | 0           | -2.353027               | 3.029500  | -0.046401 |
| 6             | 6             | 0           | -3.592432               | 2.924495  | 0.605057  |
| 7             | 46            | 0           | 1.427922                | 0.892391  | 0.553640  |
| 8             | 1             | 0           | -4.506355               | -0.156557 | -0.570169 |
| 9             | 1             | 0           | -1.749197               | 3.921492  | 0.093815  |
| 10            | 8             | 0           | -1.091873               | 0.038502  | -3.014981 |
| 11            | 16            | 0           | -2.066467               | -0.456300 | -2.052519 |
| 12            | 8             | 0           | -3.171957               | -1.336175 | -2.419737 |
| 13            | 6             | 0           | -1.710072               | -2.297635 | 0.088998  |
| 14            | 6             | 0           | -1.544659               | -2.045056 | 1.455120  |
| 15            | 6             | 0           | -2.481739               | -3.371286 | -0.364945 |
| 16            | 6             | 0           | -2.169781               | -2.887609 | 2.374814  |
| 17            | 1             | 0           | -0.909765               | -1.228688 | 1.787883  |
| 18            | 6             | 0           | -3.108614               | -4.195200 | 0.569666  |
| 19            | 1             | 0           | -2.589048               | -3.549954 | -1.427428 |
| 20            | 6             | 0           | -2.955289               | -3.956097 | 1.936946  |
| 21            | 1             | 0           | -2.042294               | -2.702297 | 3.437109  |
| 22            | 1             | 0           | -3.709435               | -5.031218 | 0.225044  |
| 23            | 1             | 0           | -3.441820               | -4.604929 | 2.659165  |
| 24            | 7             | 0           | -1.052426               | -1.436424 | -0.872954 |
| 25            | 1             | 0           | -0.917062               | 2.102664  | -1.365347 |
| 26            | 6             | 0           | 0.199255                | -1.103329 | -0.777934 |
| 27            | 6             | 0           | 1.409946                | -0.744732 | -0.703225 |
| 28            | 8             | 0           | 1.629687                | 2.452349  | -0.828008 |
| 29            | 6             | 0           | 1.752414                | 3.316945  | 0.117449  |

|    |    |   |           |           |           |
|----|----|---|-----------|-----------|-----------|
| 30 | 8  | 0 | 1.644790  | 2.921784  | 1.318107  |
| 31 | 6  | 0 | 2.052588  | 4.752132  | -0.213139 |
| 32 | 1  | 0 | 1.711256  | 5.405512  | 0.591721  |
| 33 | 1  | 0 | 3.136601  | 4.870795  | -0.317407 |
| 34 | 1  | 0 | 1.589788  | 5.030380  | -1.162355 |
| 35 | 6  | 0 | -4.073758 | 4.030383  | 1.511114  |
| 36 | 1  | 0 | -5.130681 | 3.913014  | 1.763213  |
| 37 | 1  | 0 | -3.505038 | 4.036985  | 2.448520  |
| 38 | 1  | 0 | -3.939661 | 5.012105  | 1.045805  |
| 39 | 1  | 0 | -5.326993 | 1.676691  | 0.893348  |
| 40 | 8  | 0 | 1.139427  | -0.242025 | 2.183796  |
| 41 | 6  | 0 | 2.144886  | -0.993884 | 2.573427  |
| 42 | 8  | 0 | 3.213552  | -1.115511 | 1.979017  |
| 43 | 6  | 0 | 1.850301  | -1.734602 | 3.871989  |
| 44 | 1  | 0 | 1.021306  | -2.433659 | 3.720401  |
| 45 | 1  | 0 | 2.735779  | -2.284315 | 4.192503  |
| 46 | 1  | 0 | 1.547243  | -1.027783 | 4.649601  |
| 47 | 14 | 0 | 3.042114  | -1.314476 | -1.513709 |
| 48 | 6  | 0 | 4.390829  | -0.062370 | -1.139569 |
| 49 | 1  | 0 | 5.331453  | -0.356146 | -1.620236 |
| 50 | 1  | 0 | 4.118254  | 0.933324  | -1.503505 |
| 51 | 1  | 0 | 4.550161  | -0.010656 | -0.058911 |
| 52 | 6  | 0 | 2.690712  | -1.402995 | -3.368469 |
| 53 | 1  | 0 | 3.591934  | -1.707160 | -3.913706 |
| 54 | 1  | 0 | 1.900472  | -2.125947 | -3.595736 |
| 55 | 1  | 0 | 2.373412  | -0.430450 | -3.757904 |
| 56 | 6  | 0 | 3.444509  | -3.012321 | -0.804375 |
| 57 | 1  | 0 | 4.376351  | -3.394004 | -1.237819 |
| 58 | 1  | 0 | 3.572252  | -2.932898 | 0.278655  |
| 59 | 1  | 0 | 2.652813  | -3.738716 | -1.015818 |

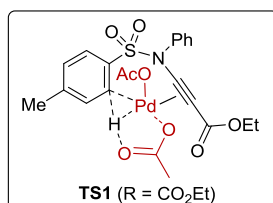

Thermal correction to Gibbs Free Energy = 0.340697 Hartree

Electronic energy = -2034.466795 Hartree

| Center Number | Atomic Number | Atomic Type | Coordinates (Angstroms) |   |   |
|---------------|---------------|-------------|-------------------------|---|---|
|               |               |             | X                       | Y | Z |

---

|    |    |   |           |           |           |
|----|----|---|-----------|-----------|-----------|
| 1  | 6  | 0 | -0.099919 | -2.379315 | -0.138414 |
| 2  | 6  | 0 | 0.445594  | -3.372144 | -0.946720 |
| 3  | 6  | 0 | 1.818809  | -3.620857 | -0.871415 |
| 4  | 6  | 0 | 0.672785  | -1.607424 | 0.761555  |
| 5  | 6  | 0 | 2.042289  | -1.916167 | 0.810855  |
| 6  | 6  | 0 | 2.638497  | -2.897322 | 0.000337  |
| 7  | 1  | 0 | -0.189028 | -3.948335 | -1.610519 |
| 8  | 1  | 0 | 2.667046  | -1.368357 | 1.512311  |
| 9  | 8  | 0 | -2.469993 | -1.902287 | 1.050723  |
| 10 | 16 | 0 | -1.874555 | -2.164187 | -0.253295 |
| 11 | 8  | 0 | -2.444540 | -3.146458 | -1.172899 |
| 12 | 6  | 0 | -3.268153 | 0.170012  | -0.998204 |
| 13 | 6  | 0 | -4.410875 | -0.449986 | -1.507384 |
| 14 | 6  | 0 | -3.328141 | 1.417059  | -0.370195 |
| 15 | 6  | 0 | -5.639893 | 0.196483  | -1.380300 |
| 16 | 1  | 0 | -4.332859 | -1.416596 | -1.992617 |
| 17 | 6  | 0 | -4.562873 | 2.056098  | -0.267093 |
| 18 | 1  | 0 | -2.425882 | 1.878075  | 0.020808  |
| 19 | 6  | 0 | -5.717400 | 1.447990  | -0.765813 |
| 20 | 1  | 0 | -6.535227 | -0.276883 | -1.771050 |
| 21 | 1  | 0 | -4.620424 | 3.028087  | 0.212874  |
| 22 | 1  | 0 | -6.676249 | 1.949356  | -0.675772 |
| 23 | 7  | 0 | -1.998352 | -0.509847 | -1.134162 |
| 24 | 1  | 0 | 0.185772  | -1.274192 | 1.904889  |
| 25 | 6  | 0 | -0.883681 | 0.125269  | -1.294396 |
| 26 | 6  | 0 | 0.289179  | 0.592593  | -1.292138 |
| 27 | 6  | 0 | 1.308347  | 1.132777  | -2.219063 |
| 28 | 8  | 0 | 1.091480  | 2.080716  | -2.939985 |
| 29 | 8  | 0 | 2.462088  | 0.465677  | -2.123865 |
| 30 | 6  | 0 | 3.590183  | 1.091840  | -2.793395 |
| 31 | 1  | 0 | 3.372363  | 1.158956  | -3.863385 |
| 32 | 1  | 0 | 3.688139  | 2.102994  | -2.390242 |
| 33 | 8  | 0 | 0.782106  | 0.863656  | 2.833604  |
| 34 | 6  | 0 | 0.384876  | -0.057733 | 3.622706  |
| 35 | 8  | 0 | -0.036418 | -1.190017 | 3.251601  |
| 36 | 6  | 0 | 0.402813  | 0.262925  | 5.102121  |
| 37 | 1  | 0 | -0.540871 | 0.756482  | 5.357618  |
| 38 | 1  | 0 | 0.484877  | -0.652701 | 5.688757  |



|    |    |   |          |           |           |
|----|----|---|----------|-----------|-----------|
| 39 | 1  | 0 | 1.218290 | 0.950297  | 5.331555  |
| 40 | 6  | 0 | 4.123735 | -3.147315 | 0.067227  |
| 41 | 1  | 0 | 4.479891 | -3.147995 | 1.101987  |
| 42 | 1  | 0 | 4.392527 | -4.103278 | -0.389571 |
| 43 | 1  | 0 | 4.669292 | -2.357641 | -0.462602 |
| 44 | 1  | 0 | 2.250036 | -4.398301 | -1.495890 |
| 45 | 8  | 0 | 2.446840 | 2.712730  | 0.058046  |
| 46 | 6  | 0 | 1.391829 | 3.271927  | 0.356744  |
| 47 | 8  | 0 | 0.284363 | 2.653792  | 0.695530  |
| 48 | 6  | 0 | 1.238913 | 4.786337  | 0.339892  |
| 49 | 1  | 0 | 2.219936 | 5.252806  | 0.242576  |
| 50 | 1  | 0 | 0.615489 | 5.076043  | -0.512112 |
| 51 | 1  | 0 | 0.742198 | 5.133233  | 1.249371  |
| 52 | 46 | 0 | 0.489228 | 0.638303  | 0.791183  |
| 53 | 6  | 0 | 4.813403 | 0.243691  | -2.509930 |
| 54 | 1  | 0 | 4.685419 | -0.774267 | -2.890919 |
| 55 | 1  | 0 | 5.687333 | 0.684519  | -2.999589 |
| 56 | 1  | 0 | 5.009501 | 0.198813  | -1.434954 |

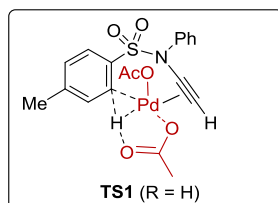

Thermal correction to Gibbs Free Energy = 0.277740 Hartree

Electronic energy = -1767.316472 Hartree

| Center | Atomic | Atomic | Coordinates (Angstroms) |           |           |
|--------|--------|--------|-------------------------|-----------|-----------|
| Number | Number | Type   | X                       | Y         | Z         |
| 1      | 6      | 0      | 0.363397                | -2.269256 | -0.146856 |
| 2      | 6      | 0      | 0.763226                | -3.383472 | -0.878663 |
| 3      | 6      | 0      | 2.120470                | -3.546781 | -1.170938 |
| 4      | 6      | 0      | 1.270788                | -1.289214 | 0.322529  |
| 5      | 6      | 0      | 2.624394                | -1.521908 | 0.025336  |
| 6      | 6      | 0      | 3.070660                | -2.621348 | -0.729319 |
| 7      | 1      | 0      | 0.032403                | -4.114573 | -1.205368 |
| 8      | 1      | 0      | 3.360333                | -0.811716 | 0.395184  |
| 9      | 8      | 0      | -1.617171               | -1.707572 | 1.590795  |
| 10     | 16     | 0      | -1.386920               | -2.175580 | 0.229914  |
| 11     | 8      | 0      | -2.081686               | -3.344822 | -0.305265 |

|    |    |   |           |           |           |
|----|----|---|-----------|-----------|-----------|
| 12 | 6  | 0 | -3.150728 | -0.074491 | -0.398123 |
| 13 | 6  | 0 | -4.337377 | -0.810063 | -0.414219 |
| 14 | 6  | 0 | -3.120864 | 1.258115  | 0.020822  |
| 15 | 6  | 0 | -5.517809 | -0.193162 | -0.001246 |
| 16 | 1  | 0 | -4.329565 | -1.842908 | -0.745028 |
| 17 | 6  | 0 | -4.312756 | 1.864083  | 0.415573  |
| 18 | 1  | 0 | -2.183634 | 1.806503  | 0.032006  |
| 19 | 6  | 0 | -5.508457 | 1.141683  | 0.408800  |
| 20 | 1  | 0 | -6.445979 | -0.756049 | -0.008546 |
| 21 | 1  | 0 | -4.302167 | 2.900708  | 0.737829  |
| 22 | 1  | 0 | -6.431662 | 1.618675  | 0.723530  |
| 23 | 7  | 0 | -1.933190 | -0.725714 | -0.826876 |
| 24 | 1  | 0 | 1.086355  | -0.712323 | 1.471612  |
| 25 | 6  | 0 | -0.989672 | -0.106238 | -1.458515 |
| 26 | 6  | 0 | 0.091377  | 0.390438  | -1.879186 |
| 27 | 8  | 0 | 1.873619  | 1.552371  | 1.686591  |
| 28 | 6  | 0 | 1.743922  | 0.840827  | 2.736747  |
| 29 | 8  | 0 | 1.247195  | -0.323653 | 2.759186  |
| 30 | 6  | 0 | 2.195368  | 1.459147  | 4.042497  |
| 31 | 1  | 0 | 1.357168  | 2.025626  | 4.462094  |
| 32 | 1  | 0 | 2.477716  | 0.682529  | 4.754271  |
| 33 | 1  | 0 | 3.020371  | 2.151655  | 3.869645  |
| 34 | 6  | 0 | 4.535305  | -2.783270 | -1.049917 |
| 35 | 1  | 0 | 5.146337  | -2.718786 | -0.143447 |
| 36 | 1  | 0 | 4.738798  | -3.743078 | -1.531128 |
| 37 | 1  | 0 | 4.874628  | -1.988556 | -1.724064 |
| 38 | 1  | 0 | 2.437904  | -4.414791 | -1.741926 |
| 39 | 8  | 0 | 2.101910  | 2.624114  | -2.222277 |
| 40 | 6  | 0 | 1.359923  | 3.304690  | -1.516000 |
| 41 | 8  | 0 | 0.631717  | 2.855522  | -0.519916 |
| 42 | 6  | 0 | 1.208788  | 4.808810  | -1.713732 |
| 43 | 1  | 0 | 1.661377  | 5.102381  | -2.661681 |
| 44 | 1  | 0 | 0.155656  | 5.100174  | -1.688419 |
| 45 | 1  | 0 | 1.714047  | 5.331011  | -0.894958 |
| 46 | 46 | 0 | 0.935413  | 0.904868  | -0.060904 |
| 47 | 1  | 0 | 0.619544  | 0.589633  | -2.796953 |

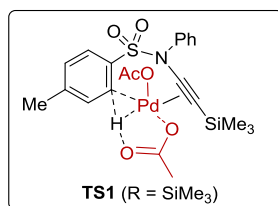

Thermal correction to Gibbs Free Energy = 0.372266 Hartree

Electronic energy = -2175.961643 Hartree

| Center Number | Atomic Number | Atomic Type | Coordinates (Angstroms) |           |           |
|---------------|---------------|-------------|-------------------------|-----------|-----------|
|               |               |             | X                       | Y         | Z         |
| 1             | 6             | 0           | 0.353359                | -2.400652 | 0.088495  |
| 2             | 6             | 0           | 0.943406                | -3.399061 | -0.677722 |
| 3             | 6             | 0           | 2.339660                | -3.482315 | -0.716423 |
| 4             | 6             | 0           | 1.103973                | -1.461894 | 0.835202  |
| 5             | 6             | 0           | 2.499883                | -1.603532 | 0.776778  |
| 6             | 6             | 0           | 3.138983                | -2.590501 | 0.005479  |
| 7             | 1             | 0           | 0.327545                | -4.103360 | -1.225702 |
| 8             | 1             | 0           | 3.110099                | -0.922376 | 1.365385  |
| 9             | 8             | 0           | -1.940192               | -2.089974 | 1.464049  |
| 10            | 16            | 0           | -1.442769               | -2.385563 | 0.125256  |
| 11            | 8             | 0           | -1.961907               | -3.516280 | -0.643400 |
| 12            | 6             | 0           | -3.137222               | -0.314642 | -0.671369 |
| 13            | 6             | 0           | -4.246593               | -1.095832 | -1.004712 |
| 14            | 6             | 0           | -3.282785               | 0.980217  | -0.163952 |
| 15            | 6             | 0           | -5.524483               | -0.569693 | -0.819292 |
| 16            | 1             | 0           | -4.104294               | -2.095119 | -1.401140 |
| 17            | 6             | 0           | -4.568500               | 1.497058  | -0.004642 |
| 18            | 1             | 0           | -2.409541               | 1.572684  | 0.093948  |
| 19            | 6             | 0           | -5.688065               | 0.725913  | -0.324797 |
| 20            | 1             | 0           | -6.391749               | -1.171760 | -1.072414 |
| 21            | 1             | 0           | -4.691514               | 2.503752  | 0.383128  |
| 22            | 1             | 0           | -6.685301               | 1.133670  | -0.189418 |
| 23            | 7             | 0           | -1.820192               | -0.877387 | -0.870674 |
| 24            | 1             | 0           | 0.694256                | -1.092275 | 1.984262  |
| 25            | 6             | 0           | -0.781496               | -0.133975 | -1.167614 |
| 26            | 6             | 0           | 0.300500                | 0.452832  | -1.421996 |
| 27            | 8             | 0           | 0.874155                | 1.201725  | 2.682833  |
| 28            | 6             | 0           | 0.762623                | 0.302233  | 3.582428  |
| 29            | 8             | 0           | 0.587650                | -0.926345 | 3.352107  |

|    |    |   |           |           |           |
|----|----|---|-----------|-----------|-----------|
| 30 | 6  | 0 | 0.819673  | 0.775222  | 5.019953  |
| 31 | 1  | 0 | -0.184486 | 1.097550  | 5.315133  |
| 32 | 1  | 0 | 1.130715  | -0.038262 | 5.676142  |
| 33 | 1  | 0 | 1.490797  | 1.630591  | 5.111456  |
| 34 | 6  | 0 | 4.644570  | -2.684528 | -0.021536 |
| 35 | 1  | 0 | 5.041178  | -2.885927 | 0.979859  |
| 36 | 1  | 0 | 4.986167  | -3.481833 | -0.686245 |
| 37 | 1  | 0 | 5.091411  | -1.743660 | -0.360777 |
| 38 | 1  | 0 | 2.806550  | -4.263551 | -1.309913 |
| 39 | 8  | 0 | 1.945843  | 3.272974  | 0.004366  |
| 40 | 6  | 0 | 0.769664  | 3.517797  | 0.271785  |
| 41 | 8  | 0 | -0.157476 | 2.620361  | 0.500126  |
| 42 | 6  | 0 | 0.243428  | 4.944275  | 0.377082  |
| 43 | 1  | 0 | 0.998703  | 5.644394  | 0.018065  |
| 44 | 1  | 0 | -0.681106 | 5.058838  | -0.195318 |
| 45 | 1  | 0 | 0.011688  | 5.165271  | 1.423737  |
| 46 | 46 | 0 | 0.529041  | 0.720603  | 0.693421  |
| 47 | 14 | 0 | 1.509319  | 0.968383  | -2.779874 |
| 48 | 6  | 0 | 3.258597  | 0.917443  | -2.097812 |
| 49 | 1  | 0 | 3.975212  | 1.232726  | -2.864947 |
| 50 | 1  | 0 | 3.330119  | 1.602851  | -1.248393 |
| 51 | 1  | 0 | 3.535545  | -0.089521 | -1.770660 |
| 52 | 6  | 0 | 1.040702  | 2.702272  | -3.344503 |
| 53 | 1  | 0 | 1.253356  | 3.422243  | -2.550350 |
| 54 | 1  | 0 | 1.632332  | 2.979418  | -4.224865 |
| 55 | 1  | 0 | -0.017782 | 2.773192  | -3.613598 |
| 56 | 6  | 0 | 1.279562  | -0.280228 | -4.182627 |
| 57 | 1  | 0 | 1.950782  | -0.045768 | -5.017012 |
| 58 | 1  | 0 | 1.503152  | -1.299844 | -3.851669 |
| 59 | 1  | 0 | 0.254241  | -0.268445 | -4.567096 |

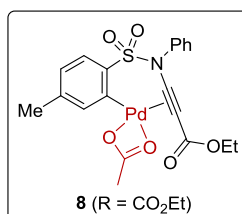

Thermal correction to Gibbs Free Energy = 0.290265 Hartree

Electronic energy = -1805.431156 Hartree

Center Atomic Atomic Coordinates (Angstroms)

| Number | Number | Type | X         | Y         | Z         |
|--------|--------|------|-----------|-----------|-----------|
| 1      | 6      | 0    | 1.026871  | -2.040499 | 0.245768  |
| 2      | 6      | 0    | 1.692568  | -3.021147 | 0.986285  |
| 3      | 6      | 0    | 1.045678  | -3.576283 | 2.086334  |
| 4      | 6      | 0    | -0.257641 | -1.597170 | 0.575230  |
| 5      | 6      | 0    | -0.880712 | -2.168134 | 1.686132  |
| 6      | 6      | 0    | -0.242814 | -3.159091 | 2.451758  |
| 7      | 46     | 0    | -1.252546 | -0.277305 | -0.548647 |
| 8      | 1      | 0    | 2.688772  | -3.336936 | 0.695364  |
| 9      | 1      | 0    | -1.882834 | -1.850564 | 1.960991  |
| 10     | 8      | 0    | 1.028327  | -1.526426 | -2.386006 |
| 11     | 16     | 0    | 1.845947  | -1.361398 | -1.187970 |
| 12     | 8      | 0    | 3.262414  | -1.709328 | -1.177837 |
| 13     | 6      | 0    | 2.963465  | 1.083678  | -0.355666 |
| 14     | 6      | 0    | 4.044444  | 1.191621  | -1.234798 |
| 15     | 6      | 0    | 3.017177  | 1.649603  | 0.921225  |
| 16     | 6      | 0    | 5.194395  | 1.861249  | -0.820159 |
| 17     | 1      | 0    | 3.980977  | 0.753658  | -2.223914 |
| 18     | 6      | 0    | 4.166463  | 2.332640  | 1.316408  |
| 19     | 1      | 0    | 2.164687  | 1.572793  | 1.587348  |
| 20     | 6      | 0    | 5.257547  | 2.434945  | 0.451434  |
| 21     | 1      | 0    | 6.037715  | 1.943204  | -1.498894 |
| 22     | 1      | 0    | 4.206933  | 2.782517  | 2.303629  |
| 23     | 1      | 0    | 6.151695  | 2.965221  | 0.764885  |
| 24     | 7      | 0    | 1.774535  | 0.395088  | -0.799866 |
| 25     | 6      | 0    | 0.563748  | 0.838502  | -0.451992 |
| 26     | 6      | 0    | -0.332934 | 1.550189  | 0.075301  |
| 27     | 6      | 0    | -0.944656 | 2.710239  | 0.690077  |
| 28     | 8      | 0    | -0.316319 | 3.728142  | 0.910162  |
| 29     | 8      | 0    | -2.237804 | 2.514771  | 0.994578  |
| 30     | 6      | 0    | -2.922022 | 3.650876  | 1.580874  |
| 31     | 1      | 0    | -2.833251 | 4.500766  | 0.897512  |
| 32     | 1      | 0    | -2.418589 | 3.918931  | 2.514968  |
| 33     | 8      | 0    | -2.890213 | -1.486191 | -1.075593 |
| 34     | 6      | 0    | -3.405909 | -0.552726 | -1.799576 |
| 35     | 8      | 0    | -2.842279 | 0.581050  | -1.835471 |
| 36     | 6      | 0    | -4.642590 | -0.844935 | -2.602479 |
| 37     | 1      | 0    | -4.360805 | -1.423875 | -3.488400 |

|    |   |   |           |           |           |
|----|---|---|-----------|-----------|-----------|
| 38 | 1 | 0 | -5.336996 | -1.451170 | -2.015983 |
| 39 | 1 | 0 | -5.117293 | 0.083856  | -2.921496 |
| 40 | 6 | 0 | -0.927116 | -3.742404 | 3.664546  |
| 41 | 1 | 0 | -0.583068 | -4.760825 | 3.865793  |
| 42 | 1 | 0 | -0.715687 | -3.142375 | 4.558349  |
| 43 | 1 | 0 | -2.013033 | -3.766307 | 3.536726  |
| 44 | 1 | 0 | 1.546628  | -4.345302 | 2.667534  |
| 45 | 6 | 0 | -4.365277 | 3.244131  | 1.802929  |
| 46 | 1 | 0 | -4.919680 | 4.079414  | 2.242025  |
| 47 | 1 | 0 | -4.841574 | 2.971043  | 0.857334  |
| 48 | 1 | 0 | -4.431502 | 2.390878  | 2.484138  |

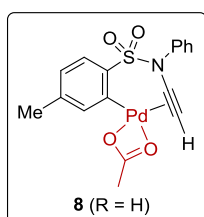

Thermal correction to Gibbs Free Energy = 0.228029 Hartree

Electronic energy = -1538.280339 Hartree

| Center | Atomic | Atomic | Coordinates (Angstroms) |           |           |
|--------|--------|--------|-------------------------|-----------|-----------|
| Number | Number | Type   | X                       | Y         | Z         |
| 1      | 6      | 0      | 0.598270                | 0.948694  | 1.067130  |
| 2      | 6      | 0      | 1.278462                | 2.142697  | 1.361797  |
| 3      | 6      | 0      | 0.854163                | 3.324632  | 0.775455  |
| 4      | 6      | 0      | -0.495714               | 0.891824  | 0.188375  |
| 5      | 6      | 0      | -0.887787               | 2.118127  | -0.379554 |
| 6      | 6      | 0      | -0.234932               | 3.327131  | -0.110648 |
| 7      | 46     | 0      | -1.756875               | -0.605520 | -0.284150 |
| 8      | 1      | 0      | 2.117342                | 2.128559  | 2.048313  |
| 9      | 1      | 0      | -1.748041               | 2.133395  | -1.042786 |
| 10     | 8      | 0      | 0.266386                | -1.334723 | 2.505457  |
| 11     | 16     | 0      | 1.269403                | -0.509442 | 1.847066  |
| 12     | 8      | 0      | 2.551722                | -0.210089 | 2.477562  |
| 13     | 6      | 0      | 2.798103                | -0.992059 | -0.505028 |
| 14     | 6      | 0      | 4.088496                | -1.136717 | 0.009358  |
| 15     | 6      | 0      | 2.579748                | -0.438247 | -1.769491 |
| 16     | 6      | 0      | 5.173703                | -0.714813 | -0.758220 |
| 17     | 1      | 0      | 4.230095                | -1.566594 | 0.993613  |

|    |   |   |           |           |           |
|----|---|---|-----------|-----------|-----------|
| 18 | 6 | 0 | 3.674918  | -0.032030 | -2.530342 |
| 19 | 1 | 0 | 1.567651  | -0.335996 | -2.147305 |
| 20 | 6 | 0 | 4.970725  | -0.166455 | -2.026355 |
| 21 | 1 | 0 | 6.179814  | -0.823576 | -0.365274 |
| 22 | 1 | 0 | 3.513083  | 0.394548  | -3.515553 |
| 23 | 1 | 0 | 5.820406  | 0.153655  | -2.621801 |
| 24 | 7 | 0 | 1.682770  | -1.446013 | 0.296354  |
| 25 | 6 | 0 | 0.612663  | -1.955037 | -0.231522 |
| 26 | 6 | 0 | -0.547724 | -2.264246 | -0.612282 |
| 27 | 8 | 0 | -3.579957 | 0.473635  | -0.061408 |
| 28 | 6 | 0 | -4.251945 | -0.571082 | -0.378428 |
| 29 | 8 | 0 | -3.629317 | -1.640642 | -0.673888 |
| 30 | 6 | 0 | -5.755362 | -0.527961 | -0.363865 |
| 31 | 1 | 0 | -6.105576 | -0.728940 | 0.654466  |
| 32 | 1 | 0 | -6.109259 | 0.463558  | -0.653452 |
| 33 | 1 | 0 | -6.162545 | -1.292401 | -1.027702 |
| 34 | 6 | 0 | -0.682622 | 4.608863  | -0.770120 |
| 35 | 1 | 0 | -0.739510 | 5.427737  | -0.045483 |
| 36 | 1 | 0 | 0.024673  | 4.916803  | -1.549898 |
| 37 | 1 | 0 | -1.664708 | 4.496948  | -1.236372 |
| 38 | 1 | 0 | 1.368369  | 4.253006  | 1.008351  |
| 39 | 1 | 0 | -1.075036 | -3.178978 | -0.835079 |

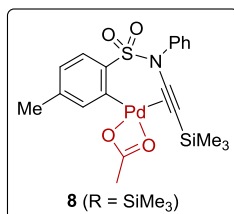

Thermal correction to Gibbs Free Energy = 0.320839 Hartree

Electronic energy = -1946.926469 Hartree

| Center | Atomic | Atomic | Coordinates (Angstroms) |           |           |
|--------|--------|--------|-------------------------|-----------|-----------|
| Number | Number | Type   | X                       | Y         | Z         |
| 1      | 6      | 0      | 0.978182                | -2.052627 | -0.253593 |
| 2      | 6      | 0      | 1.758167                | -3.134535 | 0.167528  |
| 3      | 6      | 0      | 1.344100                | -3.863713 | 1.276782  |
| 4      | 6      | 0      | -0.195469               | -1.673894 | 0.404986  |
| 5      | 6      | 0      | -0.585672               | -2.425820 | 1.517778  |
| 6      | 6      | 0      | 0.171792                | -3.519186 | 1.967162  |

|    |    |   |           |           |           |
|----|----|---|-----------|-----------|-----------|
| 7  | 46 | 0 | -1.421999 | -0.245881 | -0.255301 |
| 8  | 1  | 0 | 2.662299  | -3.390832 | -0.374288 |
| 9  | 1  | 0 | -1.503090 | -2.170601 | 2.040835  |
| 10 | 8  | 0 | 0.479493  | -1.061238 | -2.700542 |
| 11 | 16 | 0 | 1.519052  | -1.124565 | -1.677550 |
| 12 | 8  | 0 | 2.895851  | -1.474225 | -2.013770 |
| 13 | 6  | 0 | 2.835514  | 0.951384  | -0.382651 |
| 14 | 6  | 0 | 3.900201  | 1.262590  | -1.232299 |
| 15 | 6  | 0 | 2.969446  | 1.068367  | 1.003890  |
| 16 | 6  | 0 | 5.109127  | 1.689329  | -0.684108 |
| 17 | 1  | 0 | 3.775145  | 1.162743  | -2.304054 |
| 18 | 6  | 0 | 4.178727  | 1.509601  | 1.540026  |
| 19 | 1  | 0 | 2.130911  | 0.826957  | 1.648788  |
| 20 | 6  | 0 | 5.250451  | 1.817566  | 0.699247  |
| 21 | 1  | 0 | 5.938741  | 1.929556  | -1.342012 |
| 22 | 1  | 0 | 4.283984  | 1.606032  | 2.616587  |
| 23 | 1  | 0 | 6.191394  | 2.158548  | 1.120585  |
| 24 | 7  | 0 | 1.590007  | 0.513230  | -0.972073 |
| 25 | 6  | 0 | 0.425734  | 0.949066  | -0.454549 |
| 26 | 6  | 0 | -0.406857 | 1.636121  | 0.187895  |
| 27 | 8  | 0 | -3.115191 | -1.480202 | -0.514402 |
| 28 | 6  | 0 | -3.833445 | -0.496124 | -0.918287 |
| 29 | 8  | 0 | -3.339048 | 0.673958  | -0.914395 |
| 30 | 6  | 0 | -5.227588 | -0.753560 | -1.420334 |
| 31 | 1  | 0 | -5.175539 | -1.021068 | -2.481336 |
| 32 | 1  | 0 | -5.676948 | -1.590618 | -0.882236 |
| 33 | 1  | 0 | -5.839780 | 0.144178  | -1.319095 |
| 34 | 6  | 0 | -0.256718 | -4.295754 | 3.189270  |
| 35 | 1  | 0 | 0.002236  | -5.354916 | 3.099078  |
| 36 | 1  | 0 | 0.240423  | -3.914685 | 4.090051  |
| 37 | 1  | 0 | -1.335235 | -4.219975 | 3.352671  |
| 38 | 1  | 0 | 1.935337  | -4.712259 | 1.609796  |
| 39 | 14 | 0 | -1.361111 | 3.072923  | 0.909613  |
| 40 | 6  | 0 | -0.044463 | 4.218618  | 1.638061  |
| 41 | 1  | 0 | -0.518535 | 5.107353  | 2.070670  |
| 42 | 1  | 0 | 0.527847  | 3.725176  | 2.429982  |
| 43 | 1  | 0 | 0.660926  | 4.556041  | 0.872071  |
| 44 | 6  | 0 | -2.325215 | 3.921379  | -0.465537 |
| 45 | 1  | 0 | -2.896527 | 4.769869  | -0.071090 |



|    |   |   |           |          |           |
|----|---|---|-----------|----------|-----------|
| 46 | 1 | 0 | -1.655904 | 4.297607 | -1.245899 |
| 47 | 1 | 0 | -3.023203 | 3.214867 | -0.923579 |
| 48 | 6 | 0 | -2.512327 | 2.426537 | 2.253234  |
| 49 | 1 | 0 | -3.053205 | 3.253472 | 2.727491  |
| 50 | 1 | 0 | -3.249817 | 1.741462 | 1.824207  |
| 51 | 1 | 0 | -1.959790 | 1.892701 | 3.033223  |

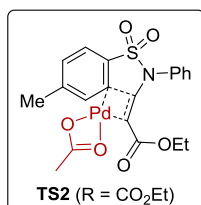

Thermal correction to Gibbs Free Energy = 0.290461 Hartree

Electronic energy = -1805.408101 Hartree

| Center Number | Atomic Number | Atomic Type | Coordinates (Angstroms) |           |           |
|---------------|---------------|-------------|-------------------------|-----------|-----------|
|               |               |             | X                       | Y         | Z         |
| 1             | 6             | 0           | -0.455806               | -2.531221 | -0.163710 |
| 2             | 6             | 0           | -0.437388               | -3.833387 | -0.652809 |
| 3             | 6             | 0           | 0.588668                | -4.200090 | -1.521337 |
| 4             | 6             | 0           | 0.487851                | -1.574809 | -0.540322 |
| 5             | 6             | 0           | 1.440554                | -1.936784 | -1.506476 |
| 6             | 6             | 0           | 1.529944                | -3.258655 | -1.968267 |
| 7             | 46            | 0           | 1.308086                | 0.007823  | 0.536561  |
| 8             | 1             | 0           | -1.227933               | -4.526913 | -0.385984 |
| 9             | 1             | 0           | 2.135179                | -1.194452 | -1.888270 |
| 10            | 8             | 0           | -1.613060               | -1.580949 | 2.092935  |
| 11            | 16            | 0           | -1.874346               | -1.894611 | 0.688828  |
| 12            | 8             | 0           | -3.079162               | -2.628844 | 0.313538  |
| 13            | 6             | 0           | -2.932279               | 0.543916  | 0.041650  |
| 14            | 6             | 0           | -2.777402               | 1.582897  | 0.964341  |
| 15            | 6             | 0           | -4.150594               | 0.330888  | -0.607000 |
| 16            | 6             | 0           | -3.856048               | 2.426062  | 1.223091  |
| 17            | 1             | 0           | -1.826716               | 1.726723  | 1.465930  |
| 18            | 6             | 0           | -5.226296               | 1.174410  | -0.330391 |
| 19            | 1             | 0           | -4.242535               | -0.487662 | -1.311696 |
| 20            | 6             | 0           | -5.079238               | 2.222967  | 0.579140  |
| 21            | 1             | 0           | -3.742068               | 3.238468  | 1.934219  |
| 22            | 1             | 0           | -6.176200               | 1.014157  | -0.830970 |
| 23            | 1             | 0           | -5.916583               | 2.882538  | 0.786680  |

|    |   |   |           |           |           |
|----|---|---|-----------|-----------|-----------|
| 24 | 7 | 0 | -1.852654 | -0.374385 | -0.243198 |
| 25 | 6 | 0 | -0.595819 | 0.094219  | -0.486732 |
| 26 | 6 | 0 | 0.139177  | 1.134526  | -0.715460 |
| 27 | 6 | 0 | 0.194108  | 2.440212  | -1.352110 |
| 28 | 8 | 0 | -0.773164 | 2.973730  | -1.864279 |
| 29 | 8 | 0 | 1.427165  | 2.976704  | -1.299145 |
| 30 | 6 | 0 | 1.563530  | 4.295854  | -1.878325 |
| 31 | 1 | 0 | 0.877267  | 4.976525  | -1.364425 |
| 32 | 1 | 0 | 1.260779  | 4.252460  | -2.929527 |
| 33 | 8 | 0 | 2.631939  | -0.888807 | 2.007120  |
| 34 | 6 | 0 | 3.079166  | 0.269537  | 2.289964  |
| 35 | 8 | 0 | 2.653182  | 1.278226  | 1.628738  |
| 36 | 6 | 0 | 4.066601  | 0.459369  | 3.409120  |
| 37 | 1 | 0 | 3.516061  | 0.603265  | 4.345186  |
| 38 | 1 | 0 | 4.691861  | -0.429080 | 3.515286  |
| 39 | 1 | 0 | 4.679846  | 1.344530  | 3.231202  |
| 40 | 6 | 0 | 2.623194  | -3.658950 | -2.928612 |
| 41 | 1 | 0 | 3.493760  | -4.043510 | -2.383593 |
| 42 | 1 | 0 | 2.288512  | -4.447114 | -3.609043 |
| 43 | 1 | 0 | 2.961069  | -2.808437 | -3.527038 |
| 44 | 1 | 0 | 0.629427  | -5.217773 | -1.898787 |
| 45 | 6 | 0 | 3.011491  | 4.714938  | -1.714702 |
| 46 | 1 | 0 | 3.679868  | 4.023048  | -2.235153 |
| 47 | 1 | 0 | 3.156158  | 5.715618  | -2.133911 |
| 48 | 1 | 0 | 3.292733  | 4.736351  | -0.658333 |

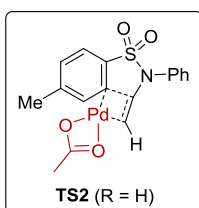

Thermal correction to Gibbs Free Energy = 0.228440 Hartree

Electronic energy = -1538.254519 Hartree

| Center Number | Atomic Number | Atomic Type | Coordinates (Angstroms) |          |           |
|---------------|---------------|-------------|-------------------------|----------|-----------|
|               |               |             | X                       | Y        | Z         |
| 1             | 6             | 0           | -0.267308               | 1.828331 | 0.689663  |
| 2             | 6             | 0           | -0.651829               | 3.132453 | 0.985477  |
| 3             | 6             | 0           | -1.745628               | 3.670179 | 0.311245  |
| 4             | 6             | 0           | -0.910660               | 1.055532 | -0.277892 |

|    |    |   |           |           |           |
|----|----|---|-----------|-----------|-----------|
| 5  | 6  | 0 | -1.932785 | 1.663515  | -1.025916 |
| 6  | 6  | 0 | -2.390319 | 2.951004  | -0.708248 |
| 7  | 46 | 0 | -1.283626 | -0.994927 | -0.376327 |
| 8  | 1  | 0 | -0.082351 | 3.718275  | 1.699443  |
| 9  | 1  | 0 | -2.395624 | 1.127346  | -1.849078 |
| 10 | 8  | 0 | 1.113913  | 0.069402  | 2.207995  |
| 11 | 16 | 0 | 1.276862  | 1.177311  | 1.265368  |
| 12 | 8  | 0 | 2.224023  | 2.249466  | 1.558496  |
| 13 | 6  | 0 | 2.960033  | -0.162928 | -0.389056 |
| 14 | 6  | 0 | 3.085431  | -1.509950 | -0.032658 |
| 15 | 6  | 0 | 4.074486  | 0.585507  | -0.772961 |
| 16 | 6  | 0 | 4.341515  | -2.111926 | -0.083954 |
| 17 | 1  | 0 | 2.211462  | -2.070373 | 0.280616  |
| 18 | 6  | 0 | 5.328535  | -0.025160 | -0.812748 |
| 19 | 1  | 0 | 3.946614  | 1.631189  | -1.030042 |
| 20 | 6  | 0 | 5.461851  | -1.372535 | -0.473371 |
| 21 | 1  | 0 | 4.446613  | -3.157262 | 0.190305  |
| 22 | 1  | 0 | 6.198529  | 0.552259  | -1.110189 |
| 23 | 1  | 0 | 6.438159  | -1.846866 | -0.508840 |
| 24 | 7  | 0 | 1.684885  | 0.520826  | -0.331864 |
| 25 | 6  | 0 | 0.602606  | -0.047642 | -0.971365 |
| 26 | 6  | 0 | 0.192693  | -0.956542 | -1.779559 |
| 27 | 8  | 0 | -2.861792 | -1.413125 | 1.064369  |
| 28 | 6  | 0 | -2.981655 | -2.577173 | 0.565677  |
| 29 | 8  | 0 | -2.266538 | -2.897505 | -0.447353 |
| 30 | 6  | 0 | -3.920438 | -3.583561 | 1.174067  |
| 31 | 1  | 0 | -3.379777 | -4.155891 | 1.935760  |
| 32 | 1  | 0 | -4.756806 | -3.075830 | 1.657762  |
| 33 | 1  | 0 | -4.278564 | -4.279597 | 0.413258  |
| 34 | 6  | 0 | -3.558995 | 3.550254  | -1.452081 |
| 35 | 1  | 0 | -4.497389 | 3.354283  | -0.919300 |
| 36 | 1  | 0 | -3.457832 | 4.635122  | -1.548240 |
| 37 | 1  | 0 | -3.656563 | 3.123869  | -2.454303 |
| 38 | 1  | 0 | -2.071030 | 4.680597  | 0.541581  |
| 39 | 1  | 0 | 0.355329  | -1.555314 | -2.656533 |

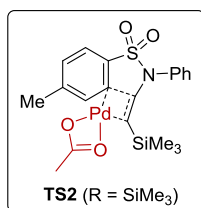

Thermal correction to Gibbs Free Energy = 0.320403 Hartree

Electronic energy = -1946.900134 Hartree

| Center Number | Atomic Number | Atomic Type | Coordinates (Angstroms) |           |           |
|---------------|---------------|-------------|-------------------------|-----------|-----------|
|               |               |             | X                       | Y         | Z         |
| 1             | 6             | 0           | 0.599955                | 2.474035  | -0.086555 |
| 2             | 6             | 0           | 1.130774                | 3.711935  | 0.260452  |
| 3             | 6             | 0           | 2.218830                | 3.746300  | 1.129626  |
| 4             | 6             | 0           | 1.085511                | 1.270351  | 0.431345  |
| 5             | 6             | 0           | 2.104678                | 1.345364  | 1.398627  |
| 6             | 6             | 0           | 2.710469                | 2.568943  | 1.717555  |
| 7             | 46            | 0           | 1.284312                | -0.607131 | -0.444788 |
| 8             | 1             | 0           | 0.677230                | 4.623171  | -0.115360 |
| 9             | 1             | 0           | 2.447239                | 0.442151  | 1.894661  |
| 10            | 8             | 0           | -0.827750               | 1.798584  | -2.283131 |
| 11            | 16            | 0           | -0.952164               | 2.342771  | -0.929778 |
| 12            | 8             | 0           | -1.778646               | 3.525066  | -0.696934 |
| 13            | 6             | 0           | -2.843739               | 0.567430  | -0.140464 |
| 14            | 6             | 0           | -3.048724               | -0.497383 | -1.025352 |
| 15            | 6             | 0           | -3.924464               | 1.221028  | 0.455479  |
| 16            | 6             | 0           | -4.349944               | -0.920817 | -1.291273 |
| 17            | 1             | 0           | -2.198977               | -0.981299 | -1.493916 |
| 18            | 6             | 0           | -5.223594               | 0.795911  | 0.173501  |
| 19            | 1             | 0           | -3.735648               | 2.052501  | 1.125313  |
| 20            | 6             | 0           | -5.437122               | -0.276585 | -0.693598 |
| 21            | 1             | 0           | -4.515343               | -1.747097 | -1.976195 |
| 22            | 1             | 0           | -6.066261               | 1.301862  | 0.634761  |
| 23            | 1             | 0           | -6.448610               | -0.609070 | -0.907504 |
| 24            | 7             | 0           | -1.518143               | 1.062153  | 0.156671  |
| 25            | 6             | 0           | -0.523487               | 0.166701  | 0.502126  |
| 26            | 6             | 0           | -0.294015               | -1.057098 | 0.841510  |
| 27            | 8             | 0           | 2.923646                | -0.538724 | -1.892088 |
| 28            | 6             | 0           | 2.861898                | -1.803364 | -1.997328 |
| 29            | 8             | 0           | 2.033891                | -2.454343 | -1.267852 |

|    |    |   |           |           |           |
|----|----|---|-----------|-----------|-----------|
| 30 | 6  | 0 | 3.721719  | -2.534535 | -2.994237 |
| 31 | 1  | 0 | 3.178279  | -2.608135 | -3.942596 |
| 32 | 1  | 0 | 4.646500  | -1.982975 | -3.172548 |
| 33 | 1  | 0 | 3.937032  | -3.546028 | -2.644534 |
| 34 | 6  | 0 | 3.874089  | 2.618182  | 2.677869  |
| 35 | 1  | 0 | 4.825812  | 2.597785  | 2.133224  |
| 36 | 1  | 0 | 3.859857  | 3.533600  | 3.276606  |
| 37 | 1  | 0 | 3.867960  | 1.762326  | 3.358480  |
| 38 | 1  | 0 | 2.659041  | 4.702620  | 1.397226  |
| 39 | 14 | 0 | -0.598624 | -2.701311 | 1.662060  |
| 40 | 6  | 0 | -0.843304 | -3.992260 | 0.311218  |
| 41 | 1  | 0 | -0.964838 | -4.990938 | 0.746552  |
| 42 | 1  | 0 | -1.733878 | -3.776848 | -0.288141 |
| 43 | 1  | 0 | 0.022886  | -4.009158 | -0.357647 |
| 44 | 6  | 0 | -2.138785 | -2.528376 | 2.744427  |
| 45 | 1  | 0 | -3.011195 | -2.237159 | 2.150942  |
| 46 | 1  | 0 | -2.369327 | -3.481121 | 3.235239  |
| 47 | 1  | 0 | -1.995789 | -1.775043 | 3.525942  |
| 48 | 6  | 0 | 0.916579  | -3.118736 | 2.708392  |
| 49 | 1  | 0 | 1.085829  | -2.368022 | 3.487430  |
| 50 | 1  | 0 | 0.789626  | -4.089876 | 3.200394  |
| 51 | 1  | 0 | 1.813502  | -3.173103 | 2.082963  |
